# Supplementary material for: Long-term consequences of the absence of leptin signaling in early life
Source: eLife. 2019 Jan 29;8:e40970. doi: 10.7554/eLife.40970 (PMC6384028; doi:10.7554/eLife.40970)
Supplement: Figure 1—source data 1. [file elife-40970-fig1-data1.xlsx]

## Sheet: Fig 1A
Weeks	Ubi males body weight (g), n = 12												Weeks	LepRNull male mice body weight (g), n = 8								Weeks	Ubi-LepRNull male mice body weight (g), n = 10
9	24.3	20.7	20.2	21.1	20.6	21.9	20.5	21.6	21.6	23.5	24.5	24	9	42.1	40.5	37.2	41.8	50.3	50.5	51.6	52.2	9	35.7	40	42.8	40.5	41.2	43.5	39.5	51.7	54.2	53.6
	24.6	21	21	22.7	20.8	22.2	21	21.7	22.2	23.6	24.4	24.7		43	41.3	37.4	41.9	50.3	50.9	51.8	53.2		36.5	41.5	44.2	40.9	42	43.3	40	52.2	54.6	53.7
	24.3	21.3	20.8	22.6	21.2	22.3	20.9	21.9	22.3	24	24.3	24.8		44.1	41.4	37.9	43.4	51.3	51.7	51.8	53.4		37.3	41.9	45.5	41.3	43.7	45.4	41	53.1	55.1	54.5
10	24.6	21	21.2	22.5	21.5	22.3	21	22	22.8	24.2	24.6	24.7	10	44.7	42.8	39.3	43.8	52.3	53.3	52.2	53.6	10	37.6	43.6	46.4	42.2	45.4	46.7	42.8	53.5	55.5	55.7
	23.3	20.3	20.3	22	20.4	21.5	19.4	21.5	22.1	22.9	22.4	22.6		44.1	41.9	39	44	50.9	51.6	51	52.3		37.5	42.8	45.7	41.6	44	45	41.1	51.9	52.8	53.5
	23.9	20.5	20.7	22.3	21.1	22.1	18	21.7	23	23.4	22.3	23.6		43.2	41.9	38.7	43.7	49.9	50.7	50.9	52.2		36.3	42.5	45.1	40.6	43.4	44.4	39.6	51.6	52.1	53
	24.5	20.9	21.2	22.7	21.9	21.9	18	22.6	23.7	23.3	22.3	24.7		42	41.4	38.5	43.2	49.2	49.4	50	51.6		35.6	41.5	43.9	40.5	42.3	42.9	38.4	50	50.9	51.7
	24.7	21	21.7	22.5	21.4	21.6	18.5	21.5	22.8	23.4	22.3	25.1		40.8	41	38.1	42.5	49	49	49.8	51.4		33.4	41.1	42.4	39.4	41.6	42.2	37.1	48.9	49.4	50.4
	24.9	21.8	21.6	22.2	21.8	22.1	18.9	21.4	23.7	23.5	21.9	24.5		41	41.4	38.5	42.5	48.4	48.7	49.4	50.4		32.2	39	41.7	38.4	40.4	39.8	35.5	47.3	46.8	47.7
11	25.7	22.3	23.2	22.9	22.3	22.9	19.4	22.3	24	23.4	23.7	25.6	11	41.2	40.6	38.3	43.1	48.2	48.3	49.1	50.5	11		35	41.2	37.3	38	36.2		43.8	43.8	45
	26.2	22.9	23.1	24.1	23.3	24.4	20.3	22.7	25	26	23.5	26.6		41.8	41.6	38.7	43.4	49.1	49.8	48.9	50			31.5	38.6	34.1	35.7			39.8	38.8	40.8
	26.8	23.1	23	24.5	23.7	24.1	20.8	22.4	24.9	26.8	24.6	26.5		42.3	42	38.8	43.2	49.9	50.5	49.8	51.1			28.6	36.5	31.9	33.5			38	35.4
12	26.2	22.5	23.8	26.1	24.6	24.5	22.6	23.8	25.9	26.8	25.5	27	12	43.8	44	40.8	45.7	52.3	53.7	52.2	51.7	12		26.3	34	33.3	31			35	31.6
	26.7	22.5	24.1	25.6	24	24.3	23.2	24.4	25.5	25.7	24.6	26		45.1	44.5	41.5	46.5	52.3	53.5	52.6	52			26.6	32.6	32.8	30.4			35.6	29
	25.7	22.2	24.6	25.3	23.3	23.8	22.8	24.2	25.4	25.9	24.6	26.5		45.8	45.1	42.9	45.9	52.7	55	53	53.7			26.5	32	32.3	29.3			34.9	27.2
13	26.7	23.5	24.7	25.8	23.8	23.8	22.7	23.9	25.1	25.7	25.4	26.9	13	46.9	46.5	43.7	44.9	53.7	55.8	54.1	53.7	13		26	31.4	32.1	28.6			34.8	25.6
	27.2	23.5	24.3	25.4	24	24.7	22.4	23.7	25.8	25.9	25.8	27.4		47	47.3	43.7	45.9	54.2	56.7	55.3	54.7			25.9	31.5	32.2	27.5			33.3	24.7
	27.2	23.4	25.2	26.3	24.1	24.7	23.3	24.2	26.3	25.7	25.5	27.1		48.4	47.6	45	47.1	54.8	57.8	56	54.6			25.8	30.6	32.1	27.3			32.7	24.8
14	27.3	23.6	24.3	26.2	24.7	24.8	24.2	25.1	26.3	25.6	25.5	27.5	14	49.4	47.6	46.5	49.1	56	59.5	56.2	55.3	14		26	30	31.4	26.8			32.3	25.4
	27.4	23.8	24.6	26	24.8	25	23.1	24.1	26.2	25.6	26.3	26.9		49.2	48.9	46.8	49.4	56.1	59.5	56.9	55.6			26.9	29.8	31.1	26.5			33	26.2
	27.1	23.9	25.5	25.6	25	24.5	22.4	23.6	26.5	26.3	26.8	28.2		50.6	51.4	47	48.9	56.2	60.8	57.6	56.3			27.6	29.3	31.1	26.5			33.3	27.1
15	27.7	24	24.4	26.1	24.4	25	23.1	24.7	26.9	26.6	26.5	28.6	15	50.4	50.9	48.1	51	57.2	61.4	58.7	57.2	15		27.6	29	30.7	26.2			33	27.5
	27.4	24.4	24.3	26.5	24.8	25.2	23.1	25.3	27.6	27.3	27.2	28.6		52.4	51.7	49.6	51.4	58.6	62.6	58.4	57.4			28.6	29.9	31.6	26.8			33.3	27.8
	28.3	24.7	24.2	26.6	25.4	25.4	23.6	25.8	27.5	27.3	27.4	29		53.5	53	51.2	52	58.8	63.5	58.8	58			26.9	29.7	31.7	27			33.6	29.1
16	28.3	24.6	24.3	27.3	25.5	25.7	24.1	26.4	27.7	27.4	27.3	28.8	16	52.9	53.9	51.7	54	57.7	63.7	59.1	58.8	16		27.5	29.5	32.8	26.8			32.8	28.7
	27.9	25		26.6	25.3	25	23.4	25.5	26.7	27.2	28	29.1		53.6		50.7	52.2	58.6	65.5	59.9	59.1			27	28.7	31.3	27.2			33.7	28.9
	27.7	24.9		26.8	25.7	24.6	24.2	26	26.8	27.4	27.7	29.3		53.9		51.4	53.5	59.8	66.3	59.3	59.8			27	29.1	32.8	27			33.7	29

## Sheet: Fig 1B
Weeks	Ubi males food intake (g/day), n = 12												Weeks	LepRNull male mice food intake (g/day), n = 9									Weeks	Ubi-LepRNull male mice food intake (g/day), n = 9
9	4.05	4	3.6	4.8	4.8	3.9	4.1	4	4.6	4.7	2.5	3.6	9	7.6	5.95	6.3	5.3	6	6.9	7.7	5.1	5.3	9	6.8	7.05	6.1	8.3	7	6.4	6.4	5.7	5.5
	7.2	4.1	4.15	3.9	3.6	2.9	3.2	3.3	3.5	3.9	2.8	3.3		6.5	6.55	5.6	4.6	5.5	5.6	5.6	5.3	5.1		6.9	7.95	4.6	7.2	6.8	5.5	6.5	5.8	5.4
	4.55	4	3.5	3.6	3.5	3.1	3.4	3.3	3.7	3.3	3.4	3.6		6.6	5.5	5.7	5	6	5	5.5	5.6	5.1		6.9	6.7	5.8	6.9	6.5	5.3	5.9	5.5	5.7
10	2.1	1.8	1.7	2	1.7	1.3	0.6	1.8	1.8	2.7	0.9	1.3	10	3.5	3.1	2.1	2.3	2.6	2.9	3.9	3.4	3.3	10	2.9	3.5	2.1	4.7	2.7	3	4.1	2.1	2.2
	4.2	2.5	2.6	2.8	2.8	2.9	0.5	3.8	3.6	3.5	1.2	2.6		2.9	4.6	3.2	3	3.2	3.1	3.5	3.3	3.3		2.7	3.9	2.8	4.2	3.4	1	3.5	2.6	2.7
	5.2	4.3	3.7	3.1	3.4	2.2	2.3	6.2	3.8	3.5	2	3.4		3	2.7	1.8	2.9	2.4	2.8	2	3.1	2.5		1.9	2.6	2.5	3.4	1.2	1.5	2.2	0.9	0.8
	4.6	7.2	4.1	4.3	4.2	3	4.4	6.7	4.5	2.2	1.8	3.2		1.8	2.9	1.3	3	2.7	1.4	1.8	3.2	2.5		1.2	1.5	1.9	0.4	0.2	0.4	1.4	0.4	0.5
	5.3	5.9	3.7	3.2	4.3	3.1	4.4	5.2	4.5	3.4	3.2	3.1		2.4	3.4	1.3	2.8	3.5	1.3	1.3	3	3		0	0.3	1.3	0.1	0	0.3	0.7	0.1	0
	6.4	4.6	5.65	4.7	5.6	4.1	3.7	9	5.5	7	3.6	3.8		4.6	4.65	1.1	2.9	3.9	3.2	3.1	4.1	3.4			0.25	0.9	1	0		0.6	0.1	0.1
11	5.5	4.1	4.9	5.3	4.8	5	4.3	7.7	4.8	5.3	3.7	4	11	3.7	5.8	0.7	4.4	3.9	4.1	5.5	4.4	4.2	11		0.2	0.6	0.6			0.4	0.1	0.3
	6.45	3.9	4.2	4.7	7.3	4.5	3.3	10	4.7	6.6	3.9	3.5		4.3	5.3	1	4	4.8	4.4	5	4.2	4.6			0.45	1.1	0.9			0.8	0.1
	4.93	4	4.07	4.2	7.9	2.8	4.6	7.4	4.5	5.3	3.6	3.1		4.7	6.43	0.9	4.5	5.7	5.4	5.7	4.4	5.9			0.63	2.8	1.2			1.2	0
12	4.8	3.8	4.3	4.4	4.5	4	4.4	6	5	6.7	3.2	3.4	12	5.6	5.95	1.7	5.6	6.9	7.7	8.4	5.2	5.9	12		1.45	3.2	2.3			3	0.1
	3.95	4	4.25	4.2	4.3	3.9	3.9	6.7	4.3	4.8	4	4.2		6.1	5.55	2	5.5	6	5.7	6.6	7.1	5.4			2	2.7	2.3			2.6	0.3
	4.13	3.9	4.67	4.5	6.8	4.1	5	6.2	4.6	4.1	3.1	3.6		4.6	5.87	2.9	6.2	4	5.8	5.4	5.8	5.6			2.33	3.5	1.9			2.4	0
13	4.4	4.3	5.5	4.6	5.8	4.4	5.2	5.1	5.5	4.8	3.9	3.7	13	5	9.1	3.7	6.9	7	6.2	6.9	7.1	6.2	13		3	3.8	2.2			2.9	0.9
	4.4	3.3	4.35	4	4.3	3.5	4.2	4	4.5	4.2	4.1	3.8		5.7	7.05	2.9	5.2	4.9	5.8	5.4	8	6.1			2.9	2.7	3			3	1.1
	3.73	3.1	4.67	3.6	4.2	3.5	4.6	4	4.1	4.2	3.7	3.9		5.2	7.27	2.8	5.8	5.5	5.6	6.8	6.5	5.7			3.97	2.9	2.9			3.3	1.5
																														4.3	2.6
14	4.55	3.7	5.1	4.8	5.3	4.8	4.3	4.9	5.2	4.6	4.5	3.7	14	6.7	6.8	4	6.7	6.7	6.2	7.4	6.2	6.6	14		3.7	4.5	4.1
																														4.2	3
	4.3	3.6	4.8	3.6	3.8	3.2	3.3	3.8	4.4	3.7	3.3	6.3		5.8	8.55	3.3	6.1	5.4	4.9	5.9	5.5	6.1			3.8	3.4	3.1
	3.9	3.8	4.57	4.3	4.2	3.5	4.3	3.9	4.4	4.1	2.8	3.9		5.8	8.07	3.5	5.8	5.4	5.8	6.5	5.9	5			4.67	3.5	3.5			3.1	2.7
15	4.05	3.5	3.85	4.5	3.9	3.8	3.8	4.4	5.1	4.5	3.4	3.5	15	6.6	6.95	4.3	6.1	5.6	5.5	4.5	6.1	5.4	15		4.85	3.8	4.9			4.1	2.9
	4.25	3.5	4.05	4.7	4.6	3.4	4	4.7	5.1	3.5	3.6	4.4		6.7	7.8	3.7	5.7	5.4	6.2	7.2	6.1	6.1			3.8	3.9	4.6			4.4	4.5
	4.17	3.9	3.77	4.1	3.9	3.6	3.4	4.3	4.5	3.8	3.3	3.7		6.2	10.17	3.8	5.6	5.6	5.4	6.1	6.7	5.3			3.9	4.6	4.6			3.5	3
16	4.85	3.4		5.5	5.2	4.2	4.3	5.5	4.6	3.6	4.1	3.2	16	6.1		4.9	6.9	6.6	4.1	6.4	5.7	6	16		5.05	4.3	4.5			4.8	3.2
	3.7	3.5		4	4.3	3.8	4.3	4.8	4.9	5.5	2.9	3.7		5.5		4.75	6.05	6	6.8	7.5	3.4	4.4			4.35	4.6				3.7	3.3
	4.03	3.6		4.13	3.4	3.37	3.83	3.8	4.53	3.9	3.1	4.4		5.8		4.03	5.4	5.1	5.8	6	6.9	4.8			4.3	4.17	3.2			3.8	4.1

## Sheet: Fig 1C
Weeks	Ubi females body weight (g), n = 12																		Weeks	LepRNull female mice body weight (g), n = 4				Weeks	Ubi-LepRNull female mice body weight (g), n = 7
9	19	18.4	18.4	18.5	17.9	23.6	18.5	19.8	17.5	19	20.1	22.4	20.4	19.8	21.5	21.1	17.9	20.2	9	39	37.2	51	47.4	9	38.6	42.2	54.3	47.5	49.6	52.3	37.3
	19.8	18.6	18.4	19.3	18.6	23.8	18.7	19.9	16.9	20	19.7	23	20.6	19.3	21.7	21.1	17.6	19.6		40	37.6	51.5	47.9		39.8	42.4	53.9	48.1	50.7	51.7	37
	19	18.6	18.6	19	18.5	23.5	18.8	20.2	17.7	19.1	20.6	23.4	20.5	20	22.3	21.5	17.8	20.5		40.6	38.4	52.9	48.1		40.3	42.1	54.1	48.3	51.3	53.3	37.5
10	19.1	19.8	18.4	19.4	19.1	24.1	19	20.5	17.5	19.1	20.8	24.3	21	20.6	22.4	21.1	18	20.1	10	43	39.7	53.2	49.2	10	42.1	42.5	54.4	50.4	53.4	54.7	37.9
	17.4	19.1	17.3	18.2	17.7	24.7	19.3	20.8	16.3	17.2	19.6	22.6	19.9	19.3	20.6	19.7	16.8	18.8		42	38.5	51	47.2		39.1	42.3	53.1	47.6	50.7	53.1	36
	16.1	19.2	16.4	18.9	18.2	24.2	19.4	20.9	16.6	17.7	19.5	22.8	19.3	19	20.3	20.1	17	18.8		41.6	37.8	51.1	46.8		39.6	40.8	51.7	47	50.3	51.8	35
	17	19.8	16.8	19.5	18.5	24.4	19.3	20.8	17.4	18.5	20	22.5	20.1	18.9	20.2	20.8	17.2	19.1		41.7	38	50.3	45.9		38.7	38.7	50.2	45.9	49.1	50	34.3
	17.2	19.5	17.5	20.4	19.1	24.7	19.7	21.2	17.3	18	19.9	23.2	20.3	19.2	21.1	21.8	17.7	19.8		41.4	37.1	50.7	45.4		37.5	36.5	48.7	44.5	47.8	49	32.5
	18	19.2	18.5	19.8	18.6	25.2	19.7	21.1	17.6	18	19.8	23.5	20.3	19.3	21.2	21.3	17.5	18.9		41.4	37.5	50.1	44.5		36.4	33.4	46	42.9	45.7	47.3	31
11	18.8	20.1	19.8	20.8	19.7	25.3	20	21.6	18	18.3	20.3	24.4	22.1	20.5	22.7	22.1		19.2	11	41.6	37.1	50.3	43.9	11	34.6	31.9			41.8
	19.8	20.7	20.6	20.8	19.9	25.8	20.6	21.9	18.8	19.4	21.7	25	23.1	21.8	23.8	22.5		20.2		42.2	37.9	51.1	43.6		31.4	31.1			37.7
	20.8	21.1	21	20.6	19.4	25.8	20.6	22	18.5	19.5	22.1	25	22.6	22.1	23.9	22.6		21.2		43	37.9	51.5	44.6		29	29.9
12	20.7	20	21.2	21.5	20.5	25.5	20.6	22.3	19.4	20.5	23	25.6	23.2	23.6	24.6	22.9			12	44.9	40.4	54	46.6	12	27.8	28.9
	21.1	20.1	21.4	21.8	21.2	25.9	21.2	22.5	19.7	20.7	22.5	24.9	23.1	22.2	24.5	23				45.6	41	54.1	46.8		26.8	28.7
	21	20	21.4	22.3	21.3	25.9	20.8	22.4	19.7	20.6	22.1	25.5	22.6	23	23.8	23.6				46.4	41.6	55.3	47.4		26	27.9
13	21.7	21.3	21.6	22.7	22.1	26.4	20.9	21.9	19.7	20.1	21.6	24.8	22.8	22.5	23.9	23.1			13	47.6	43.2		48.7	13	25.7	27.6
	22.1	21.5	21.4	22.6	22.1	26.4	21.1	22.1	19.6	20.2	21.2	25.1	22.6	22.3	24.4	23.4				47.6	44.5	56.8	49.6		24.9	27.7
	22.3	22.1	21.9	22.9	23.2	26.7	21.3	22.1	20.1	20.6	22	25.3	22.7	22.9	24.7	22.7				48.6	45.4	57.7	49.8		24.6	27.6
14	21.4	22	21.9	22.4	22.1	26.6	21.4	22.4	20.1	20.6	22.6	25.8	23.3	22.3	24.1	22.7			14	48.6	46.5	58.4	50.9	14	24.5	27.2
	21.5	22.2	21.3	24.3	22.4	27.2	21.5	22.4	19.7	20.4	22	25.6	22.2	22	23.7	23.1				49.9	46.7	58	52.2		23.8	27.6
	21.1	21	21.8	23.3	22.9				18.9	19.4	21.5	26	22.8	22.2	24.6	22.8				51.9	46.2	58.5	52.5		24	28
15	21.4	21.1	21.2	22.7	21.4	26.6	21.6	22.3	19.8	19.9	21.1	25.7	22.5	22.3	25.1	23			15	51.6	46.5	59.3	53	15	23.4	28.4
	21.4	21.2	21.5	22.7	21.9	26.5	21.4	22.7	19.7	19.9	21.8	26.3	22.7	22.5	24.3	22.5				52.3	48.3	61.3	53.1		23.8	28.8
	21.5	22	22.1	23.1	21.5	26.3	21.6	22	20.2	19.9	21.7	26.4	22.5	22.9	24.5	22.7				53.5	49.1	61.2	53.5		23.6	28.1
16	22.3	22.2	21.9	23.2	22	26.1	22	21.5	21.1	21.4	21.6	25.7	23	22.5	24.2	22.9			16	54.6	50.3	60.8	53.4	16	23.6	28.3
	22.4	22.4	22.2			26.3	22	21.5	20.4	20.4	21.6	25.5	23	23	25.1	22.8					49.4	62	53.9		23.1	26.9
	22.5	23	22.6			26.5	22.1	21.6	20.7	20	21.8	25.2	23.1	23	25	23					50.3	62.8	53.8		23.7	27

## Sheet: Fig 1D
Weeks	Ubi females food intake (g/day), n = 15															Weeks	LepRNull female mice food intake (g/day), n = 4				Weeks	Ubi-LepRNull female mice food intake (g/day), n = 6
9	3.25	4.38	3.4	4.55	3.95	3.5	4.7	3.8	5.6	4.3	4.5	5.8	3.8	2.4	2.7	9	5.5	5.5	7.5	4.6	9	6.2	6.9	4.4	5.2	4.2	6.3
	4.81	5.74	3.6	5.35	4.6	3.1	3.3	3.5	4.3	3.1	4	4.5	3.9	2.7	3.3		5.75	5.2	5.8	4.6		8.02	6.3	4.1	4.6	4.8	6.4
	3.4	4.51	3.9	3.4	4.4	2.7	3.4	3.5	3.9	2.9	3.7	3.5	3.8	2.7	3		6	6.4	5	5.2		6.78	5.9	3.3	5	5.3	7
10	0.4	2.1	1	1.9	1.3	0.9	0.4	1.3	2.6	2.4	2	1.9	1.8	1.2	1.3	10	3.1	1.2	2.9	2	10	0.9	3.3	3.7	3.1	1.8	2
	0.6	3.3	0.3	5.5	4	2.7	3.5	2.7	3.8	2.6	2.9	2.6	3	1.8	2.1		3.8	2.7	4.5	3.2		3.5	3.2	0.5	2.2	2	2.4
	2.5	4.1	2.2	6.5	7.9	2.8	6.7	3.1	4.2	3.4	2.9	6.2	3.6	2.4	3		3.7	3.4	3.4	2.5		2.2	1.5	1	0.6	0.9	1.8
	3.3	4	4.4	6	5.6	3.7	8.6	3.6	4.2	1.5	3	5.2	3.7	2.4	5.1		3.1	3	3	1.8		1	0.2	0.8	0.2	0.5	0.6
	4	3.7	4.2	8	3.4	3.2	5.1	3.2	5.2	1.5	3.1	3.3	4.5	3.2	6.5		2.7	3.2	3	2.8		0.5	0	0.7	0.3	0	0.3
	4.8	5.6	5	8	7.85	3.8	6.1	5.1	6.2	3.8	4.8	6.5	4.2	3.5	0.6		3.35	2.8	5.2	4.9		0.3		0.5			0.1
11	4.15	5.85	4.6	5.2	7.2	3.3	4.4	3.2	6.4	4	5.2	5.1	4.2	3.8	5.7	11	4.15	3.8	6.1	5.7	11	0.2					0.1
	4.15	6.2	4.1	5.55	2.6	2.8	7.4	4.9	4.5	3.1	4.2	4.2	3.8	4	4.1		5.75	3.4	4.1	4.5		0.55
	3.87	6.03	3.8	5.67	3.03	3.3	5.9	3.5	5.7	3.2	4.1	4.7	4.1				4.87	5.1	6.6	5		1.57
12	3.4	4.3	3.8	8	3.5	3.3	6.1	4	5.8	4	3.9	7.5	3.5			12	5.15	5.7	9.5	5.1	12	1.15
	4.1	5.1	5.1	6.7	4.35	3.3	8.5	3.4	5.3	3.2	4.3	4.4	3.7				5.5	5.5	7	4.9		1.8
	3.6	3.7	3.6	5.3	4.67	3.7	6.5	4.2	4.2	3.1	3.3	4.2	3.6				5.23	6.8	6	5.8		1.77
13	4.2	4.65	3.9	5.75	6	3.9	8	4.2	5.8	2.9	3.9	4.8	4			13	5.45	7.5	6.9	5.8	13	2.2
	4.65	4.75	4.4	6.5	7.6	3.4	5.7	3.6	4.7	3	3.4	5.1	3.6				5.25	5.7	6.2	5.7		2.35
	3.3	4.83	4.5	6.4	6.3	2.7	5.7	3.8	4.6	3.3	3.4	4.6	3.8				5.67	6.5	6.2	6.1		2.6
14	3.85	5.1	4.5	9.9	6.15	4.1	6	4.5	4.4	3.4	4	4.4	3.6			14	4.75	6	6.8	6.4	14	3.05
	4.05	4.5	3.7	7.7	5.8	2.7	4	3.1	3.6	2.9	2.8	4.6	5				6.6	5.7	4.7	5.2		3.5
	3.1	3.9	3.6	7.17	4.87	3.1	6.1	3.4	5	3.5	3.2	3.9	3.3				6.17	5.4	7	4.8		3
15	3.3	4.25	3.9	5.8	4.2	3	5.3	4.4	4.1	3	3.4	4.8	3.4			15	5.3	6.8	6.3	5.1	15	3.45
	2.95	4.05	4.8	5.8	4.4	3.3	4	3.7	4.8	2.9	4.9	3.8	3.7				5.7	6.3	7.1	5.9		3.3
	3.6	4.13	4.8	5.2	4.13	3.5	5.6	3.3	4.5	3.5	3.7	4.2	3.6				6.13	6.1	5.6	5.2		3.37
16	3.45	4.9	3.6			4.2	4.5	4.6	3.9	2.8	3.3	4.3	3.6			16		7.6	5.7	4.9	16	3.6
	3.3	4.15	4.15			3.7	3.6	4.1	3.1	5	4.7	7.5	3.2					6.1	8.9	5		3.5
	3.73	3.93	4.2			3.07	3.03	3.57	4.8	3.3	3.7	3.7	3.4					5.53	5.7	5.4		3.77

## Sheet: Fig 1K
Number of pSTAT3 ir cells
ARHvm				ARHl				VMH				DMH				PMv
Ubi	LepRNull	Ubi-LepRNull		Ubi	LepRNull	Ubi-LepRNull		Ubi	LepRNull	Ubi-LepRNull		Ubi	LepRNull	Ubi-LepRNull		Ubi	LepRNull	Ubi-LepRNull
79	7	71		42	1	59		290	1	283		263	10	209		279	3	162
75	2	106		79	1	75		436	3	377		250	1	252		253	0	293
88	0	88		99	0	102		368	1	376		284	5	248		315	5	262
60	1	56		75	0	51		365	3	234		299	10	232		198	5	127
76	0	79		70	0	67		495	7	431		354	5	340		244	0	222
								409	0			314	4			365	0

## Sheet: Fig 1L
Acute leptin responsiveness test
Decrease in food intake (% decrease compared to PBS injection)							Decrease in body weight (% decrease compared to PBS injection)
Ubi	LepRNull	Ubi-LepRNull					Ubi	LepRNull	Ubi-LepRNull
-16.6	-3.9	-18.1					-1.29	0.27	-0.93
-29.9	-8.8	-20.4					-0.86	0.12	-0.87
-6.9	-6.2	-17.9					-0.77	-0.76	-0.2
-6.6	-13	-22.5					-0.01	-0.12	-1.2
-18.9	-7.40741	-12.5					-0.1	-0.6	-0.4
-25.7	33.3333	-29.4118					-0.4	0.1	-0.4
-18.4	-5.88235	-13.1579					-0.2	1	0
-14.3	14	-16.6667					-1	0.5	-0.2
-5.71429		-17.6471					0.3		-0.9
0		6.25					0		-0.2
0							0.1
-27.027							-0.7
2.7027							-0.5
3.0303							-0.2
-12.1212							-0.7
0							-0.6
2.85714							-0.4
2.27273							-0.9
-15.7895
