# Supplementary material for: Long-term consequences of the absence of leptin signaling in early life
Source: eLife. 2019 Jan 29;8:e40970. doi: 10.7554/eLife.40970 (PMC6384028; doi:10.7554/eLife.40970)
Supplement: Figure 2—figure supplement 1—source data 1. [file elife-40970-fig2-figsupp1-data1.xlsx]

## Sheet: Fig S1A
Body weight (g) of adult female mice
Ubi	LepRNull	Ubi-LepRNull
21.92	53	23.53
21.98	48.98	27.92
21.92	61.23	26
22.93	53.45	33.1
21.7	65.1	25
26.38	53.6	28.4
21.78	60.7	23.5
21.93	63.2	26.4
20.32	61.7	21
20.25	61.1
21.6	61.6
25.8	59
22.8	61.2
22.7	53.2
24.7
22.82
22.7
23
23.7
22.1
23.1
22.7
23.1
22.5
21.4
22.5
22.5
23
24.1
24.3
22.9
23.2
21.2

## Sheet: Fig S1B
Adiposity of adult female mice
Subcutaneous depot				Perigonadal depot				Periovarian depot				Retroperitoneal depot
Ubi	LepRNull	Ubi-LepRNull		Ubi	LepRNull	Ubi-LepRNull		Ubi	LepRNull	Ubi-LepRNull		Ubi	LepRNull	Ubi-LepRNull
0.755907	2.53628	0.536293		1.05928	3.64713	0.729537		0.211814	0.568372	0.054054		0.199578	0.436279	0.065058
0.646491	2.5344	1.73352		0.663377	2.84338	3.19834		0.14057	0.454202	0.298338		0.153728	1.05612	0.680886
0.792788	2.38011	0.720816		0.964423	2.67127	1.21775		0.04399	0.612293	0.256327		0.160577	0.677348	0.143673
0.700196	2.6279	0.765036		1.00372	3.42942	1.3558		0.207059	0.801715	0.267391		0.197647	0.348021	0.162862
0.520468	2.3977	0.623214		0.816689	2.55496	0.874206		0.083446	0.914727	0.178571		0.181511	0.360057	0.126984
0.636731	1.94056	0.519922		0.878654	4.09767	1.02266		0.206538	0.751265	0.089258		0.214808	0.575778	0.091211
0.358794	2.27421	0.844632		0.283166	4.16215	1.70751		0.104523	0.543398	0.293865		0.110553	0.638204	0.303834
0.616019	2.22529	0.412445		0.423301	3.04171	0.49476		0.184466	0.332753	0.108734		0.190291	0.470066	0.074454
0.728604	1.90282			0.986036	2.8531			0.122973	0.959745			0.221396	0.351184
0.752532	2.60937			1.01329	4.07586			0.134599	0.813943			0.156118	0.494753
0.505111	2.23797			0.745333	3.89463			0.070444	0.971382			0.122889	0.581545
0.626563	2.07667			0.906027	4.19114			0.103571	0.768947			0.137054	0.571754
0.530095	2.10288			0.646445	3.51099			0.090047	0.914572			0.128199	0.686475
0.559914	2.78031			0.816595	3.5955			0.135345	0.748217			0.112931	0.666357
0.651957	2.53058			0.801739	3.69218			0.150652	0.882464			0.110435	0.566097
0.44898	1.98943			0.84898	3.80108			0.175306	0.933873			0.099388	0.387346
0.4795	2.58455			0.54725	4.00908			0.13525	0.789331			0.06975	0.674443
0.754198	2.84302			1.59809	4.4246			0.441412	0.989714			0.33626	0.934884
0.677948	2.37514			1.37729	3.24537			0.257642	0.968305			0.258079	0.541382
0.575	2.77577			0.9375	3.69676			0.243864	1.33056			0.212273	0.707879
0.764391				1.86808				0.311624				0.284871
0.572381				0.879286				0.176429				0.190952
0.488409				0.792045				0.174773				0.191818
0.419565				0.857609				0.075				0.095435
0.587764				1.36224				0.057173				0.237764
0.449145				0.943803				0.104274				0.105983
0.21729				0.241589				0.043224				0.035748
0.407576				0.605195				0.047186				0.092424
0.553191				0.964043				0.17766				0.149149
0.618802				1.3343				0.136983				0.25062
0.556222				1.28444				0.119778				0.173111
0.601042				0.731458				0.1475				0.121875
0.735965				1.15				0.171491				0.840351
0.550917				0.882798				0.134404				0.120413
0.497418				0.789202				0.048826				0.073239
0.5673				0.98038				0.166034				0.127215
0.445642				0.948624				0.102294				0.102294
0.583482				1.04821				0.143973				0.147991
0.485039				0.883661				0.213583				0.125197
0.577941				1.03842				0.240809				0.154228
0.53502				0.830972				0.153846				0.138664
0.509221				0.967008				0.180123				0.167418
0.540393				0.839738				0.163974				0.144541
0.498745				0.702929				0.161088				0.12887
0.555303				0.857955				0.198864				0.182008

## Sheet: Fig S1C
Serum leptin concentration (ng/ml) fo adult female mice
Ubi	LepRNull	Ubi-LepRNull
5.758	198.76	0.216
3.524	231.86	4.932
3.544	73.68	23.66
1.6	207.32	3.06
3.036	187.98	0.4
6.202	183.86	1.076
2.718	193.98	6.832
1.184	88.54	0.4
7.243	248.82
7.9	141.3
4.794	119.22
4.375	192.98
5.215	199.8
4.183	129.16
1.207	252.7
3.359
2.601
3.568
2.323
5.613
1.953
6.456
7.566
7.876
10.218
6.174

## Sheet: Fig S1D
Daily food intake (g)
Ubi	LepRNull	Ubi-LepRNull
3.39	5.71	3.5
4.24	6.405	4.5
4.24	6.55	4.5
5.6	5.25	2.5
4.24	4.9	3.7
3.46	5.4	2.4
4.34	6	3.1
3.95	5.3	3.8
4.2	4.3
3.42	5.7
3.95	4
4.72	3.9
3.48	3.2
3.6	5.1
3.6
3.9
3.6
4.7
3.1
3.5
2.9
3.3
2.3
2.9
3.4
3.5
3.6
4.2
3.5
3.4

## Sheet: Fig S1E
Mean VO2 consumption of adult female mice
Dark phase				Light phase				24h
Ubi	LepRNull	Ubi-LepRNull		Ubi	LepRNull	Ubi-LepRNull		Ubi	LepRNull	Ubi-LepRNull
3823.47	1749.11	3259.78		3235.36	1514.47	2813.97		3457.39	1617.9	3040.75
3549.76	1288.68	3276.16		3022.91	1200.67	2896.02		3257.85	1217.31	3088.53
3657.21	1796.61	3177.04		3252.69	1680.5	2555.2		3424.82	1729.92	2859.45
3692.11	1946.23	3146.09		3244.85	1834.97	2768.86		3459.85	1886.62	2953.5
3240.39	1872.07	2906.39		2947.72	1721.92	2541.57		3096.23	1794.99	2708.88
3356.51	2023.21			2991.76	1822.65			3177.78	1918.98
3502.43	1502.58			3094.26	1224.12			3247.5	1345.65
5562.49				4692.41				5135.2
3237.9				2829.83				3053.24
2878.34				2652.96				2783.45
3230.86				2612.51				2877.62
3220.89				2478.06				2846.53

## Sheet: Fig S1F
VO2 consumption of adult female mice
Time of day	Ubi												Time of day	LepRNull							Time of day	Ubi-LepRNull
18h	4040	3615	3209	3172	3692	3511	3090	3638	2558	2379	2491	4018	18h	1500	1523	1458	2594	1365	1654	1154	18h	2661	4045	2367	2569	2370
	3308	2657	2817	3716	3625	3294	2973	5139	2870	2660	2374	3572		1304	1075	2164	1812	1622	1721	1164		2204	2520	3300	3139	2211
	3222	2731	3086	2958	2717	3446	3414	5049	2677	3189	2524	3672		1486	1330	1377	1331	2259	1842	1934		2390	2487	2243	3092	3299
	3763	3745	4024	3019	2738	3360	3795	5001	2700	2331	2511	3573		1543	1461	1465	1688	2330	2159	1220		2585	2870	2267	2574	3119
	3540	2730	3103	3151	3063	2783	3240	5471	2466	2257	3459	2068		1971	1665	1584	2306	1547	2411	1813		2589	2626	3394	2805	2311
	3432	2746	3112	3468	2985	2888	2949	4054	3286	2366	3085	2028		2306	1293	1917	1771	1369	1641	1350		3533	3382	2378	2695	2394
20h	3818	3982	3380	3320	2960	2838	3911	5025	2628	3042	2425	3111	20h	1496	1412	2214	1561	2217	1851	1319	20h	2482	3468	2443	2803	2369
	4237	2866	4003	4174	3326	2790	4042	5891	2859	3547	2461	2141		1523	2018	1751	2442	2298	1895	1324		2885	2892	3488	3685	3434
	3613	4136	4016	3644	3643	4349	3574	5981	3645	2349	2535	2347		1936	1571	2169	2523	1523	2413	1664		3554	3120	3666	3790	3070
	4349	4202	4302	4139	2826	4415	3165	5035	2980	2605	3746	3363		2236	1869	1464	2318	2278	2413	1717		3811	3631	3705	3822	3325
	3273	4138	3172	4168	3999	3923	4575	6045	2488	3843	3819	3664		1730	1204	2262	1775	2434	1878	1418		2407	3006	3440	3014	2814
	4448	3602	3151	3932	3755	4157	4108	5790	3674	3048	2400	3873		1468	1834	1711	2561	1554	1597	1876		3730	2484	2618	3501	2439
	4243	2840	4214	3186	2927	3349	3138	5645	3897	2508	2288	3945		1405	1177	1429	2429	1450	1778	1646		2414	2677	4063	2536	3418
	3839	4075	3021	2906	3170	2664	3186	3980	3119	2219	3878	3749		2163	1300	2166	2132	2492	1907	1551		3418	2684	2791	2508	3426
	3726	4139	4239	3699	2829	3539	3743	4471	2608	2269	4124	2582		2502	1817	2263	1625	2396	1854	1402		2715	3693	2309	3588	3353
	3854	2714	4180	4447	3807	3772	3551	5904	2839	2413	3906	2155		1676	1303	1476	1675	1496	2005	1303		2713	3644	4005	3794	2143
	3531	3108	3873	3995	3253	2809	3997	5762	2613	3325	2589	3823		1453	1456	1633	1467	1478	2443	1758		3851	2315	3982	3286	2458
	4460	4252	3268	3706	2841	2590	4344	5691	3109	3591	2604	3891		2482	1506	1433	1403	2389	2576	2214		3013	2553	3860	2598	3182
	3931	4053	3476	2767	2619	4047	3653	5948	3545	3689	3614	3866		2423	1248	2378	1931	1392	1653	1387		2590	3767	2592	2927	3399
	3803	3596	4280	3042	4133	4182	4122	5059	3415	2884	4143	4117		2401	1389	2376	2241	2270	1618	1348		4003	3885	3795	2371	3429
	3556	2902	3354	3153	3972	3605	4025	5763	2471	2197	4021	3755		2156	1439	1632	1473	2356	2416	1517		3453	2299	4030	3891	2258
	3783	4058	4284	4265	3954	2290	3884	6247	3860	2155	3437	3143		1580	1382	1020	1346	2210	2473	2164		2537	2776	4038	3702	2429
	4090	4488	3089	3983	3654	2614	3377	5017	3590	2194	2435	2262		1288	1409	1368	1428	1395	2400	1563		3374	2316	3830	3956	2461
	4557	4409	2884	4133	2614	2890	3479	4798	3770	2231	3882	2917		2193	1851	1827	1822	1396	1599	1304		2606	4226	3920	2525	2394
	4933	4174	3242	3035	2535	3975	4421	5577	3814	3360	2875	4067		1427	1201	2251	2219	1755	1437	1543		2456	3765	2758	3476	3308
	4794	4187	3174	2997	2696	3970	4273	5644	3028	3122	2564	4032		1298	1124	1510	2290	2292	1656	1755		4069	3733	2458	2212	3588
	4663	4088	3371	3598	3370	2960	3878	6438	2616	3450	2467	4022		1378	1249	1390	1599	2279	1750	2038		4079	2452	3145	2689	3031
	4927	3070	4226	4081	2664	2775	4016	5598	2690	3203	3459	2653		1521	1681	1540	1380	1493	1678	2150		3653	2569	2279	2430	2013
	4890	4272	4198	3054	2649	2564	3387	5466	2412	3319	3980	2276		2332	1331	1442	1538	1404	1690	1528		2403	2744	2404	2363	2343
	4253	3808	3287	3140	2773	2374	4003	5893	2571	2022	4050	2347		2258	1423	1512	2266	1236	2445	1241		2495	2660	2476	3447	2519
	4823	3225	3422	3326	2472	3257	3944	5623	2554	2147	3960	2300		1436	1399	1995	1571	2331	2524	1151		2347	3981	3206	3098	3419
	5032	2938	3638	4072	3630	2940	2915	4049	2581	2054	3910	2115		1414	1505	2434	1350	2276	1861	1042		2623	3148	3574	3034	3349
	5012	3856	3322	3758	2559	2791	3469	5881	3301	2063	3913	2295		1632	1992	1755	2267	1766	1446	1380		2794	2762	2621	3317	3317
	4748	3052	3433	4213	2461	4287	4194	3966	3090	2234	2510	2733		2280	1231	1456	2422	1410	1911	1526		4016	2510	2403	3107	2194
	4320	2917	4227	4342	3641	2749	3366	4012	3374	2984	2500	3767		2227	1339	1597	1756	2174	2485	1513		2868	3405	2441	3230	2385
	4665	4024	4663	3915	2496	2761	3269	5757	2633	2398	4000	3507		1443	1307	2434	1565	2408	2058	1277		2934	4017	2190	3860	2339
	4002	3060	4456	4031	2299	3940	3517	5202	2640	2287	3885	2858		1533	2027	1636	2145	1847	2636	1208		2766	3995	3615	3792	2376
	4753	4314	4456	3809	3693	3934	3613	5352	2803	2318	4064	3222		1879	2068	1445	2594	1341	1693	1632		3655	2550	3196	4009	3748
	4863	3095	4475	4302	3419	3979	4432	6019	2553	3249	4254	2864		2284	1140	1803	2488	1326	1617	1775		3874	4396	3586	3799	3730
	4709	3775	4496	4144	3668	3996	4102	5724	3557	2677	4089	3660		1635	1284	2237	2657	2346	2755	1984		4110	4132	3798	3831	3738
	3807	4101	4668	3799	3859	3969	4425	6419	3812	3372	4205	3014		1599	1638	2479	2388	2155	2681	1425		2584	4015	2859	2425	3565
	4527	3990	4285	4281	3445	3110	4341	5529	3887	2189	4190	3682		2381	1002	2464	2306	1377	2652	1971		4016	4116	3704	3565	3729
	4084	4242	3169	4310	3687	3551	3989	6002	3769	1909	4161	3875		2398	1319	2144	2314	2383	2256	1816		4064	4046	3490	3594	3690
	3809	2866	4610	3601	3875	3816	4041	5876	2505	2997	4250	3804		2258	1425	1583	2412	2358	2493	1832		4147	4045	3696	2203	3346
	3676	3951	4289	3904	3586	2704	3363	6402	3833	3820	4223	3826		1413	980	1948	1708	1280	1619	1923		4018	3349	3261	2176	3467
	3824	4262	4228	3383	3336	2161	3467	6157	3734	3577	3995	3920		1161	1264	2310	1417	1104	1765	2165		3934	2635	2949	2844	2886
8h	3809	2990	3180	3744	3690	2684	3293	5956	4101	3305	3951	3683	8h	1238	1320	1461	1559	2128	1466	2010	8h	3775	2744	2390	2364	1978
	3889	2931	3361	3367	3350	3597	3721	4239	3909	3489	3715	3662		1437	1214	1340	1909	1245	1683	1304		2982	2898	2304	3841	2276
	3801	2826	4508	3303	2704	3670	3846	5390	3549	3649	3749	3331		1462	1165	1388	1916	1224	2025	1133		2325	3799	3245	3383	3567
	3807	3533	3077	3966	3087	3355	3189	3599	3045	3356	3795	2527		1886	1262	1851	2296	2045	1877	1187		2463	2574	3476	3086	3517
	3605	3607	3276	3565	2688	2932	2951	5281	2500	3397	3647	2046		2191	921	1214	1667	2097	2423	1178		2611	2919	2417	2151	3046
	3992	3687	3054	3190	3292	2615	3523	4442	2493	3428	3016	2100		1937	1142	1842	1220	1073	1928	1078		2624	2417	2463	2523	2087
	3829	2852	3868	3571	2686	2568	3155	5765	3130	3188	2443	2306		1136	1379	2245	1426	1121	1450	1022		3062	2738	2455	2321	2197
	3813	2862	2942	3033	2838	2699	3191	5348	3387	2997	2702	2140		1136	1592	1516	1815	2142	1532	975		3809	2668	2512	2374	2507
	3563	2856	3272	3508	2653	2345	3931	5485	3610	2783	2526	2246		1217	979	1483	2228	2356	1593	1477		3099	4053	3635	2450	3316
	3395	3687	3868	2850	3411	2741	2847	4682	3460	2054	4229	2179		2150	986	1566	2110	1334	1873	1389		2626	3914	1939	2374	3245
	2988	2562	3145	2692	3494	3101	2623	3962	3310	2030	3697	3561		1969	1501	1477	2040	1317	2104	1858		2335	2769	2314	3308	2257
	3263	2764	3897	3996	3290	3421	3036	5229	2300	2119	2463	3014		1154	1227	1281	1446	1305	1709	1129		3314	2715	2548	2255	2411
	3963	2887	3166	3044	2778	2721	4047	4768	2552	2241	2606	2188		1197	1248	1386	1937	2510	1487	1005		2500	2649	3274	2461	2216
	2884	3161	3464	3197	2780	2602	2591	4009	2917	2922	2649	2145		1304	1186	2078	2436	2212	1719	936		2308	3134	3170	2541	2455
	3051	3817	3064	3713	3052	2703	2700	3625	2285	2912	2485	2474		1802	1525	1586	1900	1138	1968	810		2743	2733	2513	2318	2328
	4500	3372	3632	3773	3833	2587	2987	5407	2987	2967	2380	2069		1618	877	1455	1402	1300	2116	733		2726	2605	2392	3038	3380
	4151	2821	4240	3222	3720	3307	3342	4158	2783	2021	3276	2406		1052	1116	1617	1495	1360	1498	1385		2696	2871	2368	2183	3084
	3025	3143	3608	3053	3374	2649	2765	5248	2580	2158	2363	2080		1335	1579	1690	2051	1950	1578	1164		2816	3670	2689	3641	2180
	3193	2742	3283	2991	2593	2886	2804	3921	2365	2090	2757	2035		1339	1213	2101	1559	2266	1710	944		3727	3440	2369	2211	2346
	3087	2664	3464	3468	2534	2478	3712	4003	2327	2214	2470	2167		2251	1391	1544	1439	1222	1840	1123		2360	2580	2759	2433	2157
	3072	2581	3085	3001	2451	2740	3469	3917	2294	2178	2459	3212		2038	1378	1440	1566	1691	2140	1556		2627	2619	2178	2390	3119
	3054	3801	3107	2841	2467	2575	2761	3221	2308	2124	2359	3156		1500	1496	1500	2082	2316	2070	1537		2582	2738	2165	2414	2181
	2946	2450	2982	2824	2592	2674	2905	3383	3453	2126	2909	3060		1187	1095	1517	1732	1660	2168	1216		3332	2723	2113	3979	2254
	4229	2793	3090	3015	2782	2546	2847	3596	2293	3217	2244	1914		1435	1225	2399	1484	1377	1588	1184		3371	2744	3207	3004	2283
	2661	2556	3724	3545	2668	3937	2750	3429	2277	3333	2351	2893		1345	988	1670	1709	1427	1583	1155		2526	2769	3041	2535	3372
	2962	3496	3070	3073	2645	3579	2770	3684	3753	3081	3217	3073		1561	1280	1574	2267	1394	1851	1871		2509	3667	2341	3077	2923
	2952	2681	2898	3223	3383	3241	3233	3306	3322	2441	3046	2906		1906	1071	1510	1509	2118	1810	2124		2530	2528	2293	2580	1915
	3687	2692	4176	2858	2816	2905	2972	5109	2983	2210	2352	1802		1243	1127	1651	1534	1509	1837	1761		2381	2550	2374	3469	2132
	3979	2653	3280	2602	2516	2778	2734	5550	2290	2039	2143	2115		1409	1181	1529	1671	1424	1565	935		3484	2489	2313	3598	2147
	3116	2512	2863	4162	3266	2830	2920	3567	2418	2312	2285	2084		1392	1661	1566	2047	1691	1879	1270		2215	2437	2221	2180	2570
	3032	2660	2848	4064	3428	2592	2861	3895	3060	2201	2203	3283		1357	1139	1975	1569	2358	1659	1380		2430	3616	2210	2487	3095
	2943	3534	3133	2999	2703	3704	3791	3646	3653	2418	2344	3053		2056	1349	2230	1627	1885	2308	851		2690	2441	3238	2437	2069
	2760	3478	4309	2752	2902	3426	3615	3844	3551	2449	2258	2153		2190	1204	1605	1584	1176	1887	1178		3450	2597	2380	2305	2223
	3744	2636	4125	2834	3393	2935	2771	3504	2491	3321	2254	1920		1842	1265	1459	2221	1981	2350	1117		2531	2756	2378	3101	2157
	3057	2707	3110	2775	3024	2598	2965	5611	2417	3339	2212	2035		2187	1384	1559	2413	2075	1499	937		2663	2635	2391	2940	2296
	3106	2598	3107	3326	2456	2863	2965	5536	2318	2314	2069	2180		1613	1557	1639	2035	1396	1553	2077		2850	2287	2593	3445	2183
	2904	3614	2888	2925	2657	3732	3288	5868	2320	2185	3908	3285		1212	1216	1979	2430	1440	1750	1459		2466	3841	3477	2520	2042
	3918	3418	3130	2793	3500	3592	2918	4465	2326	2250	3716	2532		1314	1424	2256	2212	1740	1876	1227		2431	2770	2578	3159	2945
	3999	3333	3783	4118	2664	2714	3587	6113	3129	2339	2292	1971		1732	1874	1512	2253	2409	1894	1123		2513	2712	2830	2490	2659
	3271	4573	3383	3077	2752	3013	2770	5736	2618	2232	2252	2214		1535	1185	2350	1327	1506	2245	1414		2688	2548	2967	2780	2102
20h	3989	3482	3380	4248	3765	3708	4301	4590	2556	3175	2394	3341	20h	2115	1318	2259	2431	2456	2475	1438	20h	3766	3807	3552	3455	2475
	3342	3793	4555	4306	4313	2904	3580	5161	2649	2476	2142	3624		1549	1455	1457	2724	2343	1608	1194		3761	3704	3594	3359	3246
	4534	2842	4146	4126	3719	3878	3040	6009	4293	2426	3639	2272		2201	1491	2158	2583	1484	2016	1854		2525	2380	3830	3808	3215
	3842	2850	3086	4066	3976	4010	4247	5516	3906	3851	3562	4183		2342	1661	2022	2456	2339	2360	2021		3803	2630	3842	2839	3211
	3231	4341	3027	4440	3904	4039	4345	6285	3145	3101	2638	3723		1520	1770	1454	2390	2424	2040	1647		4079	3832	3613	2854	2295
	4207	3961	3854	3781	3719	3799	3912	5775	2572	3164	2668	3767		2310	1741	2208	2041	2210	2481	2169		2544	3786	2940	3576	2295
	3965	3980	3166	3889	3562	3672	3069	5619	4060	2388	3317	2576		2087	1227	1841	1607	1417	1801	1761		3568	2730	3674	2413	3208
	3126	2784	3615	3505	3594	2475	2753	6071	3665	2106	2630	2071		1497	1275	1423	1541	1400	1525	1279		3949	2754	3938	2182	3416
	3162	3443	3685	3467	2562	2695	2793	5992	3740	3187	2169	2593		2241	1200	2114	1615	2241	1603	1571		3499	2399	3896	3594	3376
	3875	2736	3028	2888	2665	3049	2672	6365	3963	3029	2365	4031		2356	1070	2296	2241	2208	1828	2156		2641	2565	3955	3577	3536
	2967	3827	3207	3073	2902	4295	2753	6172	2633	2213	3316	3916		1470	1341	2360	2424	1729	1918	1553		3580	4025	2873	3721	2445
	3208	4447	3341	4306	2703	3737	4548	4914	2739	2092	3549	3959		1357	1834	2218	1547	1387	1922	1723		4258	3927	2520	2221	2184
	4550	4057	4389	3963	2478	2640	4059	6080	3677	4081	3880	3009		1656	1252	2328	1456	1390	2483	1547		3009	3921	4004	2275	2274
	3968	2941	4428	4061	3713	2703	4036	5356	2576	3459	3500	2199		2045	1786	1642	1406	1285	1882	1318		2832	3893	3499	3697	3562
	2810	3996	3413	4007	3912	4297	3061	4356	2607	3365	3395	3683		2346	1169	1510	1405	2179	2016	1535		4056	2513	3891	3382	3505
	3991	3672	2921	2635	4208	4104	2758	3929	2430	2194	2364	4082		1706	1548	1420	1384	2274	2430	1280		4183	2231	2997	3762	3281
	2806	4192	3943	2701	3766	3970	3344	6031	3923	2086	2244	3908		1380	1407	1352	2166	1797	1584	1920		3794	2322	3779	3736	3387
	2766	4063	3881	2625	3673	2647	4722	6337	3951	3440	3054	4135		1654	938	2064	1645	1314	1661	1804		3975	3065	2783	2220	3020
	2681	3633	2788	2836	3797	3119	4095	6498	3996	3811	2981	4147		1277	1193	1335	1393	1190	1606	1097		3004	2475	2694	1964	2211
	4144	3077	3003	4061	3297	2993	3866	6487	4067	3568	3344	4169		1386	1230	1284	1378	2170	1577	957		2775	3443	2265	2063	2187
	4355	4252	2833	4148	2430	4363	3274	5797	3803	3615	3015	4096		1770	1269	1652	1714	2197	1396	1662		3359	3561	2366	3505	2148
	4159	4273	2653	2735	2642	3804	2600	6604	3996	3081	2625	3140		2276	1210	1353	1409	1498	1613	1856		3005	2456	2847	2327	2481
	3632	4040	4263	2596	2495	3106	2734	4742	3440	1954	2454	2425		2104	1335	2120	2413	1846	1953	1059		2492	2521	3187	2444	3216
	3067	3962	3925	2715	2490	3212	2527	5662	2891	2527	3703	2261		1318	1854	2230	2457	2108	1771	1088		2504	2549	2087	2993	3599
	2720	2934	3145	2780	2622	4662	2842	5702	2439	2078	4023	2354		2079	1208	1481	2053	2207	2393	1687		3202	3281	2338	3655	3623
	4120	3678	3362	2707	3226	2824	2490	5509	2227	2245	3762	2199		1820	1750	1265	1458	1938	1867	1004		2574	3647	2269	2211	3168
	4277	4191	2872	4243	2730	4054	3514	5945	2328	2063	3718	2266		1330	1148	1343	1486	1371	2245	1086		2647	3110	2403	2224	2270
	3860	3014	3923	4435	2650	2859	2787	5616	2274	2306	4108	3358		1292	1105	2047	2242	1656	2402	786		2457	2471	2583	3642	2266
	3033	3947	2846	3599	2334	4142	2518	5007	2472	2178	2503	3634		1305	1489	1823	2442	2137	1624	1170		2604	2785	1988	3579	2382
	2884	3199	3394	2697	2632	3015	2844	5563	2717	3381	2608	2187		1730	1071	1370	1577	1689	1533	1322		2880	3868	2214	3841	2642
	3269	3999	4352	2759	2533	4202	3707	5373	3233	3264	2516	2009		2225	927	1739	1532	1774	1649	1191		3568	3595	3355	3450	3460
	2960	3790	4185	4015	3278	4017	3765	5280	3830	2100	3995	2625		1560	1327	2335	2166	1639	1806	1753		3849	3816	3204	3011	3268
	4574	4288	3926	4070	3082	4454	2816	4579	2473	2093	4041	3576		1419	1372	2244	2413	1933	2033	827		2661	2861	2946	2128	3321
	4513	4200	3259	4047	3802	3977	2684	5345	3047	2256	4099	3767		2270	1173	1512	2163	2007	2491	1515		2900	4000	2667	3951	2780
	4247	3944	4541	4076	3821	4259	3959	6193	3350	3328	3958	3314		2191	1294	1665	1706	1594	2384	1396		3545	3775	3127	3988	2396
	4111	3926	4397	4046	3743	3936	4213	6519	3973	3701	4088	3383		1513	1040	2334	2440	1298	2155	1936		2871	3848	3325	3707	3460
	3759	3498	4128	4144	3569	3491	3884	5934	4017	3259	4139	2938		2154	1119	1786	2597	2239	2133	1055		3588	3977	3015	3366	3329
	3818	3917	3952	4074	3514	3325	4004	6206	4029	3722	4029	4036		2158	1254	2240	1866	1295	2285	2020		3737	3639	3099	2205	3529
	2924	3193	3111	3828	3279	2871	2837	6726	2543	3373	4158	4066		1351	1040	1433	1477	1137	1771	1505		3927	3634	3530	1944	3640
	2658	4073	2642	3913	3495	2979	2571	5751	2603	2158	3713	3938		1207	1481	1476	1402	2069	1360	1684		3765	3815	3183	1875	3468
8h	2949	3167	3320	3527	3192	2936	4191	4262	2440	2359	3197	3865	8h	1104	983	1432	2078	1927	1278	1052	8h	3990	3748	2370	1983	2525
	4024	3597	2284	3156	3274	3202	3887	5844	3873	3754	2209	3958		2031	1303	1731	2159	2065	1439	853		3555	2538	2207	3291	2637
	2515	3201	4112	2768	2897	3981	3708	5767	3725	3878	2395	3856		1909	1034	1743	2147	1191	1149	1131		2445	2542	2221	2037	3172
	2770	3240	3668	2551	2564	3535	2894	5244	3783	3686	3918	3166		1119	1128	2081	1488	1104	1185	970		2547	2543	2961	2118	3220
	2665	3041	3367	3135	2789	3324	2808	4123	2746	3468	2383	1989		1043	1158	1625	1383	1503	1002	882		3258	2497	2047	2300	2042
	4195	3004	2729	4004	2536	3189	3447	5696	2361	3612	2383	1931		1173	1148	1352	1600	1135	1162	933		3754	3492	2152	3372	2313
	2169	2834	2736	3309	3186	3775	2655	3859	2296	3325	2661	2301		876	1500	1517	1270	1237	1300	1479		2369	2312	2111	1860	2301
	2606	3127	2678	2880	2556	3211	2666	4247	3131	3031	2236	1899		1035	761	1963	1205	2555	2400	1598		2428	2566	3136	2617	3101
	2820	3372	4008	2959	2582	3072	2541	3957	2336	2293	3955	2126		1747	1128	1451	2214	1952	2502	1188		2792	2782	2666	2462	3093
	2757	3037	2725	3020	2896	3571	3794	3674	2237	1897	3409	2339		1721	1033	1798	1757	1249	2036	1027		3113	2735	2100	4174	2823
	3748	3120	2894	3826	3737	3021	2658	3417	3339	2136	2687	3436		1709	1258	1638	1178	1210	2258	1168		3179	2749	2078	2835	2172
	2382	2229	2930	2788	2320	2918	2806	5486	3596	2187	2609	3459		1027	691	1049	1703	1333	1486	1445		4176	2375	2625	2283	2195
	2555	3436	2589	3097	3121	3204	3316	5778	3511	2322	2496	2342		1229	1193	1446	2538	1728	2610	1832		2366	1921	2025	2203	2544
	2795	2692	2677	3040	2595	2720	3536	5866	3302	3275	2226	1873		1173	942	1724	2153	1928	2191	937		2414	2993	2109	2775	2556
	2811	2514	3430	4055	2759	3352	2947	4026	2246	3332	3203	2055		1870	874	2219	2159	1854	2528	1047		2539	2405	2134	2938	3272
	2690	4085	3368	3111	2570	2552	2627	4412	2240	3262	3155	2158		1723	1326	1693	1283	2181	1596	975		3509	3311	2688	2494	3426
	2786	2298	3032	3037	2382	3002	2583	3894	2582	3085	2359	2033		1298	986	1718	1108	1076	1514	1099		3375	3898	2914	2413	2879
	3834	2853	2941	3024	2534	2612	3296	3814	2301	2018	2463	3036		1360	1182	1746	1279	1919	1618	1756		2622	3565	3372	2247	2590
	3760	3159	4056	2885	3611	2460	2721	4306	2060	2268	2495	2263		1309	1076	1646	1713	1181	1687	1807		3169	3875	2359	2511	2372
	3259	2769	3942	3462	2792	2652	3274	5299	3250	2256	3447	2087		1895	1240	1634	2476	1372	1720	1262		2594	2515	2497	3395	2350
	2955	4050	3626	3159	2560	2783	2763	4947	3212	2316	2975	2246		1232	1393	1573	2256	1472	2025	959		2779	3086	2304	3231	2342
	2798	2953	3069	2987	3175	2798	2868	4255	2446	2381	2425	2181		1282	908	1864	2452	2584	2460	984		2754	2702	2104	2204	2327
	2659	3468	3169	3003	2832	2651	2734	3750	2554	2024	2515	1954		1416	1007	2074	2345	2068	1369	915		2800	2853	2430	2391	2204
	3256	2559	2816	2950	3222	2552	2766	3396	2294	2213	2337	2330		1383	1105	1591	2101	1580	1415	964		2819	3242	2438	2400	2135
	3476	2873	3589	2808	2756	2469	3575	3883	3349	2979	2479	2239		2003	1419	1611	1977	1242	1660	972		2571	3393	2165	2557	2409
	2880	2723	3208	3440	2570	3626	2889	3612	2874	3289	3239	1996		1945	1086	1725	1604	1355	2062	845		2997	2726	2115	2447	2268
	2947	2575	2844	3794	2556	3048	3328	3795	2584	2193	2534	2363		1358	1217	1838	1841	2177	2191	1216		3855	2359	3437	3708	2105
	2879	2663	4006	2926	3689	2796	2534	5022	2376	2293	2487	3397		1394	1906	1938	2244	1989	2331	1648		2544	2703	2921	2774	2225
	3967	3654	3655	2862	2842	2525	2842	3192	2375	2306	2320	3104		1362	1087	1476	1457	1396	1436	1105		2689	3629	3160	2494	2913
	4202	2755	2714	2870	3849	3045	3687	3608	2466	2382	2402	2043		1308	1119	1562	1451	2122	1327	1109		2400	3626	2440	3825	3208
	3073	2776	2960	4665	3494	3879	3793	3556	2307	3043	3229	2015		1449	1077	1781	2250	2107	1439	1393		3579	2947	3411	3305	2968
	2772	3188	2744	3940	2557	3408	3615	3645	3183	3397	2767	2110		2029	1139	1713	2259	1544	1579	1049		3582	2834	3579	3203	2072
	3188	2731	3053	3739	2763	2826	2933	4429	3308	2920	2408	2122		1979	1238	1558	1495	1402	1671	918		2705	2756	2520	2478	2063
	2758	2712	3097	3376	2771	3698	2891	6022	2226	2249	2325	1973		1769	1190	1559	1507	1826	1709	1729		2751	2801	2999	3162	2303
	2987	4034	3327	3225	2667	2773	3112	5678	2342	2315	2324	2730		1408	1174	1669	1639	2475	1799	1397		2618	2794	2718	3384	2734
	3859	3777	3910	2943	3840	3015	3052	5730	3201	2429	2445	3598		1457	1701	1752	2438	1821	2693	1900		2760	3746	2649	2461	2036
	4012	3058	2852	2950	2869	2751	2926	5993	3658	2191	3454	2847		1443	1153	2112	2416	1336	2412	1097		4153	2862	2287	2638	2333
	3148	3603	4139	3322	2691	3614	3035	4114	2398	2389	3484	2046		2035	1238	2015	2460	1563	2556	1013		3146	2730	3333	3845	3070
	4178	3192	4041	3635	3653	3269	2850	4082	2308	2683	2829	2026		2141	1898	2324	1530	1993	1537	936		3421	3881	3268	2472	3151
	3082	2787	3131	3868	3109	2754	3544	4355	2399	2868	2339	1976		1761	1330	1575	2016	2437	1515	1018		2329	2782	2788	3541	2119
20h	3128	2851	3339	3525	2588	3171	3038	3807	2582	2388	2178	2001	20h	1472	1344	1551	2499	2049	1742	1437	20h	3218	3030	3931	2988	2282
	3193	4003	3864	4153	3533	3842	4010	5958	2618	2873	2382	3603		1561	1359	1996	1674	1687	2242	1808		3372	3564	3364	3910	2616
	4691	3585	3269	4347	4060	2799	4214	5824	3861	3692	3736	3709		2287	1548	2349	2323	2409	2440	1029		2433	3583	4001	3778	3775
	4468	3990	4544	4326	3618	3803	4206	4252	3527	3734	3307	2421		1594	1283	1611	2510	1673	2367	1709		3683	2606	4176	2556	3118
	4135	3202	3404	3898	3613	4007	3925	5941	2941	3561	3396	2294		1975	1200	1733	1745	2192	1698	1537		3763	3801	3337	3799	3470
	4261	3162	3815	3571	2455	3946	3656	5326	3124	3218	2990	3742		2355	1730	1519	1574	2547	1661	2178		2275	3715	4005	3720	2421
	3984	2719	2928	3639	3693	2842	2973	4259	3820	3185	2093	4077		1934	1513	2360	2202	2390	1884	1878		2288	2470	3587	3920	2938
	3233	3431	3945	4298	3610	2629	2842	5040	3727	3553	3485	3080		1445	1026	1644	2497	1800	1731	1297		2300	3554	3073	2443	3547
	2979	3357	4263	4108	3025	3224	2862	6544	4005	2391	3219	2667		1427	918	1396	1650	1452	2624	1461		3407	3801	3980	3579	2969
	4347	3010	3079	3072	3090	3984	2903	5682	3931	2778	3294	3471		2337	1126	1427	1587	1417	2478	1409		3746	2805	4075	3811	2309
	4399	3452	3518	3334	2796	2555	3805	5642	3543	3283	3223	3001		2289	1301	2480	1820	2053	2437	1194		3877	2418	3999	3925	2285
	4205	3963	4580	3131	3533	2757	4009	4518	2947	3585	2974	4164		1548	1267	2536	2281	1700	1632	1908		2855	3272	2967	3674	3460
	3142	3292	4027	2957	4199	4036	2586	6449	2405	3109	2048	3826		1384	1169	1467	2421	1276	1519	1571		2804	4010	2909	2942	2851
	4028	2605	3336	4685	3743	3965	2753	4504	2616	3495	2295	2548		2192	1199	1459	1550	1449	1512	1756		2503	3299	3988	2192	2151
	4351	3032	2808	3815	3430	3665	3644	5905	3853	2973	2300	3482		2374	1218	2317	1474	1446	1745	1093		3456	3706	3882	3444	2218
	2937	2659	4038	4294	2841	3629	4140	6707	4074	3519	2646	3684		1467	1170	2257	1448	2218	1767	1025		4308	2395	2815	4267	3084
	2979	4422	4027	3876	3219	2527	4254	5481	3875	3098	3656	3861		1280	1728	1474	2168	2280	1847	1705		4113	2286	2660	3697	3005
	3056	4097	2701	4134	3730	3015	4132	4740	4070	3731	3238	2756		1228	1071	1425	1861	2408	2389	1665		3854	2458	3965	2283	3261
	3162	4074	2775	2921	4265	2894	2844	4349	2550	3497	3526	2288		1507	1123	1553	1489	1480	2515	1960		3852	2344	3941	1976	2535
	3807	3681	2818	2914	2780	2557	2431	4544	2467	2393	3022	3988		1231	1770	1250	1351	1342	2464	2008		3082	3685	2703	2374	2342
	3335	3850	3012	2779	3335	3872	3092	6039	3686	2413	3120	4117		2171	1033	1233	1869	1352	2055	1819		2558	3073	2698	2393	2471
	3126	3782	2672	3419	3007	3542	2652	4652	3685	2353	1741	3747		2095	1143	2072	2441	2076	1577	1375		3599	2470	3429	3752	3638
	4102	2758	2883	3117	3877	2582	2849	5420	3978	2312	1820	3467		1288	1142	2281	1605	2287	1416	1139		3585	2678	3219	2539	3515
	4497	2252	3718	2598	3607	2641	2380	6168	3580	2781	2616	2841		1234	1060	1843	1484	1274	1428	1179		3671	2618	2679	2619	3598
	4007	3768	3724	4122	3824	2924	3491	5063	2808	2678	3594	2195		1228	1049	1241	2018	1417	1537	1299		2311	3756	2932	3221	3411
	2785	2526	2680	2611	3320	2606	2460	5536	2292	2514	3358	2321		2137	990	1337	1693	2132	1531	1467		2006	2819	2643	2570	2238
	2795	2641	2746	3334	3511	2870	3782	6017	2801	3325	3438	2119		2075	1179	2258	2424	2299	2539	1416		2183	3704	2606	3653	2273
	4050	2416	2600	3601	3145	3498	4105	6212	2328	3639	3181	2167		1463	1269	1283	1911	1916	2523	996		2090	3167	2938	3076	2459
	4549	2607	2801	3109	3215	2747	3698	5227	2403	2234	3527	2121		1699	1080	1321	1526	1361	2185	964		3077	3875	2678	2524	3583
	4264	2708	3124	3924	3386	4086	2947	6534	2663	2228	3325	3146		1252	1246	2153	2581	1490	2187	996		2095	3681	3445	2862	3163
	4205	3438	3047	3769	3297	3587	2616	4407	2724	2345	3248	3597		1668	1228	2424	2458	2079	1547	912		2780	3033	2839	3666	3426
	3850	2735	4406	2917	3469	2398	2588	4144	3837	3655	3073	3594		1687	1466	1465	2138	2226	1923	1856		3613	3836	2649	3519	3048
	2979	4102	3978	3025	3586	3902	2849	4726	3321	3643	2268	2220		2083	1044	1350	1758	2434	1603	1575		3831	3830	2768	3758	2888
	3132	3857	3763	4103	3656	3893	4053	4209	2763	3380	1594	2921		2078	929	2320	2471	2349	2601	941		2565	3337	3217	3805	3178
	3937	3963	3933	4408	3896	3971	4036	4290	3526	2956	1590	2466		1736	1040	1980	2630	1411	2657	1775		2491	3521	3466	3255	3560
	4274	3527	4062	4328	3455	4073	3789	5224	3954	3297	3637	3617		1405	1148	1952	2435	1691	2683	1606		3612	3853	3615	3049	3356
	3738	3957	3956	4439	3194	3881	3238	4851	3877	2978	3257	3690		1959	1216	1845	2180	1216	1855	1094		3737	3861	3394	2206	3281
	2564	3566	3802	3923	2967	2954	2675	6511	3877	2846	3090	3787		1427	1210	1885	1713	1197	2451	1262		3800	3911	3169	2307	3532
	2619	3381	3710	3739	2934	2176	3492	5682	3955	3490	1991	3863		1190	1081	1940	1490	2313	2089	1674		3532	3754	3247	3123	2835
	3912	3633	2301	3630	3581	3360	4018	6262	3887	3228	1591	3625		1856	1183	1412	2193	2128	1692	1923		3556	3638	2247	3336	2045
8h	3682	3764	2510	3921	3132	3702	3875	5618	3490	2614	1306	3377	8h	1627	1440	2185	2443	1586	1510	1104	8h	3640	3453	2318	2856	2188
	2776	3653	2722	3580	3053	3380	3479	6071	3255	2570	3075	3372		1101	1143	1444	1566	1353	1484	1157		2414	2655	2184	2368	2920
	3215	2604	2927	3496	3119	2426	3711	6074	3834	2437	1652	3379		1109	1382	1672	1335	1911	1330	1217		2177	2609	2264	2589	3074
	2868	2774	2412	3200	3084	2662	2690	5861	2507	2721	1334	3365		2100	1104	2070	2085	1408	1301	1976		2302	3537	2865	3519	2120
	3199	2681	4388	3020	3039	2474	2997	6104	2585	3692	2093	3569		2000	1167	2202	1576	1373	1682	955		2233	2529	2642	2231	2109
	2882	2654	4082	3195	3264	3199	3119	5756	2312	3615	3192	2130		1280	1184	1485	1117	1513	1686	878		2302	2718	2167	3012	3355
	3010	3044	3727	2850	3028	3560	3087	5669	2634	3421	1707	1820		1124	1126	1421	1263	2385	1516	737		3425	4026	2377	2338	2726
	4277	2245	3145	2825	2848	3482	2845	5218	3018	3255	1446	1936		1270	1389	1467	2477	2159	1611	1674		4056	3445	2861	2454	3151
	2730	2916	3275	2892	3427	3261	3611	6224	3005	2995	1534	3156		1375	1339	2071	2371	1347	1655	1162		3427	2764	2037	3190	3098
	3005	3688	3273	2937	2905	2547	3684	5783	3498	1920	1362	2012		1184	1026	2250	1810	1373	2679	1014		2303	2603	2282	3088	1911
	3513	2634	2920	3281	3443	2345	3490	5221	3281	2308	1332	2132		1329	1163	1215	1263	1474	2591	867		2918	2836	2977	2341	2163
	2845	2704	2905	3166	3072	3370	2837	4477	2512	2316	3594	2003		1795	1204	1350	1203	2497	2386	1475		2816	3320	2966	2119	2620
	4642	3913	3091	2788	2650	3268	2541	4336	2422	2261	2402	2020		1978	879	2193	1988	1978	2490	1585		2186	2815	2373	3738	2428
	3057	3781	2907	3730	3122	2707	2917	4099	2506	3187	1465	2043		1524	914	2216	1689	1272	1887	929		2336	2589	2433	3267	2261
	3258	3422	3661	2603	2490	2912	2691	4193	2328	2386	1308	2996		1178	1185	1470	2478	1188	1382	816		3267	2743	2341	2651	2286
	3489	3244	2886	2858	2683	2455	2303	4382	2413	2427	1730	2835		1372	1119	1363	2140	1343	1505	920		2514	3249	2922	2719	2681
	2944	2734	2865	2825	3499	2517	2802	3846	2470	2608	1646	1963		1343	983	1303	1366	2126	1522	845		2564	2668	3021	2778	2044
	3051	2905	2879	3320	2717	3202	3622	5554	3274	2274	1850	2232		1322	1152	1337	1462	1911	1647	962		2421	2881	2144	2509	2240
	2877	2793	3270	3698	2458	2751	3532	3783	3279	2051	2138	1957		1381	1142	1535	2245	1419	1672	846		2425	3507	2197	2588	2455
	2801	3730	2996	3571	2551	2536	2813	4093	3445	3411	2863	2037		1295	1059	1389	1462	1527	1658	1469		2890	2685	2268	3286	2438
	2552	2361	2646	3454	2410	3603	2700	3943	2561	2438	1836	2041		1262	1167	1356	1751	1468	2011	1282		2545	2609	2996	2314	2257
	3311	2385	2740	2974	2506	3145	2868	3635	2469	2199	1514	2721		2144	1180	1925	2432	1545	2332	1831		2656	3371	1966	2717	2336
	3813	2266	2492	3088	3297	2676	2991	4464	2715	2102	2175	2044		1828	1157	2025	2300	2155	2495	1868		3450	2488	2250	2689	3146
	3196	2408	3326	3029	3042	2634	2872	4209	2362	2336	1815	2080		1206	1473	1398	1590	1986	1682	1725		2513	2204	2225	2420	2805
	2704	2148	2481	3031	2357	2471	2949	3922	2973	2261	2300	1985		1148	916	1354	1372	1797	1447	881		2248	2792	1982	3417	3138
	2579	2232	2681	3589	2362	2715	3649	4020	2505	2120	2014	2058		1218	797	1302	1490	1204	1667	959		1974	2157	2998	3118	1986
	2462	3395	2634	3423	2692	2436	2595	5721	2435	2676	1648	1952		1149	960	1256	1429	2005	1605	983		2244	2812	2386	2404	3229
	2366	2050	2753	3466	3413	3396	2776	5108	2785	3504	4054	2526		1083	969	1347	1612	2101	1724	1518		2228	2479	2403	2544	2827
	2871	2568	3712	2764	2869	2553	2707	6011	3449	2894	3738	2955		1176	889	897	1936	1332	1619	1447		2202	2446	2427	2585	1974
	3294	3156	3493	3013	2851	2838	2737	5685	3386	2086	3422	2237		1675	966	1940	2393	1578	1622	1203		1946	2464	2176	2520	2243
	2386	2359	2554	3272	3853	3659	2681	5615	2339	2141	2938	1953		1601	1122	1260	1918	1655	1755	898		2062	2300	2233	3666	2320
	4293	3145	3622	3487	3380	3395	3232	5182	2213	2231	2255	2233		1567	1406	2257	2188	2408	1509	948		2020	3077	3078	3130	1953
	2635	2659	3901	2901	2522	2949	3805	5738	2363	3048	2378	2004		1206	1311	1614	2190	2263	2490	1001		3289	3272	2574	2508	2959
	3795	2504	3365	3121	2552	2797	3026	5396	3333	2986	2603	2175		1366	1033	1547	1583	1472	2400	1603		3352	2718	2353	2475	3017
	2889	2811	3278	2897	3126	2698	2687	4428	3499	2279	3613	2404		1881	1483	1509	1502	1481	2496	1584		2777	2572	2330	3291	2144
	3223	3915	3355	3827	3565	3455	2764	5216	2254	2172	3393	3542		1406	990	1660	2332	2337	2400	1046		2785	3073	2821	2622	2383
	3128	3576	3527	3446	2708	2704	3690	6191	2523	2378	2466	3027		1395	1082	2481	1715	2461	1946	1147		2880	3355	1989	2512	2228
	2992	2751	3107	3926	2500	2617	2803	4571	2549	2302	2282	1947		2210	1025	2376	1440	2381	2080	988		2781	2824	3062	3150	2577
	4650	3721	3104	3566	3188	3502	2889	4220	3247	3042	3559	2252		1825	1459	1416	2298	1416	1575	1039		3892	2911	2217	2661	3112
	2817	3020	3815	3203	2680	2808	3006	5920	3473	2958	3474	2229		1333	1344	1545	1634	2336	1731	1536		2601	2795	2161	2905	2301
20h	3198	2969	3286	3488	3976	3719	2822	5781	2368	2125	2758	3253	20h	1437	1560	2379	2384	2444	1971	1733	20h	2881	3681	3434	3796	2330
	4746	3949	4987	4423	3596	3966	4252	6245	2641	3453	2480	3231		1879	1257	1610	2542	1767	2646	1215		3130	2590	3533	3750	3533
	4021	3688	4048	4198	2955	3917	4276	6721	2600	3324	3685	2178		2182	1272	1765	2587	2453	2430	1280		3940	4237	3676	2739	3303
	3905	3243	3316	4292	2856	4062	4169	6866	3964	2162	3830	3369		1735	1449	2419	2018	2569	2240	1757		3495	3747	3714	3980	2889
	4598	3291	4019	4258	3137	3640	3969	5486	3500	2316	3632	2976		1352	1209	1664	1679	2392	1738	2177		3247	2699	3444	3654	3122
	3640	4131	4160	4199	3756	3366	3902	4591	3308	3503	3431	2902		1337	1105	1381	2403	1480	1550	1735		2655	2542	3830	3764	3189
	4471	3855	4101	3779	3664	2533	2986	6894	2737	3369	2769	2529		1709	1080	2225	1889	1424	1738	1557		2492	3595	3676	3164	3261
	4427	2999	4024	3079	3321	2508	3357	6281	3575	2996	2459	3901		2248	1415	2052	1545	2388	2485	1363		3894	3943	3508	3659	2303
	3652	2828	3029	4283	3210	3942	3970	6706	3864	2100	4018	3846		2091	1330	1833	2376	2317	2490	1298		3977	3265	2801	2854	2287
	3199	2973	4456	4502	2645	4286	4615	6219	3196	2240	2734	3074		1386	1178	1751	1736	2320	2410	1852		2534	2583	3618	2462	2903
	4419	2714	4292	4429	3728	3546	3428	6687	2700	3121	3155	2176		1324	988	1598	1591	1457	1882	1266		2250	2510	4173	2545	2754
	4019	4303	3994	4037	3637	3679	2852	6516	2895	3038	3296	4149		2264	886	2009	2240	2299	1546	2158		4031	2670	4055	4090	2128
	4224	4106	3978	4511	2635	3109	4393	5965	3545	3213	3156	3118		2208	1171	1498	2013	1570	1605	1350		3389	3910	4055	3768	2991
	2967	3857	4715	2880	2460	2629	3969	5589	3383	2085	2504	2437		1692	1223	1458	1592	1616	1673	1505		3710	4170	3872	3835	3151
	3775	3377	4489	3992	2785	2707	4166	5024	2901	2110	3382	4111		1420	1372	1244	1999	1317	1921	1438		3038	4027	2709	2375	2652
	3444	3522	4103	3998	2612	2566	3048	5248	3151	2391	3384	3911		1459	1045	1462	1802	2002	2631	1446		4063	3961	3320	3705	2472
	3920	3801	3838	4188	2360	3077	2661	4226	3737	3240	3915	4318		1263	1355	2179	1866	2042	2502	1096		4074	2570	2291	3607	2213
	4474	3857	3943	3817	4011	2594	2615	4536	3174	3517	3643	3018		1346	1122	1324	1716	2214	2448	1964		3972	2323	2492	2290	2381
	4230	3807	3257	3041	3717	2446	3101	4141	3078	3376	3894	4150		2233	1139	1150	1584	1928	2458	1210		4233	2423	2394	2368	2848
	4496	3560	3105	2913	3343	2355	4829	4565	3882	2447	2799	4073		2192	1466	799	1485	1433	2363	813		4065	3792	3274	2505	2801
	3570	2474	2932	2629	3315	3348	3652	6334	3907	2327	3142	3960		1596	1058	1452	1548	1241	2032	759		4084	3716	3550	3708	3374
	2965	3824	3164	4340	2439	4176	4429	5845	3697	2968	2801	3439		1256	990	1544	2127	2222	1575	1252		2475	2601	3014	2657	2055
	4163	3068	3180	3037	2436	3515	2650	6697	3777	3323	2398	2437		1200	1025	1449	1568	2306	1510	2115		3060	2603	2254	2990	2071
	2835	2812	3994	3159	2728	2317	2926	6425	2531	3331	2443	2523		1181	911	2149	1601	1360	1852	1259		3837	2735	2243	3483	2293
	3287	3923	3926	2693	2507	2490	2564	6261	3142	3418	2780	2456		1366	892	2527	2071	1525	2201	1103		2261	3480	2243	2518	2825
	2935	2664	2984	4019	2717	2716	3386	5932	3538	2121	4050	3444		1308	840	1444	1740	2226	2174	1612		2787	3793	2167	2545	3125
	4189	3495	2951	4107	2389	3352	2811	6663	3149	2092	3675	3048		1986	893	1309	2157	1556	1731	1297		2447	2596	2463	3548	2409
	4277	2617	3175	3139	3143	3747	2958	5959	2611	2387	3701	2453		2131	880	1627	1867	1325	1748	1810		2540	2538	2219	3814	2294
	4311	2796	3721	3097	2480	2780	3528	5698	3403	2300	3885	2537		1461	1009	2065	2314	2256	1645	1110		3470	2629	2621	3511	2313
	4141	3697	3047	2890	2823	2550	3044	5481	3084	2188	3674	2301		1275	1078	1404	2067	2307	1653	887		3936	4584	3131	2747	2294
	4028	2878	3403	2666	4141	2702	2783	4342	3578	3104	3943	3899		1504	1143	1378	1677	2461	1802	797		2232	3667	2939	3650	2705
	2656	2585	5011	4803	3020	3482	2661	4015	3403	3268	2691	3024		2067	1137	1517	1540	2067	2394	1584		2669	3424	2414	4110	2444
	3134	3110	4074	4161	3248	3939	3435	4713	2852	3257	2703	3529		2060	1209	2404	2026	2390	2741	976		2560	3609	3387	3437	2319
	4186	4146	3821	4172	2391	4018	4455	5271	3647	2936	2450	3348		1673	1327	1939	2093	1447	2641	953		3338	2912	2494	3758	2627
	3946	4032	4038	4369	3394	3857	3803	5675	3795	3261	3631	3391		1397	1133	2226	2035	2096	2734	1910		3856	3585	3333	3638	3108
	3861	3837	3607	3972	3508	3877	3760	4378	4118	2752	4108	3698		1850	1228	2568	2012	2130	2569	1766		4342	3929	3097	3666	2227
	2605	3493	3858	4104	3077	3841	3666	5825	3604	3408	3982	3565		2096	1123	2486	2526	1301	2350	1414		4015	3897	3478	3081	3187
	2671	3059	4119	3741	3151	3477	2610	6657	3742	2895	3941	3213		1920	1130	1815	1706	1883	2406	2160		4039	3991	3536	1925	3255
	2542	3123	2874	3732	2993	2972	3589	6486	3836	2934	3789	2535		1192	1126	1438	1386	2105	1528	1243		3748	3748	3143	3552	2976
	4095	4183	4053	3342	2386	2157	3438	6174	2270	3033	3943	3035		1099	1150	1387	1497	1745	1371	1520		3720	3621	2940	2074	2820
8h													8h								8h
18h*													18h*								18h*
20h													20h								20h
8h													8h								8h

## Sheet: Fig S1G
Respiratory exchange ratio
Dark phase				Light phase				24h
Ubi	LepRNull	Ubi-LepRNull		Ubi	LepRNull	Ubi-LepRNull		Ubi	LepRNull	Ubi-LepRNull
0.950825	0.954769	0.965438		0.844233	0.94055	0.879358		0.9007	0.952471	0.922308
0.9379	0.933144	0.945831		0.867608	0.926517	0.856008		0.902171	0.934479	0.906238
0.930494	0.97695	0.970081		0.903417	0.964717	0.889192		0.917046	0.973533	0.929796
0.93225	0.966956	0.976713		0.859517	0.935908	0.867758		0.900329	0.952713	0.923206
0.966963	0.983844	0.957388		0.900783	0.976758	0.904275		0.937513	0.984479	0.937567
0.934931	0.963013			0.886675	0.939567			0.911733	0.954163
0.944675				0.871817				0.914817
0.983831				0.915692				0.950467
0.946606				0.9127				0.925529
0.9175				0.890875				0.903517
0.940113				0.825183				0.876063
0.970869				0.882683				0.928363

## Sheet: Fig S1H
Respiratory exchange ratio
Time of day	Ubi												Time of day	LepRNull						Time of day	Ubi-LepRNull
18h	0.943	0.95	0.795	0.873	0.968	0.916	0.843	0.904	0.912	0.837	0.88	0.779	18h	0.909	0.863	0.968	0.942	0.91	0.949	18h	0.939	0.78	0.942	0.835	0.835
	0.944	0.984	0.801	0.921	0.969	0.829	0.924	0.918	0.944	0.88	0.863	0.755		0.932	0.929	0.923	0.911	0.915	0.918		0.836	0.878	0.95	0.82	0.83
	0.921	0.932	0.795	0.818	0.935	0.903	0.826	0.927	0.917	0.923	0.844	0.915		0.908	0.859	0.958	0.91	0.892	0.949		0.839	0.831	0.89	0.884	0.839
	0.924	0.924	0.815	0.817	0.881	0.959	0.855	0.962	0.872	0.898	0.828	0.921		0.894	0.866	0.998	0.904	0.95	0.909		0.841	0.801	0.905	0.86	0.92
	0.959	0.954	0.844	0.823	0.843	0.927	0.918	0.964	0.856	0.92	0.878	0.966		0.95	0.866	0.932	0.928	0.952	0.941		0.81	0.772	0.92	0.894	0.922
	0.94	0.916	0.842	0.992	0.933	0.891	0.929	0.937	0.9	0.891	0.927	0.926		0.955	0.892	0.911	0.991	0.922	0.947		0.855	0.809	0.991	0.919	0.882
20h	0.935	0.925	0.849	0.917	0.945	0.925	0.895	0.929	0.941	0.893	0.897	0.916	20h	0.906	0.915	0.954	0.981	0.923	0.972	20h	0.911	0.892	0.85	0.963	0.897
	0.95	0.927	0.867	0.957	0.972	0.95	0.914	0.96	0.905	0.967	0.877	0.952		0.923	0.886	0.97	0.999	0.933	0.96		0.935	0.896	0.858	0.991	0.892
	0.968	0.985	0.868	1.005	0.922	0.968	0.939	1.002	0.969	0.951	0.901	0.868		0.978	0.907	0.97	0.975	0.949	0.954		0.933	0.875	0.948	0.965	0.975
	1.007	0.958	0.927	0.898	0.957	0.938	0.895	0.989	0.929	0.919	0.88	0.892		0.939	0.874	0.93	0.96	0.985	0.947		0.937	0.913	0.954	0.989	0.954
	0.989	0.904	0.929	0.949	1.002	0.978	0.963	0.992	0.944	0.971	0.982	0.911		0.895	0.904	0.953	0.956	0.941	0.951		0.95	0.913	0.953	0.987	0.966
	0.976	0.963	0.853	0.964	0.963	0.95	0.984	0.98	0.992	0.989	0.952	0.948		0.909	0.861	0.972	0.962	0.973	0.954		0.955	0.933	1.024	0.972	0.946
	0.957	0.991	0.941	0.916	0.969	0.908	0.915	0.983	0.976	0.928	0.902	0.964		0.904	0.896	0.95	0.919	0.967	0.953		0.945	0.913	0.979	0.986	0.944
	0.993	0.991	0.93	0.922	0.861	0.949	0.969	0.956	0.968	0.958	0.877	0.974		0.932	0.926	0.936	0.975	0.936	0.949		0.984	0.894	0.973	0.952	0.962
	0.977	0.968	0.923	0.949	0.966	0.918	1.009	0.959	0.97	0.92	0.968	0.95		0.932	0.932	0.981	0.956	0.949	0.939		0.962	0.881	1.047	1	0.973
	0.974	0.99	0.955	0.914	1	0.963	0.97	0.985	1.004	0.9	1.005	0.972		0.909	0.896	0.948	0.944	0.926	0.941		0.966	0.926	0.977	0.969	0.963
	0.968	0.99	0.927	0.942	0.981	0.905	0.973	1.007	0.969	0.974	0.959	0.967		0.917	0.973	0.962	0.957	0.913	0.954		0.991	0.93	1.002	0.971	0.93
	0.959	0.998	0.893	0.967	1	0.9	0.967	0.976	0.976	0.957	0.965	1		0.938	0.882	0.966	0.978	0.929	0.94		0.958	0.925	0.992	1.004	0.934
	0.998	0.993	0.92	0.962	0.986	0.88	0.975	0.986	1.008	0.949	0.974	0.983		0.951	0.924	0.989	0.889	0.969	0.946		0.983	0.909	1.035	0.993	0.901
	0.965	0.982	0.952	0.863	1.024	0.904	0.932	0.996	0.961	0.955	1.007	0.961		0.945	0.951	0.963	0.928	0.973	0.949		1.001	0.953	0.981	0.955	0.961
	0.991	1.007	0.942	0.869	0.985	0.958	0.962	1.036	0.998	0.959	1.001	0.987		0.945	0.892	0.974	0.949	0.948	0.973		0.957	0.938	0.99	1.01	0.934
	0.973	0.993	0.952	0.949	1.008	0.953	0.962	0.985	1	0.945	1.002	0.978		0.898	0.959	0.955	0.956	0.985	0.959		1.044	0.927	1.014	0.968	0.874
	0.98	0.98	0.941	0.911	0.979	0.859	0.923	1.002	1.015	0.956	1.007	0.998		0.871	0.886	0.942	0.946	0.957	0.956		0.975	0.905	0.981	0.976	0.823
	0.981	1.016	0.96	0.94	0.964	0.922	0.846	0.984	0.955	0.884	1.001	0.98		0.958	0.944	0.975	0.928	0.968	0.916		0.967	0.872	1.01	0.98	0.842
	0.996	1.012	0.965	0.927	0.967	0.882	0.949	0.991	0.997	0.963	1.03	1.038		0.905	0.938	0.964	0.991	0.965	1.001		0.988	0.964	1.015	1.012	0.854
	0.961	1.005	0.932	0.906	0.907	0.994	0.898	0.975	0.975	0.936	1.026	0.991		0.935	0.915	0.983	0.961	0.966	0.942		1.003	0.938	1.063	0.984	0.946
	1.001	0.956	0.933	0.946	0.954	0.93	0.909	0.988	0.979	0.941	0.998	0.986		0.922	0.903	0.929	0.98	0.952	0.939		0.984	0.946	1.079	0.893	0.95
	0.975	0.956	0.933	0.9	0.911	0.932	0.875	0.99	1.039	0.973	1.004	1.011		0.918	0.905	0.969	0.908	0.964	0.982		0.948	0.908	0.932	0.98	0.902
	0.942	0.98	0.944	0.931	0.901	0.892	0.851	0.959	1.003	0.948	0.986	1.023		0.939	0.876	1.001	0.962	0.935	0.936		1.018	0.865	0.977	0.98	0.839
	0.96	1.011	0.923	0.875	0.858	0.887	0.869	0.997	0.955	0.913	1.003	0.968		0.956	0.847	0.944	0.977	0.953	0.912		0.95	0.815	0.893	0.942	0.804
	0.942	0.941	0.897	0.865	0.893	0.918	0.84	0.971	0.966	0.917	1.006	0.996		0.88	0.907	0.913	0.952	0.958	0.93		0.992	0.829	0.908	0.936	0.829
	0.931	0.839	0.968	0.929	0.991	0.869	0.905	0.984	0.968	0.899	1.01	1.011		0.935	0.899	0.986	1.005	0.921	0.952		0.937	0.905	0.977	0.962	0.943
	0.92	0.859	0.937	0.845	0.884	0.816	0.813	0.953	0.988	0.89	1.017	1		0.925	0.871	0.917	0.938	0.958	0.937		0.975	0.95	0.946	0.95	0.96
	0.954	0.871	0.882	0.888	0.878	0.915	0.921	0.908	0.988	0.842	0.957	0.915		0.937	0.883	0.943	0.948	0.93	0.919		0.943	0.891	0.975	0.984	0.935
	0.914	0.831	0.871	0.923	0.885	0.945	0.875	0.952	0.989	0.895	0.977	0.933		0.95	0.877	0.924	0.983	0.938	0.933		0.956	0.878	1.008	1.01	0.877
	0.899	0.865	0.953	0.834	0.922	0.915	0.832	0.978	0.926	0.815	0.946	0.944		0.879	0.891	0.962	0.947	1.016	0.926		0.945	0.893	0.951	1.022	0.841
	0.862	0.902	0.95	0.881	0.9	0.94	0.848	0.934	0.912	0.843	1.001	0.892		0.92	0.856	0.955	0.975	0.975	0.936		0.936	0.941	0.926	1.021	0.806
	0.867	0.875	0.943	0.896	0.956	0.944	0.803	0.945	0.878	0.799	1.027	0.953		0.921	0.902	0.976	0.936	0.951	0.901		0.973	0.923	0.902	1.008	0.832
	0.891	0.864	0.949	0.858	0.953	0.951	0.863	1.018	0.981	0.871	1.03	0.962		0.979	0.94	0.999	1.041	1	0.944		0.978	0.872	0.947	0.993	0.893
	0.855	0.84	0.967	0.877	0.927	0.95	0.926	0.973	0.931	0.914	0.989	0.891		0.894	0.922	0.966	0.951	0.96	0.925		0.955	0.953	1.006	0.982	0.968
	0.821	0.914	0.957	0.85	0.966	0.95	0.873	1.019	0.967	0.946	1.02	0.992		0.896	0.912	0.979	0.938	0.977	0.941		0.942	0.976	0.991	0.957	0.961
	0.808	0.911	0.946	0.847	0.916	0.953	0.91	1	0.984	0.909	1.005	0.936		0.924	0.904	0.972	0.925	0.989	0.943		0.952	0.937	0.934	0.946	0.961
	0.812	0.955	0.954	0.839	0.903	0.93	0.844	0.957	0.968	0.92	1.014	0.977		0.96	0.884	0.979	0.95	0.993	0.942		0.979	0.948	0.912	0.923	0.978
	0.808	0.922	0.947	0.866	0.967	0.965	0.875	1.017	0.987	0.896	1	0.963		0.94	0.902	0.96	0.984	0.973	0.995		0.96	0.949	0.927	0.934	0.986
	0.805	0.881	0.966	0.864	0.933	0.963	0.872	0.987	0.983	0.93	0.995	0.912		0.922	0.953	0.977	0.974	0.97	0.935		0.988	0.918	0.958	0.887	0.977
	0.807	0.905	0.952	0.882	0.949	1.005	0.866	0.981	1.01	0.926	0.987	0.959		0.949	0.915	0.942	0.987	0.983	0.947		0.983	0.963	0.97	0.845	0.966
8h	0.766	0.897	0.918	0.84	0.971	0.92	0.842	0.958	0.987	0.935	1	0.988	8h	0.921	0.889	0.978	0.932	0.999	0.977	8h	0.982	0.897	0.941	0.831	0.947
	0.744	0.835	0.9	0.826	0.954	0.918	0.778	0.961	1.023	0.957	0.968	0.973		0.9	0.901	0.969	0.925	0.98	0.972		0.937	0.897	0.972	0.807	0.963
	0.781	0.914	0.954	0.78	0.927	0.979	0.8	0.98	0.986	0.962	0.921	0.99		0.904	0.914	0.948	0.884	1.007	0.976		0.972	0.824	0.875	0.923	0.946
	0.763	0.889	0.958	0.829	0.874	0.955	0.847	0.969	0.962	0.943	0.892	0.954		0.94	0.906	0.971	0.967	0.981	0.945		0.978	0.893	0.962	0.869	0.988
	0.752	0.871	0.907	0.816	0.885	0.934	0.794	0.919	0.985	0.973	0.862	0.949		0.913	0.905	0.942	0.933	0.975	0.929		0.945	0.827	0.982	0.84	0.931
	0.807	0.952	0.899	0.796	0.902	0.912	0.805	0.911	0.942	0.943	0.814	0.892		0.958	0.936	0.993	0.978	0.972	0.87		0.95	0.846	0.92	0.875	0.994
	0.772	0.87	0.914	0.803	0.989	0.867	0.798	0.976	0.952	0.968	0.84	0.935		0.934	0.92	1.038	0.931	1.01	0.952		0.992	0.8	0.885	0.779	0.923
	0.756	0.862	0.941	0.803	0.892	0.849	0.76	0.973	0.906	0.907	0.758	0.855		0.962	0.923	0.922	0.923	0.984	0.889		0.975	0.792	0.836	0.801	0.883
	0.76	0.829	0.86	0.862	0.886	0.877	0.812	0.94	0.978	0.95	0.813	0.88		0.941	0.928	0.943	0.921	0.99	0.962		0.954	0.83	0.891	0.808	0.894
	0.762	0.873	0.919	0.841	0.935	0.848	0.826	0.938	0.948	0.902	0.793	0.828		0.902	0.93	0.978	0.914	0.956	0.889		0.955	0.888	0.871	0.844	0.986
	0.76	0.796	0.876	0.838	0.899	0.893	0.816	0.877	0.928	0.879	0.806	0.887		0.977	0.903	0.996	0.975	0.993	0.922		0.942	0.858	0.892	0.838	0.966
	0.753	0.85	0.915	0.826	0.979	0.944	0.78	0.845	0.922	0.834	0.817	0.932		0.924	0.879	0.924	0.918	0.976	0.9		0.89	0.839	0.802	0.895	0.908
	0.81	0.825	0.867	0.86	0.9	0.922	0.808	0.936	0.91	0.85	0.793	0.923		0.938	0.931	0.998	0.946	0.97	0.901		0.861	0.847	0.843	0.865	0.92
	0.807	0.861	0.91	0.841	0.867	0.888	0.826	0.827	0.897	0.863	0.79	0.857		0.897	0.912	0.914	0.941	0.992	0.915		0.851	0.832	0.896	0.858	0.833
	0.784	0.9	0.869	0.874	0.895	0.857	0.797	0.875	0.864	0.888	0.781	0.84		0.939	0.902	0.882	0.951	0.992	0.877		0.838	0.815	0.967	0.81	0.887
	0.788	0.866	0.884	0.863	0.941	0.916	0.764	0.833	0.877	0.966	0.81	0.895		0.915	0.892	0.962	0.88	0.998	0.926		0.831	0.822	0.932	0.89	0.879
	0.853	0.8	0.922	0.908	0.921	0.855	0.825	0.931	0.957	0.947	0.834	0.905		0.911	0.885	0.956	0.906	0.993	0.899		0.828	0.775	0.92	0.912	0.957
	0.824	0.802	0.922	0.846	0.877	0.914	0.792	0.905	0.905	0.885	0.807	0.848		0.88	0.88	0.962	0.935	1.009	0.868		0.864	0.808	0.897	0.882	0.971
	0.787	0.813	0.891	0.812	0.838	0.84	0.78	0.902	0.927	0.881	0.789	0.867		0.892	0.916	0.957	0.94	0.963	0.925		0.889	0.916	0.853	0.878	0.91
	0.769	0.79	0.861	0.871	0.822	0.844	0.826	0.822	0.918	0.876	0.803	0.837		0.896	0.868	0.941	0.935	0.939	0.936		0.917	0.896	0.832	0.799	0.888
	0.778	0.806	0.885	0.794	0.818	0.902	0.844	0.828	0.869	0.813	0.763	0.845		0.955	0.866	0.922	0.934	0.969	0.905		0.872	0.861	0.817	0.853	0.89
	0.779	0.813	0.878	0.804	0.812	0.824	0.895	0.956	0.876	0.863	0.779	0.848		0.904	0.878	0.971	0.906	0.987	0.922		0.858	0.888	0.819	0.806	0.838
	0.79	0.826	0.863	0.818	0.813	0.804	0.84	0.874	0.902	0.827	0.778	0.855		0.892	0.852	0.925	0.906	0.956	0.901		0.9	0.839	0.836	0.812	0.831
	0.815	0.791	0.918	0.801	0.849	0.846	0.809	0.816	0.819	0.856	0.777	0.835		0.886	0.876	0.96	0.906	0.974	0.966		0.907	0.834	0.817	0.901	0.807
	0.854	0.828	0.944	0.822	0.836	0.858	0.839	0.804	0.828	0.903	0.78	0.91		0.863	0.905	0.972	0.935	1.015	0.957		0.926	0.817	0.886	0.819	0.826
	0.8	0.839	0.853	0.843	0.803	0.889	0.829	0.813	0.869	0.952	0.793	0.879		0.898	0.894	0.984	0.924	0.983	0.917		0.943	0.863	0.883	0.779	0.853
	0.802	0.854	0.912	0.794	0.907	0.906	0.856	0.825	0.9	0.911	0.769	0.861		0.96	0.885	0.964	0.921	0.966	0.919		0.867	0.849	0.857	0.803	0.874
	0.814	0.829	0.938	0.812	0.887	0.871	0.872	0.806	0.932	0.93	0.789	0.906		0.918	0.853	0.971	0.966	0.961	0.966		0.875	0.809	0.872	0.823	0.854
	0.877	0.823	0.952	0.841	0.877	0.837	0.893	0.908	0.894	0.928	0.783	0.85		0.908	0.858	0.935	0.907	0.959	0.982		0.888	0.8	0.854	0.886	0.842
	0.843	0.848	0.941	0.818	0.886	0.837	0.849	0.926	0.863	0.87	0.777	0.806		0.929	0.88	0.972	0.89	0.926	0.97		0.946	0.803	0.863	0.965	0.831
	0.806	0.826	0.914	0.813	0.933	0.861	0.875	0.868	0.91	0.907	0.796	0.872		0.905	0.926	0.946	0.899	0.952	0.979		0.921	0.882	0.814	0.908	0.895
	0.823	0.916	0.866	0.875	0.91	0.876	0.871	0.849	0.979	0.89	0.789	0.951		0.928	0.884	0.966	0.902	0.939	0.988		0.922	0.898	0.867	0.856	0.953
	0.803	0.923	0.894	0.894	0.845	0.976	0.914	0.866	0.979	0.91	0.79	0.907		0.978	0.887	0.979	0.952	0.983	0.987		0.896	0.83	1.04	0.859	0.932
	0.807	0.862	0.951	0.924	0.954	0.856	0.848	0.864	1.003	0.935	0.787	0.924		0.917	0.898	0.973	0.977	0.976	0.985		0.887	0.783	0.948	0.839	0.888
	0.874	0.887	0.959	0.832	0.919	0.899	0.771	0.831	0.975	0.965	0.793	0.909		0.93	0.898	0.984	0.889	0.982	0.97		0.844	0.794	0.881	0.868	0.857
	0.833	0.819	0.913	0.921	0.972	0.844	0.868	0.929	0.99	0.959	0.778	0.877		0.883	0.873	0.954	0.959	1.024	0.984		0.88	0.838	0.947	0.783	0.846
	0.809	0.889	0.943	0.839	0.894	0.888	0.857	0.923	0.978	0.967	0.808	0.898		0.904	0.939	1.002	0.893	0.971	0.966		0.942	0.826	0.898	0.876	0.865
	0.829	0.946	0.878	0.869	0.968	0.913	0.858	0.936	0.957	0.934	0.867	0.959		0.95	0.912	0.975	0.974	0.938	0.977		0.94	0.907	0.997	0.887	0.879
	0.915	0.906	0.953	0.832	0.972	0.947	0.854	0.944	0.964	0.923	0.83	0.96		0.977	0.85	0.95	0.935	0.936	0.958		0.891	0.858	0.898	0.863	0.94
	0.83	0.869	0.907	0.95	0.974	0.891	0.903	0.943	0.967	0.917	0.784	0.897		1.043	0.928	0.908	0.975	0.945	0.95		0.856	0.859	1.01	0.815	0.963
20h	0.846	0.953	0.886	0.926	0.968	0.973	0.853	0.937	0.913	0.909	0.778	0.89	20h	0.913	0.911	0.907	0.975	0.973	0.908	20h	0.895	0.837	0.995	0.977	0.896
	0.895	0.99	0.903	0.916	0.925	0.956	0.887	0.942	0.904	0.997	0.805	1.003		0.936	0.919	0.962	0.988	0.956	0.975		0.967	0.913	0.962	0.956	0.919
	0.933	0.995	0.938	0.961	0.948	0.973	0.963	0.948	0.922	0.992	0.816	0.959		0.989	0.931	0.938	0.961	0.952	0.952		0.988	0.952	0.975	0.963	0.938
	0.937	0.962	0.953	0.972	0.959	0.919	0.984	0.938	0.972	0.942	0.833	0.965		0.96	0.901	0.931	0.957	0.949	0.944		0.977	0.887	0.994	0.968	0.977
	0.939	0.983	0.92	0.907	0.972	0.943	0.956	0.968	0.943	0.946	0.948	0.964		0.915	0.912	0.939	0.958	1.006	0.942		0.961	0.923	0.984	1.016	0.968
	0.964	0.936	0.948	0.972	0.988	0.971	0.941	1	0.933	0.941	0.964	0.982		0.961	0.932	0.916	0.923	0.967	0.954		0.952	0.971	0.985	0.996	0.961
	0.937	0.966	0.952	0.942	0.971	0.949	0.928	0.993	0.961	0.939	0.93	0.939		0.916	0.879	0.959	0.939	0.99	0.928		1.019	0.995	1.025	0.989	0.982
	0.937	0.972	0.93	0.992	1.002	0.973	0.969	1.002	0.988	0.99	0.99	0.977		0.904	0.922	0.952	1.005	1.025	0.972		0.947	0.941	0.993	0.99	0.974
	0.897	0.956	1.007	0.971	0.977	0.919	0.958	0.993	0.977	0.982	0.967	0.991		0.944	0.938	1.022	0.959	0.987	0.977		0.961	0.982	1.009	1.017	0.967
	0.964	0.966	0.983	0.982	0.938	0.956	0.995	1.012	0.971	0.923	0.89	0.962		0.93	0.95	0.96	0.959	0.957	0.948		0.976	0.995	1.003	0.965	0.956
	0.937	0.979	0.954	0.935	1.02	0.929	0.951	1.023	0.933	0.889	0.932	0.984		0.923	0.941	0.941	0.955	0.997	0.964		1.026	0.99	1.031	0.977	0.98
	0.912	0.942	0.944	0.973	1.023	0.941	0.928	1.018	0.96	0.866	0.998	1.003		0.952	0.925	0.967	0.954	1.054	0.97		0.995	0.983	1.041	0.985	0.958
	0.97	0.975	0.987	0.963	0.995	0.985	0.982	0.963	0.937	0.841	0.949	0.934		0.943	0.956	0.97	0.961	1.009	0.935		0.977	0.995	1.011	0.988	1.018
	0.938	0.956	0.978	0.978	0.956	0.952	0.966	1.002	0.967	0.915	1.007	1.011		0.94	0.904	0.976	0.955	1.009	0.96		1.06	0.966	0.986	0.982	0.958
	0.95	0.981	0.96	0.951	0.979	0.951	0.927	1.02	0.908	0.895	0.953	0.956		0.973	0.931	0.967	0.972	1.02	0.948		0.97	0.973	0.998	0.987	0.992
	0.981	0.939	0.962	0.939	0.989	0.998	0.989	1.025	0.959	0.956	1.027	0.996		0.922	0.932	0.943	0.967	0.979	0.976		1.005	1.05	1.032	0.975	0.985
	0.935	0.938	0.963	0.899	0.999	0.963	0.963	0.981	0.917	0.917	1.021	0.979		0.931	0.941	0.976	0.914	0.997	0.955		0.99	1.056	1.021	0.999	0.985
	0.951	0.971	0.986	0.894	0.984	0.919	0.936	1.004	0.97	0.919	1.008	0.957		1.016	0.959	0.946	0.966	1.064	0.944		1.002	0.966	1.049	0.994	0.96
	0.926	0.944	0.963	0.847	1.003	0.876	0.968	1.002	0.967	0.944	0.976	0.974		0.93	0.943	0.958	1.01	1.03	0.943		0.996	0.978	1.055	0.963	0.958
	0.969	0.952	0.922	0.918	0.975	0.87	0.956	1.025	0.95	0.933	0.992	1		0.909	0.928	0.994	0.988	1.019	0.905		1.036	0.962	1.058	0.926	0.983
	0.952	0.953	0.886	0.933	0.966	0.857	0.963	1.006	0.978	0.947	1.008	0.998		0.973	0.917	0.963	0.982	1.022	0.976		1.035	0.956	1.012	0.972	0.976
	0.975	0.929	0.864	0.991	0.929	0.954	0.95	0.989	0.988	0.907	0.986	0.953		0.964	0.886	0.938	0.945	1.001	0.955		0.957	0.953	1.018	0.947	0.962
	0.946	0.918	0.881	0.947	0.903	0.921	0.941	0.926	0.97	0.946	0.993	0.98		0.916	0.899	0.966	1.008	0.999	0.982		1.014	0.937	0.924	0.905	0.9
	0.949	0.929	0.909	0.874	0.916	0.887	0.934	0.943	0.952	0.836	0.957	0.965		0.936	0.926	0.944	0.957	0.97	0.927		1.005	0.896	0.935	0.931	0.963
	0.96	0.844	0.856	0.869	0.848	0.876	0.962	0.913	0.915	0.863	0.993	0.963		0.941	0.913	0.927	1.021	0.981	0.96		1.009	0.868	0.892	0.979	0.98
	0.957	0.811	0.806	0.838	0.887	0.891	0.906	0.922	0.933	0.856	0.979	0.992		0.891	0.873	0.97	1.014	1.017	0.964		1.02	0.837	0.914	0.995	0.952
	0.98	0.842	0.799	0.869	0.991	0.855	0.907	0.897	0.857	0.826	0.99	0.963		0.917	0.902	0.961	0.944	1.019	0.955		0.985	0.913	0.851	0.928	0.957
	0.956	0.814	0.906	0.861	0.937	0.83	0.852	0.867	0.868	0.818	0.994	0.928		0.902	0.895	0.959	0.969	0.939	0.949		0.998	0.957	0.884	0.929	0.946
	0.917	0.83	0.842	0.915	0.919	0.796	0.847	0.889	0.853	0.833	1.003	0.966		0.939	0.902	0.955	0.985	0.983	1.022		0.95	0.923	0.875	0.974	0.872
	0.932	0.819	0.885	0.883	0.907	0.882	0.815	0.872	0.806	0.907	0.939	0.909		0.975	0.902	0.949	0.995	1.047	0.961		0.93	0.935	0.883	0.986	0.888
	0.91	0.824	0.887	0.815	0.972	0.899	0.845	0.855	0.856	0.919	0.956	0.927		0.978	0.979	0.956	0.887	0.983	0.924		0.93	0.904	0.891	0.989	0.868
	0.892	0.816	0.953	0.926	0.911	0.94	0.839	0.849	0.891	0.85	0.985	0.905		0.936	0.901	1.004	1.055	0.973	0.931		0.975	0.957	0.925	0.965	0.92
	0.941	0.831	0.936	0.92	0.934	0.945	0.872	0.86	0.957	0.9	1.015	0.925		0.957	0.901	0.957	0.96	0.999	0.973		0.932	0.982	0.886	0.987	0.962
	0.956	0.838	0.932	0.941	1.012	0.924	0.84	0.839	0.861	0.807	1.006	0.973		0.952	0.909	0.946	0.974	0.97	0.934		0.948	0.969	0.927	0.944	0.938
	0.933	0.868	0.938	0.965	1.012	0.941	0.838	0.91	0.85	0.834	0.998	0.945		0.954	0.965	0.926	0.955	1.045	0.927		0.962	0.986	0.86	0.972	0.919
	0.924	0.888	0.91	0.92	0.985	0.937	0.937	0.925	0.9	0.908	0.993	0.935		0.926	0.92	0.963	1.02	1.014	0.966		0.965	0.965	0.944	0.97	0.93
	0.936	0.859	0.937	0.942	1.004	0.9	0.926	0.983	0.981	0.944	1.021	0.96		0.947	0.906	0.964	0.971	1.028	0.959		0.993	0.949	0.928	0.934	0.946
	0.929	0.836	0.931	0.934	0.997	0.844	0.951	0.969	0.948	0.943	0.995	0.966		0.968	0.939	0.988	0.944	0.975	0.951		0.988	0.98	0.902	0.933	0.974
	0.901	0.872	0.92	0.959	0.986	0.881	0.992	0.996	0.94	0.912	1.003	0.974		1.018	0.922	0.992	0.976	0.98	0.976		0.979	0.961	0.963	0.936	0.945
	0.852	0.894	0.923	0.936	0.989	0.858	0.969	0.938	0.92	0.9	0.972	0.967		0.987	0.916	0.993	0.974	1.051	0.957		0.966	0.926	0.935	0.929	0.95
8h	0.826	0.826	0.884	0.967	0.988	0.828	0.975	0.973	0.921	0.898	0.975	0.938	8h	0.974	0.912	0.953	0.957	1.008	0.956	8h	0.979	0.977	0.951	0.868	0.955
	0.846	0.813	0.9	0.93	0.954	0.833	0.972	0.934	0.964	0.911	1.011	0.973		0.975	0.941	0.94	0.941	1.02	0.968		0.958	0.964	0.925	0.867	0.984
	0.836	0.885	0.866	0.917	0.881	0.82	0.944	0.912	1.004	0.971	0.955	0.96		0.982	0.919	0.926	0.938	1.075	0.973		0.952	0.937	0.864	0.844	0.961
	0.805	0.831	0.959	0.919	0.89	0.79	0.947	0.925	0.973	0.954	0.959	0.932		0.977	0.97	0.948	0.968	1.054	0.942		0.991	0.969	0.813	0.795	0.949
	0.801	0.796	0.911	0.856	0.852	0.786	0.926	0.892	0.942	0.96	0.917	0.924		0.983	0.928	0.971	0.911	1.067	0.938		1.013	0.955	0.846	0.803	0.917
	0.827	0.795	0.927	0.939	0.872	0.805	0.953	0.843	0.931	0.931	0.884	0.869		1.003	0.977	1.005	0.952	1.014	0.918		0.975	0.908	0.852	0.817	0.879
	0.847	0.806	0.899	0.977	0.874	0.804	0.955	0.911	0.923	0.953	0.856	0.854		1.035	0.956	0.992	0.992	1.02	0.968		0.942	0.913	0.853	0.83	0.852
	0.798	0.799	0.867	0.947	0.929	0.808	0.91	0.902	0.923	0.943	0.868	0.854		0.96	0.958	0.997	0.952	0.909	0.963		0.915	0.873	0.849	0.848	0.875
	0.804	0.77	0.871	0.885	0.873	0.749	0.917	0.875	0.889	0.908	0.862	0.826		0.942	0.927	0.95	0.974	0.953	0.942		0.87	0.837	0.909	0.763	0.902
	0.777	0.76	0.934	0.823	0.845	0.804	0.835	0.883	0.894	0.889	0.891	0.811		0.974	0.984	0.92	0.93	1.017	0.962		0.905	0.836	0.813	0.83	0.945
	0.839	0.772	0.845	0.87	0.894	0.788	0.955	0.862	0.927	0.889	0.845	0.843		0.945	0.947	0.963	0.987	0.968	0.966		0.914	0.853	0.876	0.899	0.919
	1.019	0.997	1.136	0.913	0.973	0.823	0.884	0.847	0.96	0.829	0.806	0.925		1.014	1.239	0.998	0.912	1.035	0.938		0.883	0.995	0.846	0.904	0.875
	0.868	0.825	0.98	0.859	0.894	0.781	0.921	0.925	0.98	0.849	0.792	0.868		0.954	0.982	0.925	0.974	0.959	0.951		1.227	1.184	0.847	0.886	0.865
	0.855	0.808	0.894	0.843	0.874	0.799	0.904	0.903	0.934	0.862	0.797	0.852		0.908	0.97	0.946	0.947	1.071	0.973		0.882	0.871	0.896	0.885	0.85
	0.813	0.774	0.95	0.858	0.847	0.811	0.82	0.913	0.868	0.928	0.823	0.8		0.893	0.924	1	0.949	1.003	0.929		0.859	0.871	0.809	0.841	0.881
	0.784	0.774	0.866	0.901	0.847	0.866	0.865	0.836	0.852	0.929	0.828	0.848		0.91	0.917	0.93	0.978	1.031	0.923		0.842	0.812	0.841	0.841	0.944
	0.809	0.781	0.859	0.871	0.867	0.79	0.872	0.85	0.831	0.9	0.814	0.83		0.991	0.924	0.936	0.967	1.031	0.891		0.859	0.795	0.919	0.801	0.961
	0.826	0.741	0.836	0.824	0.878	0.844	0.831	0.869	0.836	0.886	0.8	0.858		0.905	0.895	0.972	0.928	0.986	0.94		0.879	0.829	0.935	0.873	0.938
	0.901	0.782	0.838	0.844	0.881	0.809	0.848	0.897	0.822	0.854	0.791	0.817		0.9	0.901	0.881	0.934	0.984	0.941		0.81	0.79	0.967	0.848	0.929
	0.855	0.831	0.932	0.93	0.927	0.801	0.85	0.885	0.873	0.88	0.826	0.855		0.94	0.905	0.93	0.881	0.972	0.948		0.86	0.837	0.987	0.823	0.903
	0.855	0.866	0.889	0.844	0.884	0.794	0.929	0.886	0.937	0.819	0.838	0.774		0.917	0.915	0.932	0.837	0.989	0.94		0.804	0.773	0.994	0.9	0.838
	0.842	0.875	0.876	0.825	0.864	0.818	0.869	0.949	0.827	0.804	0.806	0.785		0.905	0.936	0.952	0.883	1	0.887		0.849	0.802	0.913	0.88	0.857
	0.843	0.876	0.84	0.863	0.881	0.78	0.889	0.907	0.834	0.835	0.814	0.833		0.9	0.921	0.945	0.966	1.043	0.887		0.859	0.817	0.852	0.875	0.862
	0.809	0.867	0.853	0.835	0.917	0.789	0.879	0.896	0.835	0.832	0.801	0.835		0.902	0.908	0.937	0.868	0.999	0.87		0.905	0.788	0.895	0.802	0.826
	0.892	0.822	0.949	0.8	0.856	0.777	0.869	0.881	0.913	0.847	0.801	0.787		0.918	0.892	0.915	0.939	0.95	0.851		0.871	0.82	0.92	0.771	0.817
	0.843	0.847	0.875	0.831	0.862	0.868	0.807	0.905	0.979	0.908	0.8	0.786		0.939	0.864	0.955	0.871	0.921	0.832		0.902	0.778	0.835	0.798	0.811
	0.797	0.847	0.876	0.932	0.921	0.844	0.879	0.892	0.956	0.895	0.892	0.831		0.936	0.899	0.994	0.913	1.008	0.867		0.819	0.79	0.844	0.815	0.814
	0.787	0.793	0.903	0.843	0.9	0.809	0.841	0.866	0.937	0.867	0.845	0.844		0.916	0.886	0.934	0.945	1.002	0.878		0.793	0.823	0.908	0.951	0.811
	0.822	0.883	0.936	0.878	0.973	0.846	0.819	0.914	0.891	0.848	0.81	0.891		0.907	0.896	0.954	0.999	1.01	0.867		0.793	0.819	0.966	0.902	0.858
	0.873	0.819	0.899	0.858	0.973	0.969	0.832	0.858	0.909	0.852	0.84	0.868		0.922	0.88	0.991	0.933	0.951	0.895		0.815	0.841	0.978	0.906	0.934
	0.849	0.823	0.845	0.845	0.977	0.929	0.853	0.862	0.883	0.887	0.867	0.853		0.911	0.901	0.924	0.912	0.948	0.908		0.829	0.853	0.895	0.873	0.971
	0.841	0.88	0.941	0.894	1.003	0.916	0.854	0.829	0.935	0.937	0.9	0.841		0.927	0.916	0.992	0.888	0.914	0.899		0.861	0.803	0.975	0.947	0.954
	0.795	0.847	0.878	0.913	0.933	0.869	0.841	0.838	0.955	0.949	0.904	0.854		0.943	0.902	0.937	0.9	0.895	0.899		0.889	0.838	1.004	0.894	0.937
	0.851	0.879	0.908	0.838	0.908	0.913	0.832	0.908	0.899	0.932	0.85	0.845		0.933	0.901	0.966	0.948	0.887	0.934		0.825	0.812	0.982	0.922	0.925
	0.804	0.887	0.916	0.843	0.913	0.945	0.893	0.929	0.854	0.922	0.86	0.87		0.933	0.879	0.95	0.967	0.902	0.869		0.809	0.78	1.027	0.969	0.918
	0.807	0.919	0.939	0.909	0.948	0.869	0.855	0.956	0.894	0.872	0.825	0.895		0.944	0.901	0.952	0.896	0.873	0.93		0.816	0.839	0.975	0.984	0.895
	0.926	0.93	0.914	0.926	0.984	0.854	0.872	0.971	0.968	0.888	0.864	0.923		0.961	0.95	0.94	0.952	0.95	0.931		0.785	0.897	0.982	0.898	0.851
	0.886	0.951	0.977	0.86	0.961	0.944	0.9	0.994	0.917	0.883	0.883	0.907		0.957	0.895	0.942	0.934	0.967	0.929		0.91	0.981	0.982	0.881	0.871
	0.95	0.958	0.972	0.919	0.934	0.937	0.876	1.009	0.922	0.896	0.883	0.887		0.946	0.917	0.93	0.897	1.015	0.944		0.795	0.857	0.97	0.959	0.976
	0.975	0.966	0.984	0.932	0.952	0.928	0.951	0.976	0.885	0.941	0.823	0.925		0.921	0.887	0.99	0.931	0.98	0.9		0.818	0.837	0.988	0.925	1.008
20h	0.974	0.96	0.975	0.925	0.997	0.937	0.883	0.976	0.856	0.956	0.84	0.905	20h	0.969	0.908	1.02	0.904	0.963	0.904	20h	0.852	0.836	0.966	0.992	0.963
	0.984	1.001	1.007	1.003	1.016	1.023	0.923	0.921	0.852	0.9	0.814	0.888		0.969	0.944	0.958	1.063	0.947	0.916		0.899	0.861	1.023	1.026	0.932
	0.933	1.013	0.975	0.973	0.999	0.972	0.982	0.991	0.89	0.934	0.866	0.943		0.959	0.942	0.976	1	0.949	0.929		0.961	0.921	1.017	1.009	0.889
	0.985	0.981	0.957	0.97	1.005	0.965	0.998	1.046	0.98	0.979	0.944	0.963		0.95	0.928	0.977	0.92	0.986	0.952		0.92	0.958	1.064	1.026	0.954
	0.974	0.961	0.965	1	1.039	0.942	1.007	0.996	0.94	0.942	0.944	0.93		0.986	0.959	0.958	1.045	0.987	0.921		0.962	0.938	1.082	0.983	0.977
	0.97	0.97	0.984	0.941	1.066	0.982	0.942	0.96	0.929	0.916	0.854	0.922		0.953	0.942	0.971	0.946	1.019	0.93		0.978	0.963	1.011	1.046	0.996
	0.968	0.973	0.993	1.022	1.027	0.933	1.062	1.038	0.961	0.953	0.85	0.936		0.928	0.935	0.98	0.987	0.959	0.94		0.954	0.981	1.044	0.981	1.011
	1.004	0.959	0.972	0.972	1.01	0.959	0.956	1.004	0.981	0.932	0.844	0.968		0.96	0.912	0.976	0.903	0.96	0.946		0.868	0.961	1.032	1.024	1.005
	1.003	1.028	0.999	0.984	1.004	0.943	0.972	1.016	0.986	0.934	0.841	0.98		1.024	0.934	0.935	0.979	0.945	0.991		0.899	0.974	1.043	1.025	0.993
	0.995	0.968	0.984	0.965	0.989	1.014	0.982	1.001	0.985	0.905	0.817	0.947		0.997	0.965	0.984	0.946	0.973	0.959		0.984	0.969	1.013	1.029	1.022
	1.021	0.969	0.966	0.982	1.066	0.949	0.993	0.998	0.973	0.936	0.81	0.973		0.988	0.923	1.014	0.983	0.95	0.958		0.978	0.995	1.036	0.99	0.987
	0.966	0.929	0.966	0.953	0.999	0.98	0.96	1.002	0.936	0.964	0.811	0.985		0.958	0.949	0.98	0.919	1.001	0.957		0.905	0.942	1.051	1.012	1.02
	0.99	0.942	1.005	0.983	1.031	0.915	1	0.985	0.958	0.958	0.787	0.988		0.972	0.957	0.931	0.964	1.012	0.968		0.964	0.974	1.152	0.985	0.972
	1.012	0.939	0.985	0.974	1.011	0.964	0.929	1.039	0.978	0.948	0.79	0.992		0.972	0.953	0.97	0.899	0.997	0.965		0.97	1.047	1.02	1.074	1.001
	0.997	0.966	1.01	1.008	1.013	0.965	1.034	0.989	0.96	0.956	0.793	1.003		0.976	0.955	0.983	1.012	0.966	0.966		1.002	0.974	1.042	1.007	0.956
	0.986	0.905	1.027	0.954	1.017	0.973	0.991	1.062	0.983	0.972	0.798	0.987		0.976	0.929	0.97	0.97	0.967	0.942		0.986	0.989	1.044	1.006	0.926
	1.001	0.929	1.003	0.99	0.918	0.927	0.987	1.015	1.002	0.921	0.762	1.001		0.967	0.961	0.975	0.956	0.991	0.944		0.993	1.029	1.107	0.987	0.875
	1.016	0.932	0.993	0.936	0.98	0.902	0.965	1.015	0.969	0.942	0.758	0.972		0.98	0.939	0.917	0.955	0.961	0.933		1	0.989	1.012	1.047	0.945
	0.989	0.919	0.985	1.009	0.943	0.88	0.981	1.04	0.961	0.946	0.773	0.942		1.012	0.948	0.99	0.996	0.996	0.946		1.005	0.964	1.038	1.087	0.975
	1.028	0.942	1.001	0.961	0.991	0.888	1.055	1.063	0.954	0.986	0.81	0.997		0.993	0.919	0.991	0.941	0.993	0.957		0.962	0.942	1.094	0.989	0.953
	0.977	0.919	0.949	0.951	0.969	0.87	0.979	1.026	0.961	0.95	0.778	0.977		0.948	0.901	1.01	0.977	0.969	0.937		1.018	0.92	1.058	0.943	0.904
	0.977	0.918	0.98	0.959	0.979	0.903	1.035	1.086	0.968	0.91	0.784	0.969		0.966	0.945	0.968	1	1.023	0.955		1.005	0.96	1.048	0.896	0.879
	1.023	0.95	0.916	0.908	0.976	0.958	0.947	1.036	0.956	0.891	0.779	1.012		0.978	0.968	0.963	0.941	1.032	0.95		1.019	0.958	1.004	0.991	0.998
	0.982	0.928	0.967	0.975	0.991	0.893	1.008	1.024	1.002	0.919	0.799	0.997		0.99	0.981	0.967	0.991	1.013	0.98		0.992	0.969	1.087	0.889	0.993
	0.987	0.951	0.975	0.937	0.93	0.853	0.883	0.993	0.964	0.865	0.774	0.991		0.948	0.934	0.936	0.936	0.981	0.951		0.986	0.971	0.975	0.891	0.977
	0.978	0.914	0.944	0.943	0.973	0.889	1.005	0.976	0.983	0.866	0.766	0.988		0.958	0.954	0.961	0.978	0.976	0.938		1.022	0.909	1.033	0.981	0.986
	0.99	0.925	0.911	0.84	0.903	0.811	1.002	1.005	0.874	0.875	0.748	0.922		0.966	0.958	0.945	0.978	0.939	0.886		1	0.879	1.035	0.958	0.982
	0.996	0.901	0.871	0.909	0.889	0.919	0.962	0.988	0.888	0.93	0.772	0.903		0.925	0.949	0.936	0.935	0.945	1.003		0.962	0.95	0.909	0.966	0.946
	0.994	0.89	0.925	0.941	0.928	0.82	0.991	0.974	0.877	0.904	0.766	0.866		1.016	0.963	0.983	1.013	0.997	0.962		0.994	0.966	0.985	0.985	0.93
	0.972	0.838	0.875	0.911	0.873	0.81	0.912	0.986	0.855	0.867	0.762	0.878		0.97	0.909	1.001	0.943	0.962	0.96		0.908	0.952	0.942	0.949	0.914
	0.967	0.868	0.868	0.947	0.9	0.932	0.919	0.997	0.834	0.857	0.78	0.948		0.926	0.94	0.962	1.033	0.995	0.975		0.776	0.893	0.937	0.97	0.991
	0.979	0.825	0.855	0.957	0.872	0.897	1.004	0.962	0.88	0.864	0.769	0.945		0.977	0.934	0.951	1.015	0.962	0.968		0.871	0.953	0.904	0.954	0.964
	0.978	0.901	0.957	0.889	0.899	0.985	0.93	0.927	0.935	0.944	0.742	0.935		0.952	0.961	0.986	0.985	0.969	0.94		0.913	0.982	0.918	0.992	0.976
	0.963	0.915	0.957	0.965	0.921	0.926	0.917	0.992	0.947	0.961	0.764	0.938		0.926	0.956	0.989	0.977	0.936	1.013		0.94	1.003	0.867	0.931	0.985
	0.975	0.928	0.95	0.908	0.901	0.966	0.952	0.947	0.904	0.952	0.776	0.874		0.943	0.941	0.973	0.937	0.974	0.965		0.888	1.024	0.867	0.994	0.995
	0.997	0.953	0.963	0.963	0.943	1	0.978	0.928	0.967	0.877	0.755	0.909		0.933	0.945	1.007	0.994	1.016	0.973		0.883	0.985	0.975	0.95	1.005
	0.956	0.96	0.948	0.968	0.883	0.955	1.05	1.029	0.969	0.853	0.748	0.913		0.939	1.009	1.02	1.003	1.061	1.03		0.966	1.001	0.91	0.929	1.002
	0.985	0.96	0.975	0.959	0.94	0.947	0.992	0.953	0.962	0.852	0.758	0.923		0.949	0.996	0.979	0.98	1.019	0.977		0.972	0.97	0.877	0.915	0.998
	0.979	0.938	0.959	0.97	0.891	0.99	0.988	1	0.975	0.815	0.744	0.935		0.949	0.937	1.014	0.993	1.047	1.014		1.008	0.976	0.968	0.844	0.984
	0.931	0.961	0.987	0.931	0.886	0.973	0.969	0.994	0.947	0.847	0.735	0.955		0.973	0.97	1.029	0.947	1.034	0.981		0.964	0.982	0.885	0.88	1.04
8h	0.913	0.951	0.905	0.931	0.839	0.943	0.967	1.015	0.987	0.88	0.771	0.965	8h	0.931	0.94	1.012	0.92	1.031	1.032	8h	0.962	0.919	0.841	0.912	0.998
	0.944	0.906	0.932	0.951	0.838	0.982	0.964	1	0.954	0.828	0.771	0.969		0.966	0.912	0.983	0.949	1.043	1.025		0.913	0.927	0.849	0.916	0.963
	0.889	0.958	0.859	0.915	0.865	0.965	0.965	0.995	0.965	0.82	0.733	0.964		0.961	0.9	1.014	0.956	1.052	1.053		0.875	0.912	0.869	0.877	0.986
	0.882	0.934	0.886	0.87	0.834	0.937	0.921	0.989	0.923	0.828	0.733	0.917		0.904	0.954	0.99	0.955	1.01	0.981		0.917	0.94	0.866	0.863	0.998
	0.836	0.891	0.833	0.848	0.857	0.921	0.851	0.992	0.896	0.86	0.808	0.982		0.978	0.914	0.998	0.987	0.989	1.02		0.909	0.928	0.821	0.945	0.987
	0.852	0.923	0.918	0.863	0.828	0.958	0.852	0.945	0.881	0.936	0.744	0.948		0.966	0.943	0.97	0.99	0.968	1.03		0.891	0.973	0.816	0.89	0.917
	0.841	0.933	0.89	0.86	0.832	0.95	0.855	0.941	0.842	0.916	0.711	0.952		1.011	0.968	0.999	0.989	0.981	1.008		0.884	0.891	0.879	0.85	0.9
	0.824	0.96	0.977	0.786	0.916	0.966	0.82	0.954	0.829	0.897	0.724	0.896		0.999	0.968	0.933	0.936	0.991	0.938		0.9	0.944	0.854	0.867	0.941
	0.906	0.872	0.855	0.811	0.862	0.965	0.871	0.988	0.825	0.872	0.759	0.876		0.97	0.968	0.993	0.928	0.985	0.98		0.94	0.978	0.871	0.852	0.947
	0.887	0.856	0.859	0.79	0.847	0.891	0.878	0.915	0.877	0.88	0.748	0.885		0.995	0.945	0.997	0.93	0.949	0.983		0.896	0.951	0.812	0.872	0.983
	0.901	0.909	0.891	0.828	0.883	0.903	0.925	0.902	0.965	0.852	0.77	0.867		0.938	0.983	1.024	0.917	1.015	1.014		0.828	0.898	0.847	0.893	0.895
	0.906	0.858	0.879	0.803	0.858	0.911	0.955	0.958	0.933	0.812	0.763	0.898		0.94	0.991	1.025	0.974	0.986	0.937		0.822	0.884	0.885	0.9	0.876
	0.818	0.916	0.822	0.834	0.845	0.957	0.948	0.896	0.908	0.813	0.768	0.869		0.925	0.916	0.955	0.983	1.016	0.937		0.857	0.849	0.915	0.846	0.842
	0.825	0.875	0.807	0.853	0.854	0.946	0.924	0.904	0.861	0.821	0.744	0.846		0.947	0.935	0.955	0.961	0.97	1.002		0.822	0.851	0.868	0.906	0.869
	0.826	0.917	0.899	0.965	0.871	0.879	0.919	0.897	0.848	0.782	0.731	0.852		1.036	0.964	0.943	1.01	1.058	1.008		0.837	0.807	0.909	0.868	0.871
	0.893	0.906	0.932	0.869	0.856	0.916	0.944	0.872	0.89	0.821	0.734	0.882		0.975	0.983	0.941	0.922	1.024	0.957		0.794	0.819	0.891	0.835	0.86
	0.842	0.841	0.863	0.844	0.837	0.891	0.855	0.887	0.846	0.765	0.743	0.874		0.963	0.958	0.982	0.939	1.004	0.939		0.789	0.794	0.922	0.864	0.877
	0.826	0.912	0.865	0.841	0.916	0.87	0.842	0.925	0.835	0.793	0.775	0.846		0.936	0.947	1.002	0.925	0.96	0.96		0.798	0.788	0.884	0.836	0.862
	0.818	0.949	0.883	0.905	0.945	0.89	0.868	0.975	0.915	0.807	0.758	0.867		0.933	0.934	0.995	0.939	0.966	0.95		0.824	0.827	0.856	0.835	0.826
	0.815	0.875	0.933	0.907	0.898	0.844	0.881	0.908	0.94	0.867	0.761	0.871		0.959	0.923	0.913	0.957	0.941	0.96		0.783	0.923	0.867	0.815	0.833
	0.888	0.91	0.963	0.828	0.913	0.969	0.828	0.892	0.854	0.887	0.735	0.851		0.951	0.97	0.924	0.885	0.917	0.924		0.803	0.913	0.839	0.906	0.84
	0.921	0.866	0.915	0.845	0.871	0.9	0.877	0.914	0.856	0.855	0.724	0.864		0.963	0.976	0.94	0.885	0.911	0.949		0.863	0.887	0.866	0.845	0.845
	0.919	0.947	0.921	0.801	0.868	0.912	0.841	0.913	0.822	0.827	0.739	0.864		0.991	0.981	0.963	0.919	0.981	0.957		0.852	0.877	0.838	0.855	0.851
	0.92	0.866	0.917	0.84	0.856	0.935	0.845	0.955	0.837	0.826	0.738	0.841		0.965	0.972	0.991	0.964	0.967	0.92		0.918	0.883	0.836	0.857	0.846
	0.877	0.891	0.96	0.847	0.952	0.923	0.837	0.943	0.913	0.813	0.761	0.841		0.998	1.007	1.003	0.937	0.98	0.948		0.884	0.867	0.852	0.861	0.939
	0.88	0.871	0.887	0.859	0.938	0.952	0.903	0.943	0.932	0.847	0.732	0.843		0.963	0.967	0.972	0.963	0.929	0.906		0.884	0.868	0.839	0.885	0.982
	0.853	0.941	0.912	0.85	0.914	0.903	0.965	0.921	0.897	0.873	0.745	0.868		0.949	0.935	0.962	0.973	0.932	0.897		0.845	0.808	0.839	0.888	0.908
	0.873	0.909	0.879	0.799	0.894	0.966	0.927	0.905	0.908	0.897	0.758	0.831		0.935	1.044	0.937	0.963	0.941	0.897		0.851	0.827	0.865	0.904	0.918
	0.869	0.904	0.869	0.811	0.93	0.94	0.896	0.992	0.923	0.981	0.884	0.905		0.92	1.091	0.953	0.893	0.965	0.92		0.832	0.837	0.869	0.818	0.953
	0.946	0.883	0.904	0.798	0.879	0.878	0.877	0.973	0.944	0.953	0.898	0.916		0.984	0.946	0.948	0.98	0.91	0.96		0.843	0.813	0.884	0.831	0.908
	0.947	0.842	0.964	0.861	0.858	0.897	0.879	0.971	0.898	0.919	0.903	0.887		0.951	1.031	0.933	0.901	0.891	0.968		0.829	0.812	0.861	0.829	0.891
	0.901	0.848	0.933	0.902	0.971	0.985	0.859	1.013	0.842	0.859	0.926	0.862		0.943	0.966	1	0.944	0.903	0.938		0.826	0.874	0.902	0.955	0.888
	0.977	0.874	0.902	0.906	0.936	0.958	0.848	0.965	0.834	0.892	0.949	0.877		0.965	0.896	0.973	0.983	0.89	0.887		0.836	0.834	0.875	0.983	0.874
	0.958	0.863	0.87	0.836	0.9	0.939	0.969	0.983	0.852	0.947	0.968	0.857		0.939	0.941	1.001	0.928	0.951	0.911		0.826	0.841	0.861	0.913	0.976
	0.981	0.947	0.844	0.824	0.939	0.947	0.907	1.004	0.97	0.937	0.975	0.853		0.952	0.92	1.017	0.898	0.936	0.93		0.781	0.778	0.853	0.965	0.98
	0.914	0.978	0.846	0.837	0.95	0.997	0.919	0.924	0.956	0.905	0.955	0.937		0.926	0.88	1.045	0.943	0.979	0.949		0.769	0.772	0.838	0.99	0.933
	0.884	0.896	0.863	0.843	0.968	0.965	0.91	1.013	0.944	0.89	0.93	0.925		0.874	0.914	1.02	0.942	0.96	0.946		0.786	0.819	0.85	0.922	0.92
	0.875	0.925	0.913	0.871	0.946	0.974	0.984	1.008	0.918	0.897	0.962	0.996		0.911	0.95	1.035	0.947	0.956	0.98		0.774	0.749	0.789	1.006	0.873
	0.856	0.951	0.853	0.935	0.974	0.985	0.949	1.012	0.916	0.882	0.99	0.907		0.901	0.916	1.007	0.908	0.997	0.91		0.819	0.782	0.887	0.888	0.902
	0.963	0.963	0.934	0.883	0.989	0.997	0.948	0.931	0.983	0.961	0.994	0.916		0.977	0.949	1.016	0.95	0.974	0.911		0.887	0.783	0.882	0.865	0.999
20h	0.927	0.934	0.914	0.934	0.936	0.97	0.988	0.987	0.987	0.947	0.975	0.972	20h	0.963	0.919	0.972	0.967	0.921	0.923	20h	0.86	0.839	0.836	0.849	0.957
	0.92	0.94	0.864	0.99	1.029	1.006	0.931	1.007	0.951	0.926	0.984	0.959		0.951	0.934	0.979	0.919	0.917	0.955		0.924	0.891	0.941	0.954	0.956
	0.987	0.961	0.975	0.97	1.005	0.982	0.991	1.016	0.963	0.951	1.019	0.974		0.98	0.992	0.99	0.94	0.961	1.024		0.858	0.856	0.94	1.015	0.984
	0.961	0.978	0.927	0.988	1.004	0.945	1.011	1.02	0.959	0.907	0.996	0.973		0.944	0.967	0.97	0.984	0.943	0.949		0.944	0.963	1.001	0.99	1.006
	0.995	0.955	0.915	0.978	1.054	0.976	0.986	1.02	0.992	0.86	1.001	1.007		0.958	0.941	1.026	0.996	0.979	0.952		0.936	0.962	0.972	0.992	1.02
	0.98	0.991	0.958	0.996	1.027	0.986	1.018	1.053	0.972	0.915	1	1.007		0.982	0.962	0.992	0.957	1.005	0.962		0.94	0.925	0.97	1.008	1.005
	1	0.981	0.943	0.999	1.066	0.987	1.043	1.031	0.973	0.96	1.02	1.029		0.982	0.945	1.001	0.959	0.98	0.991		0.956	0.947	0.995	1.006	1.011
	0.972	0.963	0.908	0.947	1.035	1.019	0.997	1.082	0.973	0.924	1.015	1.013		0.966	0.942	1.009	0.956	0.936	0.979		0.922	0.986	0.958	1.001	1.055
	0.982	0.998	0.916	1.023	1.005	0.956	1.032	1.043	0.99	0.912	1.013	0.99		0.951	0.941	0.996	0.966	0.983	1.015		0.952	0.945	1.002	0.976	1.056
	0.975	0.983	0.955	0.952	1.068	0.985	0.956	1.055	0.979	0.864	1.003	0.997		0.989	0.994	1.019	0.938	0.991	0.956		0.979	0.974	0.955	1.011	1.021
	1.004	0.954	0.92	1.005	1.05	1.003	1.01	1.038	0.977	0.91	1.02	1.042		1.005	1.043	1.044	0.997	1.001	1.014		1.008	0.979	0.969	0.993	1.029
	0.98	0.983	0.952	0.992	1.035	0.999	1.028	1.047	0.929	0.994	1.027	1.003		0.978	0.911	0.999	0.994	1.023	0.974		0.958	0.977	1.003	1.024	1.078
	0.98	0.926	0.954	0.982	1.032	0.998	1.012	1.023	0.982	0.99	1.019	1.026		0.993	0.972	0.987	0.949	0.998	1.029		0.962	0.999	1.004	0.992	1.013
	0.99	0.97	0.981	0.976	1.054	0.981	0.991	1.07	0.962	0.945	1.017	1.037		0.971	0.967	1.04	0.938	0.988	0.982		0.965	1.01	1.011	0.996	1.017
	0.967	1.007	0.973	0.968	0.99	0.941	0.988	1.071	0.954	0.947	1.016	1.024		1.001	0.985	1.012	0.926	1.017	0.99		1.011	0.985	1.003	1.082	1.044
	0.966	0.941	0.919	0.956	1.039	0.979	1.002	1.04	0.911	0.895	1.013	1.011		0.959	0.97	1.028	0.998	0.96	1.018		0.999	0.974	1.067	1.035	1.062
	0.98	0.981	0.979	0.972	1.016	0.961	1.043	1.065	0.977	0.918	1.004	1.008		1.022	0.977	1.032	1.003	1.008	1.032		0.971	0.939	1.02	1.015	1.028
	0.998	0.96	0.905	0.974	0.989	0.964	0.972	1.067	0.973	0.98	1.023	1.04		0.955	0.959	1.031	0.962	1.01	0.956		1.006	1.014	0.97	1.056	0.992
	0.957	0.968	0.896	0.953	1.005	0.94	1.002	1.081	0.944	0.963	1.014	1.043		0.949	0.968	1.025	1.007	1.004	1.011		0.958	1.017	0.93	0.998	0.962
	0.986	0.965	0.868	0.923	1.012	0.932	0.983	1.051	0.967	0.95	1.001	1.026		0.987	1.095	1.069	0.941	1.022	1.079		0.969	0.954	0.844	0.958	1
	0.983	0.966	0.894	0.973	1.005	0.912	0.984	1.047	0.942	0.924	1.046	1.012		0.965	0.901	1.051	0.976	0.99	1.046		0.997	0.993	1.01	0.946	0.996
	0.965	0.99	0.895	0.928	0.997	0.934	0.931	1.056	0.932	0.927	1.018	1.022		1.046	0.918	1.004	0.962	1.036	0.985		0.955	0.94	0.922	0.986	1.068
	0.927	0.996	0.85	0.925	0.954	0.916	0.962	0.992	0.946	0.911	1.059	1.089		1.027	0.924	1.008	0.976	1.043	0.983		1.038	0.969	1.012	0.889	1.015
	0.938	1.013	0.892	0.813	0.925	0.94	0.852	1.015	0.902	0.952	1.057	1.065		1.023	0.949	0.981	0.924	0.996	1.034		0.97	0.928	0.919	0.975	0.978
	0.828	0.953	0.898	0.865	0.945	0.94	0.905	0.999	0.833	0.955	1.03	1.034		0.977	0.947	1.008	1.056	0.982	0.999		1.043	0.987	0.921	1.02	0.926
	0.849	0.943	0.868	0.837	0.946	0.893	0.874	0.982	0.865	0.939	1.03	1.007		0.981	0.946	1.019	0.968	1.035	0.998		0.983	0.931	0.904	0.987	0.973
	0.826	0.929	0.799	0.935	0.921	0.907	0.972	0.973	0.882	0.884	1.012	0.992		0.958	1.01	0.98	0.956	1.014	1.038		1.011	0.95	0.936	0.989	0.972
	0.98	0.911	0.812	0.974	0.915	0.958	0.907	0.985	0.867	0.879	1.013	1.025		0.976	0.971	1.016	0.959	1.035	0.96		0.951	0.959	0.881	0.955	0.931
	0.941	0.835	0.8	0.835	0.943	0.961	0.867	0.953	0.958	0.885	1.025	0.997		0.97	0.914	1.023	0.938	1.009	1.061		0.989	0.929	0.804	1.02	0.886
	0.968	0.934	0.888	0.847	0.931	0.956	0.947	0.908	0.883	0.868	1.023	0.995		1.052	0.986	1.005	0.976	1.004	1.049		0.959	0.887	0.921	1.051	0.893
	0.932	0.915	0.799	0.866	0.855	0.91	0.947	0.939	0.899	0.876	1.015	0.953		0.996	0.955	0.997	0.998	0.997	1.024		1.03	0.965	0.922	0.99	0.928
	0.962	0.93	0.899	0.878	0.929	0.931	0.894	0.935	0.927	0.935	1.034	1.004		0.943	0.955	1.039	0.956	0.933	0.993		0.96	1.004	0.969	0.961	0.937
	0.888	0.95	0.867	0.93	0.958	0.92	0.932	0.898	0.953	0.894	1.06	0.976		0.98	0.927	1.004	0.979	0.942	1.016		0.964	1.008	0.919	1.017	0.945
	0.94	0.916	0.918	0.929	1.028	0.983	0.948	0.867	0.947	0.897	1.073	1.012		0.981	0.973	0.957	0.893	1.002	1.023		0.868	0.949	0.807	0.979	0.922
	0.954	0.952	0.892	0.913	0.97	0.995	0.97	0.911	0.94	0.882	1.042	1.008		1.017	0.95	1.003	1.004	0.99	0.942		0.853	0.97	0.885	1.002	0.966
	0.981	0.995	0.953	0.983	0.997	0.976	0.986	0.936	0.959	0.968	1.053	1.029		1.023	0.955	1.056	0.975	0.983	0.946		0.958	0.943	0.884	1.001	1.024
	0.979	0.981	0.921	0.946	1.036	0.949	0.983	0.906	0.957	0.916	1.041	0.985		0.95	0.96	0.992	1.021	1.025	0.965		0.967	1.005	0.925	0.938	0.985
	0.928	0.973	0.933	0.932	0.991	0.969	1.003	0.954	0.986	0.959	1.018	0.996		0.933	0.934	1.035	0.956	0.97	0.968		0.958	0.989	0.932	1.068	0.979
	0.934	1.029	0.977	0.939	1.008	0.937	1	0.979	0.946	0.926	1.01	1.026		1.022	0.989	1.075	1.007	1.074	1.015		0.952	0.979	0.962	0.925	1.012
	0.852	0.958	0.88	0.899	1.06	0.974	0.979	1.003	0.906	0.933	1.019	0.957		1.016	0.964	1.027	0.919	1.049	0.984		0.977	0.876	0.991		1.007
8h													8h							8h
18h*													18h*							18h*
20h													20h							20h
8h													8h							8h

## Sheet: Fig S1I
Mean ambulatory activity
Dark phase				Light phase				24h
Ubi	LepRNull	Ubi-LepRNull		Ubi	LepRNull	Ubi-LepRNull		Ubi	LepRNull	Ubi-LepRNull
18868	2612.75	12411		5664.33	1844.33	3954		23661.7	4353.33	17816.7
23142	2493.25	8623.25		8298.67	1740.67	2803		32942.7	4352.33	11790.7
12464	2237.75	12000.2		5114.33	1381	3914.67		17542.7	3404.33	15568
28050.2	2388	12925.2		8234.33	1784.67	3151		36084.7	3842	17014
15864.5	2940	13828		4515	1794.33	6825.33		21055.3	4689.33	19768
18269	1481.75			5739.33	886			24756	2278.33
16694	2036			5931.33	1400			21195	3389.67
11942.8				5944.33				17347
20784.5				11222.7				35064.7
14880.2				10060.7				25821
24311				6922				31098.7
16094.5				7713.33				24055.3

## Sheet: Fig S1J
Ambulatory activity
Time of day	Ubi												Time of day	LepRNull							Time of day	Ubi-LepRNull
18h	199	605	5	21	291	163	7	0	3	13	16	476	18h	49	244	2	365	2	8	3	18h	35	412	30	16	11
	11	129	4	349	480	33	91	112	159	27	0	1951		0	2	151	43	2	0	1		57	178	300	17	45
	22	3	1	9	38	222	42	286	9	306	11	563		0	21	29	0	114	0	33		7	3	16	165	352
	100	224	360	38	13	270	33	255	27	20	4	612		23	16	0	32	131	69	41		15	7	7	39	555
	300	47	5	50	68	7	137	204	5	13	359	37		47	54	0	132	66	120	65		10	31	153	5	22
	97	4	9	254	102	19	11	20	132	23	568	9		221	77	71	80	0	22	0		114	34	13	9	41
20h	141	220	137	197	40	8	70	183	51	47	15	172	20h	84	15	136	0	56	4	0	20h	164	532	0	149	26
	161	13	58	535	56	78	603	372	9	542	2	146		4	77	93	67	126	3	6		17	6	473	211	239
	95	170	367	984	931	344	389	531	315	51	14	11		88	127	169	248	26	49	151		120	22	626	366	658
	221	1269	228	1523	98	2203	17	608	484	29	488	33		156	202	0	107	84	130	116		282	447	373	727	419
	651	1719	304	1151	1269	653	873	200	24	754	364	632		88	14	68	23	205	42	3		3	184	336	161	417
	306	129	3	1484	568	1750	697	339	193	1144	178	427		0	36	90	199	53	3	29		351	20	6	207	17
	359	1	404	281	452	445	122	256	1547	237	27	988		14	106	0	183	0	0	88		20	8	369	123	819
	108	263	102	56	6	7	87	111	722	19	265	379		94	12	48	165	154	0	74		137	6	405	16	642
	253	701	347	693	121	57	208	43	7	6	562	158		92	117	150	0	128	5	5		174	198	11	294	564
	159	59	465	283	263	719	183	410	96	2	955	10		79	180	20	57	8	9	1		12	405	379	420	35
	16	133	471	1146	215	10	949	320	6	186	197	226		1	5	8	0	2	36	91		285	50	443	60	3
	235	185	20	562	55	14	814	315	45	1537	13	361		53	5	0	0	163	158	73		421	5	486	59	158
	85	884	392	151	65	90	634	300	268	322	350	449		170	102	75	55	2	52	5		57	257	10	23	672
	138	595	626	32	558	1021	1043	195	745	252	1072	792		156	10	160	163	97	2	2		331	404	246	133	565
	78	82	140	68	971	638	694	175	38	5	645	327		216	21	68	29	162	34	22		145	24	927	503	66
	56	169	143	288	1266	68	712	496	292	2	536	291		54	21	7	2	128	145	150		60	5	474	207	12
	142	711	274	833	694	15	49	307	1180	13	7	21		2	3	0	0	0	79	56		163	10	519	950	30
	811	903	14	950	178	52	35	197	667	9	251	139		91	137	86	9	4	32	13		4	123	284	39	83
	745	896	68	264	12	1149	392	249	358	492	438	388		44	120	145	185	25	1	31		93	398	56	182	265
	495	881	80	24	19	490	1393	279	310	1291	53	482		1	0	50	185	207	17	55		366	211	6	3	1233
	1208	1550	12	95	152	221	1000	739	2	401	68	338		0	24	12	19	113	7	139		563	9	84	16	542
	1186	523	716	952	29	4	520	328	126	362	65	35		3	31	11	0	17	9	66		296	11	168	46	8
	1248	958	182	389	34	12	118	285	34	405	560	15		116	60	0	26	9	7	13		15	20	8	10	193
	773	739	13	113	12	37	91	396	56	7	1720	107		151	69	39	193	10	102	7		14	0	9	131	1
	1625	327	19	97	18	163	818	419	20	3	1401	12		49	3	9	33	97	62	4		82	201	298	571	434
	1212	6	205	763	173	37	196	188	51	18	785	47		0	1	252	1	143	47	6		26	108	349	17	762
	1622	163	140	674	9	19	40	434	141	1	466	71		56	84	95	84	51	1	94		43	17	38	188	534
	1228	12	4	850	19	506	224	193	128	10	50	82		151	126	0	181	15	4	11		210	4	9	44	17
	531	31	129	356	171	237	227	39	246	104	13	299		151	3	6	70	100	46	56		160	309	17	18	0
	1104	232	997	1460	87	27	84	217	166	69	485	543		21	14	134	1	181	125	15		12	310	79	1124	9
	425	144	487	841	14	183	134	336	21	79	760	370		2	53	83	5	139	87	0		41	652	428	746	6
	860	126	713	1255	293	728	813	226	8	13	802	287		0	209	3	167	6	31	99		128	25	546	334	206
	1036	494	746	1224	332	743	520	572	88	348	1441	149		139	18	23	81	26	12	108		436	204	678	666	1043
	744	59	643	1286	97	1088	606	342	16	475	1363	348		78	15	175	265	135	99	39		301	472	301	365	1006
	370	873	739	1622	1054	574	1416	754	683	740	1424	227		6	22	81	80	104	71	58		70	428	226	26	873
	261	1045	279	1261	592	88	1212	469	1230	62	1415	989		73	60	183	171	1	111	154		303	472	392	157	958
	167	537	16	1855	655	440	1138	269	409	3	1169	1134		254	1	199	162	106	32	19		449	345	1434	716	1088
	133	333	513	775	1045	903	780	288	5	74	1694	1380		118	0	9	91	169	74	77		645	470	934	45	767
	245	99	1055	702	747	201	237	962	263	674	1287	1585		69	29	39	73	18	18	91		544	148	427	3	778
	247	402	320	575	467	4	847	221	562	1452	1314	902		0	6	155	0	5	4	148		513	10	187	56	336
8h	176	517	17	653	687	23	412	270	1390	1219	764	1495	8h	87	72	10	14	64	6	113	8h	478	13	32	24	31
	103	27	2	89	628	72	39	123	562	985	1096	1223		16	0	15	52	32	14	30		154	17	3	103	30
	54	193	348	55	47	329	141	198	1319	1193	891	756		14	1	12	38	0	16	2		6	117	309	497	223
	33	130	223	1118	70	522	183	73	221	1290	712	29		9	3	98	110	55	57	57		183	33	479	167	749
	74	48	37	400	6	280	154	213	14	483	814	15		138	58	0	90	151	74	41		6	2	14	11	567
	550	566	10	23	9	7	47	50	87	913	180	1		118	1	22	2	10	38	3		9	41	9	31	26
	12	61	109	32	133	20	143	208	37	819	29	17		7	18	141	9	2	0	5		70	12	7	62	80
	58	42	159	192	9	19	26	168	396	578	0	122		0	124	62	31	21	3	0		575	19	1	11	21
	92	5	11	445	26	66	46	155	559	635	40	14		0	3	2	117	162	5	28		225	81	325	15	453
	36	561	211	43	151	44	239	181	475	117	243	11		82	18	10	52	52	10	67		17	334	63	17	644
	18	766	21	2	37	74	2	95	534	6	694	185		172	73	89	107	13	83	135		79	177	11	134	90
	7	171	185	157	107	472	25	187	88	5	122	321		12	27	11	53	1	74	42		20	7	11	71	13
	42	10	19	8	33	168	50	188	9	19	13	34		0	0	1	24	65	0	20		15	11	159	6	10
	197	111	77	54	7	10	122	111	168	58	16	6		0	0	82	103	130	0	20		8	62	264	11	21
	23	400	44	374	63	27	26	47	5	278	9	17		116	58	88	43	5	6	10		78	20	19	36	9
	90	889	92	1214	530	49	17	145	72	724	2	7		91	120	0	0	4	126	4		4	17	4	23	445
	1011	12	400	232	849	31	28	238	175	51	175	18		3	8	4	9	1	23	25		10	1	56	0	494
	288	76	153	18	316	144	139	133	4	7	82	26		2	130	14	82	22	6	61		24	133	12	38	77
	18	71	38	18	4	25	16	129	11	3	1	16		5	60	184	39	238	3	3		595	420	7	147	14
	7	10	86	62	21	27	188	16	101	25	6	8		119	1	8	0	24	3	22		22	7	279	16	24
	55	16	17	25	17	69	441	44	11	2	4	79		180	0	21	14	15	0	95		12	21	20	7	132
	18	243	75	24	32	183	21	34	2	30	12	528		108	41	5	42	94	66	29		5	21	15	3	59
	11	21	43	30	9	10	8	47	263	4	10	487		6	121	0	47	78	54	29		111	3	6	171	25
	93	0	53	36	134	4	8	8	50	172	0	9		13	6	61	0	3	25	11		280	27	159	117	14
	266	17	218	203	45	137	35	9	5	1073	1	437		0	65	90	7	1	0	2		18	10	334	9	1084
	17	86	10	52	3	336	91	37	1179	925	667	1026		34	1	2	55	0	3	237		7	129	23	28	432
	7	144	72	53	196	520	40	14	799	69	175	226		197	26	3	3	116	3	249		4	43	10	20	133
	83	15	283	5	13	39	217	184	160	14	18	75		18	16	16	0	11	12	130		7	20	11	46	22
	641	58	54	7	20	36	10	213	6	14	1	1		2	4	1	0	12	4	12		143	9	7	544	15
	242	55	7	353	32	29	14	148	14	5	1	7		0	167	1	19	9	7	27		88	7	99	47	55
	9	2	9	458	126	31	6	15	47	6	10	52		0	8	60	39	87	0	75		1	234	1	1	296
	21	212	83	40	20	54	234	20	699	59	8	194		28	3	80	0	96	5	8		27	179	252	5	92
	1	669	141	4	1	507	904	32	303	9	19	11		164	46	58	2	0	28	8		249	14	108	5	23
	78	121	366	18	131	5	52	58	76	143	2	6		78	13	0	27	45	83	125		39	2	11	31	13
	140	25	24	52	168	65	9	136	7	325	15	4		75	71	1	113	142	1	1		11	18	20	188	13
	56	1	6	267	1	20	69	175	3	212	3	0		86	266	0	37	15	1	197		51	8	38	87	8
	0	165	17	8	10	50	71	396	14	2	118	69		0	30	59	185	19	0	143		131	94	275	7	46
	134	247	42	13	157	354	16	217	87	16	835	220		3	7	107	67	21	0	19		12	76	45	52	219
	329	287	170	197	105	11	91	311	58	1	60	14		82	210	24	150	141	0	26		3	1	58	23	533
	68	547	38	89	48	5	30	336	185	10	0	30		102	44	125	0	15	92	49		44	0	174	91	3
20h	165	446	13	197	255	54	279	202	18	336	3	81	20h	151	24	98	89	70	58	123	20h	909	506	33	85	20
	122	449	131	757	540	565	420	224	59	240	4	259		10	26	7	188	100	15	3		260	668	371	359	219
	409	135	770	1739	902	75	290	257	465	2	83	13		64	45	79	155	37	0	61		28	55	854	808	537
	750	8	54	991	1647	1054	241	303	1418	736	500	127		156	227	81	178	65	29	45		208	11	483	271	432
	339	146	4	1562	1343	1279	1585	474	982	1277	529	1066		16	70	2	129	143	133	67		713	290	245	31	197
	864	1520	136	1165	817	553	937	416	32	363	11	240		96	112	65	138	94	105	291		33	353	83	389	30
	672	951	5	954	1042	1183	170	308	783	33	433	38		124	148	104	0	0	25	36		259	51	132	80	170
	147	93	56	692	704	31	23	315	1597	1	622	25		0	49	1	5	7	1	0		427	29	887	8	729
	39	102	912	297	138	35	8	328	919	68	16	98		125	20	31	2	239	0	33		147	16	219	442	665
	285	44	74	56	0	93	109	487	492	457	24	793		186	27	106	65	123	0	120		8	26	679	1008	410
	151	210	10	82	234	1223	80	446	13	0	148	795		11	28	77	98	90	3	46		268	265	0	514	66
	50	529	23	1617	30	501	726	464	112	13	814	338		0	173	70	32	1	94	33		820	678	27	5	41
	1265	991	518	1366	208	27	802	338	475	474	1191	346		40	41	144	0	11	60	119		134	752	989	93	129
	339	127	569	1489	53	3	1426	468	3	1342	1056	7		21	206	42	0	4	104	43		88	354	719	191	688
	51	608	184	745	459	854	156	334	2	173	271	188		233	55	16	1	161	43	85		547	32	397	100	711
	162	696	29	22	1426	1251	82	20	82	10	7	616		115	160	1	6	87	62	81		866	10	165	1275	839
	57	1686	198	12	877	1131	95	377	744	3	20	1087		1	113	3	106	102	0	273		1509	17	223	265	459
	60	928	219	75	1193	364	1150	194	986	48	303	1204		50	1	92	45	0	21	25		449	62	27	29	471
	6	723	60	28	1151	6	1358	305	908	679	428	275		66	0	8	0	4	68	21		157	11	74	6	10
	226	294	6	891	725	9	683	758	1146	1235	214	369		2	0	9	3	175	9	2		63	231	2	38	8
	899	923	15	904	250	1159	189	259	863	1070	186	1199		27	127	50	45	97	5	39		341	280	19	183	34
	486	2078	5	206	2	906	54	426	815	375	64	114		214	21	0	0	31	0	66		126	26	20	31	79
	538	1400	301	167	9	16	12	271	444	3	40	8		119	63	37	116	153	4	0		69	2	431	0	327
	125	1202	370	29	81	73	8	638	56	9	101	15		16	204	119	105	134	0	2		9	10	36	29	1037
	12	231	27	21	15	920	106	556	39	17	840	40		85	0	41	97	94	9	45		175	73	60	164	394
	362	191	9	56	24	777	2	372	7	2	1271	79		86	90	0	1	150	40	24		123	374	0	21	242
	731	624	8	413	119	51	35	434	10	62	916	23		0	179	1	5	41	44	38		0	313	19	8	0
	558	604	205	533	58	977	180	291	4	23	645	121		0	2	67	133	32	121	0		1	23	67	100	21
	396	1061	20	799	2	807	71	165	92	25	32	246		6	61	54	75	117	2	6		69	26	60	285	37
	16	938	93	56	62	903	15	233	4	484	80	11		78	96	0	26	66	0	71		9	90	15	978	130
	94	972	703	17	95	1566	99	308	98	695	23	10		108	4	11	34	95	2	34		281	295	96	222	263
	10	987	578	292	44	1133	1187	314	779	82	269	62		56	2	116	85	31	3	116		227	492	346	304	571
	364	1543	315	910	79	1184	324	319	128	20	1174	382		0	37	105	172	77	22	0		24	71	181	2	662
	1436	1730	39	1042	702	1777	23	147	68	18	1431	1083		165	92	61	206	88	19	35		71	234	10	539	492
	1495	1371	279	1127	749	1153	415	251	128	125	900	270		136	91	34	2	50	45	23		202	589	649	854	26
	1285	1655	1377	1577	1175	1193	860	908	1178	632	1235	233		7	20	97	115	5	108	70		4	831	328	1095	350
	546	917	883	1065	725	304	903	328	1080	564	1148	112		145	70	73	163	111	100	9		351	519	202	404	736
	549	236	525	1720	867	27	1175	483	995	288	1590	1416		163	12	116	129	44	65	137		1142	445	263	123	519
	413	607	206	876	602	261	246	729	18	520	969	1485		14	30	26	4	7	28	22		777	276	734	24	765
	8	1301	0	888	383	135	5	333	82	7	1276	1565		23	108	2	0	34	5	37		1017	250	608	19	406
8h	16	700	177	1045	378	181	786	209	22	5	216	2116	8h	0	13	0	125	80	1	26	8h	608	202	131	1	79
	79	344	45	226	401	120	1249	446	662	412	20	960		149	19	54	5	70	1	0		270	56	14	178	35
	34	121	63	44	40	133	798	583	1466	751	4	1343		164	29	4	152	0	1	17		24	8	5	92	395
	5	510	548	20	16	1027	171	90	908	2046	294	158		1	16	60	3	0	2	7		5	12	139	18	680
	16	261	425	31	76	65	12	340	127	615	369	20		0	5	51	2	56	1	0		95	11	34	1	17
	148	187	49	457	11	33	500	112	59	848	13	22		1	9	5	6	6	0	0		354	132	10	36	13
	126	172	17	768	85	193	62	255	4	665	8	56		2	219	5	0	1	2	71		159	179	1	14	13
	22	90	29	152	11	31	8	41	153	653	21	12		0	67	75	0	180	3	22		15	7	174	67	199
	4	551	65	34	6	93	12	74	22	129	281	6		43	1	37	22	61	73	1		3	0	241	6	828
	23	4	248	147	15	45	122	95	89	9	788	11		148	0	10	73	27	71	0		29	77	28	177	470
	272	9	66	268	151	248	258	52	101	18	219	158		119	94	24	1	5	54	31		408	5	2	150	44
	76	60	85	55	246	3	16	105	982	18	6	965		0	26	20	19	1	3	76		38	31	49	0	27
	29	163	37	44	42	8	25	577	554	20	15	59		15	68	0	199	2	35	68		114	12	5	34	39
	11	16	36	47	139	7	583	519	626	377	1	9		0	18	0	131	64	30	0		12	41	11	8	62
	289	43	417	432	14	322	57	31	28	434	163	22		51	10	162	149	119	74	0		1	12	0	184	212
	5	755	217	928	3	4	17	56	21	566	581	22		136	38	78	5	55	17	0		48	36	293	11	548
	7	26	14	31	78	3	14	15	60	540	68	9		10	146	33	0	15	2	0		364	354	682	24	802
	91	2	20	24	9	14	151	17	13	96	17	503		3	6	6	3	31	3	40		7	252	248	18	310
	663	118	82	4	242	29	105	104	7	0	9	138		4	0	0	75	2	2	109		36	278	42	0	38
	285	8	485	551	189	5	29	190	194	34	169	10		134	6	1	145	0	4	42		31	26	14	67	18
	20	214	616	92	0	166	176	159	164	4	439	16		51	62	0	137	1	1	4		7	19	9	326	49
	14	84	28	27	101	10	24	78	15	8	18	6		1	0	46	157	59	123	0		37	11	11	34	33
	15	566	20	79	2	1	0	19	8	8	14	1		0	9	115	112	70	24	3		342	17	21	5	40
	88	43	23	155	52	26	16	16	36	0	2	43		1	0	0	74	88	1	22		2	142	13	10	245
	238	5	319	13	61	2	297	45	302	157	5	4		88	22	0	61	0	1	0		9	78	9	1	17
	72	18	30	53	2	502	21	6	1068	363	232	28		160	1	3	5	0	2	0		16	17	5	10	5
	12	50	2	540	49	144	58	22	313	40	79	12		10	2	22	20	80	12	40		355	24	130	41	12
	13	91	457	127	76	8	145	76	18	10	7	172		0	210	63	101	55	53	64		43	14	357	157	23
	81	175	387	14	19	5	8	16	16	6	8	619		1	57	0	0	32	11	1		5	393	408	13	239
	747	16	114	79	165	100	204	33	62	0	3	88		10	119	0	1	67	0	0		26	358	32	175	480
	208	8	11	679	378	1018	319	21	30	118	166	2		1	0	44	107	68	1	27		58	70	381	400	407
	4	192	71	1134	48	217	445	20	228	384	280	13		125	2	27	62	43	0	0		308	1	80	167	39
	9	3	18	462	7	10	81	41	709	948	9	4		218	0	0	9	3	0	0		12	17	24	31	7
	41	62	33	55	78	306	9	125	63	77	19	7		89	21	0	0	3	1	107		4	19	80	70	29
	16	613	67	29	8	270	251	177	8	0	1	95		1	8	5	0	107	0	21		16	7	107	323	105
	227	623	362	116	471	9	1	358	232	1	2	331		1	58	9	98	82	17	168		14	182	8	5	32
	610	227	53	12	106	15	5	121	1039	1	52	251		0	14	190	69	7	49	10		173	52	11	48	24
	673	105	168	21	19	210	131	94	133	12	1000	11		33	28	32	95	1	127	0		178	26	158	118	269
	968	743	582	204	106	484	43	10	11	160	240	6		171	294	166	0	6	20	0		11	87	103	79	464
	147	4	34	109	366	4	220	55	71	223	0	8		109	96	21	17	42	1	0		16	34	128	122	71
20h	14	30	9	41	6	79	5	36	12	11	1	3	20h	25	29	0	115	65	9	29	20h	95	2	185	131	24
	29	195	38	450	439	1304	223	121	34	32	1	71		4	27	86	7	28	30	107		392	43	208	999	76
	329	661	270	1746	1310	176	632	431	226	628	719	386		209	140	71	72	137	80	1		8	593	547	1381	1359
	1653	1319	396	1039	324	62	808	202	891	1240	424	24		62	111	21	163	43	63	24		613	140	354	134	891
	854	419	527	1176	487	991	970	276	1155	483	1340	28		45	3	36	25	43	15	158		163	178	323	568	473
	928	202	105	337	284	936	86	110	57	161	657	280		174	87	27	2	106	4	175		13	413	201	1148	11
	253	27	67	106	343	134	161	68	1998	876	287	1323		104	147	61	88	165	7	37		9	51	572	413	79
	86	319	73	660	1316	4	213	99	1306	1622	371	272		7	51	70	123	82	8	17		20	85	4	23	1534
	130	201	812	982	92	138	8	363	1494	214	1487	121		53	2	8	20	8	75	26		572	486	385	196	312
	258	614	118	211	14	814	154	127	613	35	1588	255		260	2	8	9	1	34	66		827	410	577	767	101
	1504	328	48	95	168	79	117	186	307	678	1345	85		185	85	199	23	99	63	0		816	17	823	1063	44
	537	1513	975	31	75	164	617	216	11	119	783	857		28	23	128	68	131	25	108		89	52	35	933	631
	92	446	549	58	794	103	154	519	41	407	69	410		0	9	13	129	0	0	30		54	191	41	94	640
	335	8	234	547	998	998	6	106	51	1126	0	18		132	56	6	1	2	0	178		5	668	163	6	19
	543	92	17	784	433	1104	368	126	251	287	4	274		150	2	109	0	0	0	0		193	289	996	244	50
	104	45	304	1425	168	825	1179	530	2206	358	22	428		1	2	138	1	50	0	1		1013	20	32	2000	110
	59	1060	892	653	25	15	1200	417	1129	955	1459	832		8	100	1	91	120	3	38		817	19	9	815	391
	123	1430	92	1024	183	13	907	132	748	1208	1503	127		3	22	3	54	196	22	64		453	0	111	47	850
	27	1765	17	466	1709	8	44	79	22	999	1110	16		77	18	50	2	21	109	31		789	19	380	24	148
	108	1179	115	24	263	79	75	42	13	89	1656	1074		16	177	0	4	5	74	44		160	352	13	5	9
	381	1209	27	33	47	208	65	133	138	17	838	762		126	81	0	50	42	27	74		63	194	5	10	17
	20	910	41	94	73	749	78	141	673	12	19	1436		164	0	40	89	29	1	6		678	16	55	231	950
	347	262	40	219	385	50	7	216	2593	43	5	589		18	11	108	1	97	0	2		1710	9	126	242	679
	2224	128	171	25	623	27	10	308	1395	83	35	55		5	47	12	1	3	2	14		250	19	72	5	534
	519	172	374	181	1246	5	171	73	199	15	1738	6		2	52	0	17	3	1	35		26	149	4	64	221
	90	172	137	139	219	17	0	135	18	20	2294	73		144	15	16	0	94	7	107		7	127	16	81	2
	14	134	28	21	19	25	394	143	69	152	2243	114		57	7	66	154	117	19	0		3	373	26	152	23
	314	8	22	147	128	462	814	374	24	1073	1212	1		53	149	12	82	89	84	0		67	133	143	299	7
	1467	56	46	90	189	82	585	205	97	66	1792	49		41	30	5	1	4	48	0		61	114	7	6	644
	553	61	42	397	407	178	34	652	130	49	1423	172		15	30	94	85	1	49	3		67	531	368	8	2465
	1175	407	31	812	212	759	18	14	12	144	1222	1397		13	41	46	123	28	0	5		3	96	99	554	341
	528	4	401	170	661	155	71	19	291	481	1509	229		23	106	7	103	151	10	91		328	576	52	1183	231
	253	382	458	23	240	250	25	74	1571	1070	306	32		137	49	0	4	189	9	73		639	362	29	820	37
	6	1952	315	307	513	1428	817	19	398	375	5	49		121	28	160	82	122	36	11		6	157	452	827	476
	271	375	500	1411	713	1075	1026	66	894	199	13	9		65	5	89	191	9	17	15		9	83	705	457	1707
	1326	515	436	1236	530	485	906	88	1710	1152	1473	924		4	126	97	195	31	55	51		406	665	215	255	532
	709	963	631	2146	172	1805	155	72	1717	933	1600	1927		41	7	71	87	21	35	4		983	556	933	39	820
	285	1092	517	1233	279	326	100	124	750	259	1143	1377		71	8	194	42	7	41	33		658	315	804	24	517
	32	1389	812	1096	64	7	180	807	978	1739	529	938		0	52	111	1	70	32	31		482	631	318	35	301
	99	652	54	477	320	100	1032	274	1390	704	8	1132		94	28	4	47	157	21	69		1210	469	39	323	4
8h	426	878	0	1268	73	649	807	153	975	322	3	1169	8h	86	46	132	109	58	0	26	8h	346	121	12	183	6
	122	995	165	851	149	243	599	226	949	19	639	1055		16	0	5	19	4	10	1		32	10	6	12	257
	15	113	14	290	188	11	413	379	1173	3	378	210		0	21	0	0	84	0	15		13	0	1	6	218
	13	4	33	7	28	5	50	212	281	63	4	979		78	10	31	28	77	0	102		122	10	198	49	49
	9	53	50	37	73	25	2	330	47	849	30	284		128	3	126	16	3	0	22		3	49	156	85	30
	156	160	680	60	116	89	68	435	21	545	939	31		33	49	0	1	2	0	1		40	22	3	21	78
	39	287	515	173	54	307	49	150	41	1063	100	1		2	34	0	1	90	0	0		73	177	1	157	281
	144	180	125	50	177	592	4	183	26	626	8	22		6	69	1	31	75	0	50		317	286	65	13	462
	206	103	9	222	83	289	39	301	16	466	3	41		2	83	65	109	1	0	5		672	69	234	128	384
	6	172	43	10	22	8	593	594	1277	53	12	12		23	50	128	85	6	55	2		27	14	5	222	26
	108	87	54	64	143	19	592	143	977	47	9	13		0	2	8	0	0	42	0		15	30	46	5	14
	229	54	210	270	610	311	20	105	303	1	80	58		2	168	7	3	77	85	32		1	194	240	9	93
	35	354	19	13	14	650	17	57	0	28	533	3		100	1	6	7	83	26	26		12	9	15	65	16
	44	1045	20	103	10	154	8	12	31	80	76	9		95	0	77	0	3	40	13		3	23	14	462	33
	13	708	264	20	75	11	26	30	17	4	0	293		4	1	13	63	36	1	0		187	41	19	50	26
	392	338	51	16	0	17	85	39	94	51	30	604		1	1	3	127	2	0	0		113	30	355	3	47
	109	58	4	116	81	42	4	17	86	6	2	14		1	111	16	0	25	0	0		8	37	349	79	121
	4	146	6	43	76	57	275	223	38	6	6	2		1	19	1	0	59	0	3		8	11	10	21	31
	4	7	35	856	18	135	277	26	956	19	9	10		0	24	4	69	54	0	4		5	244	94	10	37
	11	193	233	570	17	4	4	11	418	489	46	3		28	52	2	10	6	5	42		132	69	10	84	15
	128	266	9	35	4	294	3	15	16	129	285	9		0	7	0	14	3	3	46		3	9	135	12	14
	204	10	19	18	85	453	117	3	29	4	16	99		106	9	61	47	1	7	116		23	116	28	25	30
	1001	115	39	18	63	26	28	48	22	8	17	11		92	1	90	96	42	49	154		220	22	13	34	232
	355	6	38	240	167	15	247	159	20	9	10	7		20	110	23	4	76	43	209		219	11	12	10	621
	10	32	65	8	7	26	3	5	222	13	42	14		3	95	10	1	94	20	0		0	73	12	70	514
	12	1	7	163	6	31	246	20	60	34	247	5		0	23	0	0	6	5	5		4	107	132	188	34
	2	212	33	751	36	60	143	94	2	55	17	200		15	2	0	0	45	0	0		10	22	380	1	69
	23	194	11	63	168	152	7	182	623	531	462	447		3	0	5	0	106	9	53		25	26	33	19	902
	85	45	116	7	125	128	13	296	1906	639	692	592		2	2	3	1	9	1	45		27	82	11	47	160
	230	192	578	15	10	52	7	218	495	38	583	92		34	3	12	54	19	1	50		22	143	38	83	11
	6	9	71	152	402	472	38	372	50	20	370	61		84	0	1	110	6	0	0		7	3	21	421	48
	420	525	445	866	622	408	379	538	24	11	12	9		62	87	128	107	135	0	3		5	39	531	144	13
	136	347	469	118	39	16	195	307	19	116	28	97		0	77	52	70	114	2	0		722	383	165	60	275
	231	31	68	13	0	13	210	288	133	156	88	2		1	7	7	0	41	55	9		94	69	15	3	326
	43	180	6	32	81	23	14	281	678	23	482	39		52	180	0	0	7	92	27		1	12	56	133	55
	25	530	17	140	224	139	3	205	26	2	363	359		34	0	0	86	45	195	0		6	12	104	2	15
	10	490	64	4	67	5	121	299	4	9	17	143		9	0	52	42	83	45	0		23	40	21	4	9
	31	3	150	171	11	12	119	4	16	48	0	6		110	10	113	0	126	92	0		7	30	124	292	7
	177	107	9	416	136	57	1	55	87	50	76	12		83	89	10	22	23	18	0		175	4	138	115	141
	217	87	109	3	18	273	129	53	691	292	366	11		0	63	16	0	96	3	2		66	21	14	3	119
20h	17	164	126	212	951	109	19	59	14	6	342	295	20h	4	57	41	17	115	4	41	20h	9	378	494	222	2
	163	1052	344	1058	539	680	403	258	9	149	5	365		56	9	50	55	88	55	2		38	61	555	710	533
	464	1341	582	1196	1035	1259	735	499	42	913	238	71		169	15	12	93	37	61	9		374	303	626	133	426
	1118	234	82	1433	96	770	888	504	405	86	957	81		58	179	96	33	167	53	109		302	424	976	1203	82
	871	167	63	869	49	1222	627	225	996	30	416	304		3	1	56	2	190	37	199		129	107	90	461	42
	766	1113	1206	1806	1044	322	457	43	324	824	903	98		2	0	1	51	29	0	27		12	11	781	201	326
	1242	1250	748	359	820	38	200	457	75	1662	127	61		14	1	90	9	3	0	14		17	26	486	74	263
	1401	225	384	18	61	8	28	410	75	478	4	669		166	53	143	0	48	70	0		372	266	350	553	45
	154	169	2	1161	164	101	351	131	2553	19	308	1552		123	206	34	25	119	78	9		853	171	60	55	34
	77	79	790	2678	25	1289	1392	394	380	15	170	82		2	94	62	17	126	76	35		13	13	241	17	200
	1200	62	741	1619	601	641	523	511	47	292	80	22		0	25	84	0	18	46	41		34	16	426	23	389
	384	818	272	1629	766	642	104	208	11	1120	172	789		102	19	85	21	129	0	94		305	9	275	750	37
	926	1638	448	1711	49	661	412	560	847	794	460	389		95	8	15	31	93	0	114		410	99	662	657	183
	22	1086	1101	98	137	63	509	149	314	17	10	13		53	0	5	1	110	0	23		139	759	1046	742	439
	219	279	1119	178	10	43	791	218	29	9	159	452		6	100	0	9	0	14	1		52	508	34	36	238
	69	667	375	1181	144	32	415	177	198	11	181	490		70	8	58	51	63	61	9		479	380	108	519	36
	159	259	682	1443	6	78	21	29	1609	355	1228	237		11	56	105	6	89	64	6		859	20	85	539	48
	943	1457	559	831	719	279	13	116	469	908	482	51		4	1	0	8	101	56	56		531	6	6	95	28
	408	499	64	129	762	11	42	51	122	473	611	412		68	0	0	0	55	47	21		1095	8	3	4	188
	1512	497	14	37	997	12	888	67	1434	79	25	2245		79	38	2	0	35	67	0		963	193	791	7	321
	503	5	78	17	768	106	841	442	2499	27	100	649		88	170	0	0	5	33	2		554	426	535	248	346
	21	134	23	771	58	473	702	148	1229	45	82	258		27	0	40	8	92	0	60		12	74	168	27	16
	242	64	11	451	9	845	57	1239	1146	1115	4	38		12	0	2	1	137	3	174		115	3	1	26	20
	243	116	189	15	25	20	2	172	133	762	73	21		6	0	89	0	9	3	43		242	16	13	51	62
	11	960	259	68	13	21	18	184	22	355	43	14		13	0	119	8	19	66	3		3	69	4	274	235
	6	295	44	293	77	22	42	192	82	18	373	221		2	0	29	14	101	89	113		47	142	77	10	287
	88	161	27	1552	48	112	195	223	118	4	194	192		53	0	37	76	61	43	57		5	2	67	140	45
	419	3	44	251	151	476	11	222	66	4	474	9		86	0	14	24	5	2	163		34	43	72	94	41
	1397	14	170	42	3	38	41	330	403	16	1000	17		32	0	35	45	45	2	47		147	13	2	340	17
	786	217	73	14	93	20	265	232	20	20	725	66		23	0	11	8	163	0	0		297	177	446	11	85
	446	249	40	24	240	20	4	51	93	48	992	335		7	26	0	5	128	8	4		12	295	171	93	74
	66	73	1364	1672	520	66	0	48	1495	352	89	332		0	1	0	1	105	21	43		15	72	40	1624	48
	9	108	936	1852	120	773	223	48	332	332	182	75		89	0	137	14	130	67	31		40	230	47	759	16
	446	169	393	1017	198	447	261	232	229	237	94	524		69	95	36	63	23	88	0		74	218	624	933	280
	1063	1695	1070	1222	232	1045	809	599	2527	824	185	295		0	0	129	74	101	152	109		253	316	231	464	195
	761	1021	385	1084	801	958	850	35	1588	311	1413	432		75	101	92	105	143	68	115		1276	291	1041	1060	21
	141	305	865	1269	461	878	805	199	1213	487	1625	1403		89	10	72	178	9	46	36		704	513	302	240	144
	10	114	684	990	344	553	60	836	1651	534	737	407		107	35	34	10	65	92	71		1581	249	1263	9	199
	40	126	81	1192	196	70	315	332	903	618	841	208		9	72	0	0	88	36	3		876	368	325	122	266
	118	1094	177	562	31	15	528	472	88	307	1326	258		3	1656	42	4	105	2	46		647	449	256	75	389
8h													8h								8h
18h*													18h*								18h*
20h													20h								20h
8h													8h								8h
