# Supplementary material for: Long-term consequences of the absence of leptin signaling in early life
Source: eLife. 2019 Jan 29;8:e40970. doi: 10.7554/eLife.40970 (PMC6384028; doi:10.7554/eLife.40970)
Supplement: Figure 2—source data 1. [file elife-40970-fig2-data1.xlsx]

## Sheet: Fig 2A
Body weight after reactivation (g)
Ubi	LepRNull	Ubi-LepRNull
27.8833	52.7833	27.4333
24.6	52.375	29.3167
24.3	50.45	31.8167
26.65	52.35	26.8333
25.1833	58.45	33.35
25.15	63.8333	28.5
23.5833	59.0333	39.2
25.6167	58.3833	31.2
27.2	66.5	37.7
27.2	55	25.8
27.35	72.2	30.2
28.9	66.7	29.4
28.7	65.7	29.8
31	56.9
29.7	59.2
25.5	57
28.6	55.5
28.8	55.6
30.3	58.9
27
29.4
30.2

## Sheet: Fig 2B
Body adiposity (g/100g of body weight)
S.C.				P.G.				R.P.
Ubi	LepRNull	Ubi-LepRNull		Ubi	LepRNull	Ubi-LepRNull		Ubi	LepRNull	Ubi-LepRNull
0.536038	2.54279	1.10783		0.985283	3.30763	1.97717		0.375472	0.981426	0.439586
0.616151	1.79694	0.846464		1.05189	2.8665	1.61507		0.320275	0.939031	0.412841
0.545539	2.7531	0.607988		0.8	2.99659	0.947035		0.199814	0.976404	0.208433
0.529804	2.8069	1.03374		0.817647	3.12408	2.73826		0.233137	0.816819	0.613116
0.546875	2.3692	0.599674		0.765039	1.47559	0.561726		0.171484	0.711449	0.239251
0.459431	2.33623	0.572595		0.695196	1.82299	1.23145		0.250178	0.631217	0.221157
0.422794	1.85061	2.00631		0.816544	2.08084	3.43145		0.138787	0.611661	1.064
0.497224	2.69401	0.659567		0.827535	1.41062	1.16092		0.297002	0.79569	0.362069
0.559398	2.42784	0.679003		0.964098	1.65102	1.50619		0.24812	0.647239	0.427573
0.557993	2.69977	0.60461		0.928253	1.37262	0.957624		0.295353	0.911624	0.168972
0.304301	2.94672			0.456989	1.12943			0.092688	0.951932
0.3424	2.42273			0.604	2.46568			0.1502	1.16124
0.380154	2.96156			0.703276	2.15936			0.165896	0.798153
0.436767	2.87512			0.749817	1.52467			0.278226	0.586079
0.280734	2.35146			0.66367	1.76057			0.14422	0.330721
0.69364	2.14569			1.07244	1.21685			0.402827	0.625075
0.659898	2.2097			1.08481	1.88993			0.352048	0.780106
0.289691	2.70808			0.751203	2.30472			0.142784	0.644879
0.479	2.99303			0.8938	2.56472			0.2426
0.463478				1.13026				0.228348
0.569492				1.24305				0.375254
0.555467				1.09974				0.313779
0.44707				0.691026				0.160256
0.561513				1.32829				0.320395
0.558943				1.18105				0.338024

## Sheet: Fig 2C
Serum leptin (ng/ml)
Ubi	LepRNull	Ubi-LepRNull
10.459	147.62	4.336
6.836	175.44	2.912
5.833	134.06	7.448
2.057	173.28	11.212
3.907	182.48	7.02
2.239	193.98	8.06
3.892	153.66	12.156
5.887	165.4	7.188
3.402	83.98	32.716
6.338	179.12
5.43	144.2
5.762	68.38
6.464	175.68
3.824	170
5.42	158.06
4.792	156.58
4.616	162.48
4.882	167.72
1.768	138.44
6.652
0.556
2.194
2.934
6.32
3.57

## Sheet: Fig 2D
Food intake (g/day)
Ubi	LepRNull	Ubi-LepRNull
4.175	6.15	4.375
3.56667	8.30667	4.22833
3.89	4.24667	4.36
4.48833	5.95833	4.05
4.21667	5.71667	3.5
3.695	5.63333	5.6
3.93833	6.28333	4.5
4.58333	5.81667	4.2
4.78833	5.33333	3.6
4.13333	6.6	4.5
3.4	5.4	4.6
3.81667	6.2	3.9
4.1	6.7	3.9
4.1	3.9
4.5	4.4
3.6	5.5
4.3	5
3.5	5.2
4.1	4.4
3.8	6
4
4.2

## Sheet: Fig 2E
Average VO2 consumption
Dark phase				Light phase				24h
Ubi	LepRNull	Ubi-LepRNull		Ubi	LepRNull	Ubi-LepRNull		Ubi	LepRNull	Ubi-LepRNull
3460.82	1670.5	2888.2		2813.42	1632.84	2487.01		3164.86	1665.67	2713.33
3278.32	1517.35	3216.48		2627.98	1301.77	2489.43		2947.53	1414.65	2888.32
3396.36	1696.5	2397.72		2759.02	1391	2146.42		3076.86	1550	2289.83
3556.73	1609	3412.18		2879.62	1385	2896.25		3202.46	1497	3156.77
3454.36	2708	3330.59		2882.39	2183	2747.15		3170.36	2406	3048.09
4112.82	2507	2902.24		3357.47	2107	2360.51		3793.75	2318	2616.82
3296.84	2007	3393.34		2707.86	1692	2783.53		2998.03	1845	3100.18
3580.42	2412	2860.43		2859.72	1783	2542.61		3205.49	2102	2678.1
3452.78	1981	3444.53		2786.73	1779	2829.62		3115.53	1887	3150.91
3020.26	1642			2508.32	1502			2764.27	1562
3740.45	2226			2998.56	1884			3363.8	2037
3345.73	1704			2689.27	1610			3025.38	1681
3287.68	1870			2623.31	1676			2941.46	1771
3449.45	1855			2798.59	1700			3128.55	1801
3520.28				2824.22				3171.89

## Sheet: Fig 2F
VO2 consumption
Time of day	Ubi															Time of day	LepRNull														Time of day	Ubi-LepRNull
18h	2161	2323	2503	2882	2597	3942	2516	3445	3582	2933	3625	3352	2759	3742	3607	18h	1434	1618	1975	969	1605	2535	2125	2441	1840	1798	1679	1610	1930	1634	18h	2966	2345	3050	2446	2341	2232	3185	2347	3668
	3608	2511	4071	3511	2618	4047	2557	2851	2655	2073	2676	2806	2595	3177	2342		1871	1590	1938	1061	2444	1688	1714	1939	2070	1852	2256	1507	1947	1610		2485	2201	1795	2445	2239	1968	2466	2297	2554
	3644	2174	2640	2688	3593	2992	2780	2418	2361	2200	2808	2442	2375	2569	2498		1904	1338	1437	1192	2020	1602	1760	1576	1790	1448	1994	1527	1901	2250		1988	2136	1913	2288	2681	2526	2719	2335	2804
	3310	1666	1634	2710	2526	3021	2451	2340	2275	2208	2641	2274	2373	2653	2442		1504	948	1211	1721	1865	1577	1474	1559	1700	1557	1860	1415	1573	1712		2073	3182	1727	3121	3922	3275	2408	2784	2850
	2343	2704	2042	2942	2488	3349	3103	2431	2536	2171	3427	2634	2416	2762	2502		1845	1791	1295	1381	2701	1851	2053	1736	1761	1465	1843	1601	1563	1801		2083	3005	2641	2136	3608	2071	2775	2401	2725
	2589	3317	2385	4145	2587	3103	2589	3031	3845	2534	3866	2534	2632	2668	3402		2234	1316	1389	1132	1789	2200	2363	2165	1654	1457	1810	1579	1624	1967		1844	2112	1917	2464	2372	2107	2623	2337	3775
20h	3725	2463	2569	3786	3415	2823	2265	3603	3193	3069	2782	3057	3551	2569	2698	20h	2035	1648	1441	1894	2245	2731	1864	2300	2525	1666	2527	1757	1697	2347	20h	2705	2267	1865	3700	2202	2089	3775	2444	3708
	2678	2771	4424	3340	2476	2981	4368	2881	2656	3042	2976	3285	3230	3503	2642		1639	1338	1594	1694	2604	1665	1493	1729	1963	1777	2157	1440	1986	1647		2296	2571	3000	3194	2699	2683	3626	3173	2647
	3925	3339	3752	3334	2618	4951	2751	4283	3239	2297	4604	3148	3584	4134	3573		1951	2029	1488	1167	2255	1649	1709	1731	1967	1529	2240	1655	1632	2238		2688	3550	3067	3418	2336	2492	2897	3080	3260
	4113	3818	3077	3364	2696	3570	2486	3673	4089	2370	4240	3692	2494	3598	3734		2105	2092	1918	1885	2672	1840	2465	2436	2288	1876	2010	1860	1768	2396		3339	3364	2325	2451	2715	2007	4175	2405	2703
	4299	3109	3283	3893	4181	4793	2570	3469	4011	3297	4605	3389	3216	2760	3963		2356	1425	1796	1482	2437	1653	1749	2505	2326	1810	2372	2142	2010	2423		3250	2801	2606	3140	3370	2142	3708	3126	4352
	3579	2366	3843	4067	3432	3732	2498	3111	3601	3292	4434	2742	3476	3196	2992		1829	1356	1575	2133	2373	2839	1550	2356	1996	1831	2179	1723	2081	1651		3444	3635	3148	3487	3743	2197	3572	2939	4123
	3528	3476	4074	4279	2524	3661	2323	3678	2492	2678	4052	2576	2872	3893	2979		1870	1684	2103	2070	2444	2628	1508	2085	1860	1400	2555	1529	2179	1730		2598	3695	2790	3155	2774	3497	2640	2805	3241
	3372	3974	2651	3843	3182	4038	3380	3327	3676	2304	2739	3777	3468	3752	4046		1870	1773	1646	2116	2683	2998	1996	2703	2375	1662	2254	1629	2173	2322		3195	3589	2645	2952	3041	3132	2621	2843	2823
	4151	3196	2848	3819	4236	3078	2718	3154	2620	3123	3106	3943	3417	3214	3948		1584	2034	2100	1708	2396	1920	2245	2428	1934	1513	1902	1600	1585	2388		3211	2660	1967	3606	2948	2436	3735	2936	2632
	3557	3143	4162	3674	4046	4034	2941	3304	3313	3190	3197	3610	3616	3800	3804		1505	1460	1933	1394	3106	2087	1900	2785	1750	1443	2274	1812	1759	1583		3392	2817	2308	3737	2808	3193	3401	2649	3909
	3047	2427	4320	3493	3154	3543	3493	4376	2890	2962	4150	2566	3222	3007	4126		1453	1365	1963	1336	2784	3027	1588	2824	2092	1754	2439	1856	1751	1868		2526	2769	2977	3605	3668	2244	3010	2636	3894
	3668	2656	4228	3910	3093	4486	2948	4371	3571	2950	3527	3409	3227	3738	4032		1400	1234	1723	1350	2737	2672	2228	2712	2026	1456	2210	1861	1755	2233		2294	3398	3077	2783	3678	2421	3007	2715	3860
	4220	2992	2894	3801	3896	3840	4006	3892	3095	3011	2998	3823	3822	3115	2797		2413	1197	1713	1319	2567	2910	2044	2257	1908	1872	2283	1733	1972	2143		2694	3344	1999	3387	3114	3203	3663	3573	2868
	3332	2365	2993	4078	3709	3288	3430	3601	3381	2475	3182	3810	3781	3645	2797		1597	1841	1821	1935	2663	2223	2036	2774	1833	1407	1979	1468	2159	2443		3238	3588	1908	4044	3268	3122	3654	2784	2773
	3009	3805	4090	4139	2838	3919	4382	3285	3948	3554	4341	3921	2841	3564	3351		1426	2001	1608	1907	2574	2407	2292	2828	1773	1650	2402	1603	1673	1651		2626	3366	1668	3758	3297	2293	3609	2841	2928
	2884	3992	3762	3074	2961	4625	4071	3316	3346	3258	4475	3564	3550	3980	4018		1318	1352	1479	2048	2266	3116	2300	2278	2212	1416	1968	1652	1721	1629		3391	3735	2684	3860	3134	2294	2856	2603	4229
	3693	3833	2717	2937	2910	3635	3585	3968	2644	3019	4488	2998	2849	3923	3948		1303	1317	1459	1937	3050	2943	2113	2467	1752	1360	2444	1694	1676	2095		3243	3774	2828	3255	4001	2931	3149	3317	4299
	2987	4038	2593	3489	3729	4931	2583	4602	3868	2701	3860	2687	3938	3872	4084		1396	1287	1362	1679	2609	3001	1162	2580	2340	1454	1905	1529	1659	2449		3389	3789	3021	2811	4031	3445	3453	3198	4299
	4062	2964	2725	3519	2862	4699	4136	4234	4228	3139	3031	2847	4031	3738	4174		1951	1536	1373	1581	2638	2706	1708	2536	1828	1469	2019	1498	2026	2108		2404	3779	2861	3814	3015	2349	3711	3363	4218
	4320	2377	2613	4175	4072	4730	2968	3188	4025	2986	3979	3719	3832	3226	3824		1857	1313	1568	1294	2526	2178	2142	2319	1821	1525	1923	1750	2111	1851		2873	3093	2020	3842	3502	2653	2784	2801	4056
	3730	3444	2732	3419	4666	4804	3075	3074	2257	3014	4269	3437	3681	3436	3908		1556	1353	2241	1812	2982	2064	2340	2119	1826	1442	1832	1903	1903	2463		2766	3654	1867	3940	3323	2272	2694	3751	3257
	2668	3782	3170	3746	4413	4732	2754	2486	3177	3239	3160	3323	3026	3395	3491		1333	1180	1515	1910	2436	2367	1338	2113	1486	1493	1855	1397	1985	2115		2950	3843	1670	2826	2895	2105	3757	2686	2585
	3374	2399	2753	3573	3864	4368	2978	4368	2799	3195	3184	2692	2883	3867	3678		1253	1211	2098	1509	2045	1862	1688	1861	1371	1526	1740	1486	1665	2349		3303	3721	1602	2828	3780	3193	3336	2971	2752
	3570	2459	2723	3159	2557	4578	3014	4323	3283	3290	3759	3440	3683	3608	2699		1831	1420	2075	1429	2240	2224	1817	2401	2235	1386	1854	1525	1992	1597		3356	2966	1856	2903	4050	3182	2623	2951	3027
	3313	3204	2571	3692	3346	4415	3651	4178	3882	2499	4427	3936	2917	3388	2676		1184	1518	1801	1364	2242	2652	2061	2647	1894	1892	1704	1782	1724	1742		2399	2846	2800	2841	3002	2057	3119	2691	2619
	3404	3963	3498	3228	2487	2900	3891	2784	3752	3184	4227	2951	3373	3226	3533		1402	1227	1542	1944	2789	3143	2362	2569	1755	2035	1588	1696	1532	2445		2273	2957	2797	3678	2739	2514	2775	2538	2759
	3002	3227	3878	3464	2620	3679	2726	2606	2531	3529	4705	3053	2951	3835	3068		1402	1183	1449	1774	2097	2049	1738	2263	1806	1580	1998	1788	2199	2206		3172	2690	2992	2743	3267	3605	4256	2737	2870
	3136	2692	3872	3210	3522	3549	3408	2932	2745	3399	4257	2823	3016	3271	3429		2300	1441	2094	1721	2767	2099	1594	2013	1650	1477	2050	1630	1979	1579		2426	2448	2637	3935	2777	3581	3676	2784	3232
	3581	2736	2728	3175	3486	3961	3045	2395	3628	2917	3453	3820	2884	3439	3818		1603	1266	1814	1669	3103	1970	2520	2533	2023	1489	2636	1621	2045	1673		3279	3198	1898	3551	3720	3280	2886	2503	3838
	3114	2561	2669	3436	3282	2920	3340	2413	2623	3365	4186	3881	3104	3491	4157		1820	1393	1889	1603	2992	2504	2072	2776	2100	1478	2233	1721	1753	1733		2904	3090	1837	3015	3305	2210	4104	2413	3823
	4014	2703	2614	3735	2890	3013	2928	4230	3589	3284	3690	3794	3869	3397	3986		1515	1766	2165	1520	3068	2310	1908	2685	1900	1962	2116	1809	2171	2104		2357	2635	1852	3011	2872	2170	3615	2159	3153
	3924	3847	3114	3514	3173	3458	3381	3784	3576	3324	4235	3661	3799	3418	2720		1591	1327	1866	1935	3136	2493	1530	2671	1928	1462	1937	1557	2085	2161		3239	3143	2309	3790	3326	3030	3239	2480	3153
	3294	3081	2715	3700	2798	3889	3576	2570	3944	3144	4691	3571	3220	3513	2893		1335	1312	1959	2273	2502	2821	2075	2188	1924	1728	1807	1876	1811	2257		2757	3665	1927	3650	2769	3492	4099	2642	3149
	3176	2744	3892	3126	3455	4223	4233	3629	3114	3338	4062	4054	3637	3622	3932		2130	1571	1719	1484	3226	2518	2226	2227	2211	2081	1721	1695	1503	2534		3172	3644	2409	3189	4032	2124	3217	2994	4429
	4150	3731	4008	3348	3909	3068	3577	3038	3762	3547	2984	3825	3801	3166	3678		1898	1830	1599	1492	2147	2399	2527	2440	2282	1383	2071	1859	1599	1755		2977	3801	2272	3438	4141	3109	4197	2530	4192
	3948	3806	3826	3646	3096	4369	3042	3801	4047	2862	4445	3594	4069	2867	3275		2022	1466	1792	1812	1852	2255	2600	2575	1972	1509	2163	2096	1831	1578		3641	3595	2898	3553	2844	3216	3923	3338	4122
	2828	3997	3921	3767	3723	4379	2934	2755	3633	3554	4897	3982	3857	3587	3691		2005	1920	2083	1837	2413	2902	2377	1856	2056	1453	2746	1822	2143	1663		3542	3563	2543	3911	2604	3699	4281	3425	4359
	3853	3865	2533	3471	3689	3898	3796	3539	2735	3218	4580	3769	4044	3800	4278		2371	1589	2187	2060	2271	2971	1331	1697	2019	1359	2144	1986	1990	2332		3450	3551	2127	3616	4068	3490	4057	2763	4284
	4186	3609	2478	3524	3936	2600	3099	3856	4291	3454	4636	3843	2765	3322	3854		1585	1876	2014	2095	1760	2902	1963	2299	2140	1311	1888	1697	2040	2191		3268	3634	2870	4101	4243	3381	3939	2618	3930
	4025	3631	2557	3286	3225	4311	2918	4011	4037	2421	4312	2422	2565	3502	3593		1432	1847	1791	1631	1643	2531	1710	2559	2410	1616	1776	1263	1384	1764		3036	3846	2774	3851	4201	3316	3762	3091	3947
8h	3702	2842	3839	3527	4391	4430	2873	3991	3630	3274	3789	3637	2902	3368	3541	8h	1893	1329	1458	1306	2173	2208	1530	1871	1835	1444	1858	1302	1461	1449	8h	2621	3630	3030	2759	2764	2158	2968	2739	2637
	2443	2274	4059	3786	4364	4086	3880	3344	2458	3116	2739	3649	3568	2930	3528		1795	1296	1346	1850	2569	2961	1536	1742	1928	1303	1871	1371	1468	1784		2079	3126	2125	2630	2342	1832	2570	3318	2672
	3227	2648	3812	3090	4228	3969	3242	2656	2493	3394	2781	2857	3564	2906	2893		2134	1174	1337	1865	1633	2978	1494	1662	1706	1341	1670	1541	1762	1572		2912	2244	1880	2717	3201	2964	2632	2266	2423
	2384	3331	3556	2989	3086	3108	2460	3672	3427	2814	2876	3571	3237	3073	2956		1566	1394	1312	1756	1689	2112	1286	1479	1667	1372	1727	1997	1379	1566		2128	2197	2907	3447	2554	1822	2743	2455	3636
	2283	3467	2691	2760	2931	2642	2160	3074	3041	2430	2976	2706	2790	3032	4212		1326	1078	1863	1345	1875	1886	1770	1408	1795	1374	1884	1539	1389	1931		2375	2368	2391	2405	2453	1913	2595	2354	2476
	2970	3082	2414	3604	3086	2936	2169	2539	4326	2624	2923	2737	2704	2999	3644		1444	1576	1301	1235	1746	2008	1397	1905	1760	1700	1791	1533	1380	2082		3347	2566	2187	2768	2624	2093	2879	3054	2474
	4176	2300	2645	2639	2705	4291	2505	2695	2991	2627	4260	2719	2557	3552	3086		1286	1729	1485	1303	1816	1661	1638	1282	1818	1333	1720	1546	1576	1662		2268	2443	2672	3889	3628	2791	3307	2712	2646
	2809	2440	2559	2413	2739	2626	3413	2632	2350	2317	2427	2519	2461	2607	2716		1998	1369	1747	1160	1982	2414	1352	1297	1554	1283	1746	1584	2111	2234		2297	2038	2769	3173	2643	2309	3668	2500	3498
	2561	2540	2931	2470	2534	2985	2683	3148	2627	1921	2784	2426	4057	2810	2484		2186	1117	1387	1283	2260	1741	1425	1175	1783	1266	2061	1468	1897	1764		2253	3710	2090	2886	2459	3194	3499	2062	2939
	2718	3463	3551	2743	2603	2395	2220	3717	2480	3010	3854	2743	2160	2561	2746		1500	1097	1358	1128	2526	1693	2540	1149	1953	1817	1690	1942	1544	1501		3290	3128	1918	2644	2678	2695	3084	2470	2713
	3019	3564	2722	2621	2480	2716	2250	3714	4310	2279	2602	2558	2745	2427	2735		1340	1089	1343	1360	1919	2305	2383	1008	1786	1628	1504	1845	1559	1709		2953	2220	1852	2582	2931	1993	2792	2076	2656
	2503	2623	2595	2936	4032	3281	2354	2715	2145	2594	2964	2783	3188	2652	3561		1910	1020	1505	1844	2101	1666	2321	1070	1652	1388	1486	1345	2015	2107		3034	2178	2544	2631	2657	2337	2734	2439	4420
	2726	2384	2627	2367	3435	4401	4009	2454	2822	2216	2954	2583	3179	4282	3842		1897	991	1227	1969	2526	3031	2131	2355	1684	1319	1369	1415	1498	2088		1938	2255	1994	2859	3155	3286	2647	2331	3775
	3771	2375	2373	2403	2506	3458	2771	2752	2894	2769	2570	2447	2499	3625	3520		2257	1110	1079	1382	1834	2740	1623	2511	1553	1365	1913	1603	1446	1664		2241	2178	1860	2763	2396	2595	2481	2693	2982
	3848	2452	3396	2786	2653	3269	2718	2558	3478	2488	3550	2508	2606	3423	3311		1516	1974	1258	1297	2550	1866	1548	2338	1542	1315	2196	1740	1573	1567		2600	2536	1806	3052	2714	2104	2763	2287	2830
	3297	2422	2455	2805	2754	4306	2399	3692	2394	2002	2633	2379	2849	2544	2556		1368	1849	1306	1629	1829	2526	2040	1698	1792	1649	2471	1876	1783	1771		2445	2383	2721	3356	2445	2751	2602	2604	2599
	2407	3379	2463	2643	2879	2951	2655	2425	2598	2342	2592	2495	2469	2846	2739		1313	1159	1434	1155	2053	1613	2195	1574	1373	1540	1652	1775	1501	1680		2159	3538	1827	2636	2406	1967	3807	3008	2713
	2427	3178	2525	2510	2304	2722	2342	2511	2256	2339	3929	2404	2268	2487	2423		1389	1071	1300	1068	2790	1684	1619	1480	1493	1334	1539	1376	1593	2024		2064	3017	1792	2860	2349	2358	2060	2485	2459
	2259	2611	3825	3029	2361	4399	2373	2849	2437	2499	2470	2300	2657	2305	2778		1883	1045	1636	1555	1918	2480	1466	1261	1888	1343	1454	1366	1570	1923		2780	2265	2875	2700	2660	2056	2752	2208	2785
	2467	2619	3764	2366	3486	3733	2657	3042	2910	2512	3892	2776	2384	3101	2492		1848	1289	1875	1078	1795	2779	1435	1441	1705	1762	1464	1677	1634	1945		2577	2184	2494	2855	3816	2861	2225	2324	2911
	2526	2146	3679	2713	3338	2853	2389	2542	2371	2143	2754	2468	2408	2489	3774		2416	1400	2097	1681	1786	2196	1418	2250	1581	2017	1708	1537	1482	1638		2349	2411	1881	3315	2604	2200	2895	3162	2526
	3527	2391	2490	2643	2408	2886	3151	2373	2158	2198	2507	2406	2281	2369	3431		1527	1136	1335	1663	1912	1914	1932	2214	1778	1888	1517	1793	2103	1483		1881	2193	2065	2438	2540	2302	2948	2024	2628
	2578	2475	2754	2624	3578	2526	2611	3971	2775	2194	2641	2525	2119	2416	2546		1464	1179	1257	1945	2124	1867	1960	1626	1607	1343	1476	1535	2129	1621		2912	2269	1904	2585	2412	2116	2435	2379	2364
	2376	2783	2563	2192	2702	2613	3154	3240	2268	3003	2614	2382	2594	2438	2364		1250	1247	1254	1328	2202	1695	1696	1707	1629	1337	1482	1468	1568	1817		2716	2682	2479	3269	2426	2272	2726	2594	2724
	2331	2654	2484	2665	2360	2982	2345	2570	2265	2313	2418	2244	2278	2271	2490		1935	1112	1812	1681	1957	2368	1596	1959	1616	1342	2038	1971	1600	2360		2262	2425	2634	2756	3469	2284	2697	2416	2314
	2785	2469	2147	2748	3496	2956	2610	2348	3278	2457	2637	2447	2352	3004	2342		1900	1228	1423	1305	1883	2161	1393	1448	1457	1882	2182	1581	1822	1748		2268	2558	1894	2668	2293	2532	3502	2338	2492
	2373	2396	2809	3463	2268	2588	1990	2412	2227	2229	2621	2268	3302	2511	2357		1875	1624	1311	1187	2498	2051	1627	1874	1635	1796	1960	1482	1561	1636		2845	2476	1988	2696	2749	2818	3413	1994	2427
	2586	2548	2994	3570	2498	2790	2464	2388	2353	2379	3703	2218	3208	2523	2470		1910	1626	1270	1173	1862	1703	1298	1857	1916	1508	1782	1477	1507	1715		3097	2375	1840	3071	2559	1979	2773	2268	2376
	3826	2441	2561	2376	3502	3473	2979	3269	2393	2771	2568	3077	2491	2397	2487		1688	1272	1273	1607	2042	2180	1572	2213	1783	1379	2046	1461	1607	2027		2832	3671	2043	2582	3270	2191	2683	2135	3645
	2425	2312	2461	2549	2192	4478	3144	2474	2326	3275	2768	3350	2375	4005	3963		1657	1176	1652	1145	2175	1854	2148	1695	2070	1503	1738	1953	1826	2202		2108	3282	1770	2929	3461	2139	2710	2841	3578
	2695	3082	3236	2517	2642	3943	2607	2619	2601	3354	2702	3183	2308	3107	3487		1450	1272	1177	1114	2018	1519	1641	1535	1867	1988	1593	1664	2111	1723		2217	3029	2008	3245	2516	2227	2636	3148	3443
	2499	3384	3501	3390	3486	2821	2333	2484	2448	2882	2760	2854	2213	2641	3149		1402	1296	1197	1733	2098	2219	1477	1581	1776	1430	1669	1574	1789	1539		2586	2571	2793	3410	2710	2362	2535	2602	2779
	2449	3081	2653	3325	2282	2734	2261	2495	3705	3492	4166	2506	2247	2537	2557		1294	1765	1961	1655	2381	2361	1661	1657	1781	2164	2350	1832	1576	1642		2781	2177	2868	2661	2410	2224	3463	3149	2426
	3724	2403	2660	2661	2624	2601	2289	3264	2161	2551	3226	3254	2462	3485	2512		1398	1601	1849	1323	2636	2169	1968	1594	1640	1732	2676	1895	1512	1641		3057	2502	2300	2852	2530	2149	3132	2697	2590
	3993	2246	2591	2449	2867	2773	3015	2573	2448	2215	2256	3292	2547	2400	2348		1729	1659	2039	1210	3021	1829	2040	1621	1673	1542	2114	1478	1891	1748		2225	2171	1809	3386	2735	1869	2320	2294	2585
	3545	2268	3519	3014	2676	4137	3569	3752	3657	2205	2905	2578	2345	2406	3506		1952	1188	1619	1259	2902	1823	1600	1861	1742	1496	2318	1931	1514	1580		2554	2191	1905	3419	2697	3735	2534	2334	3864
	2474	2574	2653	2800	2118	2604	2817	2458	3043	2151	2961	2367	2718	2448	2686		1833	1291	1290	1144	2048	2510	1578	2126	2349	1436	1956	1813	1641	2396		2176	2209	2372	2747	2519	2603	2701	2403	3750
	2467	2782	2374	3896	4373	3024	2767	2641	2452	2914	4045	2547	2548	2993	2509		1514	1374	1529	1136	1913	1697	1361	2395	2451	1462	1812	1391	1945	1702		1966	3061	2448	2544	3591	2865	3881	3467	2639
	2618	3319	2702	3010	4003	2887	2499	3144	2564	3010	2859	3723	2404	2726	2570		1695	1679	1246	1224	2064	1440	1487	1942	2004	1594	1859	1632	2202	1600		2607	2834	2104	3005	2416	3028	3303	2518	2480
	3689	2573	2389	2717	2329	4629	2491	2760	2752	2340	2950	2608	2798	3210	3721		1819	1528	1626	1846	2202	1987	1971	2174	1971	1623	2180	1708	1631	1846		2320	2407	2145	3699	2755	1886	2845	2732	2738
20h	2656	2428	3642	2886	2300	2915	3626	2915	3694	2337	2923	2665	2479	2626	3849	20h	2106	1365	1303	1753	3098	2517	1780	2247	1891	1586	2542	1928	1663	2342	20h	2878	2501	2695	3925	2789	2125	2821	3090	2508
	4020	3146	4115	3974	3392	4102	3475	4288	2520	2436	4057	2543	3007	3501	2626		2236	1691	1780	1437	2369	2510	1626	2037	2283	1856	2021	1977	1685	1739		2496	2377	2875	3597	2387	2007	4291	2331	3645
	3027	3623	2996	3750	2597	4541	2527	3638	3213	2933	3630	3514	3587	3849	3540		2161	1885	1900	1583	2937	1918	1566	1845	2339	1509	2362	1809	1632	1711		3568	3369	3410	2866	2446	2527	3803	3471	4376
	4111	3935	4101	3854	2797	4903	3193	4078	4166	2870	2799	2841	3043	3648	2782		2123	1760	2273	1445	3199	1997	1515	2685	2411	2118	2260	1618	2112	1791		3155	3535	3220	3450	3697	1899	3021	3125	4338
	4178	3678	3827	4191	3622	3999	2802	3179	3982	4092	4262	2591	2389	3490	4102		1711	2100	1990	1352	2511	1726	1771	2763	2244	1949	2493	1767	1779	2437		3266	2691	2230	3315	3793	1872	4173	2437	4176
	4107	2452	2963	4102	4064	4584	2881	3198	2792	2931	4280	3592	2662	3654	4080		1918	1510	2340	1826	2540	1801	2178	2529	2359	1521	2875	2112	2065	1705		2882	3378	3102	3389	3265	2700	3492	2586	3208
	2855	3119	4142	3639	4226	4627	3883	3875	2857	2590	3889	3343	3340	2921	3954		1953	1343	1464	2152	2851	2023	2097	3012	1989	1511	1974	1860	1830	1518		2452	3347	3277	3677	3273	3075	2725	3512	2445
	3831	4183	3247	3923	3908	3297	3128	3578	4014	3298	3675	2492	2544	3569	2643		1664	1409	1852	1299	2617	2464	2524	3069	1928	1642	2462	1561	1696	1767		3133	2922	2450	3920	3616	2320	3416	2763	2589
	3841	3649	3996	3846	3146	3473	2775	3469	3296	2735	3852	2504	3121	3768	4220		1649	1842	1893	1776	2461	2720	1515	2625	2193	1600	2286	1721	1859	2464		3140	3690	2003	2902	3097	2546	3399	2658	4144
	3182	3628	4108	3539	3810	3903	3762	3688	2629	2855	2681	3811	3358	3392	4190		1647	1691	1769	1923	2604	2329	1607	2713	2170	1690	2117	1838	2168	2105		2657	3223	1905	3333	3318	2973	2911	2610	4279
	3604	2605	3642	4332	2772	4450	4203	2948	3195	2858	3803	3811	2379	2836	3076		1519	1418	1324	1518	3033	2956	2466	2770	2329	1547	1961	1664	2122	1861		3334	3643	2614	3420	3892	2746	3946	2517	4063
	3864	2785	3246	3962	3990	4663	3719	4404	2673	3293	4213	3579	2641	2829	2819		2358	1523	2304	1643	2345	3142	2212	2779	1595	1518	2545	1650	1981	2228		3269	3187	3234	3416	4260	2272	3798	3250	2951
	4072	2792	2762	3895	4085	4701	4214	4518	4039	2812	3837	2740	3264	3472	3314		1504	1710	1854	2035	2480	2685	2312	2811	1959	2066	2302	1834	2000	2413		2438	3731	2885	3749	4003	3181	2972	2708	2967
	2784	3829	3983	3409	4238	3560	3109	4022	4367	2894	3716	2363	2814	3177	4161		1422	2015	1375	1674	2833	2543	2365	2124	2013	1684	2657	1689	1589	1755		3276	3220	2158	3213	3975	2867	3173	3836	4000
	3850	4073	4132	3846	4350	4249	4447	3305	4027	3595	3982	3854	3762	3123	3908		1356	1488	1550	1387	2778	2420	2296	1971	1820	1781	2267	1950	1659	1565		2888	3795	1850	3219	2866	3283	4020	3672	4163
	3230	2825	3886	3661	4238	4783	2815	3742	3900	3552	3650	2727	3924	2708	3948		1619	1340	1449	2002	2597	2743	1857	2288	1793	1468	2049	1666	1596	1579		3532	3525	2923	3199	2796	3087	3909	3245	4375
	3832	3542	2875	3153	2791	4517	2813	3335	2574	3493	4456	2866	3087	3466	3012		1349	1288	1448	1970	2604	2380	1998	2371	2249	1478	1885	2045	2080	1740		2524	3898	3038	3789	3869	2118	3741	2941	4350
	4421	4075	2766	3198	2422	5210	4013	3403	2990	2418	4431	3835	2514	4377	2948		1254	1253	1372	1931	3173	3034	2368	2928	1963	1542	1773	2011	2112	2008		3291	3757	3051	3764	3586	2983	2891	2373	4245
	3009	3961	3747	3072	3381	5069	3471	4585	3964	3247	4495	3876	3319	4063	4072		2108	1806	1757	1565	2778	3134	1999	2184	1916	1464	1790	1725	2262	1699		2996	3763	2365	4221	4164	2426	3468	2341	4280
	3091	3563	4183	4046	3628	4858	3301	4331	4239	3652	4140	3048	3562	3679	3521		1917	1424	2183	1369	2567	2169	2247	1929	1839	1415	1757	1509	2037	1590		2560	3663	2027	3961	3763	2108	3672	2910	3744
	3573	2779	3933	3464	2908	5144	3287	4331	4107	3605	3012	2360	3458	3701	2562		1857	1257	1348	1768	2509	2184	2067	1979	2365	1529	1549	1498	2009	1665		3090	3001	1910	3756	3615	2330	2922	2780	2912
	3778	2317	3388	3936	2884	4580	3346	2689	3577	2804	3674	2228	3708	3542	3579		2387	1172	1175	2133	1832	2261	1941	2657	1854	1334	1832	1881	2154	1992		3048	3522	2011	2691	2953	2730	3544	3473	3537
	4111	3801	2349	3030	4033	4585	3904	3404	2836	2749	3188	2555	2739	3376	4216		2330	1335	1290	1725	2895	2082	1049	2833	1874	1443	2405	1657	1845	2015		2984	3817	2894	2577	3336	2998	3000	2206	4023
	4113	3736	2562	3715	4442	4911	2770	3899	3636	3352	4271	3540	2413	3333	4008		1961	1513	1314	1733	2148	2549	1851	2826	2067	1637	2767	1663	1424	1969		2770	3472	2171	3629	3596	3089	3512	2559	3190
	3816	3024	2530	3554	4059	4811	3415	4095	3858	3346	4224	3234	2528	3284	3866		1405	1294	1320	1516	2068	3061	2159	2083	2022	1460	2222	1674	1359	2556		2566	2661	1970	2638	3308	3366	2802	2158	3428
	3499	3023	2633	3696	2614	4619	3052	2766	2849	3086	4064	2546	2737	2884	3659		1299	1222	1239	1431	1895	2474	2468	1846	1734	1511	2199	1800	1489	1663		3283	2926	1944	3070	3964	2951	2882	2649	2936
	2886	2787	2832	3269	3252	4387	3001	2592	2660	2826	2897	2372	2703	3064	2437		1195	1448	1865	1347	2428	2196	1730	1750	1729	2209	2016	1564	1551	1642		2721	2975	2044	3299	2778	2766	3239	2344	3040
	3391	3623	2390	2955	2611	3964	3567	3192	3610	3026	3191	2393	3225	3849	2901		1352	1536	1775	1218	2793	1930	1901	2340	2006	2021	1893	1696	1438	1495		2933	3405	2763	2942	2559	2085	3039	2291	2775
	3075	2706	2519	2719	3444	3489	3404	4026	2561	2971	2879	3799	2489	3544	2768		1198	1537	1812	1211	2583	2280	2093	2793	1815	2289	1771	1679	1863	2089		2795	3373	3107	3802	3229	1889	2586	2796	4028
	3402	3606	3289	3425	3240	4301	4201	4076	2286	2650	4117	3632	3592	3790	3595		1233	1401	1495	1102	2482	2524	2515	2807	1867	1537	2091	1653	1954	1998		2743	3030	2194	2947	3130	2616	4154	2304	3204
	3256	2704	2616	2928	3383	3961	2893	2837	3393	3645	3484	3526	2730	3292	3206		2093	1236	1392	1514	2882	2294	2249	2724	2344	1699	1877	1703	2120	2329		3486	3527	1692	3788	3973	2313	3310	2597	3618
	3942	2723	3928	3139	2832	4530	4003	2720	2857	2938	3276	2153	3142	3678	3637		1408	1393	1490	1583	2861	2499	2316	2311	2507	1417	1674	1703	1970	1625		3262	3135	1760	3455	3731	3592	3033	2808	4217
	3261	3740	2685	3325	3813	4523	3019	2529	3791	2957	3502	3343	3210	3936	3657		2320	1457	1859	1430	2515	2569	1837	1960	2026	1413	2129	1709	1947	1606		3239	3773	1991	3102	3809	3082	3927	3296	3557
	3503	3875	3100	2690	3908	3934	3510	4509	3895	2850	3563	2913	2416	3510	2977		2002	1395	1710	1976	2898	2697	1751	2007	1957	1447	2120	1828	1635	1918		3201	3261	2236	3720	2789	2853	3902	2515	2976
	3931	2459	3699	3768	3993	3951	3648	3008	3444	2633	3914	3865	2855	3799	2971		1422	1792	1562	1778	2208	2843	1716	1792	2335	1467	2120	1826	1551	2140		3245	3787	1871	3582	3633	3346	4196	3015	4453
	3101	3892	2733	3542	3846	4883	3669	2702	3619	3516	3796	3677	3411	3734	4044		1908	1833	2074	1641	2220	2902	2297	2360	2253	1666	2381	1923	2361	2531		3012	3662	3154	3668	3471	3348	3365	3113	4369
	3986	3838	3619	3431	2973	5032	3114	3858	2809	3359	4022	3747	2854	2622	3379		1822	1894	2290	1866	1909	3088	2511	2496	1941	1704	2286	1807	1858	1928		2306	3714	2906	3768	2901	3404	2903	2194	4374
	3585	3334	3802	3894	3046	4733	2830	3228	4320	2553	3902	2715	3656	3636	3728		2022	1419	1982	2135	2029	3094	2536	2471	1851	1108	2702	1702	1946	1432		3237	3702	2853	3197	3525	3700	3912	3149	4529
	2933	2518	3720	3657	4249	4480	2759	2931	4178	3017	2804	3307	2864	3767	3125		2143	1517	1941	1549	2416	3197	1804	2326	2059	1328	2172	1516	2052	1829		3427	3625	2279	3520	4147	3462	4258	2761	4105
	3696	2583	2613	3966	4324	4407	2791	2598	4157	2597	2873	3027	2361	3540	2872		2073	1566	2023	1788	2242	2892	1602	1638	1876	1293	1948	1453	1487	2150		3369	2620	1971	3239	3233	3429	4105	3076	3618
8h	3683	2212	2490	3198	4082	3011	3743	4073	4238	2903	3278	2604	3465	2846	3524	8h	2088	1637	1520	1413	2770	2866	1670	1644	1928	1206	1847	1662	1505	2316	8h	3195	2538	2532	2484	2353	3163	3736	3247	2696
	2338	2549	2400	3856	3228	3410	3038	4165	2386	3211	3340	2787	2421	2734	3402		1941	1383	1424	1263	1949	2249	1704	1786	2178	1270	1664	1596	2005	1557		2076	2559	2968	3419	3511	2065	2752	3359	2532
	3023	1996	2759	2904	2575	4552	2671	2936	2596	3042	3092	3713	2392	2617	2382		1486	1203	1325	1546	1804	1905	1743	1511	2475	1263	1460	1384	1389	1510		1839	2633	2730	2984	2467	1845	2499	3213	2408
	2629	2077	2626	2270	3562	3326	2981	2564	2565	3215	2832	3676	3718	2414	2520		1435	1214	1307	1517	1813	2103	1482	1332	1891	1273	1402	1411	1408	1637		2656	3362	1728	3251	3022	2277	2686	2193	3825
	3828	4169	2261	2657	2326	2962	3420	2958	2728	2318	4460	3226	3895	4283	4057		1568	1133	1333	1377	2087	2022	1352	1318	2174	1418	1692	1722	1402	1991		1713	2316	1582	3228	3036	2851	2446	2361	4206
	2733	3393	3137	3599	2924	2984	2453	2938	2739	2151	2737	2480	3312	2564	3324		1672	1517	1318	1094	1852	1818	1215	1791	1966	1325	1398	1790	1429	2051		2369	2160	2568	2589	2574	2373	3663	2196	3862
	3051	2974	3745	2725	3614	3618	2360	2914	3143	2386	2810	2230	2074	2547	3364		1836	1216	1208	1097	1830	2132	1457	2057	1551	1320	1332	1439	1561	1473		2064	2348	2840	3261	2585	2500	3062	2342	2484
	2461	2120	2287	2762	2484	3161	2394	3864	2579	2059	3778	2651	2192	3686	3301		1886	1019	1249	1590	2014	1936	1114	1528	1589	1259	1210	1404	2138	1388		2069	2523	2815	3187	2776	2154	2403	1950	2659
	3212	2181	2579	3861	3123	2826	2983	2580	2756	3543	3180	2537	2325	2471	2375		1735	939	1564	1557	1666	2203	1008	1315	2107	1612	1151	1656	1673	1493		3717	2198	1780	3461	2897	2115	2476	2499	2559
	3324	2304	2306	2905	2471	4158	4038	2567	2961	2297	2836	2633	2024	3465	2527		1351	962	1180	1668	1838	1825	2281	1461	1413	1340	1650	1641	1326	1579		2217	2507	1424	3020	3365	2181	3249	2310	2702
	2991	2014	2450	2510	2639	4798	2833	2671	2497	2108	2418	3535	2446	2503	2311		1279	983	1184	1246	1895	1610	2208	1304	1543	1448	1738	1502	1813	1625		1798	2206	1628	3161	2517	2004	2826	3666	2611
	3384	2641	3064	2560	3186	3899	2277	3459	2368	2628	4033	2520	2366	2368	2260		1342	1196	1260	1269	2142	1585	2344	1371	1292	1637	2068	1437	1479	1731		2124	3575	2052	3092	2590	2208	2856	2894	2848
	2635	3207	2327	2780	3438	4324	3271	3035	2631	3001	2729	2841	2247	2855	2481		1940	1393	1238	1211	3029	1902	1517	1221	1291	1440	2609	1764	1715	1684		2952	3071	1997	2491	3142	2152	2793	2134	2731
	2525	2380	2654	4108	2447	3235	2532	2317	2447	2285	2725	2402	2862	2823	3490		1912	1949	1349	1658	3021	1489	1473	1076	2134	1430	1906	1789	1458	1697		2749	2091	2864	2918	2607	2092	2621	2291	3479
	2197	2341	2493	2811	2402	4343	2240	3830	2566	2449	2915	2452	2278	2729	2993		1729	1515	1618	1480	1832	1819	1468	1673	1996	1480	1680	1529	1604	1541		2309	2112	2435	3393	2338	2827	2238	2302	3776
	2380	2200	2248	2231	2387	3935	2348	2659	2750	2563	3389	3235	2613	2640	2609		1326	1074	1892	939	1710	1828	1301	2332	2392	1566	1721	1518	1705	1795		2334	2257	1744	2651	2966	2555	3450	2081	2871
	2705	2225	2279	2633	2689	2894	2223	2417	2485	3254	3668	3143	2522	4741	2547		1722	999	1845	1061	2751	3131	2047	2354	1686	1380	1701	1764	1674	1645		2472	2288	1904	2696	2533	2188	3212	2196	2999
	2462	2496	4062	2502	2623	3161	3357	2531	3149	2470	4220	2659	2206	3493	2335		1869	1246	1347	1034	2107	2465	1660	2113	1584	1372	1645	1532	1638	1575		2023	2313	1795	3186	2764	2205	2729	2341	3023
	3162	2469	3657	2352	2408	2927	2380	2689	3142	2386	2759	2359	2106	3505	2500		1954	1130	1321	1566	2144	2748	1429	1536	1644	1642	1592	1501	1571	1697		3001	2392	1795	2752	3722	1972	2719	2202	2634
	2741	3021	3624	2536	2533	2700	2496	3215	2392	2293	2926	2482	2484	2659	2305		1738	1192	1223	1823	2151	1887	1451	1493	1515	1523	1564	1630	1832	2300		1951	2150	1862	2637	2817	1960	2260	1999	3262
	2417	3257	3564	3294	2762	4316	2731	3383	2436	2508	2584	2144	3102	2617	2411		1358	1576	1181	1216	2782	1734	1317	1879	1813	1386	1552	1491	2000	1739		2176	2211	2479	3317	2544	2441	3266	2183	3748
	2683	2186	2632	2368	2391	4099	2476	2542	3430	2127	2805	3154	2220	2465	2422		1291	1796	1093	1094	2877	1604	1257	1396	1854	1378	2405	1552	1502	1786		2162	2921	1802	2607	2449	2188	2654	2530	2772
	3708	2126	2370	2451	2722	3144	2584	2539	2411	2809	2373	2728	2178	2788	3182		1424	1461	1199	1107	1752	1543	1830	1361	2167	1405	1958	1495	1570	1586		2132	2384	1954	2766	2376	1972	2696	2138	2673
	2332	2199	2459	2762	2517	2984	2346	2362	2179	2276	3644	2469	2175	2435	2486		1458	1176	1398	1131	1814	1625	2060	1659	1733	1932	2696	1559	1470	1640		2128	2302	1836	2937	2422	2041	2547	2277	2796
	2548	2446	2455	4041	2317	2938	2447	3323	2232	2338	3592	2507	3143	2521	2501		1590	1069	1737	1343	1967	2285	2088	2610	1647	1389	2272	1610	2056	1730		2716	2405	2134	3175	2612	2149	3562	2105	2654
	2411	2251	2271	3548	2523	2739	2481	2525	2461	2133	2726	2194	2321	2708	2311		2089	1115	1561	1096	2860	1976	1474	2207	1700	1539	1811	1490	1793	1651		2091	2462	2091	2645	2390	1987	2632	2014	2780
	2157	3663	3725	3244	3739	3921	2170	2366	3104	2184	2788	3431	2539	2572	2321		1610	1412	1173	908	2720	2785	1498	2503	1459	1341	1815	1587	1654	2264		2999	2968	1752	2605	2615	1894	2746	2210	4033
	2272	2463	2756	2562	3583	2928	3294	2244	2281	2994	2354	2534	2281	2389	2244		1673	1029	1136	1305	1930	1746	1568	1763	1927	1378	1776	1469	1438	2087		3050	2508	2090	2733	2578	3259	2464	2175	3231
	2458	2369	2156	2508	2542	3107	2510	2528	2623	2336	2770	2409	2287	3164	2221		1499	1609	1147	1669	2201	1706	1326	2021	1539	1367	1750	1546	1470	1669		2936	2229	1994	2668	2790	3077	2525	2122	2827
	2520	2321	2415	2341	2697	2915	2442	3422	2412	2457	2607	2258	2312	2836	3559		1587	1826	1124	1608	2020	2350	1304	1606	1638	1575	1709	1539	1577	1643		2463	2313	2836	3292	3547	2619	3213	2330	2788
	2395	2388	2186	2519	2422	3057	2644	3541	4141	2159	3802	2365	2594	2505	2800		2323	1614	1068	1808	1854	1827	2214	1579	1973	1465	1655	1462	1549	1695		2164	2067	1876	3394	2769	2018	2404	2990	2852
	2366	2362	2357	2569	3336	2791	3833	3727	3490	2465	4486	2151	2330	2974	2501		1432	1236	1130	1222	3028	2138	2346	1427	2420	1932	1740	1548	1492	2264		2317	2896	1977	2601	2524	1897	2702	2502	2776
	3858	2097	3930	2719	2331	4042	2268	2494	2633	3081	3144	3379	2363	2580	2530		2209	1213	1205	1312	2095	2681	1453	2015	1813	1736	2554	1529	1424	2106		3095	3523	1995	2971	2539	2207	2411	2496	2653
	3704	4113	3573	4302	2470	4579	2321	2350	2509	2218	2850	3045	2778	2600	2452		1368	1267	1499	1180	1944	2687	1328	2341	1745	1540	2005	1713	2163	2031		3065	2958	1751	3047	2002	1818	3313	3027	3600
	3390	3430	2372	3494	2386	4277	2148	2336	2464	3338	3949	2974	2339	2375	3419		1981	1714	1615	1118	1521	1901	2108	1616	2163	1385	2153	1834	1773	1738		2244	2392	2990	2530	3541	1853	3111	2937	3937
	2451	2065	2174	2177	2664	2932	2358	3321	3146	2926	3844	2482	2325	2456	3523		1454	1191	1267	1071	2956	1702	2093	1590	1988	1248	1997	1730	1758	1555		2120	2164	2818	3535	3605	1965	2249	2842	3467
	2645	2372	2426	2562	3622	3034	2424	3331	3366	2337	2953	2927	3146	3590	3307		1452	1502	1555	1231	1773	1789	1757	2257	2052	1376	1953	1838	1480	1575		2050	2409	2326	3609	2535	3045	2725	2333	2430
	2522	2305	2186	3335	3487	2913	2539	2381	2364	2170	2867	2963	2959	3176	2513		2193	1911	1288	1199	2962	2451	1527	1896	1830	1439	1883	1510	1570	2312		2924	2067	1672	2810	2245	3072	2636	2154	3872
	3321	3216	1817	3898	3142	3329	2992	2883	2568	2152	2891	3253	2431	3438	2449		2045	1757	1243	1577	1929	1719	1522	2344	1751	1524	1841	1627	1574	2173		2661	2471	2771	2404	3162	2104	2432	2605	3334
	3249	3288	2388	2918	2386	5549	2468	2798	2205	2636	2831	2697	2498	2909	2470		2366	1566	1418	1337	2218	1629	1346	1853	2168	1473	2354	1571	1969	2327		3192	3164	2269	2689	3016	1917	3712	3279	3102
20h	2840	2760	3613	2857	2696	4173	2244	3432	2820	2378	3942	2932	2594	2871	2771	20h	1621	1456	1259	1308	2940	2587	1309	2654	2190	1756	2041	1638	1607	1659	20h	2344	2179	2918	3185	2533	2179	3622	2748	2525
	3698	2499	3261	3208	2777	3112	3050	2953	4077	2712	3648	3773	3213	3203	2647		2355	1364	1828	1298	2811	2378	2089	2882	2057	2067	2774	1719	1848	1626		2175	2718	2595	3787	2652	2950	2892	3012	2490
	3755	4057	3907	4242	3574	4710	3148	4443	4300	2737	3374	2976	3431	3697	3131		1564	1664	1926	1324	2888	2230	2076	2689	2408	1725	2439	1825	2067	1775		3294	2938	3145	3668	2861	2842	4184	2466	4171
	2963	3867	3066	3883	3526	5292	2333	4255	3997	2300	3029	2862	3129	3659	3790		2296	2040	1554	1210	2552	2232	1830	3036	2013	1768	2270	1890	1682	2054		3501	3417	3270	3452	3279	2240	3804	3027	3865
	3893	3784	4120	3963	3138	4578	2903	3734	3799	3051	3108	4062	3498	3625	4209		1949	1475	2099	1470	3099	1900	1708	2707	2128	1934	2096	1627	1791	1842		3350	3163	3262	3061	3895	3235	2858	3072	2818
	3433	2497	3159	3779	2800	3487	2790	3303	2854	3109	3953	4003	2383	3007	3835		2278	1399	2075	1819	2844	2792	1752	2856	1913	1527	2565	1996	2516	1912		2636	3530	2104	2851	3763	3089	3752	2201	3937
	3844	2627	3003	3750	3546	5215	3209	3178	3340	3158	3263	3879	2689	3631	4038		1104	1548	1253	1585	3176	2829	2426	2938	2437	1570	2599	2176	1854	1685		3183	2974	2246	2958	3743	3391	3600	2229	4131
	3826	3656	3211	2931	3635	4607	3404	3405	4195	2684	3908	3822	2788	3034	3383		1523	1668	1266	1195	3476	2836	2380	3054	2201	1548	2172	1625	2130	1653		3120	2684	2463	2944	2842	2149	2850	3135	3036
	3877	4020	4105	3326	4860	3876	3627	3010	4061	2762	3435	2992	3585	2818	2912		1640	1324	1823	1196	3038	2859	2579	2871	1898	1749	2491	1578	1892	2100		2420	3618	2192	3520	3001	3500	2611	2481	4063
	4204	3000	3391	3734	3731	5170	3330	4325	2695	2617	4794	2987	3107	3811	3418		2291	1215	2102	1556	3051	2687	2377	2979	2421	1843	2678	1697	1843	1812		3144	2961	1857	3266	3075	3478	2783	2499	4401
	3016	2506	3995	3744	3300	3777	2893	4296	2691	3861	4203	3133	2747	3720	4158		1499	1811	1852	1466	3108	2591	2163	2978	2165	1436	2578	1614	2008	1855		3217	3569	2838	3698	4098	3089	3811	3942	3357
	3322	3316	3904	3620	3375	3775	3669	4157	3834	3290	4206	3829	3024	3554	3119		1826	1716	2067	1295	3109	3055	1686	2636	1648	1441	2154	1546	1754	2547		3158	3568	2706	3208	3659	3413	3752	3636	3738
	3381	2655	3571	2943	2973	4767	3846	2965	4110	3026	4103	4154	3059	3191	3524		1599	1887	2107	1688	3417	3105	1357	2511	1681	1953	2066	1808	1570	1699		2428	3733	2260	3258	4113	2508	2814	3082	4284
	3397	2657	4031	4018	3647	4591	3411	4309	4416	2803	3147	4105	3947	3285	4323		1554	1464	1921	1719	3101	2470	1804	2503	1798	1772	2398	2099	1643	1531		3018	3650	2833	3905	2860	3216	2907	3075	3374
	3207	4149	4136	3849	4507	5196	4291	4353	2840	2626	3571	4122	3270	4005	4021		2157	1396	1340	1420	2947	2810	2635	2465	1738	1552	2717	1583	1540	1568		3306	3748	2710	3955	2765	3581	4181	2748	4364
	3903	3890	3158	3858	4431	3830	2813	3546	3289	2840	3716	3804	2698	4070	3134		1412	1300	1169	1608	3261	2999	1632	2069	1905	1359	2580	1722	2476	1879		2495	3202	3276	3449	3475	3265	3884	2330	3368
	4058	2962	2947	2951	3557	4978	3530	3990	2632	3347	4553	4047	3133	3910	4324		1263	1358	1285	1837	2829	2967	1766	2112	2442	1495	2188	1648	2123	1952		3171	3735	3196	3996	3897	2572	2908	3631	4227
	3979	2857	3400	3017	4347	5132	3002	3028	3838	2940	4488	4125	3480	3630	3799		1322	1910	1349	1470	3593	2450	1860	1956	1849	1570	2134	1620	1952	1676		2618	3863	2453	4110	3765	3322	4004	3685	4278
	3188	3943	3371	3362	3756	5047	3571	4454	4235	3437	4327	3486	3618	2676	3138		1932	1338	1152	1316	2331	2295	1678	2622	1701	1465	2009	1870	2020	1724		3380	3684	1960	2947	2796	3292	4110	2982	4453
	3608	3962	3805	3612	3980	4014	4195	4397	4006	3482	4107	2905	4077	2748	2935		1652	1171	1233	1197	2704	2070	2020	2412	1630	2033	1923	1941	1588	2092		3239	3457	1797	2683	3454	3563	4085	2594	3187
	3668	4109	4045	3654	2868	4108	3115	4324	2575	2751	2940	3602	2969	3102	3967		2384	1175	1212	1497	2466	2614	2307	2596	1523	1561	2216	1666	1725	1737		2423	3689	1842	3411	4316	3536	3139	2222	3384
	4161	3572	3850	3166	3172	3508	2709	4339	2938	2718	3000	3744	3004	3122	4162		1444	1234	1466	1516	2570	2660	1590	2366	1512	1651	2512	1490	1533	1754		2931	3155	2719	3257	3187	2467	2724	2333	4086
	3605	2544	3040	3339	3517	5300	3344	2684	3814	2890	2979	3896	2769	2991	2918		1334	1156	1637	1811	2567	2755	1761	2119	2063	1522	2007	1655	2159	2045		3206	3472	3078	2901	2925	3106	3135	2732	3314
	3402	3108	3046	3154	3095	4873	3333	2623	3769	2726	3295	3562	2688	3189	3151		1274	1786	1402	1285	2819	2901	2431	2224	2132	1574	1876	1614	1453	2415		2933	3141	3331	3679	3531	2555	2960	2328	2936
	3077	3226	3735	3278	3666	4042	2847	3965	3461	3103	2787	3648	3210	3273	3938		1772	1746	1630	1275	3040	2310	2448	2486	1628	1400	1863	1550	1469	1752		2180	3043	3031	3223	2784	3052	4048	2877	2941
	3013	2666	2850	2740	2794	4255	3053	4018	3157	2826	3882	3230	2593	2883	4013		1587	1299	1364	1184	3476	2163	2211	2865	1513	1700	1802	2028	1510	1388		2216	3537	2082	3609	2757	3021	3792	2389	3922
	2938	2627	3076	3820	3419	3576	3997	2989	3042	3469	4080	3477	2648	3407	3982		2208	1168	1372	1521	2377	1944	2045	2614	1757	2050	1983	2165	1669	1400		2327	2876	1688	2831	4003	2621	2783	2443	4197
	3394	2806	4060	3663	3392	4978	3892	3729	2881	2942	4112	3759	3859	3497	2647		1933	1484	1242	1320	2940	1969	1912	3064	1952	1600	2090	1572	2008	1567		3315	2790	1632	2787	3868	2499	3685	2163	3353
	3234	3652	2848	2499	2964	4821	3257	2568	3216	3191	2686	3075	2695	4110	3394		1586	1541	1703	1386	2952	2574	1759	1949	2099	2324	2221	1827	2105	1856		3203	3625	1693	3552	3544	2792	2962	2587	3481
	3955	2658	3096	2657	3959	3584	3366	4087	3138	2672	3570	2858	2879	3417	3377		1480	1379	1773	1195	3406	2841	1866	1936	1952	1749	2262	1559	1572	2149		2466	3019	2017	3350	2734	3097	4200	3185	2713
	3278	3092	3094	3671	2969	3861	3088	4119	2507	3101	2987	3560	3317	2906	3859		1338	1312	1670	1196	3096	2747	2483	1941	1813	1880	1890	1539	1633	1500		3259	3567	1722	3614	3457	3308	3175	3048	3530
	3818	2642	2965	3474	3526	4222	3754	2585	2781	2927	3718	3669	3245	3529	2954		1275	1901	1470	1074	2684	2862	2297	2152	1816	1763	2018	2087	1643	1799		2619	3177	1978	2934	3912	3107	3987	2624	3787
	3665	3403	3584	2940	2678	4423	3625	3136	3500	3162	2788	3963	4327	2956	2735		1355	1867	2075	1619	2064	2492	1793	1789	1816	1775	1815	1950	2258	1673		2489	3445	2452	3573	2909	3271	3041	2395	3048
	3459	3770	4204	3334	3112	4590	3038	4027	4313	3347	3141	2922	3205	3485	3773		1841	1662	1902	1695	2733	2322	2743	2740	2104	1391	1650	1813	1975	1635		3447	3280	2003	3486	3607	3596	3799	2470	3955
	3360	4017	2918	3521	3754	4640	3834	2991	2805	3185	3209	3232	3607	3995	3252		2089	1859	1751	1622	2696	2011	2324	2590	1957	1230	2118	2344	1992	1951		3361	3239	2771	4000	4170	3419	2987	3272	3708
	3779	3919	4296	3528	4329	3210	2936	3985	4001	2619	4661	3698	3538	3936	3546		1683	1723	1861	1442	1690	3101	2567	2711	1947	1247	2032	2098	2392	1731		3240	3705	2812	4053	4287	3585	4103	2715	4209
	3933	3678	4528	3817	4266	4439	2939	3012	4234	3217	4173	3877	3435	3590	3909		1803	1531	1952	1866	2359	3407	2285	2860	2076	1535	2439	1402	2090	1567		3406	3725	1907	3935	3850	3583	4306	2693	4000
	3618	3551	3724	3721	4564	4846	3427	2664	3842	2691	3621	2772	3316	3685	3775		2191	1693	1996	1353	1700	3205	1791	1924	2094	2035	2482	1905	2153	1986		3306	3769	2656	3922	2553	3397	4208	3377	3965
	3253	2353	2866	3412	4128	4476	3452	4177	4342	2812	3718	3276	3388	2422	3481		2229	1503	1619	1494	2136	3008	1701	1917	2399	1655	2085	1560	1567	1677		3312	3469	2696	3560	2717	3277	3820	2987	3364
	3467	2328	3331	3386	2894	4423	2711	4018	4109	3045	2836	3818	3679	2732	2784		1653	1329	1884	1766	1916	2449	1612	1798	1626	1397	1966	1743	1481	1880		3161	3382	2856	3412	2409	2301	3693	3243	2493
8h	2907	2292	4180	2436	3262	3057	2873	2843	3962	2383	2567	3496	2795	2553	2860	8h	1446	1469	1270	1568	1931	2139	1898	1565	1747	1311	1929	1693	1678	1715	8h	2374	2354	2861	2434	3050	3055	3376	3294	2779
	3535	2597	4417	2631	2920	2663	2745	2150	4270	2152	2699	3437	2544	2798	2614		1404	1174	1214	1358	1571	2831	1613	1611	2257	1264	2399	1502	1363	1380		2061	2872	2336	3240	2658	2965	2775	2404	2796
	3470	3758	3809	2659	3545	3063	3158	2265	4311	2459	2516	3523	3175	4114	4084		1834	2076	1133	1302	1615	2051	1794	1794	1877	1401	2030	1559	1588	1458		3197	2756	2145	2560	2642	2134	2670	2308	2701
	3382	3354	2767	2985	3745	3403	2859	4431	2314	3187	2773	3665	2770	3594	3740		2310	1858	1460	1749	1776	2038	1629	1975	1789	1405	1804	2161	1419	1531		2852	3425	1728	2929	3207	2250	2790	2095	3510
	3002	2216	2447	3878	2238	2982	2186	2918	2742	1988	2651	2420	2881	2566	2596		2114	1464	1062	1219	2053	1949	1478	2056	1676	1397	1750	1999	1533	2004		2249	2237	2804	3021	3590	3041	4395	2388	3756
	3225	2280	2804	3908	2397	3916	2347	2390	2713	2339	4084	2600	3275	2908	2331		1461	1171	1029	1090	2559	1680	1510	1555	1768	1390	1683	1555	1812	1519		2401	2400	2734	2743	2407	2172	2567	3413	2572
	3291	2314	2724	3366	2863	2934	2160	3050	2574	2226	3824	2312	2508	2511	2657		1330	1150	1543	1189	2713	1877	1428	1753	1517	1295	1568	1379	2007	1432		2403	2589	2152	3284	2357	2093	2315	3014	2752
	3137	3542	2311	2215	3752	2861	3952	2406	3818	3587	3501	3479	2605	3043	2728		1274	988	1152	1648	1932	2490	1180	1618	1404	1346	2137	1323	1473	1657		2452	2573	1674	2920	2021	2302	2640	2247	2507
	3038	3336	2445	2214	3857	4859	4175	3683	2551	2950	2583	3094	2529	2676	2354		1124	989	1538	1707	1998	2209	2063	1561	1439	1295	1945	1511	1583	1761		2155	3275	1797	2772	4168	3921	3317	2260	2783
	3414	3349	2468	2496	3228	4852	2709	2121	2384	2654	2827	2739	2320	2941	3415		1276	1550	1350	1816	2076	3383	2781	2740	1411	1859	1814	1679	1755	1455		2338	2657	1949	2689	3328	3044	2359	2232	2832
	2541	2471	3890	2769	2341	3378	2337	2488	2540	2285	2722	2418	2558	2627	3612		1842	1053	1429	1329	2228	2973	2286	2234	1242	1781	1766	1523	1419	1490		2364	2387	1892	2596	2800	2028	2556	2580	2636
	2400	2283	3308	2805	2914	3863	2677	2469	2580	2209	2714	2414	2623	2634	2807		2008	958	1998	1352	1596	2835	1612	2175	1381	1684	1639	1381	1582	1867		3130	2177	1697	2902	2731	2161	2061	2015	2647
	2324	2375	2475	2456	2526	3133	2617	3880	2617	2984	2704	2467	3529	3126	2540		2007	880	1295	1168	1725	2337	2032	1877	1475	1508	1503	1470	1532	1549		2066	2419	2764	3361	2526	2360	2560	2114	2806
	2452	2194	2584	2544	2517	2895	3567	2796	3536	2962	2876	2101	2952	2608	2633		1528	820	1218	1155	1901	1737	1662	1761	1628	1370	1635	2037	1962	1457		2290	2322	2823	2715	2612	2795	2585	2312	3257
	2649	2371	2589	2751	4104	2923	2523	2701	3208	3113	2574	2496	2751	2411	3211		1358	1042	1142	1095	3135	2675	1577	2267	1410	1432	1492	1715	1909	1571		2424	2332	2088	2725	2505	2397	4309	3600	3300
	3036	2213	2343	2457	2883	3803	2385	2646	2689	3020	2798	2588	2527	2772	2239		1305	808	1144	1076	3055	2068	2016	2405	1354	1487	1464	1377	1405	1542		2974	2818	1950	3723	2702	2450	3319	2516	2973
	2166	2471	2599	2312	2576	3036	2345	2495	2846	2989	4041	2526	2510	2702	2667		1325	1082	1067	1005	2133	1729	1640	1695	1318	1382	1489	1687	1376	1497		2981	2926	1796	2436	3567	1923	2464	2474	2552
	2381	2426	2424	2273	2591	3036	2405	2360	2442	2130	3651	2455	2365	2527	2654		1390	836	1021	1007	2560	1910	1452	1618	1226	1483	2032	1425	1514	2016		2156	2313	1866	2473	2160	2719	2488	2280	2702
	2456	2250	3550	2455	2339	3013	3750	3734	2857	2075	2800	2275	2043	2640	2446		1410	727	1025	1430	2132	2189	1485	1547	1441	1443	2099	1403	1746	1544		2370	2070	1899	2561	2715	2067	2574	2332	2519
	2133	2314	2416	2284	2486	4859	2493	2397	2530	2254	2791	3097	2638	2608	2530		1493	1485	1085	1710	2131	2308	1457	1510	1509	1757	2473	1481	1722	1626		2867	2367	1832	2856	2540	2143	2670	2345	2195
	2641	2317	2331	2769	2605	4069	2271	2507	2335	2343	2559	3204	3142	3394	2458		2194	1584	1084	1969	2041	2503	1781	1503	1596	1483	2267	1371	1519	1604		2267	2211	2454	2627	2523	2069	2264	2398	2827
	2631	3518	2341	2539	2432	3068	2230	2396	2583	2127	2920	2433	2325	2556	2363		2025	1391	1079	1260	2174	2432	1516	2243	1615	1556	2047	1697	1412	1552		2464	2163	2037	3058	2062	2234	2387	2520	3079
	2377	2382	2533	3262	2330	2954	2330	2340	2557	2960	2726	2390	2352	2361	2332		2258	1056	1911	1096	2030	1640	1279	1707	2005	1287	1628	1841	1617	1577		2293	2488	2041	2536	2784	2493	2690	2418	3255
	2386	2282	2333	2635	2575	3070	3122	2422	2571	2225	3324	2266	2288	2251	2363		1523	1214	1775	1188	2032	1751	2233	1697	1689	1306	1591	1489	1673	1566		2253	2089	2353	2592	2269	1875	2557	2214	2838
	2253	2279	2648	2477	3345	2725	2964	2358	2748	2065	3382	2214	2336	2438	2120		1420	1706	1950	1168	2047	1769	2325	1562	2025	1382	1537	1386	1699	2289		2973	2508	2868	2608	3237	2138	2454	2399	2544
	3021	3692	3976	2566	3389	2690	3451	2318	2819	2254	2893	2263	2269	2353	3346		1396	1461	1282	1062	2564	2807	1660	1709	1646	1334	1530	1381	1555	1758		3289	2237	2589	2658	2376	3099	3460	2474	2484
	2708	2261	3488	2287	2352	2809	2898	2454	2322	2193	2667	2316	2801	2617	3010		1725	1176	1191	1142	2875	2615	1970	2035	1507	1350	1595	1979	1537	1554		2149	2193	1732	2941	1919	1830	3016	2235	2503
	2431	2323	2624	2474	2384	2742	2738	2400	2312	1975	3576	3324	2432	3630	2266		1532	1262	1783	1906	2402	1873	2186	1884	1586	1789	2085	2013	2308	1639		2262	2375	1940	2648	2406	2319	2788	3187	3215
	2326	2397	2306	2464	2568	4110	2284	2760	2726	1862	2478	3353	2324	3272	2742		1794	1401	1630	2021	1910	2015	1674	2307	1791	2014	1818	1664	2043	1613		2096	2153	1890	2806	2544	2122	2772	3088	3735
	2576	2419	2401	2474	2415	2819	2887	2476	3383	2978	2805	2554	2265	2761	2416		2279	1196	1501	1392	2095	2382	1500	2161	1806	1723	1721	1594	2123	1478		3124	2042	1953	3350	3670	2248	2564	2321	2420
	4318	2297	2305	3465	3002	3214	2561	2337	2771	2286	2659	2451	2103	2578	2316		2049	1419	1328	1553	2589	1670	1315	1566	2134	1415	1617	1475	1506	1895		3428	3994	1629	3308	3446	1797	2560	2295	2356
	3703	2459	2738	3910	2871	2934	2705	3456	2746	2177	2436	2139	2651	2386	2542		1371	1193	1266	1211	2201	2090	2037	1717	2243	1348	1701	1817	1537	1968		2691	3284	2413	2702	2271	2201	3283	2328	2322
	3231	3954	3620	2630	2447	2817	2689	3581	2519	2247	4275	3116	3542	2503	3526		1347	1584	1384	1205	2451	1548	1605	2049	1869	1570	2366	1713	1452	1603		2281	2772	2034	2414	2559	2902	2534	2458	2285
	2461	3873	2519	2754	2312	2981	3262	2949	2063	2078	3577	3508	3560	2786	2443		1439	1397	1238	1336	2052	2027	1632	1966	1691	1377	2859	2121	1591	1515		2324	2306	1908	2444	2292	3275	2703	2108	2846
	2375	3411	2410	2602	2341	3533	2641	2350	2583	2692	2745	2337	2573	2652	2576		1356	1352	1125	1401	2072	2691	1443	1993	1709	1423	2483	1934	1573	1534		2040	2170	2852	2519	3385	2993	2564	3180	2661
	2704	2166	2302	3794	2496	3550	3209	2394	2440	2331	2783	2558	2323	2387	2726		1547	1443	1117	1835	2662	2586	1320	1556	1947	2078	2313	1499	1559	1561		2524	2057	1906	2526	2444	1780	3357	2727	3450
	2716	2364	2660	4074	2435	2866	2270	2427	2613	2952	3926	2584	2408	3046	3170		2140	1989	1804	1640	1703	1965	1931	2019	2694	1916	1951	2080	1925	1589		3179	2508	1714	3118	2028	2166	3397	2753	3933
	2624	2446	3649	3709	2399	2950	2308	3354	3539	2138	2762	2393	2591	3541	3656		2219	1419	1374	2142	1804	1796	2315	1588	2400	2146	1825	1520	2070	1848		3037	2097	2060	2874	3727	1972	2482	2228	2227
	2524	3274	2618	3674	3539	3525	2374	4199	3680	2253	2642	2467	3404	2986	3268		1661	1326	1861	1493	3259	1614	1844	2214	2427	1559	1717	1670	2366	2217		2116	2050	2804	3330	2836	1924	2716	2685	2841
	3295	2383	2612	3921	4087	4122	2354	2731	3729	2854	2784	2694	2613	2738	2433		1569	1873	1492	1329	3319	2395	1439	2047	1958	1484	2208	2075	1694	1763		2396	2379	2677	2466	2214	2734	2998	2457	2702
20h	3415	2462	4063	2617	3169	2981	2569	2477	2645	2426	3687	2545	2355	3967	3024	20h	1633	1547	1589	1297	2215	1852	1462	2507	2007	1624	2779	1885	1758	1514	20h	2492	2493	2046	2954	2710	2096	3652	2573	3906
	3985	3820	3664	2846	2302	4246	3064	2738	2462	2303	3579	2554	3744	3847	3392		1966	1966	1402	1733	2864	1827	1515	2857	2474	2083	2153	1571	1603	1622		3220	3934	3135	3524	4196	2409	3468	3799	4221
	3693	3879	3268	3052	4122	4403	2826	3948	3890	2667	3461	3988	3666	3761	3103		1792	1823	1869	1447	3021	2575	2138	2832	2429	2220	2513	2190	2093	2179		3189	3483	3126	3916	3830	2298	2826	2777	3359
	2692	3915	2854	4169	3660	5205	3762	4166	3207	3582	3780	3685	3287	3869	3681		1626	1709	1875	1701	3165	2473	2094	2859	2402	1612	2634	1821	2071	2039		2586	2975	2492	3548	3247	3102	4111	2914	3246
	3007	3854	3124	4043	2613	4157	3112	4489	4541	3067	3445	3391	3586	3743	3958		1695	1419	1747	1634	2716	2427	1963	2655	2276	1893	2151	2006	2338	2042		3161	3400	3344	2483	3289	3179	3653	2680	3896
	3783	2392	3853	4227	3147	4559	3362	3527	4283	2618	3388	3073	3006	3225	3647		1679	2024	1230	1706	2994	2003	1520	2642	1604	2059	2683	1796	2034	2026		2664	3415	2577	3642	3721	2518	2893	2683	3117
	3778	3541	3690	3390	3744	4805	3093	4413	2936	2257	4349	2924	2976	3658	4090		2069	2113	1193	1451	3139	2840	2698	3096	1959	1910	2720	1651	1662	1628		3222	3359	2534	3083	3569	3250	4143	2597	3085
	2817	4179	2641	3508	4224	3412	3861	4168	3278	3137	4127	2994	3651	4228	4161		2176	2001	2238	1368	2906	2839	2194	2655	1788	1566	2482	2146	1747	1652		3026	3288	2035	2995	2736	2723	4005	3548	3799
	3172	3815	4171	4229	3952	3306	3428	4048	3876	2629	3121	3227	3581	3574	2629		1672	1448	1842	1405	2847	2304	2175	2831	2289	1961	2358	1698	2070	1919		2521	3285	1921	2571	3850	2428	2666	2808	3856
	2931	2763	3112	3810	3189	4763	3848	3238	2538	3280	2814	4024	3674	3205	3094		1812	1352	1749	1466	3016	3053	1115	2736	2289	2054	2317	1986	1978	1831		2587	3355	2720	3567	3904	3515	2758	2601	4039
	3796	2905	4357	4207	2707	3819	3185	4069	3961	2718	3292	3876	3949	3583	3233		1845	1824	2189	1548	2942	3174	2528	2841	2225	1628	2138	1871	1954	2162		3294	2957	2913	3563	3794	2943	3450	2500	3016
	3733	3872	3565	3668	4000	3599	3042	4114	2917	3766	3827	2865	2930	3523	3375		2318	1856	2030	1624	3401	2933	2274	2763	1998	1536	2303	1622	2357	1673		3249	3269	2046	3546	3706	2499	3618	3623	2670
	3824	3753	4283	3802	4231	4831	2944	4411	2819	3753	3799	3465	3014	4135	3081		1483	1366	1477	1571	2709	3273	2713	2951	1830	1601	2102	1961	1697	1550		3114	3438	2102	3144	2894	3390	2873	3297	2655
	3688	2526	3273	4300	4365	3617	3699	3738	3970	3511	3563	3666	3491	4020	4084		1456	1209	1022	1448	2686	3033	1914	2454	1877	2204	2057	1734	1669	1548		2417	3464	1822	3799	3503	3519	3528	2597	4368
	2496	3373	4076	4182	3996	3437	4128	3620	3295	2735	4426	3108	3357	3296	3839		1413	1686	941	1785	3224	3282	1717	2357	2059	1828	2343	1787	2012	2093		3025	3599	2377	3343	3388	3130	4286	2780	3845
	3344	3855	4028	4082	2636	5056	2963	4205	3720	3145	3778	3207	3780	3240	3931		1204	1681	1191	1549	3037	2789	1521	2333	2351	2221	2165	2037	2065	2406		2866	3276	2937	3838	3700	2719	3976	3763	4030
	3823	3371	2840	3890	3566	3708	3120	4557	4360	3948	4023	3763	3980	3955	3613		1282	1350	1114	1603	3512	1991	1674	1786	2124	2296	2466	1732	2082	2242		2364	3568	3212	3925	3729	2735	3867	3228	4142
	3757	2991	3193	3011	4118	3890	3317	4470	4332	3495	3422	4229	3933	3750	4358		1244	1251	1332	1553	2609	1923	1464	1814	1812	1685	2694	1613	1684	1814		3204	3277	2482	2987	2843	3563	2954	3447	3783
	3766	3876	2781	3568	3712	4711	3778	3153	3993	3441	3811	3825	2922	4120	3797		1271	1217	1216	1975	2996	1851	1588	2345	1649	1528	2183	1840	1677	1877		3052	3634	2218	3149	2418	3370	2841	3045	3604
	2867	3938	3975	4074	2345	4199	4211	3906	2579	3435	4353	3828	3751	3834	4200		1065	1088	1413	1740	3264	1728	1258	2829	1547	1446	2032	1423	1656	1535		2452	3616	1918	2929	3462	2528	2927	3096	3703
	3124	3771	4195	3836	3002	3016	3992	3905	3597	3209	4293	3387	3517	3887	4297		1321	1374	2153	2150	2785	1719	2258	2916	1397	1464	1968	1571	1485	1500		2934	2655	2752	3663	2693	3642	2812	2424	3449
	3298	2748	3408	3630	4240	3459	3054	4375	3012	2215	3914	2627	3851	3256	4038		1118	1471	1749	1738	2768	2037	2124	2716	1340	1709	1880	1559	2141	1476		2808	3321	2463	3626	3506	2693	4153	2368	3016
	3242	2929	2719	3818	3966	3133	2681	3005	2782	2762	4048	3062	3173	3222	4053		1260	1273	1585	1510	3203	1698	2634	2821	1526	1744	2142	1998	1537	1772		2701	3483	1937	3730	3887	2980	3633	2422	2944
	3303	3199	3621	2722	2924	4114	3243	2638	4045	3255	3934	3473	3007	4030	3989		1240	1150	1519	1945	3555	3394	2118	2597	1965	1540	2258	1631	1597	2185		2255	2543	1675	3201	3819	2616	3089	2518	2482
	2852	4088	2777	3543	2372	4583	3430	3932	3968	2957	3276	3072	2971	2929	3917		1726	1234	1462	1414	3273	3121	2006	2626	1832	2063	1983	1548	1834	2082		2262	2424	2327	3471	3138	3477	2586	2316	2281
	3185	3458	3568	3578	2516	3400	3153	3066	2432	2843	2949	3584	3544	3318	2561		2177	1284	1432	1375	3321	2686	1787	2014	1685	1552	1896	1872	2394	1935		2805	2267	1728	2868	2822	3296	2544	2332	3142
	3948	2375	3333	3990	3563	2733	2924	2730	3245	3098	3859	3295	3677	3075	3169		1609	1320	1393	1327	3060	2936	1881	1777	1519	1462	1873	1768	1930	2148		2396	3026	1987	3498	2142	2583	2675	2591	2355
	3393	2858	3070	3209	3286	3479	3810	2908	2660	2815	3954	3747	3737	3603	3978		1267	1245	1332	1784	3585	2877	2366	1708	1768	1420	2065	1768	2097	1524		2567	3439	2584	3523	2667	2457	3901	2539	2523
	3835	2756	3550	3720	3599	2524	3141	2530	2854	3415	3046	3842	3606	3728	3898		1187	1347	1555	1493	2839	2790	2656	1697	1379	1694	2070	1722	1710	1429		2335	3284	2372	3865	2982	3286	3253	2289	3393
	3096	3603	3243	3942	2675	2867	3766	2505	2570	2735	3454	3889	2893	3701	2941		1270	1983	2124	1272	2637	2154	2805	1969	1876	1947	1933	1631	1607	1793		3051	3391	1847	3322	3613	3531	2423	2841	2962
	3634	3428	3808	3069	2803	3286	2882	4303	3636	3368	3461	2916	3068	2623	3609		1280	1250	1655	1367	2648	1779	2538	2393	2165	1473	1914	1829	1526	2303		3007	2985	1996	3156	3536	2981	4186	2164	1770
	3406	3090	3930	2794	3534	4904	3680	4057	3298	2854	3037	3173	3333	2780	3396		1725	1640	1905	1955	3565	1861	2562	2725	2070	1689	2350	1784	1584	1923		2814	3336	1989	3261	2827	2946	3940	3324	2083
	3702	3787	3930	3995	3916	3367	3751	3364	3263	3014	3653	2964	3553	3377	3336		1988	1707	2111	1322	3067	1834	2015	2760	1731	1593	2166	1928	2109	1699		2441	2402	1903	3263	2482	2696	3963	2713	1969
	3867	3665	3766	3751	3905	2836	2744	2889	4002	2827	4174	3449	3479	3834	3790		1453	1796	1938	1899	2644	2882	1811	2558	1693	1925	2712	1581	1991	1596		3169	2944	1905	3238	3966	3332	3905	2478	3179
	3283	3526	2857	3234	2804	3338	3703	4009	4279	2784	3475	3642	3795	2927	3815		1988	1396	1860	1647	3617	2791	1731	1874	2163	1587	2143	1748	2321	1571		3412	2767	2127	3731	3735	3484	3748	2847	3297
	3571	3068	4116	4090	3556	3512	3991	3952	2921	2801	3312	3139	3482	3933	3460		1516	1606	2283	1741	2644	2782	1869	1670	2233	1405	2187	2245	2195	1741		2550	3443	2787	3929	2797	3401	3605	3271	3244
	3512	4142	4014	3989	2777	4015	3291	2952	3797	2580	3686	3508	3864	3705	3013		1398	1753	1974	1699	2465	2749	2490	1614	2135	1259	2772	1611	2040	1652		2225	2530	2413	3103	3460	3389	3637	2208	2526
	3184	3543	3110	3816	4473	3834	2914	4046	4480	3231	4189	3583	3755	3405	2932		1229	1428	1516	1736	2417	1943	2626	1420	2351	1195	2330	1420	1694	2202		3325	3572	1945	3571	3683	2604	3526	3522	1867
	2662	2585	3107	3599	4186	2917	2889	4380	4633	3149	3994	4026	4038	2934	3502		1456	1936	2234	2042	2291	1766	1913	1958	2329	1219	2941	1696	1870	2059		2897	2408	2890	3758	2603	3027	3197	3759	1561
	3833	2104	2740	3042	3803	2428	2560	3716	4049	2991	3488	3625	3671	2784	3080		2125	1375	1868	1405	2151	1594	1717	1651	1551	1202	2757	2206	1812	2125		3174	2874	2953	3592	2165	3246	2250	3369	1840
8h	3191	2263	2866							3243	2729	2925	2831	2361	3619	8h	1998	1206									2584	1557	1593	1589	8h	2829	2974	2858				1756	2555	2178
	2800	2202	2442							2442	2813	3717	3026	4328	2702		1313	1096									2185	1507	1909	1553		2420	2029	2763				1857	2443	3361
	2101	2428	3717							3203	3211	2843	2802	3179	3209		1174	1147									1919	1451	1497	1913		2294	2342	2098				1939	2368	2043
	2666	3010	2075							2098	2680	2336	3745	2276	3381		1155	1043									1902	2152	1379	1628		2647	2200	1786				2049	3053	1636
	2329	2035	2535							2815	2836	2711	2943	2632	2363		1114	969									1801	908	1428	1416		2179	1990	1663				2128	3026	2196
	3414	4075	2646							2810	2639	3171	2504	2829	3181		1029	1780									2323	1693	1441	1454		2267	2764	2357				4260	2798	1995
	2214	2484	2454							2745	2728	2193	2431	2921	3241		1090	1427									1898	1439	1461	1538		2822	2383	1570				2738	2310	2003
	2311	2204	3330							2584	2712	2538	2700	2763	2385		1232	1163									1865	1502	1731	1615		1932	2324	2042				1732	2371	1977
	2244	2175	2221							2120	3094	2218	2622	2602	2885		2126	1065									1725	1923	2368	1482		2145	2265	1864				2007	2417	2387
	3981	2278	2304							1972	3605	2402	2643	2403	2603		1858	1038									2396	1576	1864	1648		2800	2018	1883				2193	2976	2228
	2640	3364	2357							3285	2475	3387	2412	2576	2988		1313	961									1703	1453	1454	1573		2206	2141	2048				2669	2259	3866
	2122	3279	2310							2028	3150	2207	2384	2464	2642		1253	986									1571	1538	1352	1449		2946	2305	1936				2485	2246	1701
	2567	2309	2181							2431	2621	2605	2460	2436	2718		1128	830									1584	1572	1536	1832		2033	2094	1903				2277	2039	2506
	2431	2405	2324							1902	2856	2271	2283	2525	2970		1421	848									2325	2012	1578	1671		2256	2022	1905				2294	2239	2735
	2332	2178	2312							1865	2703	2257	2338	2576	2592		1315	878									1880	1761	1771	1853		2265	2668	1901				3691	3347	2145
	2325	2135	2469							3213	3787	3912	2436	2330	2684		1349	829									1800	1509	1404	1467		1980	1925	2634				2092	2489	2349
	2273	2855	2076							2929	2363	3444	2287	3775	3518		1231	1113									1596	1478	1662	1430		1888	1975	2487				2371	2390	2084
	4046	2320	3925							2017	3639	3353	2265	2057	2370		1563	1558									1582	1490	1534	1431		2259	2394	1977				2323	2450	2096
	2842	2826	3314							2203	3448	2512	2489	2500	2489		2220	1526									2020	1484	1565	1362		2184	2183	1955				2510	2315	2386
	2179	2108	2420							2162	2583	2536	2328	2157	2529		1475	962									1810	1280	1571	1562		2741	2217	1693				2728	2163	2960
	2231	2345	2374							2052	2673	2315	2336	2327	2548		1733	1033									2545	1414	1943	1716		2931	2368	1927				1998	2393	2317
	2131	2875	2273							3101	2653	2465	2749	3006	2423		1296	1149									2514	1639	1716	1497		2084	3070	1604				2112	2884	2231
	3359	2334	2204							2272	2400	2221	2239	2249	2139		1295	1372									2173	1664	1642	1393		2435	3043	1704				2365	3047	2050
	2092	2338	2296							2301	2723	2294	2384	2536	2425		1300	1153									2181	1558	1546	1392		2263	2126	1924				2484	1998	2587
	2274	2306	3574							2175	2894	2534	2328	2350	2760		1174	1138									1793	1563	1472	1663		2921	2425	1861				2295	2506	3028
	3030	2173	2108							2153	2301	2547	2741	2328	3565		1262	1188									1771	1461	1564	1742		2443	2253	2456				3368	2496	2857
	3459	3679	2236							2132	2473	2384	2318	3866	2781		1289	1727									1735	1483	1769	1823		2896	2205	1983				1824	2209	1847
	3931	3275	2501							2110	2760	3722	2523	3082	2682		1257	1294									1647	1545	1871	1417		2048	2213	1890				2502	2388	2375
	3355	2234	2246							2212	2552	2172	3352	3208	3318		1821	1155									1561	1882	2387	1501		2106	2090	1925				2419	2217	4286
	2820	2452	2733							2064	2609	2279	3366	2462	2386		1710	1240									1560	1414	2043	1498		2409	3419	1708				2448	2193	3599
	2573	1958	3733							1881	3778	2370	2345	2278	2508		1436	1513									2189	1524	2088	1556		2924	3140	1868				2346	2489	2424
	2343	2078	2755							3423	3433	2318	2450	2366	2463		1366	1336									2578	1604	1628	1385		3029	2039	1878				3658	3270	2323
	2439	3139	2474							2994	3010	2093	2387	2236	2559		1347	1239									2446	1858	1527	1412		2009	1982	1944				3200	2605	2417
	3744	2413	2597							2250	2799	1997	2364	3206	2356		1502	1314									2100	1407	1637	1664		2223	1938	2175				2010	2344	2452
	2787	2254	2982							2145	2627	3169	3165	2280	3406		2439	1626									1912	1831	1611	1607		3301	3030	2660				2391	2645	3684
	2224	2118	2278							1981	2418	2227	3227	2362	3489		2374	1757									1810	1372	1787	1484		3217	2108	2138				2448	2445	2628
	2313	2157	2486							2029	2536	2968	2266	2688	3244		1572	1311									1389	1821	1877	1422		2536	1976	1575				2963	3135	2415
	3405	2285	2493							3055	3378	471	2416	3569	2589		1402	1247									2401	1636	2288	1539		2844	2141	1905				3464	3071	2525
	3414	2834	2580							2223	2905	2395	2436	2493	2638		1428	1414									2692	1592	2003	1437		2169	2937	2497				2288	2645	4019
	2621	3187	3596							1926	2949	2315	3098	2650	2476		2043	1281									2072	1520	1752	1661		2317	3137	2401				2344	2211	3551
20h	3497	3778	2427							2862	4078	3505	2719	2634	3328	20h	2373	1472									2216	1604	1626	1848	20h	2357	2322	2378				3674	3606	2646
	3611	2368	2795							2348	3317	3464	2653	4114	2789		1562	1406									2534	1609	1892	2188		2625	3098	2022				3901	3294	2897
	3540	3463	3914							3634	3841	3410	3490	3684	4040		1552	1911									3056	1726	2345	1853		2302	3406	2805				3125	2835	3892
	3393	3908	2959							2894	3331	3145	3316	3713	3780		1801	1813									2322	1461	2271	2009		3367	2911	2703				3736	3360	3079
	3221	3605	3055							2846	3559	2564	2742	2856	3971		2039	1743									2595	1406	2207	1505		2631	2869	2043				3470	3761	3906
	3766	3275	4021							2375	3303	3181	3040	3506	3388		1787	1360									2569	1165	2008	1741		2464	2741	2853				3545	3571	3827
	3465	2783	2771							3414	3786	3483	3478	3192	2806		1726	1417									2366	1658	2032	1389		2501	2740	2804				3731	2980	2992
	2979	3371	3757							3320	3961	2973	3572	2998	3981		1500	1764									2261	1428	1655	1546		3129	3222	2178				3378	3304	2790
	3314	3765	3329							3377	3789	2837	3028	3930	3608		1520	1545									2646	1901	1684	1365		2383	3209	1937				3894	3627	3766
	4147	2608	3185							2614	3980	3851	3524	3562	3859		2247	1351									2660	1584	1838	1488		2769	3241	1839				3652	3255	3797
	3696	2538	3838							2640	3400	3934	3541	3395	3893		1503	1274									2391	1127	2256	1384		3257	3524	2200				2781	2858	3696
	2680	3877	3586							3050	4363	3108	3734	2992	4063		1864	1330									2232	1342	1953	1442		2311	3225	2062				3724	3664	3488
	3387	2835	3947							2594	3887	2755	3118	3067	4128		1401	1357									2446	1146	1878	1511		2875	3570	1800				3330	3202	3304
	3249	2228	3972							3450	4138	3712	3091	3767	4171		1332	1278									2733	2067	1731	1380		3106	2863	2804				3869	3382	3683
	3264	3870	3493							3601	3413	3961	3916	3317	3945		1516	1278									2629	1413	1665	1750		2488	3348	2924				3008	3777	3537
	3205	4025	4138							3611	3873	3762	3819	3043	2941		1227	1289									2182	1564	2302	1502		3327	3539	2348				2642	3544	3104
	3880	4102	3196							2572	4359	3327	3258	3454	3092		1135	1415									1944	1410	2260	1478		2692	2684	1947				3003	3350	2892
	3532	4031	2997							2699	3519	3235	3344	3573	3762		1119	1483									2728	1696	1937	1596		2785	3432	1849				3670	2947	3659
	2945	3791	3527							3286	3725	2817	3778	3376	3711		1937	1062									2859	1084	2169	1528		3116	3368	2768				4082	2621	2867
	2916	3722	3987							3398	3590	3483	3876	2686	3194		1653	1675									2794	961	2024	1681		3451	2460	2879				3788	2986	3001
	2807	2565	4246							3557	3547	3173	3129	3231	3816		1970	1395									2775	1469	1962	2194		3308	3416	2037				3803	2972	3004
	3527	3036	3805							3461	4164	3584	2916	3792	3941		1293	1224									2250	1909	1569	2402		2886	3409	2555				3802	3408	3337
	2888	4212	3270							2300	3977	4163	3471	4024	3425		1238	1117									2155	1271	1500	2027		2146	3211	2737				2807	3701	3404
	3697	3724	2913							2835	4106	3987	3306	3353	3120		1162	1393									2099	1423	1474	1805		2117	2509	2521				2460	3674	3972
	3840	3203	2907							2763	3325	3881	3437	3340	3673		1154	1287									2127	1744	1526	1572		2093	2067	1673				2571	3681	3035
	2576	2810	2983							3021	3790	3080	3052	3920	3038		1227	1124									1929	1322	1544	1492		2525	2238	1568				2571	2559	2609
	3240	3212	3074							2823	4062	2364	3220	3241	3865		1229	1329									2259	1235	1760	1663		2112	2218	1561				2766	2569	2992
	2701	2828	4357							3446	3391	3263	3038	2906	3805		1769	1384									2173	1603	1737	1621		2237	2213	1512				2968	2225	3009
	2848	3573	3321							2744	3910	3355	4063	2772	3512		1697	1263									2041	1886	1654	1806		2206	2182	1749				3309	2337	3777
	2926	3438	3206							3372	2931	2675	3165	2669	3245		1807	1641									1929	1397	1829	2113		2539	3349	1858				3453	2454	3109
	3506	2269	3224							3228	4008	3570	3433	2949	3606		1408	2006									1865	1393	1643	1571		3321	3505	1945				2706	2413	2819
	3019	3237	3226							3249	4359	3611	2780	4068	3378		1229	1369									2300	1469	2101	1482		2755	2275	1987				2833	2242	3347
	2661	3394	3076							2800	3325	2523	3697	3935	3132		1258	1262									2150	1907	1846	1473		2568	2163	2045				3561	2555	3300
	3808	2609	3169							3013	3870	2901	3871	4021	3555		1215	1526									2057	1797	1853	1572		2088	2605	2824				2852	2484	3958
	3492	2940	3367							2845	3849	3281	3358	3852	3583		1969	1400									2207	1735	2338	2034		3286	3227	2676				3333	2675	2794
	2770	3687	4000							3392	3074	2984	3854	3903	3244		1574	2186									2560	1582	2448	1996		2815	3065	2615				3830	2554	3909
	3264	3920	4048							2624	4428	2699	4095	2627	3784		1322	1657									2932	1613	2106	1365		3160	2279	1927				3983	3120	3119
	3389	3555	3627							3450	4217	3530	4106	3785	2797		1652	1993									2712	1630	1686	1222		2945	3161	2013				3730	3508	3466
	2392	3402	2407							2683	4145	3453	3759	3624	2867		1749	1723									2259	1518	1568	1545		2488	3293	2692				3464	3201	3738
8h	2519	3374	3001							2625	3751	2725	3212	3657	3091	8h	1624	1562									2109	1432	1598	1594	8h	1764	3187	2588				2352	2428	3015

## Sheet: Fig 2G
Average Resting Exchange Ratio
Dark phase				Light phase				24h
Ubi	LepRNull	Ubi-LepRNull		Ubi	LepRNull	Ubi-LepRNull		Ubi	LepRNull	Ubi-LepRNull
0.95868	0.977235	1.00826		0.864256	0.974331	0.905756		0.906916	0.973528	0.954584
0.964265	0.981865	0.97658		0.880063	0.961319	0.866931		0.921309	0.969638	0.919384
0.948665	0.9218	1.00541		0.854819	0.8992	0.929469		0.896231	0.9035	0.961544
0.993444	0.96291	0.917313		0.9033	0.97613	0.771617		0.947004	0.96501	0.842946
0.921819	0.98093	0.943231		0.860575	0.98382	0.839283		0.894379	0.97663	0.889038
0.961588	0.94428	0.946781		0.870075	0.94338	0.858775		0.915129	0.94174	0.897454
0.915581	0.94719	0.978195		0.844367	0.93383	0.862888		0.880988	0.9381	0.9166
0.943719	0.96408	0.975275		0.836367	0.94929	0.919738		0.891475	0.95495	0.948934
0.949256	1.01789	0.97765		0.857767	1.00192	0.877313		0.904146	1.0092	0.919072
0.942785	0.96364			0.892306	0.95671			0.915666	0.95589
0.97943	1.00205			0.883013	0.97962			0.926781	0.99114
0.97076	0.92593			0.860218	0.92325			0.915376	0.91848
0.980695	0.93203			0.912788	0.93737			0.945519	0.93071
0.948445	0.93833			0.873644	0.94468			0.908478	0.94809
0.992055				0.89815				0.944159

## Sheet: Fig 2H
Respiratory exchange ratio
Time of day	Ubi															Time of day	LepRNull														Time of day	Ubi-LepRNull
18h	0.846	0.85	0.864	0.998	0.837	0.875	0.799	0.942	0.873	0.894	0.887	0.838	0.952	0.881	0.925	18h	0.946	0.943	0.8	0.748	0.958	0.91	0.922	0.948	1.023	0.904	0.964	0.885	0.89	0.919	18h	0.889	0.879	0.944	0.939	0.818	0.82	0.91	0.911	0.998	0.927	0.92
	0.853	0.844	0.868	0.971	0.882	0.949	0.936	0.925	0.899	0.934	0.817	0.913	0.984	0.912	0.936		0.944	0.957	0.874	0.77	0.949	0.884	0.873	0.938	1	0.914	0.985	0.856	0.906	0.911		0.927	0.851	0.956	0.903	0.808	0.824	0.916	0.894	0.968	0.951	0.932
	0.93	0.891	0.918	1.038	0.907	0.874	0.887	0.955	0.923	0.931	0.816	0.901	1.008	0.928	0.884		0.929	0.977	0.861	0.775	0.899	0.966	0.992	0.983	0.958	0.912	0.984	0.847	0.902	0.955		1.027	0.869	0.977	0.899	0.797	0.803	0.897	0.892	1.02	0.944	0.914
	0.92	1.043	1.31	1.016	0.888	0.855	0.867	0.989	0.896	0.946	0.808	0.89	0.944	0.872	0.853		1.057	1.25	0.905	0.837	0.943	0.904	0.945	1.009	0.986	0.942	0.96	0.856	0.854	0.895		1.012	0.894	1.174	0.89	0.817	0.88	0.881	0.893	0.939	0.907	0.863
	0.941	0.925	0.992	0.973	0.878	0.875	0.877	0.952	0.871	0.938	0.827	0.88	0.975	0.876	0.875		1.01	1.059	0.884	0.786	0.969	0.861	0.964	0.959	0.981	0.894	0.97	0.871	0.866	0.895		0.982	0.907	1.03	0.83	0.902	0.869	0.839	0.928	0.962	0.956	0.871
	0.907	0.936	0.987	0.967	0.803	0.904	0.87	0.969	0.901	0.923	0.844	0.846	0.974	0.878	0.89		0.967	1.02	0.884	0.774	0.911	0.931	0.91	0.983	1.045	0.88	1.015	0.869	0.856	0.946		0.953	0.923	1.036	0.802	0.928	0.882	0.862	0.933	0.994	0.963	0.896
20h	0.915	0.917	0.945	0.983	0.93	0.979	0.955	0.929	0.947	0.932	0.835	0.867	0.928	0.909	0.888	20h	0.925	0.963	0.856	0.867	0.967	0.872	0.873	0.884	0.993	0.918	0.978	0.897	0.855	0.946	20h	0.927	0.857	1.037	0.842	0.965	0.837	0.884	0.913	0.979	0.917	0.965
	0.934	0.886	0.908	1.014	0.857	0.863	0.893	0.924	0.953	0.914	0.84	0.938	0.888	0.946	0.884		0.956	0.978	0.894	0.802	0.912	0.983	1.002	0.967	0.953	0.905	1.006	0.812	0.891	0.916		0.949	0.848	0.991	0.949	0.918	0.886	0.943	0.938	0.982	0.901	0.951
	0.959	0.929	0.975	1.011	0.86	0.892	0.88	0.986	0.956	0.998	0.834	0.882	0.932	0.929	0.94		0.962	0.982	0.876	0.772	0.913	0.928	0.943	0.956	1.003	0.934	1.001	0.846	0.855	0.925		0.964	0.866	1.021	0.96	0.842	0.843	0.9	0.88	0.981	0.947	0.958
	0.909	0.925	0.942	1.042	0.868	0.965	0.917	0.953	0.949	0.894	0.864	0.897	0.96	0.961	0.973		0.966	0.966	0.877	0.818	0.928	0.902	0.956	0.946	1.003	0.932	0.979	0.885	0.881	0.943		0.973	0.916	1.008	0.931	0.867	0.908	0.942	0.978	1.001	0.987	0.893
	0.949	0.93	0.939	1.02	0.931	0.975	0.867	0.905	0.949	0.942	0.889	0.954	0.987	0.959	0.954		0.938	0.947	0.856	0.762	0.953	0.907	0.914	0.916	1.047	0.924	0.989	0.883	0.882	0.934		0.954	0.917	1.041	0.969	0.889	0.876	0.971	0.943	0.989	0.943	0.897
	0.926	0.939	0.99	1.013	0.947	0.973	0.941	0.975	0.982	0.964	0.937	0.951	0.956	0.949	0.951		0.969	0.986	0.862	0.772	0.927	0.893	0.924	0.904	0.984	0.936	1.026	0.893	0.872	0.954		0.987	0.926	1.026	0.944	0.919	0.874	0.961	0.995	0.985	0.935	0.964
	0.969	0.92	0.977	1.002	0.978	0.98	0.96	0.994	1.004	0.935	0.949	0.966	0.975	0.975	0.987		0.957	1.002	0.901	0.86	0.918	0.918	0.898	0.956	1.011	0.94	0.988	0.866	0.899	0.929		0.981	0.961	1.067	0.942	0.91	0.899	0.931	0.992	0.97	0.953	0.938
	0.977	0.967	0.99	1.033	1.011	1.016	0.989	0.937	0.984	0.964	0.953	0.932	0.96	0.961	0.999		0.945	0.964	0.889	0.883	0.928	0.904	0.933	0.934	1.009	0.957	0.991	0.846	0.877	0.922		0.99	0.959	0.999	0.938	0.975	0.93	0.959	0.984	0.983	0.968	0.975
	0.981	0.972	0.966	0.98	0.939	0.949	0.839	0.993	0.998	0.946	0.937	0.989	0.97	0.945	0.988		0.966	0.991	0.904	0.881	0.904	0.95	0.922	0.961	0.999	0.896	1.014	0.835	0.804	0.933		0.989	0.975	1.027	0.924	0.943	0.913	0.977	0.956	0.961	0.938	0.95
	0.945	0.95	0.995	1.043	0.975	0.981	0.997	0.961	1.015	1.002	0.949	0.985	0.982	0.97	0.983		0.959	0.978	0.913	0.892	0.9	0.892	0.854	0.945	1.056	0.921	1.016	0.844	0.823	0.922		0.989	0.985	1.055	0.963	0.904	0.902	0.978	1.006	1.018	0.956	0.969
	0.972	0.987	0.97	1.034	0.908	0.978	0.944	0.976	0.963	1	0.939	0.984	0.959	0.969	0.975		1.016	0.971	0.916	0.858	0.911	0.975	0.967	0.985	1.034	0.968	0.978	0.862	0.836	0.921		0.996	1.023	1.023	0.901	0.94	0.943	0.97	0.99	0.997	0.969	0.987
	0.974	0.989	0.959	1.011	0.972	1.001	0.939	0.994	1.004	0.933	0.951	0.968	0.956	0.978	0.977		0.99	0.967	0.9	0.848	0.915	0.912	0.903	0.904	1.022	0.917	0.994	0.882	0.904	0.935		1.015	0.999	0.999	0.881	0.952	0.918	0.958	1.014	0.983	1.006	0.95
	0.969	1.02	1	0.989	0.944	0.971	0.92	0.937	0.962	0.948	0.939	0.997	0.924	0.941	0.98		0.988	0.979	0.93	0.865	0.952	0.915	0.936	0.947	0.99	0.943	1.018	0.887	0.87	0.925		1.008	0.989	1.029	0.913	0.922	0.906	0.978	1.011	0.993	0.961	0.953
	0.95	0.985	1.02	1.05	1.019	1.02	0.988	0.946	0.974	0.99	0.897	0.985	0.982	0.961	0.985		0.962	0.971	0.912	0.891	0.945	0.911	0.899	0.939	1.028	0.944	1.027	0.883	0.886	0.945		0.996	0.968	1.018	0.936	0.975	0.952	0.987	1.005	0.988	0.986	0.994
	0.976	0.981	1.013	1.018	0.943	0.985	0.944	0.948	0.98	1.005	0.969	0.993	1.019	0.974	1.05		0.973	0.976	0.893	0.877	0.943	0.954	0.962	0.975	1.003	0.919	1.01	0.854	0.869	0.945		1.003	1.01	1.038	0.923	0.964	0.952	0.974	0.989	0.996	0.989	0.996
	0.951	1.004	0.983	1.037	1	1.025	0.986	0.986	0.985	0.971	0.97	0.981	0.992	0.956	1.009		0.971	0.988	0.908	0.871	0.921	0.885	0.918	0.907	1.013	0.946	1.039	0.847	0.84	0.931		0.991	1.002	0.99	0.914	0.968	0.964	0.968	1.029	0.999	0.975	0.981
	0.954	1	0.963	1.047	0.952	0.975	0.929	0.972	0.947	0.95	0.963	0.964	1.009	0.962	0.989		0.925	0.956	0.922	0.883	0.923	0.937	0.938	0.994	1.039	0.943	0.985	0.871	0.852	0.92		0.994	0.954	0.996	0.879	0.979	0.948	0.945	1.005	1.014	0.983	0.998
	0.987	0.994	0.958	1.001	1.026	1	0.977	0.962	0.965	0.959	0.964	0.984	0.995	0.965	0.993		0.95	0.994	0.909	0.889	0.934	0.92	0.939	0.952	0.936	0.913	1.063	0.851	0.845	0.957		0.984	0.974	0.989	0.897	0.97	0.941	0.993	1.023	0.992	0.958	0.984
	0.942	0.968	0.969	1.064	0.981	0.979	0.995	0.976	0.993	1.004	0.974	1	0.974	0.97	0.996		0.969	0.958	0.909	0.913	0.937	0.919	0.948	0.963	1.038	0.931	1.032	0.836	0.911	0.946		0.985	0.989	0.976	0.905	0.955	0.942	0.994	1.023	0.998	1.002	0.98
	0.964	0.987	0.91	1.031	1.023	1.003	1.008	0.947	0.971	1.009	0.977	0.995	0.975	0.942	0.993		0.959	0.998	0.923	0.903	0.951	0.95	0.957	0.966	1.021	0.988	1.039	0.864	0.93	0.977		1.025	1.001	1.005	0.907	0.976	0.944	0.945	1.03	1.005	0.963	0.995
	0.961	1.018	0.945	1.005	0.934	0.958	0.929	0.935	0.981	0.983	0.981	0.966	0.957	0.94	0.972		0.942	0.988	0.923	0.917	0.939	0.958	0.94	0.975	0.982	0.986	1.029	0.885	0.875	0.963		1.011	1.006	1.003	0.916	0.936	0.93	0.945	1.025	0.982	0.958	0.985
	0.946	1.007	0.957	0.997	0.977	0.963	0.988	0.973	0.966	0.928	0.99	0.976	0.958	0.92	0.956		0.929	0.976	0.904	0.919	0.913	0.898	0.912	0.884	0.973	0.961	1.018	0.84	0.897	0.937		1.013	0.993	1.015	0.884	0.995	0.936	0.973	1.057	1.025	0.94	0.984
	0.914	0.98	0.944	1.003	0.938	0.981	0.954	0.969	0.937	0.876	0.985	1.002	0.932	0.895	0.964		0.976	0.978	0.906	0.906	0.948	0.978	0.961	0.996	1.046	0.912	1.056	0.865	0.868	0.961		0.946	1.012	0.989	0.898	1.01	0.907	0.978	1.053	0.987	0.935	0.998
	0.936	0.997	0.905	0.985	0.971	0.971	0.93	0.994	0.951	0.923	0.987	1.008	0.922	0.942	1		0.968	0.988	0.908	0.92	0.963	0.895	0.905	0.93	0.993	0.934	1.004	0.839	0.896	0.927		0.979	1	0.913	0.915	1.003	0.932	0.968	1.017	0.994	0.955	0.947
	0.886	0.993	0.915	0.956	0.964	0.972	0.97	0.981	0.985	0.948	0.976	0.99	0.967	0.939	1.011		0.953	0.951	0.899	0.912	0.962	0.953	0.958	0.992	0.936	0.955	1.033	0.862	0.913	0.946		0.963	1.002	0.893	0.905	0.965	0.901	0.922	1.03	1.008	0.991	0.946
	0.911	0.987	0.919	0.946	0.934	0.948	0.966	0.927	0.925	0.906	0.965	0.956	0.925	0.942	1.001		0.906	0.991	0.929	0.963	0.92	0.913	0.905	0.963	1	0.965	1.038	0.896	0.902	0.961		0.982	1.006	0.969	0.909	0.973	0.856	0.894	1.023	0.986	0.945	0.916
	0.913	0.957	0.925	0.897	0.929	0.885	0.972	0.995	0.965	0.91	0.973	0.935	0.906	0.913	0.962		0.894	0.967	0.917	0.93	0.95	0.97	0.954	0.957	0.978	0.925	0.993	0.881	0.926	0.925		0.918	1.009	0.982	0.88	0.981	0.916	0.909	1.052	0.983	0.956	0.88
	0.897	0.952	0.953	0.923	0.835	0.827	0.917	0.975	0.932	0.922	0.957	0.966	0.891	0.918	1.014		0.941	0.99	0.939	0.932	0.963	0.958	0.96	0.965	1.01	0.92	0.988	0.87	0.893	0.967		0.947	0.988	0.966	0.934	0.925	0.932	0.964	0.99	0.953	0.959	0.899
	0.877	0.946	0.921	0.935	0.935	0.924	0.969	0.964	0.93	0.926	0.955	0.964	0.874	0.885	1.005		0.931	0.959	0.927	0.93	0.95	0.917	0.897	0.97	1.004	0.972	0.92	0.868	0.923	0.956		0.964	0.964	0.994	0.943	0.978	0.938	0.919	0.979	1.01	0.945	0.805
	0.858	0.915	0.872	0.91	0.898	0.883	0.909	0.965	1	0.922	0.986	0.985	0.891	0.837	0.99		0.87	0.97	0.9	0.961	0.926	0.973	0.94	0.968	0.966	0.96	0.987	0.86	0.896	0.934		0.969	0.934	0.982	0.875	0.966	0.948	0.92	0.993	0.981	0.946	0.914
	0.895	0.898	0.887	0.913	0.87	0.902	0.94	0.938	0.943	0.932	0.888	0.976	0.867	0.824	0.991		0.933	0.914	0.915	0.927	0.925	0.91	0.901	0.947	0.969	0.922	0.995	0.878	0.925	0.939		1.006	0.949	0.985	0.894	0.97	0.96	0.939	0.981	0.983	0.972	0.918
	0.921	0.915	0.839	0.919	0.784	0.876	0.841	0.953	0.923	0.894	0.887	0.991	0.904	0.909	0.974		0.96	0.999	0.899	0.948	0.952	0.93	0.967	1.007	1.03	0.887	1.024	0.877	0.945	0.965		0.971	0.892	0.977	0.904	0.941	0.912	0.97	0.94	0.979	0.936	0.904
	0.906	0.926	0.85	0.914	0.936	0.895	0.894	0.981	0.958	0.903	0.926	0.958	0.926	0.884	0.992		0.956	0.998	0.884	0.949	0.98	0.881	0.907	0.904	0.974	0.972	1.024	0.892	0.89	0.962		0.976	0.907	0.933	0.935	0.957	0.931	0.958	0.86	0.946	0.918	0.851
	0.921	0.937	0.917	0.954	0.929	0.928	0.917	0.939	0.909	0.923	0.955	0.915	0.883	0.95	0.99		0.96	1.02	0.885	0.943	0.965	0.934	0.946	1.003	1.03	0.977	1.027	0.872	0.93	0.974		1.003	0.918	0.945	0.891	0.974	0.917	0.962	0.926	0.985	0.981	0.827
	0.961	0.926	0.929	0.904	0.916	0.917	0.889	0.945	0.978	0.922	0.942	0.896	0.902	0.954	0.982		0.932	1.007	0.889	0.934	0.981	0.917	0.929	0.946	1.004	0.992	0.989	0.887	0.915	0.965		1.002	0.946	0.945	0.942	0.963	0.947	0.968	0.964	0.982	0.975	0.959
	0.936	1.003	0.953	0.933	0.916	0.969	0.898	0.95	0.971	0.937	0.911	0.888	0.959	0.942	0.992		0.971	0.959	0.916	0.955	0.989	0.943	0.933	0.932	1.071	0.93	0.998	0.909	0.921	0.955		0.998	0.963	0.892	0.917	0.963	0.957	0.994	0.935	1.004	0.929	0.961
	0.965	0.983	0.949	0.913	0.961	0.959	0.902	0.913	0.958	0.938	0.948	0.854	0.924	0.952	0.991		0.941	0.994	0.925	0.963	0.954	0.931	0.94	0.96	0.975	0.951	0.933	0.898	0.907	0.936		0.984	0.961	0.965	0.923	0.957	0.947	0.954	0.914	1.014	0.97	0.958
	0.935	0.98	0.936	0.949	0.936	0.926	0.898	0.938	0.982	0.955	0.963	0.859	0.92	0.924	0.994		0.978	0.995	0.923	0.956	0.938	0.933	1.005	0.985	1.033	0.933	1.019	0.918	0.942	0.937		0.994	1.006	0.961	0.951	0.993	0.979	0.965	0.995	0.969	1	0.972
	0.937	0.997	0.937	0.986	0.924	0.856	0.855	0.946	0.955	0.93	0.947	0.856	0.927	0.942	1.003		0.947	0.982	0.923	0.963	1.008	0.919	0.924	0.962	0.998	0.953	1.058	0.887	0.935	0.969		0.996	0.98	1.007	0.932	0.967	0.953	0.984	0.98	1.024	0.987	0.958
	0.951	0.999	0.938	0.974	0.921	0.896	0.916	0.931	0.953	0.992	0.93	0.855	0.873	0.925	0.974		0.99	0.945	0.894	0.928	0.996	0.928	0.918	0.943	0.962	0.981	1.064	0.865	0.91	0.95		0.979	0.991	1.032	0.938	0.956	0.963	0.993	0.983	0.991	0.953	0.973
8h	0.93	0.969	0.929	0.962	0.93	0.922	0.861	0.942	0.928	0.957	0.898	0.826	0.813	0.914	0.98	8h	1.026	0.995	0.89	0.931	0.984	0.954	0.939	0.951	0.987	0.952	1.058	0.883	0.924	0.963	8h	0.96	0.97	1.021	0.917	0.959	0.937	0.975	1.052	1.008	0.952	0.969
	0.936	0.981	0.943	0.999	0.941	0.909	0.925	0.923	0.949	0.961	0.902	0.798	0.821	0.857	0.951		0.983	0.969	0.905	0.955	0.957	0.909	0.954	0.95	0.991	0.957	1.042	0.888	0.923	0.952		0.967	0.956	0.966	0.907	0.95	0.972	0.959	0.973	0.984	0.942	1.014
	0.838	0.954	0.918	1.011	0.927	0.906	0.867	0.926	0.882	0.938	0.856	0.791	0.842	0.847	0.97		0.973	0.968	0.902	0.931	0.937	0.91	0.892	0.937	1.013	0.934	1.055	0.87	0.933	0.951		0.96	0.971	1.026	0.891	0.967	0.961	0.964	0.97	1.003	0.999	0.996
	0.859	0.972	0.915	1.007	0.911	0.844	0.856	0.916	0.893	0.912	0.864	0.824	0.878	0.85	0.971		0.97	0.952	0.911	0.925	0.965	0.945	0.935	0.956	1.05	0.932	1.037	0.914	0.893	0.91		0.941	1.008	0.99	0.92	0.934	0.897	0.981	0.99	0.999	0.974	0.99
	0.847	0.964	0.871	0.979	0.896	0.842	0.856	0.924	0.911	0.921	0.841	0.788	0.917	0.862	0.972		0.972	0.953	0.911	0.936	0.925	0.971	0.926	0.965	0.978	0.95	1.043	0.89	0.911	0.951		0.925	0.938	0.992	0.871	0.904	0.864	0.976	0.965	0.989	0.947	0.961
	0.79	0.962	0.869	0.976	0.938	0.823	0.836	0.88	0.956	0.868	0.825	0.797	0.893	0.888	0.956		1.058	1.011	0.906	0.952	0.928	0.918	0.875	0.924	0.96	0.943	1.036	0.878	0.93	0.961		0.923	0.956	1.025	0.872	0.898	0.82	0.961	0.884	0.969	0.962	0.979
	0.839	0.948	0.813	0.989	0.886	0.812	0.842	0.829	0.934	0.858	0.855	0.795	0.899	0.879	0.932		0.968	0.954	0.92	0.941	0.887	0.966	0.925	0.995	1.058	0.938	1.072	0.902	0.909	0.966		0.88	0.897	1.023	0.857	0.914	0.859	0.95	0.96	0.981	0.984	0.978
	0.839	0.921	0.843	0.949	0.909	0.876	0.918	0.827	0.911	0.877	0.829	0.781	0.845	0.9	0.894		0.958	0.964	0.919	0.953	0.878	0.91	0.816	0.879	1.011	0.939	1.069	0.909	0.925	0.977		0.874	0.922	0.998	0.844	0.923	0.827	0.945	0.956	1.005	0.937	0.905
	0.872	0.886	0.9	0.935	0.921	0.8	0.914	0.767	0.842	0.851	0.801	0.801	0.838	0.838	0.883		0.969	1.007	0.856	0.93	0.902	0.9	0.922	0.928	1.022	0.955	1.012	0.881	0.928	0.964		0.856	0.914	1.046	0.803	0.9	0.843	0.952	0.975	0.923	0.934	0.898
	0.81	0.886	0.91	0.904	0.879	0.875	0.883	0.824	0.82	0.848	0.809	0.76	0.946	0.841	0.847		0.985	0.979	0.936	0.942	0.942	0.877	0.854	0.894	0.978	0.968	1.022	0.923	0.928	0.97		0.814	0.896	1.001	0.803	0.882	0.859	0.913	0.875	1.042	0.919	0.853
	0.828	0.901	0.837	0.875	0.899	0.819	0.886	0.895	0.862	0.891	0.792	0.784	0.87	0.816	0.823		1.001	0.99	0.913	0.973	0.961	0.942	0.899	0.914	1.015	0.899	1.049	0.905	0.903	0.92		0.858	0.861	0.984	0.787	0.896	0.812	0.907	0.929	1.004	0.95	0.835
	0.83	0.901	0.857	0.835	0.886	0.786	0.835	0.885	0.869	0.874	0.791	0.784	0.867	0.807	0.878		1.02	0.961	0.91	0.946	0.92	0.85	0.906	0.908	0.975	0.931	1.084	0.904	0.933	0.955		0.91	0.852	0.959	0.807	0.869	0.814	0.882	0.947	0.959	0.926	0.838
	0.79	0.885	0.842	0.901	0.903	0.784	0.83	0.879	0.808	0.936	0.788	0.757	0.871	0.835	0.905		0.979	0.942	0.901	0.946	0.919	0.874	0.902	0.857	1.037	0.94	1.048	0.891	0.896	0.979		0.892	0.83	1.001	0.744	0.856	0.808	0.862	0.97	0.971	0.909	0.931
	0.842	0.871	0.855	0.874	0.887	0.866	0.94	0.835	0.816	0.9	0.802	0.782	0.869	0.871	0.926		0.98	0.944	0.876	0.923	0.923	0.912	0.907	0.901	0.975	0.926	0.951	0.896	0.885	0.957		0.838	0.833	0.956	0.731	0.914	0.863	0.879	0.932	1.044	0.934	0.903
	0.858	0.86	0.824	0.869	0.796	0.75	0.73	0.804	0.901	0.907	0.837	0.764	0.85	0.907	0.924		0.975	0.923	0.89	0.949	0.915	0.948	0.956	0.951	1.03	0.935	0.946	0.929	0.889	0.946		0.832	0.809	0.968	0.782	0.828	0.826	0.827	0.932	0.969	0.944	0.891
	0.892	0.834	0.828	0.852	0.903	0.86	0.913	0.876	0.883	0.926	0.821	0.777	0.849	0.907	0.913		0.989	0.949	0.858	0.963	0.959	0.897	0.889	0.879	1.007	0.926	0.953	0.907	0.915	0.94		0.821	0.797	0.897	0.804	0.912	0.824	0.811	0.895	0.976	0.976	0.868
	0.929	0.88	0.844	0.882	0.895	0.888	0.84	0.854	0.833	0.905	0.828	0.777	0.895	0.837	0.86		1.024	0.99	0.848	0.881	0.947	0.933	0.928	1.016	0.973	0.921	1.037	0.904	0.904	0.942		0.838	0.84	0.976	0.797	0.848	0.811	0.845	0.873	0.967	0.903	0.824
	0.89	0.885	0.824	0.913	0.974	0.862	0.956	0.813	0.843	0.887	0.795	0.784	0.901	0.841	0.882		0.96	0.976	0.864	0.975	0.953	0.909	0.921	0.918	1.03	0.935	1.028	0.892	0.914	0.974		0.823	0.905	0.961	0.801	0.824	0.774	0.827	0.858	0.94	0.94	0.839
	0.867	0.863	0.82	0.911	0.948	0.857	0.918	0.831	0.859	0.899	0.8	0.788	0.897	0.851	0.855		0.939	0.937	0.877	0.976	0.981	0.909	0.985	0.983	0.989	0.938	1.049	0.897	0.907	0.974		0.84	0.875	0.895	0.771	0.79	0.815	0.799	0.889	0.974	0.967	0.801
	0.842	0.854	0.835	0.875	0.878	0.876	0.896	0.818	0.843	0.935	0.782	0.795	0.861	0.848	0.854		0.967	0.936	0.849	0.937	0.985	0.888	0.914	0.9	0.937	0.961	0.998	0.898	0.883	0.96		0.82	0.875	0.956	0.763	0.834	0.824	0.8	0.85	0.965	0.88	0.813
	0.821	0.863	0.831	0.844	0.9	0.828	0.916	0.765	0.922	0.957	0.813	0.831	0.875	0.874	0.874		0.951	0.953	0.894	0.967	0.937	0.944	0.931	0.926	1.035	0.92	0.947	0.872	0.887	0.973		0.781	0.848	1.023	0.822	0.875	0.778	0.812	0.858	1.022	0.976	0.792
	0.833	0.837	0.823	0.875	0.867	0.816	0.889	0.78	0.924	0.911	0.804	0.807	0.88	0.851	0.916		0.959	0.925	0.868	0.931	0.92	0.929	0.913	0.892	0.927	0.926	0.941	0.914	0.915	0.939		0.805	0.861	1.001	0.7	0.881	0.791	0.825	0.864	1.042	0.94	0.778
	0.841	0.824	0.784	0.884	0.855	0.835	0.889	0.774	0.844	0.944	0.795	0.822	0.885	0.823	0.876		0.96	0.945	0.865	0.953	0.874	0.966	0.917	0.967	0.974	0.916	0.958	0.867	0.951	0.953		0.867	0.828	0.972	0.722	0.852	0.784	0.764	0.835	1.035	0.959	0.788
	0.824	0.854	0.784	0.891	0.9	0.892	0.883	0.846	0.834	0.91	0.808	0.84	0.856	0.807	0.851		0.939	0.916	0.844	0.937	0.951	0.89	0.869	0.911	0.981	0.925	0.94	0.888	0.91	0.928		0.904	0.848	0.966	0.76	0.872	0.771	0.794	0.856	1.05	0.939	0.798
	0.832	0.846	0.79	0.823	0.909	0.868	0.891	0.831	0.824	0.945	0.815	0.833	0.848	0.827	0.884		0.975	0.929	0.843	0.953	0.991	0.864	0.915	0.924	0.962	0.905	0.889	0.917	0.914	0.927		0.891	0.821	0.954	0.68	0.882	0.793	0.791	0.842	1.044	0.976	0.795
	0.809	0.911	0.931	0.849	0.831	0.804	0.825	0.825	0.89	0.927	0.814	0.837	0.843	0.845	0.854		0.963	0.989	0.832	0.93	0.981	0.999	0.998	1.015	0.907	0.952	0.9	0.867	0.941	0.929		0.901	0.791	1.081	0.705	0.802	0.823	0.815	0.847	1.071	0.977	0.797
	0.834	0.869	0.8	0.867	0.911	0.882	0.909	0.797	0.88	0.915	0.797	0.826	0.841	0.889	0.832		0.964	0.918	0.894	0.926	0.964	0.887	0.853	0.912	0.977	0.925	0.936	0.88	0.877	0.95		0.895	0.85	1.013	0.693	0.867	0.833	0.83	0.88	1.034	0.909	0.804
	0.877	0.896	0.819	0.919	0.811	0.807	0.804	0.801	0.845	0.882	0.81	0.824	0.925	0.879	0.852		0.961	0.951	0.892	0.949	1.003	0.988	0.996	0.958	0.981	0.932	0.959	0.876	0.9	0.962		0.903	0.812	1.016	0.701	0.787	0.886	0.839	0.854	1.042	0.969	0.821
	0.865	0.862	0.759	0.94	0.852	0.884	0.858	0.85	0.84	0.903	0.79	0.823	0.902	0.867	0.824		1.006	0.924	0.882	0.983	0.939	0.961	0.928	0.903	0.983	0.928	0.965	0.894	0.892	0.962		0.892	0.823	0.95	0.69	0.835	0.902	0.833	0.848	0.993	0.928	0.805
	0.9	0.88	0.817	0.892	0.996	0.927	0.953	0.861	0.815	0.871	0.799	0.845	0.861	0.873	0.806		0.979	0.985	0.897	0.957	0.961	0.904	0.881	0.955	1.008	0.91	0.996	0.926	0.922	0.935		0.961	0.908	0.968	0.723	0.897	0.868	0.809	0.842	1.002	0.921	0.829
	0.851	0.867	0.812	0.886	0.863	0.91	0.824	0.85	0.828	0.915	0.791	0.867	0.889	0.899	0.9		0.98	0.922	0.845	0.942	0.945	0.954	0.955	1.009	0.984	0.947	1.028	0.886	0.928	0.936		0.895	0.914	0.929	0.75	0.866	0.811	0.831	0.909	1.015	0.984	0.905
	0.849	0.888	0.842	0.9	0.885	0.873	0.783	0.871	0.844	0.915	0.786	0.797	0.892	0.875	0.924		0.978	0.919	0.862	0.927	0.929	0.935	0.95	0.976	0.998	0.909	0.961	0.863	0.916	0.989		0.91	0.918	0.904	0.85	0.85	0.827	0.804	0.914	1.031	0.999	0.933
	0.847	0.915	0.838	0.934	0.892	0.88	0.953	0.843	0.874	0.867	0.777	0.932	0.892	0.858	0.849		0.984	0.981	0.929	0.917	0.956	0.911	0.92	0.904	1.003	0.896	0.931	0.935	0.927	0.962		0.955	0.904	0.981	0.785	0.907	0.849	0.908	0.938	1.023	0.976	0.93
	0.874	0.9	0.828	0.943	0.833	0.85	0.869	0.917	0.901	1.053	0.837	0.837	0.934	0.872	0.831		0.939	0.936	0.856	0.96	0.926	0.882	0.917	0.961	1.006	1.082	0.94	0.937	0.885	0.941		0.946	0.878	0.969	0.763	0.879	0.825	0.917	0.992	1.044	0.971	0.91
	0.867	0.904	0.821	0.934	0.955	0.888	0.927	0.933	0.853	0.904	0.8	0.826	0.942	0.913	0.808		0.966	0.939	0.884	0.965	0.929	0.95	0.896	0.971	1.039	0.95	1.025	0.89	0.931	0.968		0.987	0.903	0.981	0.772	0.862	0.814	0.827	0.986	1.088	0.984	0.855
	0.926	0.894	0.92	0.902	0.838	0.915	0.864	0.91	0.912	0.881	0.773	0.79	0.953	0.894	0.884		0.961	0.963	0.87	0.946	0.944	0.935	0.942	1.008	1.007	0.944	0.968	0.906	0.858	0.996		0.918	0.859	0.956	0.865	0.871	0.827	0.831	0.997	1.022	0.955	0.86
	0.932	0.841	0.902	0.978	0.962	0.956	0.92	0.913	0.927	0.855	0.791	0.798	0.992	0.881	0.965		0.954	0.957	0.913	0.945	0.947	0.957	0.945	0.931	0.984	0.919	1.005	0.9	0.913	0.956		0.919	0.876	0.928	0.833	0.886	0.895	0.825	0.966	1.074	1.005	0.948
	0.939	0.884	0.909	0.981	0.868	0.829	0.776	0.917	0.878	0.87	0.81	0.786	0.957	0.887	0.932		0.992	0.956	0.916	0.947	1.01	0.955	1.002	0.945	0.989	0.911	1.016	0.872	0.92	0.967		0.917	0.881	0.998	0.813	0.854	0.912	0.858	0.952	1.013	0.984	0.953
	0.862	0.927	0.893	0.958	0.899	0.923	0.828	0.961	0.862	0.927	0.907	0.802	0.951	0.921	0.937		1.002	0.978	0.887	0.945	0.985	0.983	0.906	0.934	0.96	0.938	1.012	0.889	0.921	0.961		0.898	0.909	1.013	0.794	0.894	0.932	0.911	0.973	1.073	0.97	0.933
	0.895	0.919	0.848	0.972	0.907	0.941	0.865	0.905	0.844	0.981	0.875	0.844	0.976	0.966	0.912		0.942	0.959	0.915	0.957	0.97	0.896	0.916	0.927	0.991	0.918	1.003	0.859	0.923	0.954		0.84	0.942	1.003	0.721	0.922	0.911	0.883	0.978	1.044	0.981	0.901
20h	0.939	0.918	0.868	0.968	0.93	0.912	0.892	0.937	0.946	0.929	0.879	0.828	0.961	0.914	0.921	20h	1.024	0.978	0.889	0.972	0.968	0.893	0.901	0.916	1.021	0.912	0.965	0.939	0.879	0.959	20h	0.865	0.945	1.019	0.785	0.947	0.899	0.917	1.005	1.026	0.973	0.899
	0.919	0.904	0.921	0.975	0.928	0.936	0.886	0.973	0.93	0.94	0.863	0.813	0.984	0.946	0.939		0.989	0.964	0.89	0.956	1.002	0.924	0.966	0.97	1.037	0.932	1.005	0.895	0.902	0.945		0.896	0.928	0.979	0.877	0.914	0.853	0.903	0.996	1.051	1.023	0.882
	0.952	0.923	0.942	0.946	0.977	0.997	0.889	0.932	0.945	0.959	0.955	0.791	0.976	0.929	0.938		0.998	0.977	0.891	0.93	0.959	0.93	0.971	0.999	1.013	0.918	1.005	0.875	0.891	0.977		0.876	0.921	1.027	0.864	0.904	0.885	0.937	0.971	1.01	1.015	0.928
	0.948	0.981	0.978	0.945	0.915	0.969	0.94	0.948	0.959	0.935	0.935	0.885	0.937	0.948	0.971		0.955	1.013	0.925	0.969	0.944	0.932	0.965	0.949	0.988	0.972	0.998	0.899	0.942	0.998		0.943	0.961	1.005	0.868	0.862	0.779	0.962	0.949	1.052	0.976	0.97
	0.982	0.981	0.979	0.952	0.922	0.966	0.842	0.95	0.952	0.889	0.926	0.841	0.968	0.942	0.991		0.975	0.933	0.898	0.969	0.942	0.975	0.963	0.976	0.992	0.926	0.948	0.88	0.908	0.947		0.962	0.986	1.025	0.877	0.9	0.837	0.912	0.969	1.028	0.96	0.954
	0.952	0.999	0.956	0.996	0.943	0.974	0.882	0.97	0.986	0.924	0.93	0.822	0.99	0.957	0.978		1	0.941	0.925	0.952	0.994	0.911	0.954	0.938	0.992	0.965	0.954	0.914	0.948	0.966		1	1.01	1.046	0.882	0.926	0.824	0.966	0.992	1.039	0.979	0.941
	0.951	1.013	0.974	1.003	0.962	0.977	0.945	0.98	0.976	0.96	0.962	0.921	0.961	0.951	0.989		0.963	0.976	0.926	0.976	0.908	0.889	0.903	0.936	1.022	0.938	1.024	0.925	0.909	1.017		0.979	0.993	1.041	0.9	0.928	0.875	0.952	0.995	1.049	0.982	1.015
	0.981	0.99	0.964	0.971	1.014	1.055	1.015	0.923	0.971	0.925	0.972	0.926	1.008	0.964	1.012		0.961	0.956	0.915	0.967	0.994	0.901	0.907	0.944	1.038	0.922	0.955	0.916	0.895	1.014		1.002	0.973	1.028	0.92	0.944	0.911	0.972	0.999	1.065	1.019	0.989
	0.978	0.98	0.977	1.044	0.964	0.962	0.917	0.968	0.965	0.933	0.995	0.945	0.984	0.969	1.02		1.016	0.967	0.903	1.002	1.005	0.944	0.999	1.001	1.032	0.95	0.984	0.931	0.908	0.961		1	0.988	1.065	0.887	0.931	0.939	0.973	1.035	1.061	1.045	0.952
	0.993	0.994	0.986	0.999	0.964	0.989	0.911	0.958	0.974	0.939	0.979	0.933	0.955	0.952	0.987		0.986	0.929	0.925	0.972	0.976	0.902	0.934	0.932	1.039	0.936	0.998	0.942	0.923	0.959		0.999	0.982	1.06	0.914	0.931	0.903	0.974	1.016	1.025	1.001	0.982
	0.984	1.007	0.994	1.02	0.964	1.008	0.942	0.966	0.971	0.973	0.985	0.949	0.982	0.965	0.981		1.013	0.978	0.928	0.968	0.949	0.955	0.947	0.945	1.002	0.932	1.052	0.926	0.943	0.976		1.007	0.981	1.053	0.92	0.947	0.915	0.977	1.006	1.024	1.042	0.985
	1.003	1.021	0.97	1.011	0.927	0.986	0.919	0.985	0.995	0.943	0.969	0.952	1	0.936	1.005		0.992	0.986	0.926	0.979	0.958	0.939	0.934	0.959	1.083	0.965	0.976	0.901	0.939	1.002		1.016	0.97	1.024	0.906	0.959	0.963	0.965	0.977	1.08	1	0.953
	0.994	1.017	0.999	1.017	0.962	0.986	0.954	0.967	0.968	0.932	0.995	0.955	0.996	0.954	1.017		1.006	0.99	0.936	0.969	0.981	0.892	0.903	0.902	1.027	0.924	1.016	0.912	0.899	0.954		0.997	1.002	1.009	0.917	0.966	0.971	0.969	0.992	1.083	1.039	0.982
	0.969	0.997	0.997	1.066	0.968	1.012	0.952	0.973	0.976	0.948	0.984	0.928	1.011	0.961	1.036		1.018	1.005	0.91	0.952	0.954	0.939	0.944	0.931	1.066	0.951	0.978	0.889	0.909	0.954		1.032	1.01	1.044	0.93	0.97	0.958	0.966	0.901	1.032	1.035	1.023
	0.971	0.991	0.978	1.034	0.927	0.955	0.94	0.959	0.979	0.945	0.97	0.923	0.983	0.96	0.997		1.037	0.911	0.938	0.994	0.955	0.933	0.934	0.973	1.044	0.931	1.031	0.911	0.909	0.975		1	0.996	1.032	0.923	0.92	0.943	0.985	0.967	1.005	1.064	0.992
	0.962	0.951	0.977	1.028	0.945	0.998	0.937	0.988	0.967	0.978	0.995	0.96	0.978	0.954	0.997		0.988	0.993	0.919	0.995	0.985	0.88	0.889	0.914	1.149	0.926	1.025	0.889	0.925	0.945		0.998	1	0.999	0.956	0.96	0.939	0.994	1.002	1.087	1.015	0.99
	0.963	0.999	0.973	1.03	0.926	1.006	0.996	0.979	1.009	0.95	0.987	0.999	0.983	0.926	0.998		0.977	0.993	0.924	0.979	0.972	0.973	0.932	0.96	1	0.951	1.02	0.944	0.972	0.955		1.01	0.992	1.035	0.946	0.99	0.991	0.959	0.986	1.038	1.011	0.991
	0.953	0.98	0.95	1.035	0.956	1.002	0.999	0.982	0.97	0.95	1.002	0.978	1.015	0.948	1.018		0.982	0.997	0.923	0.961	0.945	0.886	0.93	0.951	1.015	0.927	1.017	0.926	0.945	0.936		1.005	0.986	1.028	0.936	0.988	0.957	0.991	1.028	1.043	1.017	0.996
	0.947	0.977	0.917	1.052	0.96	1.006	0.959	0.994	0.951	0.973	0.994	0.984	0.988	0.949	1.011		0.949	0.96	0.933	0.961	0.977	0.94	0.954	0.96	1.052	0.94	1.026	0.951	0.946	0.947		0.976	0.992	1.017	0.958	0.951	0.921	1.009	1.032	1.032	1.027	1.016
	0.954	0.947	0.93	1.013	0.904	0.966	0.96	0.986	0.989	0.962	0.992	0.968	0.987	0.957	0.988		0.918	0.946	0.927	0.975	1.002	0.955	0.95	0.972	1.02	0.929	1.016	0.903	0.939	0.947		1.017	0.987	1.021	0.964	0.913	0.944	0.981	1.004	1.08	1.061	0.979
	0.937	0.97	0.934	1.045	0.868	0.955	0.937	0.941	0.957	0.956	1.005	0.985	1.011	0.955	1.057		0.967	0.979	0.911	0.996	0.962	0.938	0.916	0.968	1.013	0.952	1.027	0.914	0.937	0.961		1.005	1.014	1.074	0.901	0.94	0.922	0.995	1.034	1.026	1.049	1.005
	0.912	1	0.891	1.009	0.84	0.987	0.945	0.919	0.919	0.957	0.977	1.017	0.997	0.947	1.015		0.972	0.941	0.942	1.008	1.014	0.959	0.932	0.954	1.019	0.996	1.029	0.922	0.958	0.942		1.04	1	1.027	0.895	0.963	0.896	1.007	0.998	1.038	0.999	1.051
	0.956	0.969	0.926	1.019	0.931	0.978	0.976	0.995	0.93	0.941	1.001	0.962	1.015	0.907	0.994		1.004	0.99	0.91	0.998	0.951	0.95	0.953	0.946	1.028	0.95	0.935	0.921	0.912	0.98		1.021	0.967	1.003	0.948	0.958	0.853	0.977	1.069	1.016	1.012	1.005
	0.941	0.979	0.881	1.026	0.928	0.974	0.939	0.97	0.952	0.926	0.952	0.947	1.079	0.928	0.996		0.963	0.985	0.886	0.969	0.994	0.938	0.953	0.934	1.066	0.968	0.947	0.873	0.957	0.951		0.992	0.946	0.99	0.875	0.899	0.89	0.993	0.995	1.047	1.019	1.014
	0.955	0.942	0.816	0.968	0.939	0.974	0.921	0.933	0.945	0.935	0.981	0.985	1.024	0.923	0.97		0.951	0.94	0.9	0.967	1.008	0.939	0.919	0.951	0.967	0.936	1.013	0.908	0.915	0.942		1.012	0.973	0.995	0.917	0.923	0.923	0.961	1.005	1.063	0.982	1.022
	0.95	0.943	0.875	0.968	0.906	0.965	0.926	0.945	0.94	0.889	0.978	0.985	1.002	0.953	0.971		0.964	0.949	0.903	0.965	1.043	0.962	0.943	0.987	1.023	0.911	0.991	0.943	0.921	0.973		1.019	0.981	0.969	0.898	0.93	0.953	0.937	0.932	1.047	0.976	1.032
	0.953	0.944	0.824	0.992	0.901	0.99	0.895	0.963	0.897	0.902	0.993	0.979	0.97	0.92	0.981		0.957	1.027	0.921	0.966	0.989	0.949	0.953	0.991	1.05	0.945	1.015	0.912	0.898	0.966		0.976	0.987	0.996	0.918	0.951	0.932	0.984	0.958	0.984	1.02	1.041
	0.897	0.935	0.83	1.024	0.872	0.899	0.883	0.941	0.93	0.894	0.991	0.925	0.968	0.941	0.956		1.008	0.959	0.904	1.017	0.939	0.958	0.948	0.978	0.969	0.95	1.019	0.892	0.917	0.975		0.972	0.954	0.934	0.9	0.907	0.961	0.967	0.93	0.992	0.954	1.047
	0.884	0.986	0.82	0.995	0.837	0.906	0.882	0.94	0.922	0.87	0.998	0.948	1.019	0.9	0.972		0.939	0.989	0.889	0.968	1.005	0.962	0.931	0.95	0.995	0.946	1.035	0.938	0.946	0.932		0.968	0.934	0.987	0.928	0.906	0.948	0.928	0.852	1.01	0.946	0.994
	0.831	0.925	0.833	0.955	0.946	0.945	0.877	0.937	0.913	0.875	0.952	0.956	0.973	0.926	0.951		0.916	0.956	0.928	1.043	0.993	0.936	0.906	0.926	0.992	0.955	0.991	0.917	0.929	0.968		0.989	0.938	0.94	0.887	0.921	0.939	0.95	0.904	1.003	0.98	1.001
	0.854	0.984	0.814	0.972	0.791	0.84	0.837	0.905	0.874	0.883	0.942	0.965	0.998	0.907	0.93		0.872	0.983	0.913	0.968	0.966	0.989	0.954	0.958	1.044	0.931	0.989	0.937	0.902	0.941		0.988	0.926	0.961	0.925	0.878	0.854	0.982	0.845	0.939	0.962	1.023
	0.864	0.958	0.812	0.925	0.939	0.931	0.929	0.917	0.871	0.892	0.965	0.937	0.978	0.904	0.937		0.961	1.007	0.91	0.934	0.991	0.924	0.905	0.933	1.002	0.94	1.041	0.919	0.941	0.993		1.036	0.966	0.942	0.918	0.937	0.902	0.965	0.833	0.978	0.963	1.017
	0.927	0.953	0.838	0.912	0.895	0.921	0.873	0.899	0.913	0.937	0.985	0.922	0.917	0.913	0.943		0.947	1.016	0.883	0.973	0.998	0.92	0.927	0.946	1.011	0.949	0.988	0.946	0.916	0.982		1.011	0.96	0.893	0.93	0.921	0.932	0.98	0.866	0.906	0.998	0.991
	0.886	0.947	0.847	0.989	0.923	0.91	0.883	0.926	0.949	0.914	0.927	0.93	0.988	0.923	0.953		0.944	0.967	0.883	0.959	0.958	0.962	0.925	1.012	1.03	0.954	0.956	0.901	0.906	0.975		1.02	1.001	0.822	0.929	0.928	0.927	0.967	0.903	0.981	1.015	1.013
	0.929	0.93	0.887	0.911	0.95	0.929	0.911	0.905	0.881	0.928	0.965	0.928	0.915	0.922	0.963		0.981	0.971	0.896	0.938	1.039	0.916	0.908	0.948	1.058	0.956	0.978	0.943	0.899	0.965		1.026	0.972	0.822	0.951	0.964	0.951	0.973	0.857	0.986	0.997	0.976
	0.954	0.938	0.908	0.909	0.941	0.957	0.91	0.909	0.977	0.918	0.985	0.961	0.909	0.955	0.959		0.957	1.001	0.9	0.983	1.024	0.958	0.945	0.982	1.015	0.953	0.946	0.925	0.948	0.95		1	0.986	0.862	0.94	0.95	0.952	0.972	0.887	0.945	1.032	0.989
	0.96	0.974	0.909	0.95	0.913	0.945	0.848	0.938	0.956	0.925	0.938	0.952	1	0.921	1.009		0.979	1.003	0.892	0.989	1.048	0.912	0.937	0.951	1.008	0.945	0.987	0.927	0.948	0.97		1.02	0.982	0.942	0.922	0.93	0.943	0.964	0.924	1.011	0.997	0.999
	0.926	0.935	0.957	0.938	0.888	0.944	0.851	0.932	0.963	0.936	0.972	0.988	0.954	0.936	0.99		0.951	1.04	0.91	0.993	1.017	0.97	0.931	0.985	1.044	0.98	0.945	0.918	0.95	0.997		1.017	0.984	0.992	0.912	0.949	0.945	0.993	0.864	0.949	1.025	0.998
	0.957	0.964	0.915	0.989	0.956	0.961	0.927	0.904	0.944	0.913	1.006	0.978	0.962	0.941	0.968		0.988	0.97	0.916	0.981	0.981	0.886	0.937	0.925	1.064	0.956	0.976	0.92	0.93	0.961		1.015	0.969	0.975	0.918	0.929	0.956	0.994	0.934	0.972	0.991	1.029
	0.927	0.95	0.91	0.943	0.926	0.947	0.861	0.909	0.933	0.907	0.967	0.997	1.043	0.949	1.01		1.043	1.021	0.894	0.968	1.015	0.984	1.01	1.026	1.045	0.955	0.997	0.927	0.964	0.955		1.027	0.981	0.991	0.893	0.9	0.949	0.983	0.939	1.059	1.048	0.96
8h	0.925	0.969	0.904	1.013	0.908	0.91	0.883	0.958	0.96	0.922	0.94	0.971	0.955	0.913	0.988	8h	0.99	0.994	0.913	0.99	0.987	0.923	0.932	0.954	1.033	0.978	1.013	0.949	0.958	0.948	8h	1.001	0.971	0.999	0.887	0.916	0.946	0.966	0.945	1.044	0.979	0.976
	0.944	0.929	0.9	0.946	0.908	0.862	0.87	0.902	0.884	0.933	0.959	0.955	1.019	0.885	0.953		0.935	0.972	0.912	0.996	1.035	0.948	0.944	0.988	1.049	0.961	1.025	0.917	0.943	1.007		1.022	0.948	0.974	0.885	0.916	0.91	0.952	0.967	1.048	0.953	0.952
	0.891	0.945	0.855	0.976	0.904	0.863	0.837	0.874	0.805	0.928	0.896	0.991	1.001	0.881	0.971		1.042	1.003	0.915	1.011	1.033	0.971	0.945	0.954	1.007	0.949	1.064	0.924	0.928	0.999		1.03	0.968	0.992	0.834	0.915	0.959	0.961	0.971	1.011	0.995	0.943
	0.904	0.928	0.827	1.041	0.888	0.889	0.775	0.87	0.819	0.934	0.892	0.968	0.903	0.879	0.924		1.106	1.002	0.889	0.988	1.012	0.975	0.953	0.965	0.998	0.964	1.024	0.931	0.928	0.965		0.981	0.982	0.991	0.846	0.842	0.894	0.959	1.028	1.013	0.95	0.881
	0.864	0.882	0.848	0.919	0.878	0.906	0.813	0.831	0.807	0.935	0.843	0.965	0.916	0.871	0.899		1.015	0.991	0.883	0.982	1.019	0.937	0.917	0.951	1.053	0.939	0.966	0.944	0.94	0.936		0.966	0.924	0.985	0.861	0.886	0.884	0.966	0.99	1.071	1.013	0.927
	0.892	0.951	0.865	0.845	0.788	0.864	0.847	0.768	0.867	0.947	0.973	0.967	0.962	0.924	0.969		1.047	1.004	0.926	1.029	0.984	1.004	0.963	0.974	1.015	0.949	1.017	0.926	0.903	0.953		0.862	0.927	0.959	0.87	0.819	0.899	0.962	0.979	1.01	0.964	0.955
	0.856	0.937	0.892	0.895	0.866	0.884	0.851	0.799	0.836	0.916	0.949	0.962	0.988	0.907	0.949		0.981	1.005	0.915	1	1.018	0.948	0.904	0.922	1.049	0.956	0.986	0.93	0.956	0.996		0.876	0.903	0.936	0.876	0.813	0.865	0.942	0.988	0.996	0.888	0.951
	0.855	0.994	0.893	0.876	0.906	0.81	0.837	0.798	0.814	0.911	0.917	0.892	0.965	0.911	0.969		1.041	0.969	0.928	1.009	0.978	0.939	0.928	0.941	0.994	0.958	1.026	0.938	0.982	0.987		0.866	0.87	0.97	0.83	0.817	0.855	0.957	0.946	0.933	0.891	0.941
	0.833	0.906	0.85	0.816	0.856	0.835	0.792	0.78	0.864	0.873	0.943	0.893	0.899	0.877	0.937		0.938	0.965	0.886	0.965	1.041	1.002	0.962	1.024	0.996	0.972	1.008	0.947	0.954	0.976		0.845	0.844	0.947	0.76	0.822	0.858	0.894	0.886	0.972	0.905	0.909
	0.842	0.889	0.846	0.85	0.902	0.839	0.874	0.754	0.853	0.913	0.933	0.868	0.94	0.868	0.873		1.049	0.993	0.898	0.963	1.001	0.9	0.834	0.912	1.06	0.953	0.915	0.932	0.891	0.933		0.922	0.873	0.932	0.738	0.8	0.839	0.915	0.893	1.046	1.002	0.868
	0.855	0.894	0.838	0.864	0.815	0.804	0.828	0.757	0.83	0.922	0.924	0.926	0.925	0.935	0.882		1.045	1.004	0.913	0.992	0.978	0.989	0.89	1.012	0.968	0.956	0.881	0.901	0.994	0.937		0.934	0.864	0.857	0.729	0.756	0.828	0.896	0.838	0.968	0.941	0.896
	0.841	0.894	0.835	0.837	0.905	0.936	0.857	0.827	0.787	0.842	0.866	0.938	0.89	0.859	0.868		1.009	0.93	0.892	0.998	0.987	0.894	0.868	0.879	0.979	0.936	0.879	0.898	0.98	0.94		0.891	0.857	0.825	0.764	0.792	0.812	0.853	0.9	0.927	0.945	0.818
	0.837	0.904	0.813	0.85	0.959	0.862	0.875	0.817	0.756	0.873	0.895	0.926	0.942	0.879	0.841		0.985	0.956	0.885	0.991	0.987	0.917	0.936	0.911	0.987	0.954	0.909	0.964	0.928	0.955		0.876	0.859	0.815	0.731	0.791	0.812	0.835	0.981	0.927	0.934	0.836
	0.855	0.886	0.823	0.805	0.868	0.818	0.885	0.816	0.789	0.852	0.839	0.9	0.889	0.82	0.84		0.95	0.925	0.883	0.985	0.98	0.949	0.969	1.04	0.89	0.973	0.958	0.922	0.902	0.949		0.882	0.835	0.839	0.702	0.792	0.823	0.822	0.916	0.91	0.96	0.84
	0.875	0.855	0.809	0.893	0.892	0.847	0.896	0.825	0.846	0.841	0.845	0.882	0.957	0.842	0.91		0.953	0.939	0.875	0.982	1.037	0.84	0.93	0.845	1.015	0.931	0.977	0.922	0.943	0.987		0.909	0.832	0.914	0.744	0.798	0.829	0.828	0.941	0.913	0.892	0.819
	0.821	0.856	0.825	0.902	0.856	0.881	0.859	0.822	0.796	0.844	0.849	0.92	0.956	0.876	0.867		1.042	0.968	0.878	1.004	1.039	0.877	0.985	0.944	0.97	0.96	0.983	0.909	0.953	0.923		0.971	0.826	0.904	0.674	0.76	0.864	0.828	0.932	1.012	0.889	0.913
	0.805	0.835	0.858	0.821	0.801	0.833	0.828	0.785	0.837	0.926	0.859	0.959	0.912	0.846	0.861		1.019	0.943	0.885	0.976	0.964	0.9	0.938	0.933	1.02	0.979	0.966	0.973	0.922	0.95		0.927	0.769	0.865	0.659	0.754	0.913	0.881	0.925	0.919	0.854	0.914
	0.81	0.86	0.875	0.873	0.82	0.83	0.857	0.783	0.788	0.919	0.888	0.911	0.952	0.88	0.862		0.994	0.992	0.882	1.015	0.987	0.914	0.899	0.881	1.011	0.979	0.944	0.934	0.925	0.972		0.91	0.829	0.887	0.734	0.782	0.863	0.794	0.88	0.97	0.898	0.893
	0.781	0.84	0.901	0.862	0.854	0.801	0.818	0.728	0.844	0.9	0.923	0.907	0.949	0.92	0.846		0.998	0.932	0.931	0.984	0.972	0.953	0.986	0.994	0.985	0.942	0.939	0.923	0.941	0.944		0.881	0.774	0.83	0.665	0.784	0.886	0.81	0.879	0.926	0.887	0.874
	0.77	0.845	0.903	0.829	0.876	0.845	0.835	0.813	0.783	0.875	0.91	0.857	0.944	0.942	0.881		0.971	0.92	0.877	0.968	0.99	0.966	0.949	0.982	0.985	0.964	0.912	0.897	0.948	0.932		0.895	0.826	0.852	0.679	0.839	0.858	0.81	0.897	0.936	0.953	0.886
	0.794	0.884	0.837	0.849	0.898	0.835	0.844	0.833	0.766	0.859	0.904	0.889	0.864	0.899	0.863		1.03	0.97	0.864	0.96	1.006	0.943	0.942	0.944	0.964	0.963	0.924	0.896	0.96	0.971		0.871	0.809	0.853	0.732	0.793	0.817	0.829	0.846	1.005	0.943	0.832
	0.825	0.918	0.845	0.861	0.897	0.868	0.804	0.819	0.834	0.88	0.898	0.867	0.896	0.889	0.891		0.994	0.949	0.858	1.021	0.97	0.997	0.952	0.971	0.988	0.949	0.885	0.938	0.896	0.964		0.866	0.806	0.807	0.683	0.793	0.811	0.786	0.818	1.003	0.923	0.843
	0.809	0.893	0.821	0.854	0.772	0.809	0.729	0.824	0.837	0.848	0.922	0.832	0.874	0.844	0.855		0.965	0.913	0.877	1.013	1.061	1.002	0.954	0.951	1.003	0.946	0.939	0.916	1.008	0.986		0.835	0.775	0.822	0.676	0.785	0.791	0.788	0.873	0.959	0.898	0.848
	0.845	0.874	0.819	0.841	0.824	0.831	0.834	0.821	0.834	0.897	0.858	0.874	0.88	0.844	0.859		0.953	0.983	0.862	0.946	1.021	0.891	0.875	0.853	1.002	0.959	0.914	0.921	0.94	0.97		0.875	0.767	0.85	0.716	0.78	0.813	0.782	0.843	1.009	0.874	0.862
	0.835	0.857	0.843	0.812	0.886	0.839	0.849	0.88	0.825	0.889	0.845	0.879	0.859	0.843	0.844		0.943	1.003	0.881	0.97	0.994	0.912	0.891	0.923	0.984	0.934	0.939	0.902	0.963	0.935		0.808	0.828	0.803	0.704	0.782	0.788	0.806	0.857	1.075	0.873	0.838
	0.815	0.861	0.834	0.881	0.773	0.813	0.802	0.84	0.814	0.881	0.831	0.915	0.892	0.843	0.869		0.959	0.955	0.858	0.952	0.945	0.932	0.934	0.934	0.976	0.947	0.987	0.961	0.951	0.933		0.805	0.786	0.787	0.661	0.765	0.794	0.877	0.9	1.071	0.92	0.836
	0.863	0.86	0.827	0.924	0.901	0.837	0.854	0.846	0.845	0.904	0.844	0.858	0.868	0.806	0.833		0.998	0.973	0.878	0.958	0.98	0.909	0.888	0.908	1.078	0.947	0.951	0.898	0.904	0.89		0.825	0.819	0.805	0.674	0.792	0.802	0.881	0.863	0.981	0.891	0.834
	0.825	0.91	0.894	0.898	0.881	0.863	0.859	0.857	0.8	0.905	0.844	0.881	0.887	0.834	0.863		0.947	0.921	0.895	0.951	1.072	0.969	0.995	1.001	0.983	0.966	0.966	0.939	0.878	0.942		0.876	0.794	0.81	0.686	0.772	0.81	0.86	0.849	0.971	0.998	0.813
	0.802	0.867	0.885	0.901	0.823	0.864	0.826	0.862	0.789	0.899	0.832	0.942	0.886	0.814	0.842		0.964	0.941	0.917	0.918	1.016	0.949	0.894	0.972	0.953	0.938	0.958	0.946	0.956	0.968		0.92	0.78	0.778	0.675	0.769	0.88	0.9	0.869	1.024	0.996	0.811
	0.833	0.841	0.835	0.898	0.792	0.849	0.794	0.855	0.783	0.936	0.836	0.86	0.893	0.884	0.859		0.975	0.927	0.892	0.928	1.035	0.984	0.954	0.932	1.002	1.071	0.919	0.895	0.923	0.97		0.91	0.772	0.839	0.744	0.786	0.861	0.87	0.807	1.03	1.022	0.816
	0.831	0.837	0.82	0.881	0.828	0.854	0.838	0.863	0.897	0.874	0.833	0.848	0.895	0.819	0.94		0.938	0.899	0.85	0.96	1.019	0.893	0.904	0.874	0.94	0.919	0.925	0.931	0.908	0.953		0.903	0.777	0.874	0.738	0.827	0.88	0.837	0.867	1.013	0.974	0.828
	0.836	0.829	0.832	0.866	0.838	0.853	0.868	0.893	0.884	0.878	0.905	0.867	0.964	0.88	0.967		0.975	0.958	0.848	0.97	0.986	0.985	0.945	0.939	0.957	0.951	0.932	0.876	0.945	0.95		0.879	0.827	0.837	0.793	0.843	0.888	0.816	0.813	1.084	0.955	0.836
	0.849	0.837	0.861	0.843	0.809	0.849	0.862	0.903	0.853	0.908	0.925	0.861	0.959	0.907	0.942		0.933	0.942	0.839	0.981	1.016	0.918	0.903	0.899	0.967	0.928	0.932	0.926	0.899	0.954		0.899	0.855	0.826	0.756	0.808	0.825	0.819	0.825	1.109	0.99	0.822
	0.913	0.842	0.904	0.823	0.837	0.908	0.848	0.839	0.837	0.919	0.957	0.866	0.968	0.883	0.932		1.032	0.967	0.912	0.978	1.101	0.935	0.914	0.914	1.008	0.983	0.955	0.921	0.984	0.954		0.948	0.904	0.849	0.716	0.878	0.844	0.891	0.873	1.104	1.008	0.844
	0.934	0.932	0.896	0.941	0.843	0.957	0.833	0.792	0.822	0.869	0.875	0.937	0.978	0.894	0.942		0.9	0.938	0.875	0.952	1.085	0.967	0.942	0.941	1.001	0.971	0.961	0.941	0.945	0.953		0.952	0.884	0.855	0.724	0.808	0.837	0.905	0.841	1.05	0.992	0.895
	0.899	0.94	0.862	0.973	0.778	0.928	0.794	0.862	0.877	0.931	0.948	0.86	0.947	0.841	0.952		0.97	0.937	0.915	0.949	0.917	1.011	0.924	1.03	1.043	0.997	0.963	0.934	0.874	0.974		0.965	0.925	0.92	0.733	0.898	0.81	0.918	0.975	0.981	0.931	0.939
	0.84	0.889	0.827	0.878	0.843	0.876	0.863	0.853	0.922	0.931	0.964	0.831	0.939	0.89	0.958		0.997	0.975	0.878	0.956	1.058	0.947	0.876	0.942	0.954	0.979	0.988	0.912	0.962	0.955		0.961	0.851	0.933	0.866	0.904	0.859	0.843	0.954	0.984	0.93	1.01
	0.832	0.888	0.828	0.893	0.871	0.888	0.818	0.838	0.906	0.905	0.972	0.903	0.964	0.861	0.937		0.942	0.965	0.924	0.989	0.979	0.977	0.927	0.94	1.008	0.964	1.01	0.932	0.878	0.873		0.909	0.906	1.002	0.814	0.934	0.912	0.872	1	1.072	0.957	0.927
	0.882	0.906	0.74	0.916	0.939	0.903	0.971	0.825	0.862	0.901	0.978	0.929	1.006	0.941	0.95		0.961	0.995	0.892	0.956	1.03	0.936	0.897	0.899	1.005	0.988	1.013	0.919	0.919	0.944		0.978	0.965	0.934	0.809	0.873	0.945	0.886	0.965	1.115	0.956	0.904
	0.924	0.918	0.895	0.951	0.864	0.891	0.913	0.834	0.885	0.9	0.972	0.937	0.971	0.906	0.883		0.948	1.013	0.895	0.955	1.002	1.009	0.977	0.98	1.025	0.949	0.983	0.925	0.905	0.944		0.969	0.917	1.002	0.773	0.953	0.947	0.864	0.953	1.016	0.969	0.938
20h	0.928	0.881	0.921	0.984	0.817	0.923	0.878	0.895	0.864	0.943	0.948	0.91	0.986	0.914	0.95	20h	0.99	0.942	0.844	0.949	0.973	0.957	0.909	0.971	1.037	0.935	1.006	0.912	0.897	0.981	20h	0.985	0.932	1.019	0.78	0.836	0.894	0.862	0.973	0.973	0.935	0.959
	0.903	0.855	0.874	0.993	0.899	0.942	0.848	0.91	0.905	0.934	0.909	0.951	0.907	0.937	0.932		1.002	0.957	0.9	0.964	0.969	0.881	0.927	0.924	0.985	0.942	0.967	0.909	0.917	0.976		0.985	0.971	0.996	0.746	0.858	0.914	0.898	0.926	0.993	0.91	0.953
	0.96	0.902	0.943	0.974	0.97	0.875	0.923	0.935	0.946	0.974	0.976	0.975	0.958	0.948	0.98		1.05	0.974	0.892	0.958	0.96	0.949	0.923	0.954	1.01	0.996	1.004	0.964	0.903	0.933		0.968	0.886	1.014	0.917	0.875	0.92	0.915	0.996	1.014	0.976	0.927
	0.969	0.962	0.892	0.973	0.936	0.934	0.915	0.926	0.969	0.973	0.979	0.958	0.957	0.938	0.978		0.949	0.956	0.91	1.006	0.977	0.99	0.944	0.995	1.063	0.968	0.983	0.935	0.916	0.898		0.926	0.928	1.02	0.913	0.905	0.965	0.971	0.953	1.03	0.951	0.928
	0.955	0.956	0.936	0.956	1.016	0.985	0.992	0.96	0.926	0.92	0.922	0.953	0.947	0.937	0.96		0.995	0.956	0.903	0.983	0.962	0.956	0.937	0.953	1.02	0.961	0.979	0.926	0.914	0.965		0.98	0.908	1.009	0.866	0.884	0.974	0.964	0.972	1.052	1.008	0.973
	0.946	0.999	0.978	0.98	0.923	1.002	0.904	0.907	0.943	0.951	0.931	0.987	0.993	0.964	1.002		0.997	0.978	0.91	0.987	0.95	0.973	0.992	0.98	1.051	0.952	0.997	0.961	0.946	0.959		0.985	0.946	1.066	0.86	0.933	0.941	0.993	0.997	1.064	0.98	0.953
	0.974	0.949	0.98	1.001	0.953	0.954	0.892	0.963	0.955	0.969	0.978	0.977	0.979	0.966	1.001		1.1	0.99	0.92	0.981	0.935	0.899	0.945	0.941	1.022	0.972	0.976	0.958	0.95	0.979		0.999	0.946	1.096	0.934	0.944	0.936	0.987	1.01	1.034	1.011	0.986
	0.97	0.984	0.936	1.025	0.967	0.969	0.911	0.95	0.955	0.944	0.982	0.987	1.03	0.972	1.013		0.994	0.921	0.901	1.027	0.933	0.924	0.949	0.966	1.103	1.011	0.984	0.93	0.928	0.968		1.016	0.967	0.997	0.865	0.935	0.937	0.978	0.96	1.092	1.048	1.01
	0.99	0.986	0.962	1.018	0.926	0.98	0.917	0.932	0.958	0.979	0.976	0.973	0.979	0.971	1.032		1.035	0.925	0.924	1.001	0.949	0.943	0.972	0.967	1.049	0.977	1.002	0.924	0.917	0.934		1.005	0.949	1.013	0.917	0.942	0.96	0.997	0.986	1.062	1.045	1.01
	0.984	0.969	0.947	1.005	0.987	0.975	0.946	0.968	1.015	0.98	0.966	0.981	0.98	0.984	1.01		0.973	0.972	0.92	0.971	0.942	0.902	0.922	0.923	1.011	0.982	0.96	0.953	0.953	0.945		1.039	0.985	1.092	0.874	0.932	0.973	0.983	0.971	1.062	1.034	0.992
	0.994	0.947	0.978	1.015	0.931	0.992	0.923	0.972	0.962	0.98	0.992	0.999	1.028	0.968	1.01		1.029	0.973	0.932	0.968	0.948	0.989	0.981	0.991	0.993	0.967	1	0.931	0.894	0.965		1.012	0.978	1.028	0.923	0.957	0.983	0.991	0.934	1.057	1.021	0.992
	1	1.001	0.941	1.02	0.975	1.012	0.972	0.929	0.984	0.978	0.986	1.012	1.001	0.966	1.016		0.948	0.922	0.915	0.993	0.93	0.941	0.957	0.938	1.063	0.972	1.02	0.935	0.911	0.946		0.993	0.987	0.998	0.934	0.976	0.972	0.996	0.977	1.051	1.022	1.008
	1.012	0.989	0.993	1.038	0.976	0.984	0.948	0.969	0.984	0.984	0.978	0.995	1.017	0.979	1.033		0.997	0.971	0.932	0.983	0.936	0.924	1.008	0.988	1.049	0.981	1.01	0.963	0.927	1.024		1.017	0.983	1.054	0.915	0.944	0.962	0.978	1.004	1.095	1.03	1.007
	1.002	1.004	1.013	1.011	0.981	0.984	0.957	0.982	0.969	0.97	1.019	0.994	0.98	0.96	1.004		0.999	1.003	0.945	0.992	0.967	0.971	1.013	0.988	1.034	0.965	1.008	0.955	0.945	1.001		1.025	0.968	1.024	0.937	0.947	0.978	1.01	0.97	1.069	1.029	1.011
	0.987	0.96	0.986	1.015	0.941	0.969	0.942	0.949	0.985	0.983	0.993	1.003	1.033	0.996	1.021		0.959	0.962	0.929	0.978	0.947	0.935	0.941	0.943	1.048	0.942	0.994	0.943	0.931	0.969		0.982	0.996	1.078	0.959	0.958	0.97	1.01	1.035	1.07	1.066	1.01
	0.987	0.974	0.963	1.004	0.922	1.022	0.956	0.928	0.985	0.996	1.009	1.008	1.051	0.961	1.009		0.986	0.967	0.908	1.008	0.923	0.952	0.972	0.974	1.045	0.982	0.991	0.955	0.935	0.929		1.026	0.976	1.027	0.935	0.966	0.973	0.997	1.022	1.064	1.02	0.99
	0.988	0.988	1.033	1.029	0.909	0.976	0.941	0.957	0.976	0.977	0.996	0.998	1.01	0.974	1.022		1.026	1.052	0.925	0.994	0.972	0.939	0.944	0.974	0.966	0.978	1.017	0.931	0.96	0.924		1.033	1.002	1.04	0.958	0.971	0.993	0.979	0.98	1.099	1.014	1.041
	0.993	0.965	1.01	1.068	0.918	1.002	0.933	0.979	1.012	0.976	0.997	0.999	1.007	0.981	1.018		0.973	0.982	0.937	0.989	0.95	0.95	0.957	0.96	1.025	0.966	1.016	0.931	0.944	0.969		0.989	0.97	1.017	0.937	0.946	0.989	0.989	1.001	1.051	1.029	1.025
	0.965	0.96	0.975	1.026	0.95	0.997	0.944	0.971	0.968	0.97	1	0.982	0.982	0.929	1.007		0.946	0.976	0.907	1.011	1.006	0.981	0.955	1.014	1.047	0.975	1.022	0.941	0.9	0.949		1.027	1.003	1.045	0.923	0.968	0.984	1.001	0.98	1.058	1.02	1.009
	0.954	1.01	1.012	1.025	0.897	0.974	0.908	0.983	0.967	0.956	1.006	1.035	1.001	0.967	1.046		1.012	1.006	0.923	1.005	1	1.009	0.991	0.999	1.036	0.966	1.003	0.938	0.948	0.958		1.003	0.98	1.068	0.95	0.944	0.955	1.005	1.046	1.055	1.027	1.035
	0.979	0.973	0.965	1.043	0.852	0.988	0.911	0.943	0.922	0.983	1.031	1.008	1.051	0.98	1.011		0.917	0.954	0.895	0.995	0.996	0.956	0.947	0.969	1.02	1.026	1.024	0.937	0.933	0.951		1.011	0.982	1.017	0.914	0.952	0.942	0.992	1.038	1.082	1.041	1.056
	1.007	0.986	0.96	1.035	0.883	1.062	0.94	0.94	0.928	0.99	1.047	1.015	1.032	0.897	0.999		0.99	0.984	0.934	0.993	0.994	0.969	0.957	0.958	1.056	0.977	0.996	0.936	0.938	0.944		1.038	1.035	1.016	0.929	0.953	1.003	1.021	1.043	1.134	1.019	1.014
	0.967	0.973	0.983	1.04	0.875	0.946	0.84	0.941	0.957	0.97	1.031	1	1.047	0.964	1.027		1.014	1.015	0.922	0.981	0.983	1.004	0.978	1.015	0.967	0.962	1.036	0.912	0.983	0.967		1.033	1.01	1.026	0.89	0.94	0.992	1.019	1	1.093	1.085	1.019
	0.946	0.946	0.942	1.01	0.887	0.985	0.873	0.931	0.908	0.938	1.014	1	1.068	0.954	1.041		0.966	0.928	0.924	1.009	0.989	0.956	0.951	0.996	0.939	0.981	1.036	0.918	0.929	0.963		0.995	0.998	1.002	0.938	0.938	0.982	0.983	1.001	1.081	1.078	1.063
	0.925	1.022	0.943	0.992	0.966	0.997	0.884	0.96	0.972	0.883	1.028	1.008	1.001	0.944	1.022		0.955	0.922	0.887	0.992	0.97	0.968	0.961	0.966	1	0.989	1.023	0.899	0.933	1.022		1.076	1.023	1.025	0.925	0.937	0.971	1.006	1.004	1.052	1.02	1.044
	0.935	0.976	0.934	1.03	0.889	0.985	0.855	0.949	0.933	0.917	0.996	0.971	1.027	0.932	1.011		0.983	0.978	0.906	0.979	0.949	0.994	0.963	0.987	0.998	1.019	1.041	0.945	0.941	1		1.093	0.987	0.968	0.911	0.915	0.99	1.015	0.96	1.054	1.021	1.053
	0.953	0.965	0.889	0.978	0.891	1.009	0.902	0.889	0.921	0.934	0.976	0.994	1.022	0.946	0.997		0.961	0.99	0.907	0.999	1.018	1.012	0.95	0.961	0.99	0.968	1.031	0.958	0.926	1.003		1.014	1.015	1.037	0.916	0.943	0.998	1	0.939	1.039	0.985	1.029
	0.881	1.004	0.877	0.982	0.981	1.007	0.971	0.957	0.863	0.937	0.954	0.987	0.953	0.927	1.027		0.925	0.969	0.847	1.006	0.984	0.964	0.948	0.936	0.945	1.033	1.023	0.912	0.937	0.931		0.984	0.999	0.99	0.899	0.95	0.993	0.991	0.965	1.014	0.92	1.041
	0.893	0.95	0.88	1.047	0.845	0.947	0.876	0.882	0.895	0.91	0.99	0.979	1.002	0.929	0.983		0.96	1.013	0.884	0.99	1.017	1.011	1.041	0.996	0.982	0.996	1.014	0.948	0.943	0.911		0.981	0.981	0.944	0.933	0.891	0.964	0.985	0.898	0.941	0.924	1.009
	0.876	0.958	0.853	1.018	0.867	0.958	0.879	0.916	0.85	0.909	0.908	0.984	0.947	0.948	0.931		1.003	0.975	0.893	1.021	0.96	0.973	0.927	0.96	0.978	0.978	0.994	0.924	0.922	0.909		0.994	1.009	0.907	0.909	0.919	0.966	0.965	0.865	0.962	0.906	1.03
	0.967	0.911	0.956	0.924	0.903	0.94	0.872	0.904	0.862	0.887	0.944	0.974	0.934	0.933	0.963		1.001	0.981	0.919	1.002	0.98	0.922	0.922	0.958	1.012	0.989	1.021	0.921	0.959	1.042		1.019	0.983	0.901	0.94	0.923	0.956	0.99	0.92	0.953	0.993	0.989
	0.951	0.923	0.903	0.928	0.886	0.903	0.829	0.905	0.857	0.873	0.894	0.965	0.964	0.946	0.984		0.967	0.979	0.869	1.047	1.017	0.95	0.952	1.032	0.982	0.983	1	0.959	0.931	0.957		1.06	0.992	0.844	0.918	0.942	0.953	0.969	0.961	0.986	0.957	0.951
	0.925	0.959	0.922	0.997	0.937	0.94	0.911	0.882	0.897	0.92	0.94	0.991	0.95	0.938	0.98		0.979	1.005	0.926	0.991	1.067	0.954	0.933	0.978	1.011	0.957	0.983	0.961	0.963	0.965		1.011	1.004	0.859	0.954	0.95	0.994	0.985	0.96	1.025	0.954	1.052
	0.964	0.922	0.924	0.947	0.927	0.943	0.877	0.921	0.923	0.913	0.877	1.013	0.974	0.954	0.964		0.891	0.931	0.897	0.996	1.003	0.973	0.965	0.997	0.963	1.008	1.045	0.957	0.962	0.983		0.96	0.96	0.834	0.94	0.958	0.978	1.028	0.929	0.99	1.043	1.017
	0.968	0.982	0.953	0.97	0.888	0.918	0.819	0.885	0.907	0.919	0.883	0.976	0.965	0.958	0.967		0.956	0.978	0.913	0.945	0.995	1.046	0.994	0.998	1.02	1.013	1.009	0.963	0.979	0.973		1.034	1.003	0.838	0.953	0.935	0.964	0.985	0.899	0.937	0.977	0.972
	0.97	0.972	0.934	0.95	0.921	0.984	0.866	0.935	0.943	0.918	0.853	0.974	0.988	0.951	0.93		0.954	0.953	0.914	0.986	1.115	0.935	0.93	0.952	1.088	0.961	0.999	0.971	0.926	0.972		1.043	0.988	0.872	0.949	0.949	0.986	1.01	0.943	0.877	0.944	0.959
	0.979	0.99	0.926	0.955	0.918	0.94	0.855	0.9	0.935	0.9	0.921	0.983	0.996	0.956	0.971		1.026	1.009	0.925	0.971	1.011	0.942	0.954	0.974	1.035	1.03	0.991	0.994	0.943	0.984		1.01	0.99	0.931	0.933	0.929	0.98	1.004	0.967	0.965	0.984	1.01
	0.942	0.974	0.936	0.983	0.904	0.93	0.851	0.909	0.937	0.921	0.982	0.99	0.984	0.949	0.959		0.971	1.035	0.905	0.989	1.104	0.96	0.949	0.988	1.016	0.953	1.011	0.97	0.924	0.966		1.021	0.996	0.947	0.928	0.904	0.971	1.001	0.928	0.946	0.975	1.004
	0.912	0.989	0.896	1.003	0.931	0.965	0.856	0.913	0.942	0.92	0.99	0.929	1.002	0.96	0.955		0.998	0.911	0.897	0.968	0.995	0.937	0.952	0.98	1.032	0.958	0.944	0.956	0.926	1.039		1.016	0.989	1.038	0.931	0.888	0.964	0.994	0.982	1.014	1.024	0.984
	0.894	0.964	0.955	1.01	0.917	0.958	0.886	0.904	0.955	0.929	0.996	0.917	0.987	0.948	0.967		0.983	1.012	0.906	1.014	1.047	0.95	0.969	0.961	1.095	1	1.005	0.94	0.947	0.971		1.001	0.96	1.01	0.921	0.877	0.941	0.994	0.981	0.977	1.035	1.008
8h	0.93	0.955	0.93	1.062	0.867	0.982	0.798	0.866	0.952	0.931	1.027	0.935	1.031	0.934	0.929	8h	0.994	0.992	0.898	0.99	1.052	1.038	1.006	1.028	1.064	0.998	1.012	0.972	0.914	0.992	8h	0.998	0.96	0.954	0.931	0.878	1.005	0.97	0.944	1.033	1.074	1.034
	0.892	0.918	0.903	0.991	0.928	1.02	0.932	0.863	0.932	0.91	0.991	0.921	1.046	0.894	0.921		0.987	0.973	0.913	1.017	1.077	0.938	0.94	0.941	1	1.003	1.017	0.974	0.889	1.049		0.991	0.902	0.97	0.94	0.845	0.951	0.99	1.017	1.029	0.991	0.987
	0.91	0.952	0.876	0.965	0.854	0.894	0.841	0.775	0.912	0.872	0.99	0.877	0.975	0.928	0.906		0.971	0.955	0.895	1.022	1.048	1.043	1.011	1.069	1.043	0.99	1.007	0.948	0.984	1.019		0.963	0.926	0.94	0.894	0.803	0.963	0.982	1.007	1.01	1.008	1.003
	0.891	0.945	0.861	0.902	0.927	0.892	0.872	0.788	0.855	0.886	0.949	0.922	0.982	0.951	0.949		0.94	0.973	0.9	1.023	1.019	0.983	0.923	0.953	1.045	1.02	1.027	0.97	0.963	0.981		0.975	0.925	0.97	0.888	0.838	0.977	0.959	1.014	1.032	1.018	0.989
	0.865	0.953	0.872	0.892	0.932	0.875	0.88	0.78	0.858	0.921	0.938	0.913	0.95	0.915	0.962		0.967	0.95	0.918	1.046	0.965	0.974	0.964	0.905	1.047	0.988	1.036	0.989	0.952	0.938		0.959	0.921	0.943	0.867	0.816	0.97	0.946	0.992	1.027	0.949	0.942
	0.82	0.947	0.814	0.918	0.843	0.82	0.821	0.829	0.839	0.849	0.898	0.843	0.94	0.939	0.953		1.02	1.019	0.89	1.013	0.94	1.085	1.029	1.034	1.042	0.99	1.021	0.933	0.938	1.01		0.89	0.881	1.012	0.863	0.811	0.936	0.991	0.926	1.043	0.963	1.025
	0.849	0.876	0.791	0.955	0.826	0.893	0.828	0.776	0.842	0.844	0.945	0.872	1.052	0.907	0.884		1.018	1.045	0.917	0.987	0.973	0.948	0.91	0.977	1.067	0.994	1.051	0.962	0.99	1.023		0.876	0.845	0.969	0.882	0.831	0.934	1.01	0.983	1.03	0.98	0.986
	0.821	0.929	0.818	1.011	0.856	0.871	0.804	0.768	0.902	0.828	0.967	0.821	1.008	0.887	0.875		1.057	1.035	0.901	0.997	1.089	1.005	0.995	1.045	1.091	1	1.015	1	0.926	0.986		0.87	0.844	1.01	0.814	0.807	0.888	0.944	0.996	0.938	0.985	0.976
	0.827	0.943	0.782	0.997	0.826	0.791	0.787	0.797	0.893	0.913	1.019	0.886	0.994	0.912	0.911		0.992	1.022	0.917	1.003	0.966	0.937	0.904	0.964	1.066	0.973	1.017	1.022	0.99	0.969		0.861	0.857	0.947	0.791	0.808	0.852	0.929	0.995	0.92	1	0.902
	0.815	0.927	0.765	0.924	0.91	0.86	0.839	0.831	0.845	0.912	0.971	0.854	0.992	0.864	0.849		0.976	0.951	0.913	0.996	0.984	0.855	0.862	0.878	1.071	0.97	1.009	0.982	0.992	1.003		0.88	0.912	0.911	0.784	0.862	0.886	0.904	0.961	1.001	0.948	0.867
	0.82	0.907	0.813	0.902	0.847	0.926	0.816	0.78	0.864	0.871	0.938	0.851	0.921	0.899	0.904		0.915	0.942	0.917	1.02	0.997	0.954	0.966	0.983	1.065	0.944	1.016	0.97	0.991	0.975		0.872	0.893	0.882	0.757	0.795	0.887	0.855	0.932	0.998	0.942	0.89
	0.828	0.911	0.846	0.874	0.76	0.869	0.732	0.765	0.819	0.903	0.922	0.876	0.922	0.869	0.9		0.953	0.981	0.933	1.033	1.071	1.008	0.994	0.991	1.041	0.955	0.998	0.981	0.977	0.97		0.87	0.903	0.895	0.743	0.771	0.858	0.881	0.964	0.902	0.939	0.851
	0.822	0.876	0.829	0.865	0.822	0.892	0.819	0.805	0.8	0.9	0.908	0.866	0.892	0.894	0.893		0.961	1.012	0.9	1.031	1.024	0.924	0.924	0.94	1.018	1.002	1.049	0.96	0.947	1		0.849	0.844	0.91	0.788	0.806	0.816	0.855	0.92	0.953	0.905	0.849
	0.813	0.878	0.841	0.875	0.767	0.888	0.819	0.833	0.844	0.941	0.907	0.852	0.959	0.921	0.878		0.961	1.025	0.964	1.01	0.987	0.993	0.973	1.031	0.986	1.008	0.973	1	0.947	0.975		0.822	0.875	0.982	0.709	0.81	0.843	0.823	0.873	0.875	0.983	0.852
	0.799	0.831	0.78	0.876	0.792	0.906	0.794	0.795	0.83	0.94	0.881	0.818	0.966	0.878	0.854		1.038	0.955	0.92	1.008	0.924	0.952	0.939	0.972	1.007	0.985	0.985	0.957	0.953	0.954		0.813	0.853	0.906	0.717	0.805	0.782	0.83	0.851	0.876	0.938	0.804
	0.813	0.858	0.795	0.862	0.855	0.904	0.804	0.823	0.795	0.923	0.834	0.853	0.972	0.887	0.897		1.01	0.964	0.932	1.02	0.995	0.936	0.944	0.934	1.032	0.979	0.979	0.962	0.918	0.933		0.864	0.856	0.916	0.752	0.779	0.801	0.873	0.956	0.952	0.946	0.805
	0.933	0.886	0.793	0.903	0.798	0.864	0.774	0.829	0.865	0.897	0.831	0.821	0.954	0.952	0.835		0.976	0.994	0.91	1.06	1.042	0.977	0.993	1.002	1.047	0.97	0.923	0.992	0.885	0.944		0.921	0.844	0.929	0.703	0.786	0.824	0.89	0.932	0.962	0.928	0.829
	0.858	0.89	0.826	0.893	0.789	0.863	0.762	0.806	0.85	0.915	0.934	0.856	0.974	0.931	0.852		0.948	0.939	0.91	1.041	0.937	0.949	0.993	1.029	1.021	0.959	0.952	0.953	0.927	0.917		0.951	0.823	0.903	0.725	0.812	0.832	0.865	0.933	1.051	0.925	0.824
	0.842	0.888	0.822	0.854	0.809	0.874	0.804	0.827	0.832	0.897	0.945	0.832	0.99	0.955	0.852		0.938	0.966	0.884	1.024	1.009	0.969	0.982	1.025	1.004	0.976	0.942	0.957	0.946	1.017		0.952	0.847	0.892	0.704	0.803	0.914	0.855	0.929	0.988	0.886	0.833
	0.851	0.862	0.865	0.879	0.747	0.811	0.809	0.858	0.89	0.857	0.933	0.841	0.917	0.94	0.863		0.916	0.909	0.884	0.978	0.98	0.95	0.973	0.982	0.977	0.95	0.903	0.911	0.941	0.956		0.907	0.816	0.908	0.718	0.774	0.879	0.825	0.93	0.932	0.86	0.858
	0.841	0.897	0.828	0.817	0.748	0.908	0.818	0.901	0.862	0.824	0.937	0.823	0.874	0.944	0.862		0.972	0.89	0.884	0.997	1.003	0.954	0.929	0.999	0.953	0.956	0.956	0.894	0.869	0.954		0.855	0.817	0.878	0.7	0.818	0.866	0.848	0.942	0.935	0.869	0.837
	0.887	0.816	0.825	0.855	0.825	0.935	0.845	0.85	0.832	0.846	0.871	0.846	0.898	0.933	0.866		0.93	0.904	0.894	1.026	0.979	0.899	0.922	0.922	0.973	0.954	0.992	0.925	0.902	0.956		0.847	0.833	0.849	0.73	0.805	0.883	0.82	0.888	0.944	0.853	0.851
	0.866	0.841	0.809	0.851	0.795	0.897	0.788	0.881	0.854	0.856	0.881	0.842	0.897	0.92	0.902		0.942	0.953	0.927	1.027	0.966	1.069	0.992	0.974	0.983	0.985	0.995	0.929	0.962	0.953		0.844	0.816	0.843	0.683	0.784	0.876	0.824	0.937	0.902	0.85	0.846
	0.879	0.8	0.799	0.853	0.745	0.847	0.765	0.832	0.862	0.889	0.884	0.843	0.903	0.908	0.846		0.994	0.904	0.879	0.985	0.982	0.966	0.947	1.016	1.008	0.983	0.972	0.907	0.922	0.936		0.843	0.826	0.862	0.723	0.785	0.814	0.819	0.88	0.922	0.885	0.843
	0.864	0.829	0.848	0.84	0.776	0.888	0.815	0.804	0.847	0.859	0.864	0.845	0.882	0.91	0.9		0.987	0.942	0.907	1.001	0.96	0.97	0.909	0.955	0.93	0.959	0.924	0.907	0.949	0.898		0.856	0.802	0.859	0.718	0.811	0.806	0.822	0.877	1.009	0.855	0.846
	0.854	0.852	0.864	0.892	0.862	0.881	0.807	0.775	0.839	0.815	0.867	0.849	0.869	0.904	0.838		0.984	0.905	0.927	1.016	0.971	0.913	0.891	0.886	1.025	0.971	0.923	0.913	0.907	0.983		0.826	0.813	0.896	0.698	0.762	0.85	0.83	0.88	0.965	0.833	0.84
	0.846	0.894	0.877	0.863	0.826	0.871	0.787	0.772	0.884	0.835	0.872	0.845	0.828	0.888	0.878		0.943	0.991	0.943	1.045	0.942	0.944	0.995	0.957	1.004	1.001	0.921	0.945	0.917	0.971		0.899	0.862	0.958	0.71	0.794	0.829	0.895	0.916	0.957	0.844	0.844
	0.824	0.835	0.89	0.85	0.804	0.866	0.794	0.779	0.883	0.854	0.847	0.83	0.864	0.89	0.946		0.941	0.944	0.916	0.952	0.958	0.997	0.93	0.953	1.035	0.962	0.898	0.909	0.938	0.978		0.856	0.849	0.875	0.691	0.806	0.789	0.885	0.898	1.028	0.859	0.852
	0.824	0.826	0.852	0.87	0.753	0.815	0.776	0.789	0.823	0.885	0.872	0.808	0.87	0.937	0.888		0.951	0.939	0.942	0.993	1.067	0.96	0.942	0.937	0.972	0.966	0.915	0.875	0.945	0.987		0.828	0.825	0.875	0.717	0.78	0.842	0.847	0.921	0.924	0.886	0.841
	0.805	0.828	0.867	0.865	0.85	0.964	0.882	0.765	0.898	0.838	0.831	0.878	0.888	0.912	0.882		0.951	0.982	0.93	0.982	1.016	0.951	0.931	0.978	0.958	0.95	0.947	0.929	0.935	0.944		0.853	0.839	0.867	0.754	0.817	0.827	0.888	1.02	0.9	0.947	0.918
	0.798	0.806	0.855	0.835	0.812	0.862	0.777	0.784	0.901	0.927	0.866	0.851	0.893	0.886	0.892		0.917	0.932	0.956	1.023	1.013	0.975	0.962	0.975	0.94	1.003	0.96	0.939	0.915	0.926		0.896	0.785	0.854	0.87	0.854	0.811	0.869	0.974	0.963	0.899	0.881
	0.924	0.819	0.876	0.839	0.805	0.882	0.803	0.816	0.822	0.89	0.882	0.857	0.871	0.866	0.848		0.986	0.914	0.948	1.018	1	0.937	0.955	0.922	0.969	0.986	0.941	0.927	0.914	0.915		0.917	0.891	0.873	0.786	0.88	0.83	0.866	0.951	0.984	0.872	0.861
	0.893	0.833	0.892	0.979	0.806	0.871	0.786	0.849	0.841	0.857	0.819	0.843	0.868	0.911	0.894		0.961	0.958	0.976	1.028	0.982	0.966	0.927	0.95	0.999	0.939	0.908	0.891	0.941	0.962		0.947	0.897	0.865	0.771	0.82	0.852	0.937	0.929	1.066	0.869	0.869
	0.906	0.857	0.887	0.959	0.805	0.869	0.839	0.853	0.84	0.898	0.965	0.837	0.924	0.85	0.941		0.94	0.92	0.93	0.964	1.019	0.894	0.948	0.878	1.026	0.983	0.941	0.955	0.92	0.946		0.907	0.919	0.851	0.797	0.836	0.912	0.888	0.948	1.019	0.843	0.847
	0.855	0.948	0.882	0.94	0.847	0.865	0.793	0.861	0.862	0.891	0.985	0.879	0.957	0.899	0.926		0.952	0.937	0.97	0.977	0.999	0.862	0.963	0.932	1.027	0.926	0.965	0.93	0.909	0.924		0.94	0.925	0.889	0.733	0.858	0.903	0.898	0.934	0.978	0.864	0.814
	0.834	0.945	0.86	0.893	0.815	0.905	0.798	0.79	0.875	0.895	0.993	0.855	1.009	0.919	0.927		0.919	0.93	0.949	0.95	0.987	0.937	0.983	1.012	0.999	0.947	0.978	0.929	0.941	0.934		0.929	0.922	0.991	0.739	0.802	0.918	0.909	0.933	1.014	0.934	0.861
	0.89	0.87	0.868	0.955	0.872	0.936	0.855	0.822	0.923	0.849	0.942	0.952	0.975	0.901	0.858		0.907	0.935	0.986	1.002	1.099	0.924	0.948	0.929	0.983	0.941	1.009	0.935	0.945	0.914		0.85	0.861	1	0.755	0.785	0.874	0.945	0.953	1.012	0.912	0.916
	0.872	0.872	0.891	1.001	0.856	0.933	0.891	0.877	0.952	0.878	1.018	0.93	0.942	0.942	0.904		0.924	0.908	0.932	0.964	1.008	0.951	0.929	0.949	1.033	0.959	1.01	0.922	0.944	0.909		0.924	0.868	0.9	0.722	0.851	0.869	0.976	0.984	0.979	0.877	0.915
	0.839	0.862	0.91	0.996	0.845	0.903	0.833	0.833	0.853	0.871	1.063	0.914	0.917	0.919	0.923		0.979	0.962	0.959	0.981	0.909	0.934	0.954	0.924	1.011	0.962	0.995	0.903	0.953	0.936		0.94	0.86	0.906	0.728	0.838	0.876	0.944	0.976	0.982	0.869	0.922
	0.909	0.897	0.89	0.976	0.879	0.917	0.889	0.893	0.939	0.881	1.045	0.886	0.963	0.955	0.946		0.986	0.967	0.926	0.993	0.967	0.96	0.963	0.896	1.051	0.983	0.984	0.936	0.949	0.95		0.929	0.838	0.938	0.844	0.908	0.875	0.916	0.951	1.019	0.864	0.899
20h	0.894	0.875	0.882	1.01	0.888	0.98	0.876	0.921	0.885	0.952	1	0.969	1.024	0.952	0.91	20h	0.993	1.023	0.905	0.981	1.036	0.897	0.973	0.966	1.008	0.99	0.953	0.908	0.848	0.958	20h	0.896	0.823	1.011	0.76	0.855	0.942	0.947	0.942	0.95	0.845	0.915
	0.881	0.905	0.961	0.983	0.876	0.934	0.904	0.917	0.905	0.968	0.991	0.99	0.939	0.943	0.914		0.973	1.007	0.949	0.997	0.993	0.891	0.929	0.962	0.998	0.959	1.009	0.912	0.915	0.905		0.886	0.825	0.968	0.888	0.841	0.94	0.949	0.9	0.987	0.927	0.912
	0.931	0.915	0.971	0.99	0.904	0.937	0.911	0.958	0.91	0.924	0.992	0.923	0.919	0.961	0.954		1.02	0.978	0.95	0.982	0.978	0.956	0.967	0.982	1.026	0.982	0.981	0.96	0.987	0.869		0.9	0.917	0.967	0.874	0.888	0.95	0.977	0.975	0.987	0.933	0.953
	0.971	0.968	0.962	0.958	0.936	0.935	0.952	0.906	0.92	0.885	1.001	0.883	0.949	0.956	0.973		0.974	0.995	0.942	0.979	0.983	0.891	0.911	0.965	1.033	0.996	0.987	0.92	0.938	0.914		0.963	0.946	1.058	0.883	0.959	0.948	0.968	0.985	1.003	0.974	0.982
	0.955	0.943	0.949	0.992	0.943	0.947	0.922	0.944	0.945	0.929	1.03	0.973	0.977	0.972	0.968		0.954	0.986	0.927	1.007	0.989	0.915	0.961	0.975	1.074	0.995	0.982	0.92	0.989	0.924		0.947	0.942	0.93	0.854	0.923	0.918	0.975	0.984	1.004	0.944	0.959
	0.964	0.949	0.981	0.996	0.864	0.982	0.85	0.918	0.958	0.926	1.012	0.977	0.97	0.965	0.99		0.978	0.969	0.974	0.984	0.988	0.99	0.998	1.014	1.12	0.973	0.979	0.925	0.902	0.957		1.003	0.952	0.981	0.855	0.959	0.957	1.004	0.996	1.029	0.979	0.972
	0.972	0.926	0.963	0.991	0.996	0.973	0.97	0.976	0.924	0.944	0.996	0.971	0.99	0.97	0.978		0.966	0.964	0.966	0.993	0.979	0.9	0.915	0.932	1.041	0.967	1.003	0.924	0.986	0.972		1.008	0.973	1.003	0.916	0.95	0.976	0.979	1.001	1.07	0.982	0.981
	0.991	0.982	0.974	0.998	0.97	1.04	0.934	0.954	0.969	0.939	1.003	0.964	0.955	0.98	0.981		0.943	0.983	0.968	0.988	0.961	0.985	0.981	1.004	1.055	0.989	1.003	0.945	0.919	0.933		1.029	0.967	1.067	0.886	0.996	0.949	0.988	0.991	1.066	0.977	0.949
	0.942	0.956	0.977	1.013	0.945	1.05	0.934	0.939	0.951	0.958	1.022	1.005	0.989	0.983	1.05		0.993	0.984	0.966	0.984	0.994	0.964	0.979	0.984	1.039	0.993	1.023	0.92	0.945	0.925		1.016	0.972	1.041	0.945	0.957	0.979	0.969	1.029	1.003	0.99	1.003
	0.973	0.97	0.948	1.026	0.976	0.975	0.955	0.965	0.962	0.962	1.031	0.992	0.962	0.98	1.026		1.03	1.006	0.963	0.993	0.98	0.98	1.037	0.952	1.043	0.996	0.997	0.917	0.918	0.918		1.021	0.973	1.045	0.894	0.989	0.957	1.019	1.016	1.052	0.951	1.014
	0.976	0.988	0.994	0.999	0.942	0.987	0.929	0.929	0.964	0.958	1.007	0.98	0.983	0.965	1.004		1.026	0.998	0.94	1.006	1.002	0.945	0.95	0.982	1.029	0.994	1.058	0.919	0.957	0.935		1.022	1.031	1.002	0.905	0.961	0.971	1.009	1.009	1.053	1.015	1.019
	0.993	1.004	0.975	1.013	0.934	1.007	0.938	0.963	0.949	0.972	1.013	1.016	1.026	0.892	1.006		0.952	0.917	0.956	0.979	0.961	1.01	0.978	0.972	1.027	0.985	1.008	0.942	0.92	0.939		1.027	1	1.047	0.956	0.978	0.98	1.007	0.959	1.033	0.997	1.022
	0.965	0.983	0.973	1.01	0.99	0.967	0.994	0.966	0.977	0.962	1.035	1.003	1.027	0.911	1.037		0.975	1.006	0.942	0.977	0.993	0.94	0.942	0.952	1.066	0.99	1.028	0.934	0.945	0.948		1.024	1.006	1.054	0.943	0.98	0.996	1.049	1.016	1.036	1.051	1.048
	0.961	1.007	1.01	1.006	0.94	1.044	0.966	0.925	0.987	0.971	1.016	1.011	0.986	0.954	0.989		1.008	0.99	1.004	1.007	1.006	0.998	1.013	1.013	1.025	0.977	1.013	0.915	0.943	0.92		1.055	1.04	1.098	0.949	1.001	0.999	1.02	1.039	1.011	1.016	1.013
	0.994	0.977	0.963	1.009	0.985	1.049	0.981	0.96	0.933	0.993	1.004	1.012	0.995	0.973	1.022		0.98	0.98	0.988	1	1	0.939	0.986	0.961	1.046	0.978	1.017	0.941	0.985	0.893		1.017	1	1.043	0.95	1.02	0.978	1.006	1.042	1.034	1.033	0.987
	0.959	1.006	0.98	1.025	0.931	0.963	0.953	0.952	0.96	0.968	1.005	1.017	1.016	0.973	1.01		1.03	1.005	0.971	1.02	1.024	0.982	1.032	1.021	1.027	0.963	1.079	0.943	0.975	0.897		1.036	1.004	1.022	0.976	0.973	0.978	1.003	0.986	1.051	1.045	1.012
	0.992	0.967	0.958	1.007	0.938	0.982	0.911	0.986	0.962	0.962	1.035	1.011	1.003	0.931	1.02		0.954	0.961	0.97	0.989	1.001	1.028	0.997	1.032	1.021	0.983	1.035	0.946	0.966	0.959		1.04	0.999	1.014	0.938	0.949	0.985	1.008	1.038	1.033	1.048	1.006
	0.981	1.011	1.037	1.035	0.918	0.989	0.948	0.946	0.95	0.952	1.034	1.011	0.99	0.941	1.003		1.05	1.01	0.958	1.002	1.045	0.998	0.958	0.993	1.041	0.985	0.987	0.955	0.906	0.954		1.032	1.041	1.051	0.923	0.972	0.995	0.998	1.009	1.03	0.989	0.978
	0.986	0.98	0.953	1.021	0.891	0.985	0.957	0.928	0.948	0.947	1.034	1.028	1.039	0.929	1		0.95	0.987	0.989	0.966	1.018	0.984	0.949	0.956	1.07	0.99	1.023	0.944	0.954	0.921		1.013	1.014	1.035	0.956	1.007	0.985	1.04	1.008	1.03	1.01	0.937
	1.003	1.01	0.992	1.017	0.897	0.967	0.936	0.978	0.986	0.957	1.018	1.021	1.009	0.939	1.007		1.047	1.011	0.982	1.002	0.988	1.017	0.936	0.979	1.04	0.988	1.029	0.942	0.956	0.948		1.055	1.025	1.105	0.961	0.999	1.005	1.037	1.004	1.036	1.031	0.884
	1.009	0.97	0.953	1.01	0.863	1.047	0.932	0.984	0.982	0.964	1.026	0.995	1.001	0.93	0.986		0.967	0.973	0.96	0.972	1.03	0.993	0.895	0.97	1.086	1.026	1.017	0.927	0.936	0.944		1.069	1.001	1.035	1.017	0.979	0.989	1.032	1.068	1.022	1.023	0.889
	0.99	0.966	0.977	1.029	0.858	0.934	0.913	0.961	0.925	0.963	1.044	1.025	1.005	0.945	1.003		0.981	0.965	0.979	0.981	1.028	0.997	0.879	0.991	1.098	0.956	1.016	0.919	0.968	0.93		1.101	1.008	1.044	0.942	1.01	1.001	1.023	1.065	1.039	1.041	0.873
	0.992	0.928	0.925	0.999	0.903	0.976	0.952	0.881	0.958	0.875	1.034	1.034	1.052	0.943	1.032		0.924	0.932	0.959	0.978	1.009	0.94	0.903	0.954	1.039	0.985	1.028	0.916	0.939	0.917		1.04	0.973	1.006	0.937	0.995	1.007	1.025	1.078	1.091	1.039	0.857
	0.945	0.966	0.932	1.05	0.809	0.906	0.881	0.949	0.944	0.906	1.028	1.039	1.063	0.934	1.012		0.933	0.994	0.983	0.984	0.975	0.928	0.952	0.997	0.985	0.973	0.983	0.911	0.942	0.925		1.112	1.039	1.054	0.934	0.966	1.003	0.996	1.08	1.076	0.985	0.843
	0.937	0.966	0.886	0.985	0.787	0.902	0.892	0.947	0.939	0.887	1.038	1.034	1.048	0.991	1.024		0.902	0.976	0.963	0.975	1.012	0.92	0.921	0.953	0.909	0.96	0.989	0.897	0.978	0.962		1.056	1.029	1.004	0.924	0.93	1	1.038	1.037	1.018	0.96	0.913
	0.954	0.972	0.913	1.001	0.802	0.992	0.823	0.925	0.979	0.891	1.086	1.025	1.006	0.927	1.079		0.903	0.984	0.975	0.968	1.018	0.944	0.947	0.982	0.978	0.989	1.019	0.917	0.953	0.955		1.038	1.022	0.999	0.938	0.993	0.968	1.001	1.057	1.078	0.996	0.809
	0.921	0.991	0.86	0.983	0.843	1.094	0.873	0.904	0.93	0.872	1.035	1.024	0.982	0.944	1.043		0.972	0.967	0.964	0.996	1.059	0.953	0.979	0.987	1.016	0.987	1.048	0.916	0.954	0.946		1.123	0.973	0.979	0.919	0.967	1.014	0.961	1.002	0.978	0.984	0.82
	0.93	0.944	0.877	1.014	0.82	0.925	0.866	0.912	0.926	0.9	1.012	1.014	1	0.929	1.021		0.997	0.983	0.994	0.971	0.988	0.973	0.966	1.016	0.997	1.015	1.018	0.907	0.914	0.963		1.063	0.937	0.912	0.904	0.931	0.965	0.95	1.016	1.03	0.978	0.807
	0.89	0.922	0.912	0.997	0.865	1.026	0.853	0.896	0.906	0.851	1.029	1.026	1.025	0.947	1.015		1.016	1.026	0.98	1.008	1.071	0.959	0.961	0.964	0.997	0.973	0.969	0.905	0.983	0.959		1.023	0.978	0.953	0.941	0.918	0.993	0.974	0.992	1.014	0.998	0.793
	0.997	0.95	0.847	0.978	0.867	0.934	0.864	0.881	0.94	0.932	1.006	1.018	0.981	0.935	1.023		0.957	0.917	0.94	1.009	1.047	0.964	0.942	1.009	0.974	0.978	0.983	0.915	0.946	0.902		0.999	0.955	0.976	0.932	0.966	0.98	0.991	0.941	0.911	0.952	0.806
	0.957	0.929	0.909	1.007	0.839	0.903	0.854	0.906	0.932	0.895	1.008	1.033	1.002	0.982	1.013		0.936	1.012	0.953	0.996	1.063	1.01	0.965	0.945	0.965	1.035	0.999	0.912	0.953	0.919		1.026	0.939	0.982	0.936	0.964	0.976	0.91	0.996	0.945	1.016	0.855
	0.983	0.849	0.928	1.036	0.908	0.81	0.906	0.917	0.95	0.935	1.01	1.05	1.025	0.969	1.018		0.912	1.025	0.97	0.982	0.968	0.981	0.957	0.93	0.957	0.979	1.006	0.905	0.922	0.928		1.026	0.964	0.959	0.952	0.919	0.962	0.905	0.928	0.895	0.997	0.838
	0.953	0.909	0.919	0.937	0.919	0.9	0.908	0.927	0.943	0.948	0.945	1.062	0.965	0.908	0.98		0.946	0.992	0.962	1.041	1.04	0.959	0.959	0.974	1.013	1.02	0.987	0.905	0.954	0.939		1.081	0.989	0.921	0.931	0.943	0.975	0.899	0.96	0.919	0.953	0.789
	0.954	0.954	0.94	0.973	0.893	0.985	0.836	0.881	0.933	0.977	0.942	1.021	0.981	0.915	0.983		1.045	1.016	0.953	1.009	1.111	0.93	1.019	0.991	0.987	0.961	0.923	0.933	0.959	0.918		1.054	0.936	0.868	0.924	0.929	0.994	0.913	0.965	0.915	0.993	0.797
	0.986	0.91	0.95	1.012	0.922	0.921	0.913	0.956	0.944	0.944	0.941	1.012	0.988	0.967	0.99		0.965	0.963	0.953	0.98	0.998	0.92	0.974	0.93	0.969	0.983	1	0.929	0.962	0.921		1.026	0.878	0.865	0.965	0.949	1.008	0.91	0.983	0.87	0.972	0.807
	0.994	0.967	0.954	0.981	0.846	0.85	0.846	0.936	0.938	0.957	0.962	1.071	0.977	0.942	1.007		0.974	1.028	0.993	0.988	1.068	0.986	0.994	1.006	1.011	0.994	1.004	0.928	0.939	0.885		1.064	0.9	0.857	0.962	0.908	0.985	0.898	0.964	0.845	1.018	0.806
	0.972	0.913	0.941	0.987	0.948	0.89	0.899	0.93	1.003	0.949	0.901	1.026	0.985	0.946	1.049		1.001	0.949	0.958	0.967	1.091	0.918	0.94	0.928	1.025	1.022	0.953	0.937	0.939	0.951		1.086	0.942	0.937	0.95	1.017	1.007	0.851	0.996	0.988	1.039	0.799
	0.952	0.966	0.94	1.001	0.89	0.925	0.862	0.942	0.942	0.922	0.911	1.018	1.002	0.925	1.009		1.054	1.023	0.96	0.979	1.019	0.949	0.961	0.975	0.968	1.01	1.001	0.969	0.95	0.922		1.029	0.924	1.004	0.934	0.935	0.949	0.864	0.895	0.934	0.986	0.845
	0.914	0.924	0.938	0.959	0.915	0.979	0.878	0.927	0.923	0.906	0.938	1.011	0.975	0.885	0.968		1.015	0.971	0.957	0.97	1.044	0.919	0.959	0.942	0.997	1.025	0.967	0.944	0.97	0.919		1.104	1.001	1.006	0.959	0.949	1.012	0.848	0.947	0.897	0.974	0.839
	0.898	0.949	0.895	1.028	0.948	1.04	0.908	0.912	0.936	0.918	0.984	1.027	0.989	0.858	1.026		0.945	0.937	0.97	1.009	1.059	0.919	1.002	0.938	1.085	1.03	0.99	0.929	0.935	0.953		1.012	0.921	1.012	0.944	0.937	0.973	0.895	0.974	0.926	1.027	0.82
8h	0.956	0.869	0.865							0.857	1.001	0.987	1.019	0.862	0.989	8h	0.965	0.984									1.004	0.94	0.983	0.947	8h	1.03	0.92	1.003				0.874	0.992	0.928	0.994	0.871
	0.926	0.86	0.852							0.885	0.935	0.969	0.935	0.841	0.994		1.032	1.029									1.003	0.924	0.958	0.93		1.054	0.925	1.02				0.832	0.975	0.983	0.993	0.773
	0.922	0.852	0.868							0.85	0.923	0.986	0.959	0.881	0.986		1.055	0.986									1.006	0.914	0.992	0.901		0.986	0.876	1.027				0.844	1.021	0.941	0.997	0.816
	0.849	0.846	0.871							0.925	0.917	0.961	0.895	0.863	0.962		0.99	0.986									0.985	0.939	0.98	0.93		0.944	0.853	1.029				0.803	0.96	0.942	0.973	0.859
	0.864	0.876	0.805							0.814	0.942	0.906	0.908	0.831	1.01		0.989	0.973									1	1.032	0.946	0.95		0.983	0.912	1.028				0.876	0.981	0.997	0.936	0.787
	0.834	0.849	0.837							0.889	0.913	0.842	0.911	0.809	0.907		1.039	0.969									1.017	0.917	0.987	0.947		0.975	0.814	0.971				0.772	0.995	0.889	0.915	0.804
	0.938	0.887	0.836							0.904	0.89	0.931	0.898	0.797	0.929		0.981	1.038									1.043	0.958	0.983	0.947		0.952	0.839	1.047				0.815	1.014	0.921	0.962	0.811
	0.865	0.892	0.859							0.867	0.867	0.833	0.848	0.808	0.977		0.958	0.954									1.018	0.933	0.943	0.941		0.947	0.83	0.965				0.873	1.031	0.957	0.912	0.813
	0.88	0.889	0.889							0.882	0.89	0.859	0.862	0.828	0.882		0.913	1									1.041	0.925	0.935	0.948		0.914	0.815	0.947				0.823	0.985	0.951	0.887	0.797
	0.847	0.837	0.857							0.891	0.857	0.827	0.863	0.804	0.901		0.931	1.003									0.933	0.913	0.948	0.921		0.865	0.872	0.904				0.798	0.949	1.007	0.898	0.783
	0.921	0.816	0.831							0.825	0.899	0.85	0.868	0.806	0.897		1.007	0.99									1.012	0.937	0.926	0.93		0.898	0.851	0.896				0.774	0.956	0.97	0.851	0.771
	0.957	0.901	0.844							0.895	0.842	0.868	0.866	0.83	0.91		1.041	0.997									1.002	0.936	1.011	0.926		0.867	0.843	0.878				0.785	0.947	0.91	0.889	0.846
	0.852	0.885	0.829							0.82	0.862	0.849	0.847	0.798	0.872		1.027	1.014									0.999	0.941	0.953	0.904		0.892	0.85	0.92				0.787	0.956	0.868	0.836	0.776
	0.859	0.857	0.817							0.865	0.839	0.833	0.896	0.803	0.868		0.941	0.943									0.956	0.934	0.952	0.933		0.866	0.842	0.85				0.804	0.887	0.918	0.872	0.824
	0.883	0.86	0.824							0.853	0.844	0.863	0.872	0.782	0.891		0.975	1.024									0.975	0.925	0.963	0.934		0.879	0.877	0.909				0.796	0.845	0.911	0.856	0.823
	0.858	0.826	0.815							0.816	0.819	0.797	0.852	0.796	0.86		0.961	0.934									0.97	0.93	0.977	0.946		0.915	0.886	0.861				0.804	0.844	0.92	0.96	0.811
	0.881	0.857	0.822							0.864	0.848	0.815	0.868	0.812	0.876		0.989	0.907									1.023	0.948	0.99	0.935		0.908	0.872	0.883				0.791	0.845	0.91	0.892	0.827
	0.826	0.806	0.828							0.905	0.817	0.859	0.842	0.82	0.901		0.913	0.938									0.999	0.958	0.961	0.929		0.851	0.837	0.952				0.795	0.853	0.846	0.9	0.81
	0.837	0.871	0.864							0.877	0.828	0.84	0.84	0.859	0.873		0.938	0.965									0.962	0.933	0.98	0.929		0.87	0.855	0.927				0.78	0.855	0.936	0.87	0.789
	0.911	0.827	0.886							0.852	0.878	0.843	0.868	0.827	0.887		1.05	0.985									0.955	0.917	0.904	0.913		0.883	0.873	0.963				0.784	0.825	0.991	0.875	0.826
	0.924	0.805	0.86							0.87	0.874	0.834	0.849	0.834	0.851		0.902	0.903									0.943	0.889	0.957	0.922		0.908	0.832	0.913				0.814	0.821	0.887	0.847	0.796
	0.89	0.842	0.824							0.82	0.869	0.851	0.835	0.83	0.892		0.977	0.933									0.991	0.928	1.007	0.932		0.974	0.84	0.973				0.821	0.822	0.891	0.904	0.782
	0.859	0.913	0.806							0.926	0.876	0.865	0.869	0.835	0.88		0.992	0.964									0.979	0.918	0.958	0.944		0.952	0.809	0.896				0.811	0.851	0.932	0.901	0.817
	0.843	0.867	0.831							0.886	0.849	0.839	0.849	0.811	0.852		0.966	0.922									0.945	0.901	0.952	0.909		0.926	0.849	0.881				0.787	0.898	0.971	0.882	0.819
	0.832	0.871	0.82							0.888	0.858	0.834	0.841	0.81	0.842		0.97	0.956									0.988	0.924	0.996	0.888		0.896	0.85	0.885				0.791	0.854	0.858	0.873	0.804
	0.826	0.881	0.921							0.874	0.863	0.829	0.85	0.797	0.827		0.945	0.974									0.971	0.939	0.944	0.895		0.94	0.873	0.871				0.793	0.85	0.899	0.867	0.802
	0.828	0.857	0.89							0.877	0.852	0.837	0.824	0.809	0.921		0.92	0.954									0.991	0.907	0.983	0.904		0.915	0.835	0.898				0.825	0.886	0.873	0.872	0.857
	0.898	0.818	0.845							0.89	0.838	0.808	0.852	0.833	0.885		0.88	0.936									0.958	0.941	1.024	0.922		0.951	0.797	0.912				0.78	0.822	0.909	0.953	0.823
	0.907	0.843	0.869							0.877	0.822	0.861	0.823	0.867	0.881		0.913	0.96									0.951	0.915	0.947	0.873		0.887	0.846	0.91				0.796	0.847	0.936	0.934	0.834
	0.956	0.819	0.935							0.87	0.844	0.862	0.925	0.888	0.969		0.972	0.941									0.943	0.949	0.97	0.886		0.883	0.817	0.906				0.8	0.864	0.95	0.979	0.948
	0.917	0.84	0.918							0.878	0.825	0.831	0.978	0.863	0.905		0.99	0.995									0.909	0.922	0.959	0.879		0.891	0.862	0.929				0.791	0.814	1.039	0.933	0.984
	0.904	0.847	0.899							0.836	0.902	0.841	0.958	0.855	0.91		0.974	0.957									0.922	0.916	0.94	0.895		0.931	0.911	0.876				0.809	0.82	0.968	0.936	0.982
	0.889	0.831	0.919							0.899	0.939	0.841	0.948	0.871	0.888		0.982	0.951									0.934	0.92	0.929	0.872		1.011	0.908	0.865				0.786	0.905	0.91	0.88	1.002
	0.88	0.881	0.99							0.939	0.957	0.828	0.926	0.85	0.908		0.971	0.999									0.952	0.936	0.955	0.83		0.945	0.947	0.859				0.813	0.93	0.93	0.896	1.001
	0.929	0.871	0.938							0.911	0.972	0.829	0.934	0.925	0.867		0.907	0.948									0.998	0.921	0.945	0.865		0.878	0.839	0.882				0.797	0.922	0.955	0.93	0.986
	0.94	0.875	0.927							0.918	0.983	0.84	0.956	0.903	0.875		0.94	0.968									0.956	0.903	0.963	0.849		0.932	0.975	0.996				0.802	0.941	1.016	0.976	1.013
	0.907	0.87	0.912							0.908	0.972	0.835	0.983	0.856	0.938		0.981	0.99									1.21	0.93	0.978	0.863		0.999	0.946	1.038				0.842	0.934	1.006	0.95	1.012
	0.913	0.853	0.924							0.872	0.884		0.957	0.866	0.939		0.978	0.979									0.967	0.91	0.979	0.85		0.969	0.909	0.996				0.92	0.89	0.993	0.951	1.016
	0.935	0.813	0.924							0.97	0.985	0.987	0.955	0.922	0.918		0.992	0.905									0.946	0.881	0.995	0.846		0.992	0.887	0.957				0.93	0.951	0.951	0.924	0.983
	0.981	0.851	0.935							0.972	0.981	0.963	0.918	0.916	0.892		0.957	0.962									0.971	0.912	0.898	0.825		0.934	0.853	1.008				0.958	0.994	0.999	0.977	0.994
20h	0.986	0.925	0.951							0.927	0.961	0.904	0.954	0.917	0.94	20h	0.945	0.966									1.014	0.923	0.96	0.87	20h	0.929	0.918	1.022				0.92	0.939	1.038	0.964	1.033
	0.998	0.931	0.949							0.875	0.961	0.845	0.978	0.902	0.977		0.978	0.966									1.021	0.934	0.994	0.876		0.941	0.894	1.043				0.897	0.954	0.986	0.963	1.025
	0.992	0.909	0.943							0.884	0.986	0.907	0.933	0.935	0.922		0.998	1.007									0.967	0.948	0.962	0.875		0.907	0.917	1.032				0.946	0.998	0.985	0.946	1.009
	1.002	0.99	0.993							0.906	0.992	0.956	0.974	0.958	0.956		1.007	0.986									0.958	0.975	1	0.933		0.855	0.98	1.05				0.961	0.982	1.003	0.953	1.026
	0.982	0.971	0.97							0.907	1.004	0.988	0.977	0.977	0.969		1.006	0.936									1.014	0.994	0.964	0.889		1.005	0.963	1.055				0.954	0.929	0.994	0.999	1
	1.024	0.947	0.989							0.929	0.989	0.903	0.956	0.987	0.992		0.986	0.988									1.008	1.029	0.962	0.873		1.035	0.992	1.036				0.96	0.982	1.02	0.963	1
	1.017	0.969	0.991							0.934	0.983	0.953	0.937	0.973	1.022		0.974	1.013									1	0.944	0.937	0.84		1.009	0.979	1.046				0.968	0.959	1.012	0.955	1.054
	1.048	1	1.014							0.967	0.995	1.004	0.996	1.014	0.985		1.043	0.995									1.002	1.019	0.99	0.857		0.988	1.002	1.068				0.982	0.978	1.037	0.999	1.063
	1.036	0.991	1.008							0.972	1.012	0.994	1.024	0.958	0.995		1.008	0.979									1.004	0.941	1.001	0.9		1.061	0.983	1.102				0.987	0.998	1.016	1.007	1.026
	1.014	0.987	0.986							0.94	1.001	0.961	0.983	0.965	0.994		1.007	1.002									0.998	0.98	0.969	0.86		1.041	1.028	1.087				0.986	1.025	1.01	1.038	1.009
	1.013	1.026	1.004							0.968	1.008	1.004	0.959	0.952	0.982		1.059	0.987									1.014	1.092	0.948	0.871		1.015	0.998	1.1				0.997	0.998	1.015	0.973	1.019
	1.058	0.991	0.983							0.97	0.99	0.994	0.983	0.958	1.002		0.921	1.034									1.007	1.007	0.971	0.881		1.092	1.035	1.065				1.012	1.015	1.06	1.011	1.013
	0.995	0.971	0.998							0.975	1.022	1.047	0.987	0.97	0.99		1.028	1.007									1.013	1.035	0.945	0.878		1.037	1.031	1.147				1.032	1.029	0.996	1.002	1.04
	1.015	1.02	1.015							1.002	1.007	1.002	0.991	0.994	1		1.018	1.031									0.996	0.923	0.969	0.887		1.075	1.041	1.074				1.023	1.028	1.022	1.014	1.037
	1.015	0.966	1.001							0.972	1.033	1.016	1	0.999	1.014		0.974	1.014									1.018	0.972	0.956	0.858		1.088	1.041	1.044				1.005	0.991	1.042	0.974	1.022
	1.074	1.006	1.01							0.962	1.026	0.996	1	1.005	1.046		1.02	1.031									1.031	0.989	0.95	0.888		1.035	1.02	1.071				1.034	1.005	1.061	0.996	1.035
	0.999	0.977	1.041							0.964	1.023	1.056	1.019	0.987	1.06		1.047	0.992									1.059	1.019	0.965	0.894		1.068	1.067	1.098				1.057	1.044	1.068	1.011	1.063
	0.992	0.985	1.03							0.996	1.011	1.048	1.032	0.996	1.032		0.99	0.966									0.994	0.902	0.968	0.883		1.045	1.011	1.088				1.056	1.016	1.041	1.048	1.052
	1.04	0.995	1.05							0.998	1.023	1.07	1.018	0.988	1.012		0.968	1.045									0.976	1.04	0.975	0.873		1.054	1.011	1.08				1.031	1.049	1.03	1.035	1.081
	1.022	0.985	1.03							1.002	1.067	1.012	1.004	0.992	1.029		0.973	1.025									0.99	1.051	0.972	0.85		1.068	1.1	1.064				1.013	1.014	1.026	1.036	1.05
	1.023	0.965	1.015							0.962	1.025	1.008	1.027	0.952	1.015		0.955	0.989									0.981	0.884	0.984	0.833		1.05	1.007	1.088				1.019	1.025	1.099	0.962	1.086
	1.006	0.956	0.994							0.977	1.038	0.98	1.018	0.961	0.994		1.024	1.018									1.005	0.923	0.964	0.909		1.032	1.018	1.09				1.039	0.999	1.008	0.972	1.065
	0.997	0.945	1.04							0.992	1.043	1.013	0.967	0.953	1.033		1.01	1.044									0.999	0.967	0.948	0.908		1.124	1.028	1.054				1.063	1.015	0.969	0.991	1.055
	0.981	0.986	0.993							0.983	1.023	1.007	1.016	1.003	1.078		1.049	0.999									1.004	0.966	0.981	0.895		1.138	1.017	1.076				1.059	0.994	0.984	1.021	1.042
	0.975	0.95	1.046							0.975	1.052	1.001	1.023	0.961	1.04		1.007	0.994									0.973	0.916	0.966	0.907		1.077	1.058	1.138				1.052	0.983	0.966	0.988	1.065
	1.012	0.991	0.968							0.967	1.008	0.986	1.023	0.985	1.099		0.978	0.978									0.988	0.981	0.988	0.903		1.009	1.019	1.123				1.066	1.013	1.026	0.956	1.088
	0.957	0.96	0.949							0.903	1.015	1.009	0.995	1.002	1.008		1.011	1.042									1.025	1.005	0.965	0.87		1.045	1.009	1.139				1.08	1.002	0.993	0.912	1.064
	0.96	0.977	0.964							0.943	1.051	0.893	1.022	0.975	1.012		0.918	0.933									0.991	0.908	0.958	0.858		1.024	0.946	1.103				1.018	0.996	0.932	0.917	1.066
	0.951	0.997	0.968							0.931	1.021	0.907	0.955	0.914	0.994		0.975	0.995									1.013	0.912	0.919	0.858		1.029	0.979	1.034				1.031	0.959	0.946	0.885	1.035
	0.994	0.944	0.954							0.931	1.064	0.932	0.981	0.869	1.006		0.929	0.991									1.024	1.031	0.953	0.874		0.992	0.883	0.996				1.03	0.911	0.867	0.948	1.045
	0.939	0.963	0.998							0.955	1.02	0.851	0.972	0.943	0.966		0.958	0.949									1.014	1.007	0.954	0.893		0.893	0.914	1.012				1.021	0.886	0.936	0.949	1.112
	0.931	0.928	1							0.942	1.004	0.877	1.012	0.935	1.009		1.04	0.997									0.986	1.026	0.929	0.909		1.006	0.998	0.939				1	0.909	0.947	0.949	1.07
	0.968	0.968	0.999							0.964	1.03	0.992	0.965	0.991	1.033		1.026	0.984									0.99	0.898	0.958	0.907		1.013	1.022	0.92				1.012	0.852	0.969	0.999	1.049
	0.951	0.958	1.008							0.97	1.006	0.945	0.988	0.986	0.986		1.054	1.015									0.991	0.923	0.951	0.909		1.096	0.982	0.901				1.022	0.842	0.987	0.968	1.012
	0.966	0.976	0.974							0.956	1.032	0.919	0.975	0.945	0.921		0.935	1.028									1.015	0.964	0.936	0.89		0.973	0.944	0.973				1.004	0.877	0.97	0.969	1.073
	1.005	0.915	0.975							0.978	1.069	0.987	0.978	0.962	0.949		0.967	0.992									0.965	0.985	0.951	0.876		1.072	0.975	1.008				1.008	0.825	0.959	0.966	1.014
	0.986	0.995	1.002							0.973	0.989	0.999	0.979	1.024	0.941		1.003	1.027									0.941	0.963	0.95	0.92		1.019	1.048	1.05				0.99	0.804	0.944	1.028	1.062
	0.952	0.994	0.94							0.961	1.003	0.983	0.995	0.989	1.032		1.062	1									0.978	1.016	0.969	0.954		1.011	0.973	1.022				0.997	0.811	0.951	1.004	1.069
	0.978	0.976	1.035							0.993	1.019	1.003	1.01	0.998	1.018		1.019	1.009									1.011	0.984	1.011	0.889		1.049	0.998	1.026				1.025	0.949	0.959	1.043	1.035
8h	0.95	0.958	0.932							1.007	0.992	0.987	1.013	0.984	0.931	8h	0.941	0.946									1.004	1.016	0.966	0.928	8h	1.106	0.993	1.039				1.032	0.969	0.955	1.031	1.033

## Sheet: Fig 2I
Average ambulatory activity
Dark phase				Light phase				24h
Ubi	LepRNull	Ubi-LepRNull		Ubi	LepRNull	Ubi-LepRNull		Ubi	LepRNull	Ubi-LepRNull
22457.4	1450.6	7064.6		7045.75	1243	3672.75		30900	2783	11433
26040	1431.6	14362		6227.25	980.75	3306		31143	2415.5	18363.5
16328.8	2553	6043.6		5283.25	981	3318		21742.8	3688	9560.5
10473.8	2283	18014.8		4761.67	1400	3865.33		14328	3935	21155
20884	3219	18387.2		6317.67	999	3794.67		26144.3	4475.33	21463.7
25120	6874	10635		7939.67	2747	3129.67		35390.3	8752.67	13518.7
13365.5	4091	14256.6		3440.67	1584	4412.25		16817.7	5428.33	19984.5
19017.8	5188	5718.6		5553.33	1173	2639.75		23376	5883.33	8016
16243	2034	18450		4983.33	1814	4540		20088.3	3992	25075
13942.8	795			5204	422			19647.5	1186.67
15745.6	2557			4380.5	1871			20601.8	4430.75
1176.4	1176			933.5	934			2290.75	2290.75
14206.4	1731			3743.25	1009			17717.5	2828.75
18819	1779			4677	1275			24828.8	3245
19444.4				7393.75				27952

## Sheet: Fig 2J
Ambulatory activity
Time of day	Ubi															Time of day	LepRNull														Time of day	Ubi-LepRNull
18h	1	2	10	51	56	246	122	165	203	309	293	22	564	77	425	18h	7	26	115	2	3	194	284	97	84	22	2	22	49	5	18h	197	10	154	217	17	21	303	12	357
	192	14	192	227	5	1067	10	95	224	3	20	0	5	178	50		39	11	64	18	31	3	41	4	134	26	130	0	87	0		175	3	0	2	3	5	659	10	47
	455	0	216	15	387	69	34	27	11	5	27	2	10	17	1		93	12	89	9	29	0	23	0	111	83	96	2	16	134		3	6	2	32	8	4	206	40	30
	497	4	0	13	38	6	4	25	17	40	28	8	17	2	5		21	27	0	127	2	7	38	3	27	18	6	8	9	3		0	199	2	159	343	142	25	18	0
	18	46	0	79	9	21	146	27	10	3	125	4	29	1	22		17	70	0	113	29	5	106	36	61	14	25	4	2	1		17	205	202	79	636	22	34	75	17
	46	439	56	225	13	190	93	50	179	8	380	4	45	28	374		150	100	5	3	30	141	181	60	45	1	49	4	1	26		117	7	2	14	61	3	6	133	81
20h	191	22	0	472	30	94	2	307	404	505	55	56	26	251	117	20h	41	51	0	156	13	99	58	79	236	4	147	56	19	168	20h	63	15	3	170	0	39	196	6	774
	245	26	153	108	195	6	535	130	7	515	31	28	936	31	18		6	0	94	332	87	12	4	13	103	71	128	28	51	14		156	18	209	855	47	29	227	93	99
	334	65	452	21	6	112	212	480	55	11	692	10	499	877	252		31	109	82	107	29	12	47	16	32	0	101	10	8	35		216	460	176	818	25	458	148	115	30
	163	1529	246	65	64	428	61	691	650	25	1308	52	178	1049	912		96	78	130	128	245	15	180	110	93	47	86	52	36	186		150	400	25	65	10	116	215	606	211
	1341	1381	156	293	616	514	2	613	1168	499	954	93	342	219	1364		107	4	117	216	121	5	32	219	85	62	105	93	30	167		489	4	25	482	65	24	1408	229	444
	494	0	342	679	195	743	40	185	374	886	639	14	1033	104	195		93	22	25	352	38	254	0	116	114	27	99	14	60	49		324	337	291	679	376	96	679	90	829
	96	51	812	520	207	230	84	453	25	58	933	19	142	1082	96		115	20	130	56	40	155	40	76	8	5	116	19	77	6		9	709	229	176	500	27	192	50	325
	265	1413	43	44	57	299	154	489	456	14	311	0	54	612	756		67	50	29	56	38	50	136	272	115	8	66	0	181	124		92	246	395	63	86	19	385	166	14
	1221	924	39	446	832	210	24	108	366	59	46	3	246	34	1032		10	122	69	70	26	6	141	181	78	7	13	3	50	55		319	11	6	652	42	281	98	107	2
	399	541	888	296	1729	202	203	127	82	760	121	51	470	72	1248		10	21	104	60	256	8	68	176	11	0	179	51	10	8		305	7	196	681	240	139	585	24	804
	26	6	706	239	410	79	43	267	135	489	736	8	622	456	944		12	5	240	5	115	328	73	328	63	68	136	8	6	1		31	70	668	344	437	8	1317	4	943
	408	9	1487	182	62	267	264	1344	335	391	470	31	39	1240	1412		67	4	96	5	25	159	55	141	79	0	59	31	26	77		1	548	699	5	796	51	947	110	316
	1655	31	59	335	560	179	331	615	123	0	66	58	642	86	36		172	4	51	1	20	495	105	202	100	16	47	58	63	79		175	201	0	384	356	246	1000	52	34
	375	59	32	84	717	73	77	134	58	108	93	11	1108	76	29		13	50	98	86	91	21	156	177	14	2	3	11	77	155		332	337	19	723	82	661	865	249	13
	7	343	1301	903	287	159	1499	203	830	138	537	8	387	810	471		0	92	54	65	57	74	51	207	2	13	99	8	27	79		73	151	2	609	109	174	918	368	40
	215	1084	438	249	488	286	1053	379	440	866	1085	13	307	943	1611		3	0	39	51	18	444	226	37	131	8	24	13	4	69		225	883	88	873	422	19	1325	116	1284
	846	1462	25	55	156	107	1238	84	6	563	494	38	331	1387	773		3	3	14	65	260	232	89	94	48	4	119	38	4	64		330	414	211	228	1063	134	832	21	977
	26	1789	11	59	146	1548	148	1405	177	15	484	4	222	1267	1160		70	16	1	120	42	227	22	151	165	0	8	4	1	86		361	164	387	34	1422	310	1393	4	627
	938	351	66	138	65	1530	838	1033	911	273	24	7	1755	581	945		23	51	0	10	87	137	47	244	27	4	44	7	53	99		36	533	227	983	265	84	1142	46	506
	1844	63	14	153	977	1360	360	209	714	937	516	62	1038	8	1262		23	1	9	9	68	16	47	35	50	20	0	62	56	23		136	238	12	840	85	15	81	541	584
	629	113	18	659	1261	1727	216	47	26	98	483	87	493	100	410		78	17	146	84	48	41	243	77	115	9	0	87	47	149		71	419	5	374	369	134	53	252	29
	105	1264	179	437	1233	2515	25	29	60	55	226	40	6	57	1296		1	0	20	47	61	25	167	6	21	14	26	40	33	17		80	981	8	3	0	340	519	94	23
	120	29	5	231	622	1634	40	132	20	141	114	0	177	804	447		4	15	64	34	26	16	25	25	26	0	26	0	0	71		84	707	17	63	561	495	372	14	15
	260	4	0	254	7	1598	78	1122	30	317	149	8	767	721	12		32	84	77	3	33	105	3	187	121	0	3	8	43	56		500	208	2	79	1044	136	138	4	247
	142	36	28	339	82	501	167	1332	1062	502	789	25	204	2210	17		1	26	37	7	91	214	97	138	83	63	8	25	18	70		17	68	96	23	123	5	303	64	52
	617	1521	65	126	149	104	1305	46	231	53	595	20	97	566	346		45	2	12	99	103	175	256	32	41	52	19	20	9	66		6	34	378	220	55	15	1723	6	9
	759	471	796	133	42	13	51	11	31	502	684	24	299	112	19		5	3	4	36	15	15	64	171	70	1	94	24	110	91		160	11	234	36	117	16	796	182	13
	131	1	1069	266	22	19	168	26	12	450	250	22	307	215	209		115	15	53	22	82	25	2	6	35	2	82	22	37	1		220	74	243	295	132	187	94	41	117
	109	2	162	200	424	363	119	31	208	15	42	4	93	101	1453		6	62	86	32	532	72	128	96	160	0	161	4	20	0		131	150	8	513	51	10	259	40	794
	272	78	9	85	51	6	149	6	288	108	251	24	453	341	1618		48	9	122	75	218	96	145	99	73	0	28	24	5	1		277	18	14	290	80	3	181	77	325
	1047	56	76	85	16	16	130	462	49	614	368	32	291	612	738		0	87	74	45	111	84	125	175	26	13	57	32	18	85		32	149	9	66	320	0	604	219	28
	1286	115	119	826	8	52	117	581	80	104	880	27	918	104	132		24	8	77	196	188	169	5	168	40	0	12	27	72	19		320	271	13	815	215	94	1129	349	33
	39	868	5	91	141	81	135	5	712	115	701	34	193	925	36		15	11	25	168	201	462	41	42	36	38	27	34	120	64		383	451	97	423	179	1	31	28	134
	178	4	557	169	159	618	1366	58	172	641	774	40	436	796	151		167	6	18	39	252	171	109	12	158	52	57	40	7	107		64	701	11	333	742	105	285	48	1158
	1400	458	914	195	777	46	211	142	392	891	308	49	1173	393	1560		14	101	0	14	12	15	109	49	46	3	35	49	0	34		406	383	35	88	940	214	529	137	475
	1680	763	1204	70	43	861	2	385	904	23	557	44	504	347	432		12	17	39	87	11	43	290	227	111	19	81	44	39	0		476	571	347	1024	148	39	329	178	787
	407	1552	871	362	173	712	74	207	238	1228	535	62	519	406	395		75	41	62	91	71	291	261	7	102	0	109	62	27	1		298	419	172	764	21	349	973	60	821
	146	1433	45	397	497	303	289	263	16	775	827	63	648	1468	1755		38	27	110	162	64	316	83	12	70	0	44	63	11	46		496	293	11	673	372	111	2187	202	915
	1551	1183	21	237	830	14	8	461	873	779	750	89	281	944	1496		22	64	63	159	0	456	202	108	58	0	82	89	181	167		385	425	246	1721	585	12	509	257	779
	1595	1008	18	31	261	266	58	1874	997	97	985	0	28	999	797		0	100	154	68	0	161	0	196	191	45	0	0	18	81		321	864	380	511	1046	221	410	210	843
8h	1011	398	476	88	945	944	111	799	293	150	577	0	14	1124	711	8h	74	11	18	13	3	16	8	59	4	28	33	0	4	4	8h	61	579	387	366	307	109	57	17	33
	46	4	1005	125	742	1160	678	342	5	1197	45	0	51	63	785		38	15	5	67	42	174	16	24	95	0	42	0	11	11		17	236	14	12	1	241	247	35	11
	18	7	846	134	567	341	297	9	20	554	13	24	703	2	2		94	2	5	137	11	237	84	61	44	0	0	24	19	26		225	2	2	60	128	107	1022	96	5
	55	436	294	112	390	88	13	231	112	224	12	38	1334	181	23		0	31	2	196	2	17	3	12	117	0	1	38	21	2		162	25	100	248	106	52	21	42	73
	90	618	1	24	9	4	1	332	17	1	15	6	328	7	430		0	0	49	6	28	5	93	5	89	0	34	6	2	4		1	109	200	91	14	0	609	14	119
	42	826	1	141	266	13	6	1	624	1	15	1	12	37	1181		67	24	0	1	4	45	7	86	4	13	12	1	0	80		63	69	5	19	4	5	111	51	20
	137	2	11	124	10	61	168	12	124	0	87	5	8	41	466		2	117	10	11	0	3	113	8	63	0	6	5	12	2		55	14	32	277	287	262	84	122	13
	629	5	7	13	3	137	164	11	13	24	156	16	6	27	41		23	12	77	7	0	35	2	5	37	0	71	16	59	98		107	0	264	334	147	193	355	7	97
	1	12	37	17	109	7	13	10	3	0	31	0	82	13	13		74	14	33	15	4	23	30	23	114	0	73	0	61	63		0	315	12	21	8	9	1416	13	41
	23	62	346	0	3	35	10	294	4	113	63	47	135	35	2		8	0	9	8	36	3	107	5	197	11	3	47	29	2		72	490	6	18	23	1	187	60	3
	110	808	10	7	9	105	0	796	168	126	135	55	5	4	20		18	1	4	5	22	20	146	0	10	5	7	55	2	4		248	54	5	73	19	4	35	126	23
	19	129	8	3	491	15	0	138	62	5	4	8	29	5	131		25	26	2	94	0	2	173	2	2	0	33	8	170	28		493	32	124	65	34	210	7	77	407
	27	2	21	74	511	899	858	22	27	66	29	3	986	137	872		11	1	42	112	17	217	114	47	33	1	5	3	24	31		20	18	86	99	393	3	157	3	768
	161	15	17	0	14	104	187	161	41	273	25	1	20	935	1435		94	19	7	31	0	296	7	36	19	0	50	1	29	44		24	61	0	16	176	3	297	38	288
	850	103	82	5	56	10	1	5	487	4	109	24	12	1378	695		26	45	4	1	37	32	48	151	69	3	83	24	24	17		89	13	9	44	13	14	11	173	13
	746	4	1	14	48	111	47	57	24	2	73	61	136	91	14		11	114	1	23	37	34	56	1	135	10	181	61	14	1		10	1	39	496	2	23	73	8	7
	79	453	3	6	103	29	19	113	11	1	23	98	0	8	24		4	20	5	1	37	20	199	13	33	5	16	98	66	3		169	157	77	231	28	113	335	0	11
	14	558	0	19	57	31	157	6	20	3	243	8	23	12	4		3	13	0	1	148	5	2	35	42	0	3	8	33	50		3	516	2	23	1	2	198	157	49
	2	0	116	163	36	277	7	31	25	30	284	3	26	1	23		70	1	41	18	25	34	2	6	46	0	16	3	23	156		28	29	35	22	5	6	40	136	14
	119	3	1066	28	58	279	78	208	348	86	162	13	55	44	4		33	15	48	0	0	364	0	4	51	13	21	13	7	88		134	0	216	22	408	3	14	5	17
	52	23	230	2	152	8	22	1	3	14	255	12	2	98	347		42	21	113	76	11	40	2	29	162	54	12	12	0	61		4	8	7	142	181	101	84	4	22
	272	27	8	8	1	9	38	9	14	7	13	11	3	10	411		20	15	17	120	4	18	10	37	153	5	1	11	99	1		1	11	11	146	18	48	188	20	24
	32	0	10	16	62	16	30	203	33	5	8	1	18	5	22		7	0	3	114	3	68	110	9	44	27	0	1	189	2		170	7	5	34	1	5	54	29	244
	11	52	3	27	87	178	20	218	17	357	34	10	97	10	4		0	1	16	9	34	0	25	0	27	0	11	10	40	0		177	58	20	124	6	14	125	126	4
	16	255	2	8	47	6	167	13	7	10	82	47	7	9	2		52	23	83	127	78	26	3	18	50	1	86	47	3	122		1	93	127	31	69	15	43	2	13
	41	5	92	4	68	15	23	5	217	7	35	36	13	25	12		44	6	42	9	0	139	0	19	31	9	95	36	41	4		9	33	1	41	26	12	21	6	10
	77	6	1	163	122	15	12	4	30	0	6	0	333	9	28		30	5	4	2	21	154	50	11	72	71	24	0	29	0		40	27	19	121	11	4	55	4	10
	95	8	47	266	1	15	15	39	11	55	173	3	373	94	298		88	61	0	0	1	16	1	11	62	33	1	3	7	6		84	6	6	21	6	5	53	3	20
	648	59	0	41	111	89	54	248	12	39	59	5	68	2	16		95	74	4	33	6	25	14	171	42	0	66	5	6	119		266	154	5	28	39	4	91	9	59
	123	0	1	18	29	755	296	115	20	83	16	31	481	533	1008		31	12	15	10	0	108	136	0	110	0	21	31	114	149		15	401	3	113	557	163	1015	420	952
	15	60	73	16	4	437	89	1	45	749	40	27	16	87	730		0	1	5	6	0	6	91	0	51	17	28	27	112	44		6	352	11	424	107	394	143	92	346
	18	685	162	189	148	53	12	7	21	421	11	0	6	18	192		7	0	0	43	4	24	12	9	19	0	6	0	73	0		74	0	160	313	13	65	36	31	9
	29	377	0	73	0	10	69	8	482	334	532	53	13	7	26		3	55	68	45	42	200	8	0	54	55	79	53	0	1		127	12	461	32	47	474	338	5	24
	130	7	11	6	0	2	11	332	49	103	386	48	35	60	33		10	55	81	0	49	76	54	4	46	57	134	48	7	0		435	0	290	21	29	45	188	15	18
	505	12	2	24	155	21	32	26	24	8	72	6	13	25	8		50	59	134	1	100	1	39	33	92	40	135	6	11	28		20	7	3	394	187	3	149	113	10
	645	24	377	25	0	201	212	772	672	0	5	14	1	6	222		23	3	91	64	40	0	0	11	48	12	146	14	8	82		5	20	2	95	0	3	98	172	258
	48	8	399	117	20	162	34	53	132	4	23	22	29	12	55		77	1	10	8	1	42	6	38	166	0	94	22	8	139		2	14	56	8	16	8	100	35	254
	2	17	0	100	418	1	7	9	4	33	358	0	33	43	4		11	13	43	11	1	37	0	86	67	8	4	0	57	24		24	229	161	84	111	141	176	2	33
	8	219	8	138	1248	92	14	72	13	222	103	0	12	1	39		71	96	1	33	5	1	3	9	44	10	1	0	87	2		80	164	129	87	115	86	88	24	17
	345	2	1	10	83	220	21	70	27	8	17	22	137	43	192		46	62	50	105	10	28	79	17	18	91	33	22	77	1		52	0	0	30	8	24	83	55	11
20h	17	15	212	131	3	108	336	33	252	1	63	50	34	103	1649	20h	85	4	56	130	84	164	101	60	116	68	135	50	46	93	20h	170	3	61	202	23	31	192	144	143
	326	53	93	63	250	310	222	357	51	96	719	8	15	305	176		81	37	156	90	20	281	18	45	160	8	37	8	19	36		3	34	86	606	107	183	925	31	27
	569	1079	379	642	209	489	18	260	172	4	95	28	302	995	243		98	59	171	29	133	24	4	12	140	8	77	28	31	1		143	303	821	58	6	54	204	132	1941
	437	2280	341	292	6	1307	145	667	889	96	435	2	1255	1747	316		98	89	85	16	100	35	0	132	41	17	66	2	308	7		232	265	305	593	159	800	175	288	1320
	2015	1284	1126	179	128	191	25	156	390	1432	149	1	44	315	435		33	71	132	6	74	5	125	263	20	85	172	1	122	162		198	24	8	99	1710	28	935	90	1266
	1218	34	197	664	611	1520	61	39	56	372	720	68	23	539	604		153	5	145	103	31	5	40	126	112	59	87	68	126	43		111	142	341	118	229	12	353	121	416
	85	33	821	253	1440	569	61	488	26	44	403	13	204	96	319		82	2	42	203	59	35	124	252	0	4	3	13	108	1		99	444	524	459	59	24	178	101	19
	255	1920	335	125	1440	25	68	585	573	113	159	14	10	301	95		1	11	155	4	29	239	322	197	0	0	109	14	28	45		241	419	57	492	88	496	184	16	22
	902	466	1362	260	437	43	99	158	599	571	124	5	97	1038	895		26	67	158	68	35	286	60	215	195	18	62	5	67	139		265	101	8	80	387	72	227	7	468
	52	727	1036	132	683	61	232	349	17	11	404	22	1361	216	1063		117	18	183	35	50	67	26	191	180	65	10	22	172	80		45	132	4	281	253	7	913	11	1559
	129	106	81	180	9	1141	1500	58	132	109	486	34	51	11	443		65	10	27	130	82	128	124	100	29	0	158	34	98	40		112	620	161	369	299	163	751	108	602
	884	9	392	573	432	1784	540	460	15	934	771	11	34	30	23		73	8	40	7	14	436	135	241	2	13	142	11	137	79		198	253	711	346	1969	251	31	357	143
	1596	210	30	421	1311	859	1655	1302	296	3	122	9	40	184	89		1	4	106	104	83	172	96	158	0	43	107	9	77	97		13	585	95	690	1190	9	141	57	19
	194	1897	358	272	1162	300	661	548	1105	24	105	3	192	290	898		18	106	110	65	115	56	87	106	14	54	91	3	7	20		81	338	20	98	886	696	243	61	174
	248	1705	1425	119	1167	63	778	192	426	1088	775	33	953	244	715		17	43	60	0	69	171	248	3	77	4	57	33	33	1		38	541	13	162	53	402	1497	141	1735
	125	114	523	253	877	400	132	389	418	1471	39	5	579	76	903		61	2	42	131	64	128	14	168	17	5	85	5	0	0		455	225	115	38	40	97	210	113	1280
	318	371	102	27	162	446	62	145	14	512	1251	48	199	146	83		23	10	29	31	42	107	14	51	88	3	3	48	89	12		26	951	419	1143	180	265	163	153	936
	2070	1281	26	2	14	2097	948	163	52	6	851	28	96	1711	33		0	4	25	73	154	329	29	191	2	41	12	28	66	60		170	388	645	795	763	15	623	0	600
	627	1383	122	114	467	1660	1032	1159	378	30	955	2	139	980	1078		101	71	144	15	127	233	98	195	3	0	9	2	103	7		179	384	23	898	952	0	330	15	1122
	127	431	898	190	486	1636	68	1787	1079	1257	705	6	814	775	607		8	20	110	31	70	7	138	19	2	1	8	6	165	4		20	409	8	701	451	246	75	1	240
	185	1	1017	378	23	1097	68	691	453	834	264	2	470	1630	54		29	23	8	111	78	8	40	20	105	11	3	2	32	0		165	147	16	312	164	302	159	105	19
	189	19	344	643	22	637	188	62	644	33	27	10	514	496	156		102	2	0	117	0	73	12	223	21	51	21	10	261	39		118	369	4	17	50	235	332	258	265
	1942	257	14	19	1182	1438	739	54	4	63	165	8	7	37	1439		14	14	29	129	29	11	6	176	18	5	90	8	226	112		381	865	384	55	151	8	351	27	1217
	1284	1713	2	261	1074	2345	421	535	381	1128	759	6	31	102	2212		75	76	6	63	1	150	90	158	63	5	121	6	41	105		109	261	34	2	127	4	351	11	177
	739	845	1	81	959	1416	79	1199	562	466	669	51	18	535	832		17	21	5	44	51	261	89	9	47	6	59	51	51	103		47	19	11	161	592	5	32	3	77
	50	1	96	406	314	1529	150	152	149	10	287	41	61	675	317		9	11	2	0	14	62	282	64	10	49	42	41	33	25		62	261	15	46	1174	14	32	15	36
	108	12	1	90	51	481	122	7	22	84	38	41	20	25	10		6	24	92	3	24	8	47	5	19	59	0	41	35	4		40	296	9	697	167	71	141	50	7
	165	322	17	5	127	115	197	68	146	181	49	2	909	63	30		9	75	100	57	28	4	4	71	114	26	0	2	18	0		148	666	185	36	50	7	177	32	33
	271	976	4	21	64	36	212	519	386	362	396	26	37	629	48		27	79	98	0	22	87	68	306	0	81	0	26	98	61		250	35	651	269	205	2	311	213	1725
	229	77	23	99	92	180	383	753	29	454	237	99	38	559	405		0	23	12	11	86	55	141	112	20	1	94	99	34	62		164	197	30	206	129	97	55	25	202
	226	973	128	11	27	73	162	88	58	151	433	4	127	129	31		45	6	1	69	115	160	134	200	96	16	2	4	34	77		87	339	12	178	120	1	33	67	45
	1069	131	420	14	124	1100	816	28	66	121	112	142	170	270	110		22	22	7	170	127	555	125	127	50	0	0	142	15	7		266	243	12	892	959	9	38	0	614
	741	1095	403	147	147	897	286	9	857	210	593	40	539	1226	590		103	34	50	5	92	110	88	11	13	2	4	40	42	7		462	590	7	65	1324	180	171	7	433
	148	1902	193	51	448	43	140	554	573	454	104	10	66	633	255		39	44	29	108	108	41	63	45	0	0	88	10	1	14		326	552	13	467	181	248	261	55	24
	1219	62	522	50	1205	144	191	196	74	97	360	10	127	394	255		0	15	17	60	60	32	4	13	46	37	52	10	0	93		463	948	6	702	645	4	20	75	1407
	436	956	68	317	658	1345	570	40	549	804	175	9	352	690	468		55	32	110	128	32	419	111	206	72	0	97	9	93	163		579	1067	211	415	745	52	236	54	851
	1200	1565	983	120	45	1701	36	521	67	400	1345	10	190	81	417		10	54	145	16	0	290	142	92	6	15	26	10	5	62		12	843	456	544	29	116	117	243	936
	955	391	1058	256	117	985	256	479	972	500	642	39	613	347	1108		22	33	38	225	14	256	70	324	8	2	119	39	43	3		112	1041	356	638	410	353	129	94	1335
	65	1	713	243	1359	1110	150	221	553	17	138	8	519	1128	267		97	49	103	48	35	274	13	139	104	44	9	8	50	2		697	700	97	616	1591	158	716	139	837
	365	4	78	224	1297	476	138	25	794	268	15	8	155	784	166		12	30	74	140	7	137	4	7	37	0	0	8	0	40		702	195	16	320	213	78	475	1	783
8h	732	25	10	34	2244	29	547	874	918	47	19	10	457	421	909	8h	72	91	19	6	30	131	9	29	7	0	2	10	0	61	8h	651	3	32	26	46	174	131	0	19
	15	198	8	759	346	8	357	1562	54	525	105	48	92	8	583		39	14	11	0	9	65	36	71	76	0	0	48	54	2		44	16	399	290	137	262	136	160	3
	93	2	7	585	21	86	10	187	22	886	53	34	21	8	32		4	0	5	84	3	1	14	44	41	0	2	34	23	0		2	19	194	28	361	315	136	91	4
	36	6	5	13	109	379	0	0	14	967	30	1	152	13	16		7	15	2	106	0	17	8	0	37	0	0	1	0	0		205	174	0	26	20	21	872	156	98
	328	352	9	17	122	10	30	122	9	20	251	35	578	89	321		84	7	15	24	6	105	0	9	39	42	16	35	0	22		60	40	2	233	37	10	202	71	974
	379	683	30	55	3	1	138	0	300	0	248	70	783	461	531		12	55	1	0	0	11	0	73	103	0	1	70	4	69		7	36	64	30	14	3	222	28	711
	8	450	610	5	56	62	9	67	64	12	175	5	12	8	838		29	34	2	0	14	49	11	50	6	0	7	5	1	33		8	6	423	23	42	0	78	45	15
	25	0	24	16	21	19	8	205	10	0	480	13	6	22	897		25	2	5	23	2	10	1	0	48	0	1	13	106	10		7	76	468	127	11	67	249	17	8
	50	9	5	134	130	3	18	167	36	26	366	29	0	6	471		53	3	29	88	2	88	0	0	61	2	0	29	13	10		165	15	24	12	27	15	764	132	16
	190	2	0	155	53	31	679	3	284	214	25	45	7	29	1		0	2	14	85	3	71	108	8	6	3	4	45	19	11		258	29	1	4	320	0	363	233	13
	615	8	19	11	3	2771	99	3	28	5	32	91	72	118	2		0	1	3	6	4	14	66	22	78	0	30	91	50	39		9	2	7	27	8	174	40	1	39
	15	25	30	23	154	1244	4	571	6	3	95	0	12	37	8		9	4	5	9	5	13	64	8	5	4	36	0	14	0		38	77	14	30	3	120	16	10	2
	25	368	11	0	667	153	113	32	20	24	177	28	0	16	35		10	3	1	0	57	1	0	20	8	0	195	28	36	22		93	350	5	113	42	8	6	66	8
	21	4	10	1005	62	15	18	16	13	4	19	78	118	23	275		18	84	1	43	43	112	9	1	60	0	90	78	6	24		222	32	71	3	11	0	83	49	26
	7	3	5	359	3	92	1	174	220	4	174	9	55	37	719		22	102	31	84	20	1	10	0	22	0	37	9	3	29		200	3	345	55	14	9	382	1	410
	90	2	1	23	13	1399	7	36	8	53	117	4	5	9	1		0	1	105	1	0	0	25	79	107	37	37	4	5	59		30	12	24	86	123	100	35	17	91
	16	2	8	8	3	0	1	1	9	1010	235	96	11	274	22		5	3	94	2	35	192	145	30	6	0	27	96	10	1		44	33	15	1	39	7	44	21	3
	63	71	914	24	1	11	53	62	60	183	506	45	6	1179	10		69	21	19	0	25	106	67	116	2	0	36	45	2	7		1	39	19	77	4	9	36	78	17
	221	19	2132	3	178	2	41	17	74	3	100	3	1	766	21		77	6	13	47	4	209	7	0	32	4	52	3	4	36		164	13	8	33	606	3	11	3	24
	5	122	604	0	7	3	15	120	50	0	37	63	46	27	13		170	17	7	82	8	43	16	5	16	4	8	63	6	43		182	15	10	3	124	107	97	2	89
	101	547	159	37	13	100	61	316	5	73	8	2	102	11	8		4	16	0	32	38	1	1	29	15	0	35	2	38	20		14	7	98	55	17	7	921	4	225
	46	0	6	117	41	912	1	22	277	3	34	2	97	22	32		7	70	2	0	71	14	0	13	56	0	161	2	42	65		4	214	9	10	9	9	124	0	5
	763	2	7	14	8	55	1	22	29	24	107	0	49	46	582		16	59	9	0	0	21	35	5	51	6	9	0	10	6		1	19	9	29	4	104	12	4	10
	68	2	6	32	25	9	159	0	24	157	55	21	20	12	89		31	1	15	0	0	10	92	0	15	60	205	21	7	18		18	21	22	29	156	10	98	4	19
	20	11	0	207	60	6	0	114	31	0	337	2	84	14	14		34	5	56	37	1	129	104	56	6	0	75	2	58	9		160	4	98	157	7	1	80	148	9
	1	10	2	590	11	4	11	134	33	11	27	26	112	5	12		116	7	116	11	49	98	1	33	11	6	0	26	37	3		0	9	6	35	1	7	38	67	1
	62	178	157	50	290	65	4	6	32	7	26	55	12	6	6		130	25	0	0	93	340	7	112	15	0	0	55	33	51		97	37	17	8	8	5	19	88	356
	82	244	9	11	760	339	128	16	15	521	39	2	1	4	14		66	26	2	35	8	7	9	32	39	0	6	2	2	91		228	185	14	17	24	99	370	271	518
	149	5	2	2	29	17	44	31	43	26	5	3	15	83	15		15	14	6	193	0	2	3	20	24	0	2	3	13	32		390	24	2	46	0	96	678	32	10
	33	1	14	1	7	10	4	200	15	2	14	8	0	85	101		6	70	16	105	0	30	0	15	88	10	1	8	2	12		14	31	157	132	187	13	925	7	5
	23	20	3	9	4	15	31	558	493	4	123	26	132	4	270		161	42	12	107	1	59	115	1	33	49	0	26	0	5		10	23	36	398	282	25	786	86	4
	55	5	1	34	56	17	443	381	407	62	378	58	0	108	24		9	15	2	9	50	28	98	0	73	8	8	58	2	114		96	48	1	65	14	28	27	144	14
	156	0	48	10	37	91	91	7	59	134	266	13	6	12	29		87	10	0	11	18	223	26	39	24	11	137	13	0	53		118	273	2	34	4	1	19	31	6
	771	807	672	350	12	946	3	19	9	3	34	5	39	0	14		36	8	38	1	51	88	2	44	12	5	45	5	95	39		350	397	6	5	14	110	13	1	73
	354	812	45	441	19	1025	1	5	17	285	610	59	121	6	178		128	58	74	0	21	10	47	6	90	47	205	59	31	3		150	22	42	84	99	283	46	24	783
	36	24	8	20	15	47	3	66	37	148	408	34	2	3	369		8	8	16	0	122	8	127	5	22	0	136	34	20	0		0	29	255	327	718	292	360	9	330
	18	3	7	15	91	0	39	658	386	3	63	108	146	56	205		16	23	55	74	55	2	47	25	31	0	15	108	2	1		23	27	169	216	69	108	229	30	9
	42	11	17	109	570	70	6	32	56	0	29	13	524	891	555		105	92	1	5	31	66	1	15	14	0	23	13	39	72		37	6	0	38	14	2	530	308	917
	875	663	534	328	363	72	73	9	6	0	7	1	6	345	2		124	85	0	36	3	11	0	90	15	54	7	1	0	58		141	192	223	49	17	15	10	234	163
	481	808	106	56	15	1498	159	49	7	146	13	11	9	46	72		153	41	9	29	13	16	12	4	75	4	94	11	20	66		511	653	156	16	30	53	26	3	157
20h	32	60	58	27	12	1911	22	328	101	41	55	9	16	9	470	20h	5	25	9	20	31	144	0	78	35	19	172	9	0	46	20h	95	59	86	189	33	8	185	95	1
	231	20	35	19	34	12	16	50	191	0	537	0	148	50	125		116	9	57	2	305	157	68	97	17	24	244	0	50	0		30	71	263	245	45	305	886	112	35
	768	1065	90	682	505	125	207	255	1373	10	870	19	65	349	207		79	33	55	10	160	248	146	67	94	2	141	19	42	0		23	78	109	538	164	190	806	306	609
	211	589	402	778	678	2016	212	624	791	145	153	48	251	979	131		138	96	97	2	101	70	41	262	62	67	122	48	7	3		262	595	524	659	47	0	355	202	750
	710	1131	140	497	155	1163	48	478	338	5	16	2	488	515	915		114	14	170	23	183	1	7	116	27	8	3	2	1	27		443	111	167	54	731	242	646	158	779
	1002	22	456	478	198	155	258	381	62	597	438	40	362	37	735		72	18	142	155	62	64	116	334	3	2	98	40	173	105		143	264	2	336	1043	120	715	194	429
	265	15	55	341	86	1473	36	159	68	399	258	140	13	355	570		16	10	13	66	226	340	210	271	77	2	140	140	38	10		101	323	95	464	1280	2	442	5	1152
	254	929	230	50	422	1976	177	234	664	186	111	46	76	43	529		3	106	60	2	219	298	70	283	42	3	21	46	74	2		241	273	36	283	134	93	268	219	40
	222	2534	603	28	2036	47	93	106	792	10	49	0	681	24	262		49	2	58	1	195	284	453	165	30	9	111	0	111	43		8	442	10	611	145	132	289	274	298
	1951	338	642	423	790	1396	1158	1251	65	54	626	40	151	140	62		133	0	166	66	195	103	147	225	87	71	88	40	12	38		323	537	4	227	178	3	164	4	1219
	432	0	142	484	297	856	79	1104	58	294	677	37	125	1065	891		37	69	240	11	161	136	115	208	23	4	111	37	55	35		314	135	378	369	1003	215	320	143	379
	291	87	808	232	124	34	720	918	611	1685	644	3	147	83	131		82	17	95	3	279	500	34	98	5	0	30	3	27	120		245	438	219	566	1151	583	870	273	74
	580	56	67	46	104	188	1232	52	975	308	415	75	273	213	97		0	101	130	65	168	254	48	110	8	14	74	75	30	53		12	676	5	412	683	1036	166	234	1298
	169	98	1047	346	368	91	243	648	884	551	24	96	770	154	625		8	49	77	100	208	74	133	333	11	58	94	96	8	0		137	211	99	231	21	184	130	43	256
	742	187	941	406	1870	1991	1647	1532	131	14	372	0	693	864	840		112	12	25	0	163	34	504	87	40	9	164	0	2	1		308	429	175	1240	11	17	291	14	500
	248	2306	154	258	1321	119	300	325	49	9	292	20	87	1798	109		0	7	2	16	149	333	31	9	26	2	95	20	121	0		13	594	652	591	262	9	220	1	608
	1203	441	30	27	765	1360	65	165	235	190	843	11	159	1139	578		4	22	11	74	77	312	28	10	59	1	27	11	48	113		83	549	501	1128	687	213	26	261	291
	1969	6	31	19	1923	1641	59	350	464	85	955	11	160	841	1348		1	93	10	40	164	46	8	11	33	42	41	11	47	109		126	739	76	504	820	383	338	202	776
	838	333	547	3	1097	1057	157	608	774	430	631	53	1235	100	164		28	18	28	0	13	20	30	130	2	0	14	53	23	25		410	495	1	399	35	109	623	3	1190
	112	1641	287	261	780	719	1182	1726	699	1628	1073	93	429	10	134		11	3	2	1	80	5	82	88	59	6	14	93	1	45		226	499	11	40	93	89	1153	64	194
	254	1130	1172	262	31	63	418	1539	59	607	233	13	165	49	482		223	0	0	32	43	105	170	80	14	3	55	13	8	1		13	509	18	191	1338	3	178	136	35
	1594	1091	509	53	46	15	38	627	20	13	21	40	25	20	487		0	5	4	25	45	32	23	115	27	62	127	40	4	7		40	231	318	82	444	23	67	9	1533
	602	8	9	17	86	2216	61	17	663	57	117	48	216	96	182		0	11	90	150	40	226	15	27	28	8	60	48	111	50		612	676	791	147	20	55	60	34	257
	140	3	49	498	91	1047	231	22	558	351	17	18	14	230	149		0	69	57	54	111	452	145	26	66	10	2	18	19	167		215	55	232	381	298	86	7	15	18
	209	681	62	406	289	27	128	91	246	33	99	0	234	229	517		88	57	37	5	84	24	231	24	19	0	7	0	5	93		3	138	579	460	22	81	110	114	169
	382	300	74	33	142	62	148	709	522	80	87	45	117	269	686		109	9	12	0	114	15	232	157	3	46	15	45	0	11		25	509	58	623	148	4	36	101	403
	375	10	288	85	228	227	795	129	24	1293	997	146	392	10	640		99	7	19	129	3	11	25	125	54	19	14	146	4	0		36	48	13	177	281	0	33	21	837
	701	67	278	613	48	981	1436	155	127	469	1040	70	112	442	450		44	25	0	18	38	7	20	171	7	31	49	70	19	0		50	260	12	63	1472	10	42	190	62
	86	1821	304	88	391	989	86	72	392	18	126	37	157	1650	132		12	74	16	0	126	98	11	29	35	33	116	37	33	16		243	304	22	88	649	11	238	2	18
	714	574	43	24	209	172	56	363	3	194	27	56	112	334	52		7	24	24	2	134	115	63	0	89	42	100	56	20	43		2	314	4	636	15	359	173	82	197
	511	4	138	37	55	23	106	1700	12	165	32	0	744	23	679		0	19	144	0	152	171	173	0	22	4	4	0	0	37		56	708	102	872	141	103	54	32	39
	1321	90	329	389	140	252	428	15	84	53	318	64	213	202	335		0	43	5	40	78	154	76	51	18	1	19	64	0	29		272	114	11	20	1050	15	172	51	626
	1238	671	196	99	292	233	638	16	389	274	152	21	69	184	25		10	51	39	74	1	34	36	8	18	15	6	21	26	2		167	264	36	527	589	32	132	176	92
	474	289	1255	13	211	931	91	874	652	44	2	14	549	205	274		7	115	136	15	76	17	228	125	19	3	5	14	64	9		173	731	66	898	311	5	24	190	350
	671	1212	231	132	321	1056	207	221	81	725	99	206	391	1106	359		7	35	39	64	64	40	73	87	1	0	64	206	32	32		392	536	229	1348	1298	122	17	20	1177
	857	774	1390	446	2082	208	240	116	533	214	172	31	147	705	49		16	31	131	3	2	160	302	166	71	0	57	31	34	115		585	819	348	623	2310	91	69	192	394
	1726	842	1695	101	1850	342	231	611	900	349	487	21	585	451	519		23	11	106	13	26	608	138	157	23	22	77	21	80	6		350	1261	17	872	1313	5	278	188	776
	1617	541	1110	754	2094	1120	232	30	677	673	481	49	786	670	523		22	105	139	5	1	397	26	14	25	21	65	49	91	48		289	1059	179	372	73	153	231	395	564
	601	19	253	316	1257	1147	648	1240	1032	8	147	16	357	84	971		18	51	22	58	0	186	6	44	70	32	17	16	48	82		677	454	195	905	20	152	831	222	388
	80	4	89	66	826	879	179	1655	1020	274	223	59	319	21	195		23	10	126	67	0	141	1	2	0	16	0	59	5	82		603	801	380	654	291	136	822	37	8
8h	307	7	1261	25	231	55	19	266	820	292	29	5	456	9	15	8h	0	28	24	51	3	17	26	2	9	0	0	5	9	70	8h	125	17	286	60	41	103	1025	10	13
	384	0	1936	7	10	3	37	19	1328	1	7	2	17	8	14		6	5	3	0	0	72	27	1	83	0	129	2	21	0		44	3	74	102	137	7	977	138	20
	194	580	631	17	63	37	46	2	863	7	108	9	26	766	249		2	73	0	0	0	81	139	66	27	0	67	9	25	0		175	30	133	64	37	131	1315	165	7
	257	664	30	6	801	140	244	246	46	172	8	52	67	632	985		41	82	18	44	11	58	32	17	0	0	1	52	2	0		366	519	3	31	12	16	1600	39	37
	118	11	5	56	2	42	17	31	11	2	12	67	20	263	138		165	73	0	20	2	11	0	30	5	0	0	67	0	10		34	75	167	170	366	1	494	22	521
	163	9	1	533	34	15	3	45	13	0	143	61	294	11	20		5	3	0	6	18	3	9	0	39	0	1	61	15	20		9	3	548	15	23	331	112	39	33
	107	1	0	258	4	76	0	2	2	6	338	24	44	5	15		0	7	41	1	33	18	20	10	8	3	1	24	39	1		129	2	183	64	7	323	399	260	16
	161	386	27	19	201	4	112	15	583	60	439	23	0	67	14		1	0	2	12	43	63	3	28	20	39	46	23	1	17		1	22	4	35	3	18	18	245	7
	69	612	1	1	439	655	414	395	46	181	126	19	19	164	269		1	0	30	121	11	69	91	0	21	2	39	19	7	20		66	363	8	40	898	15	395	5	50
	540	320	0	5	84	795	388	36	12	10	8	52	28	7	68		0	61	12	70	5	562	183	84	28	4	27	52	38	2		5	11	51	163	677	0	30	4	5
	40	0	27	26	128	209	14	13	9	0	3	18	8	10	298		6	7	44	37	76	476	126	79	3	6	30	18	52	0		11	8	16	74	106	64	28	16	22
	20	9	282	14	17	31	4	20	16	6	57	1	6	1	18		6	2	79	6	0	277	5	43	24	3	8	1	35	32		172	20	7	19	3	1	18	43	17
	8	1	14	13	10	31	3	163	20	86	36	0	115	238	10		26	0	20	3	2	52	22	7	11	6	1	0	8	10		78	8	263	82	7	5	13	261	7
	23	23	6	1	0	16	270	102	175	801	48	68	210	222	37		50	1	21	0	0	0	8	19	49	0	19	68	26	0		18	6	283	49	14	1	281	129	154
	12	2	0	11	243	268	15	1	60	600	73	144	3	8	29		0	2	8	0	133	157	1	43	0	0	5	144	60	1		6	12	135	31	1	37	31	9	244
	422	5	46	20	333	127	8	19	22	1486	47	2	6	27	279		10	15	5	0	128	101	89	62	4	0	12	2	12	15		113	48	3	184	6	231	950	3	1
	7	268	12	95	3	35	8	25	35	844	315	35	4	59	8		11	23	9	5	52	6	31	2	8	2	16	35	5	2		318	189	2	23	282	112	1527	4	17
	22	18	0	91	9	25	7	37	0	43	382	6	3	0	99		1	43	15	0	47	24	0	7	29	45	65	6	3	37		163	13	3	45	22	9	612	8	5
	24	20	203	6	6	1	94	76	244	3	25	4	4	56	155		2	0	1	63	0	30	10	3	9	2	71	4	19	21		2	19	4	136	13	15	7	10	12
	84	0	8	11	40	464	84	187	4	1	76	37	19	48	15		4	15	16	92	1	74	0	15	0	4	218	37	43	1		45	10	4	22	6	41	4	63	122
	393	26	0	17	29	581	14	56	3	3	1	0	197	36	16		30	29	4	88	1	217	28	7	69	3	154	0	35	5		10	98	24	5	38	5	26	174	18
	41	257	1	3	2	23	87	3	20	2	147	10	66	96	17		4	4	0	19	0	40	1	130	19	9	107	10	5	1		13	12	0	280	80	0	68	11	7
	21	5	44	222	29	18	2	26	25	569	21	35	3	0	14		51	0	68	4	0	1	0	55	50	0	10	35	0	25		12	14	10	26	3	95	11	1	177
	35	6	0	46	17	0	149	6	21	18	158	1	3	59	6		17	0	8	3	7	0	61	17	64	0	10	1	4	0		3	15	17	30	7	1	14	0	13
	14	14	22	25	43	5	21	11	41	7	99	0	12	23	0		0	22	83	9	2	0	97	9	77	0	10	0	21	77		246	93	154	43	159	16	344	5	10
	301	373	551	19	535	18	368	161	62	1	13	0	5	1	121		6	40	24	12	54	108	17	0	19	0	3	0	20	47		113	2	636	16	10	5	11	7	8
	106	44	397	9	16	16	5	0	16	1	4	30	139	69	665		10	15	13	5	45	107	92	60	17	1	1	30	1	0		24	0	16	24	14	6	5	9	3
	145	3	10	27	0	38	12	30	16	0	194	42	0	602	92		2	0	120	111	49	1	45	89	24	15	131	42	61	3		93	18	3	9	19	289	26	52	108
	17	12	1	11	19	314	41	77	17	2	13	3	2	347	13		17	12	3	168	0	4	9	61	21	24	11	3	38	86		6	30	4	19	2	47	3	243	480
	57	2	9	0	29	130	30	25	157	370	15	0	12	10	0		38	5	42	10	0	55	0	26	0	24	3	0	88	9		64	4	3	349	221	10	85	126	115
	951	6	4	103	42	26	3	55	144	59	17	0	2	6	27		111	0	3	12	68	21	1	27	83	0	13	0	6	60		326	412	3	465	380	10	848	15	2
	1097	10	18	690	307	15	35	189	24	6	39	2	30	0	9		0	43	4	12	14	20	45	20	48	0	10	2	1	32		233	674	74	45	3	19	184	11	12
	645	142	242	70	1	14	16	626	6	0	200	1	478	49	399		0	15	4	0	44	8	16	71	45	8	114	1	0	74		3	375	2	22	12	0	29	0	3
	108	2391	18	13	7	13	80	261	2	2	241	110	54	66	33		0	61	26	17	11	19	8	29	7	0	196	110	5	21		2	4	9	21	5	8	0	42	48
	24	525	0	11	26	168	7	15	52	33	277	59	17	3	53		2	0	2	13	1	276	0	19	12	5	67	59	0	77		8	20	232	30	77	42	69	227	12
	97	12	1	394	158	319	35	18	16	274	4	7	11	19	25		14	4	1	141	21	119	1	0	132	44	71	7	1	41		23	19	45	23	21	93	213	228	54
	96	0	14	700	13	10	107	45	25	68	279	83	1	86	185		34	60	56	6	42	7	18	74	203	35	2	83	20	9		109	14	2	215	14	159	6	82	605
	277	7	62	1214	4	14	13	66	328	2	189	3	13	361	820		96	45	34	99	29	10	164	6	49	46	0	3	14	16		252	85	6	122	127	0	50	37	440
	9	109	25	1202	58	85	10	570	742	1	24	2	92	5	274		43	19	107	1	167	4	151	35	55	1	2	2	101	150		27	4	76	475	211	15	91	130	20
	328	112	1	284	1155	412	97	73	483	94	13	121	115	0	11		24	47	40	2	118	79	0	63	41	0	69	121	12	58		0	4	176	165	6	67	23	66	13
20h	118	3	146	60	432	37	7	15	23	63	154	44	5	244	62	20h	4	23	61	0	0	18	6	64	10	1	216	44	25	0	20h	73	45	3	11	39	5	879	150	96
	330	189	310	208	0	52	16	13	5	3	222	17	62	863	391		15	44	0	47	76	47	50	145	78	48	37	17	1	0		79	483	139	306	192	445	140	258	1522
	1632	1750	139	139	779	230	177	317	373	61	104	59	1088	251	85		58	73	35	58	74	97	16	154	72	44	33	59	20	18		177	490	396	1035	2209	308	587	228	294
	424	1448	712	829	873	1464	38	891	77	871	516	101	455	1027	433		76	74	114	62	80	293	183	212	60	44	196	101	154	13		68	84	58	532	165	183	764	362	85
	182	1772	177	769	76	696	144	373	880	514	130	66	34	646	474		0	5	76	27	28	227	37	209	122	13	27	66	95	32		180	304	420	56	393	90	812	230	947
	1424	44	430	471	109	112	165	250	1153	22	86	48	121	41	672		2	54	17	102	98	2	9	321	16	71	102	48	86	64		275	379	234	444	322	19	43	142	832
	1070	82	1416	370	123	1925	253	475	349	1	931	4	409	183	866		66	35	57	1	108	106	201	406	21	46	111	4	1	13		232	118	233	261	513	18	76	275	42
	98	1830	8	96	1420	326	934	1289	380	186	905	65	111	1478	770		46	75	142	32	96	219	82	357	6	0	80	65	7	2		438	411	11	134	40	86	256	222	261
	163	1267	671	357	793	141	575	501	1196	462	322	41	252	396	94		14	26	97	4	61	16	301	276	80	60	174	41	56	104		48	401	25	181	808	383	133	143	918
	307	18	696	899	171	1398	1200	138	19	31	29	94	938	211	54		4	20	9	12	72	131	54	273	54	33	60	94	24	47		41	603	158	725	1351	68	127	154	527
	82	239	811	600	17	807	198	372	478	344	83	44	642	35	328		17	109	85	31	89	900	305	320	57	2	74	44	4	75		135	348	262	1045	1291	51	283	14	71
	1004	1619	826	53	531	32	156	747	101	569	85	2	49	43	78		20	107	27	59	124	393	515	211	2	2	66	2	51	135		249	350	39	587	502	191	307	115	21
	2287	1037	1403	216	1447	1342	63	2131	38	1243	487	61	90	1143	332		0	12	105	5	12	377	332	250	2	10	2	61	1	33		270	705	10	178	63	81	487	186	17
	1437	29	321	398	1386	763	222	303	1099	478	265	15	384	997	554		0	7	7	2	80	293	87	314	96	15	47	15	5	26		10	218	26	495	230	7	1120	202	698
	132	29	1089	615	1124	30	1102	194	339	11	287	107	195	249	610		0	41	6	42	46	502	1	36	84	8	32	107	37	83		247	812	181	543	1208	22	542	140	1121
	162	1195	543	1004	411	1657	165	577	118	213	312	123	503	34	332		0	73	42	65	53	475	1	171	58	65	66	123	22	153		99	336	91	1052	1510	528	461	35	937
	1332	703	171	351	214	481	104	1850	918	1873	75	33	616	428	235		2	62	25	168	97	4	35	3	60	56	88	33	43	120		0	509	230	616	1127	104	288	21	1262
	616	40	167	29	1360	110	120	1890	1041	1266	288	2	488	464	660		0	0	19	47	0	6	2	7	2	15	188	2	10	18		195	318	195	27	75	485	641	266	1836
	265	905	135	45	861	1429	573	218	679	780	156	33	3	1603	688		36	11	1	30	17	5	63	182	0	0	22	33	1	54		308	557	12	91	11	294	1649	383	1264
	52	1225	333	287	8	1259	1297	159	33	899	358	0	314	868	1003		0	0	16	71	85	8	1	225	0	0	40	0	12	1		19	808	14	111	118	182	1075	101	1536
	208	1676	1574	552	75	43	955	432	73	483	594	0	442	518	416		12	32	110	81	86	4	135	196	0	39	70	0	2	0		98	74	215	984	22	24	1526	13	1606
	683	317	567	296	724	22	79	1391	38	29	991	4	406	249	606		2	93	42	53	10	61	113	258	39	33	22	4	39	25		177	548	186	1292	291	2	556	7	992
	35	14	35	312	1283	18	54	205	198	0	1504	66	16	88	749		12	2	30	2	83	1	384	229	14	5	34	66	13	65		130	644	3	522	1871	11	19	15	772
	159	45	176	30	395	67	78	27	1106	92	492	33	77	1105	609		5	0	7	23	94	254	111	253	59	5	99	33	0	134		23	34	4	89	1334	52	35	13	366
	197	1870	197	16	19	1172	273	424	868	142	37	0	138	261	1230		15	12	2	41	69	1271	14	193	63	69	4	0	22	69		38	26	51	199	112	8	173	52	76
	233	647	54	284	30	336	28	576	28	197	130	6	781	17	36		65	20	17	0	103	42	14	154	17	4	1	6	85	85		44	4	10	275	32	22	11	143	36
	346	29	56	416	113	32	82	32	11	28	484	27	577	116	25		39	20	30	7	138	345	18	1	15	1	36	27	11	34		108	32	4	382	16	0	14	36	16
	1046	10	486	70	839	8	599	67	62	432	894	48	44	508	678		0	2	7	66	109	252	133	7	35	1	49	48	122	21		11	370	75	690	2	16	156	38	6
	214	141	38	496	63	21	249	24	22	77	302	1	250	1732	506		0	10	109	57	22	943	239	6	0	6	25	1	10	3		100	401	123	799	41	85	10	147	781
	327	1233	299	589	341	119	151	3	245	218	12	0	184	979	18		15	90	44	1	45	57	292	61	85	62	24	0	13	8		72	321	4	193	713	8	19	14	608
	507	1604	148	46	74	17	95	534	70	651	69	8	176	27	389		0	1	12	3	8	5	272	111	47	11	11	8	15	78		213	377	3	281	495	109	105	6	2
	401	7	626	40	222	295	966	526	397	565	230	19	186	64	89		4	27	55	92	73	5	293	148	50	10	69	19	1	5		212	356	16	366	55	32	0	187	6
	1197	492	961	83	2215	606	129	77	51	35	66	112	140	93	364		44	49	208	28	88	10	84	279	2	0	15	112	27	0		50	91	50	718	25	87	19	231	19
	658	1379	962	539	1055	32	68	9	801	105	537	3	599	985	469		120	73	5	67	105	478	25	305	5	60	159	3	33	0		254	421	13	235	734	70	27	59	333
	186	832	123	65	164	69	825	781	1143	173	79	8	724	348	650		178	4	21	48	96	291	3	10	65	2	17	8	67	8		311	111	65	941	803	17	174	218	686
	908	93	893	122	35	184	726	262	228	87	332	90	123	566	205		47	10	81	10	19	466	65	15	45	3	29	90	55	11		44	366	297	1175	52	114	585	180	882
	628	2087	1539	364	294	434	71	85	630	198	103	4	1137	1194	324		0	83	28	14	0	667	136	2	39	0	79	4	30	17		2	107	286	229	753	11	251	95	325
	113	777	787	520	1792	65	165	838	1231	595	323	0	411	751	539		0	9	24	12	0	192	169	0	41	0	57	0	1	39		596	513	3	375	789	198	21	235	7
	81	186	165	278	1263	282	66	2318	1194	944	1617	17	535	109	681		12	160	238	49	0	6	43	154	94	0	161	17	4	34		200	109	219	867	228	110	41	153	3
	448	2	34	282	925	15	163	1289	1962	867	376	111	490	4	511		16	29	82	7	0	9	7	104	8	43	167	111	34	73		330	599	439	1148	7	388	638	2	2
8h	768	1	9							66	23	5	10	10	557	8h	42	11									122	5	0	104	8h	142	435	616			95	698	32	71
	48	4	13							106	26	0	2	338	78		21	36									28	0	22	5		68	4	423			20	30	251	625
	27	8	420							88	169	3	3	770	36		0	84									17	3	0	54		178	23	95			9	11	11	140
	40	184	37							270	4	68	232	98	75		0	0									4	68	0	108		55	10	6			88	102	6	0
	14	1	5							0	72	12	680	12	274		0	6									13	12	0	78		20	5	9			146	5	3	0
	667	206	6							222	60	17	1	0	26		2	53									150	17	27	44		5	30	439			210	141	137	1
	35	258	0							614	3	1	6	9	463		0	84									9	1	0	31		16	6	0			8	752	80	0
	13	10	88							0	11	0	7	223	121		0	36									2	0	0	38		77	67	2			10	1203	24	13
	6	3	30							6	53	38	10	50	8		57	0									0	38	35	2		6	15	4			3	801	91	1
	121	3	0							1	365	29	78	1	14		41	0									92	29	42	36		96	103	2			71	44	95	22
	425	160	12							82	146	0	1	0	69		23	0									9	0	14	31		9	8	62			9	8	0	282
	60	643	2							57	91	0	15	19	95		0	32									16	0	9	66		32	21	3			0	11	0	111
	10	13	4							0	50	0	5	156	27		0	0									1	0	46	64		76	0	11			6	269	16	7
	1	0	14							3	3	83	76	1	95		0	16									116	83	8	88		38	1	3			8	240	77	5
	19	4	15							0	0	35	9	4	14		11	0									21	35	34	82		0	38	12			113	5	207	101
	22	0	14							225	52	22	6	0	54		0	0									18	22	36	0		77	87	49			11	23	73	20
	115	26	6							612	29	0	1	100	86		0	2									3	0	9	0		2	14	186			9	14	4	5
	137	97	430							4	25	0	39	54	387		2	16									3	0	16	13		0	7	26			9	29	12	19
	394	20	396							3	348	2	3	7	7		53	106									108	2	10	1		2	14	7			105	136	39	5
	36	38	14							11	80	0	0	8	30		7	2									31	0	0	7		107	3	3			0	25	27	14
	29	1	3							14	34	1	4	6	21		24	2									197	1	18	15		174	11	7			14	60	126	192
	9	114	1							85	15	17	34	79	9		0	6									180	17	19	8		59	77	16			18	50	160	8
	138	25	6							45	33	25	0	14	9		0	4									138	25	37	7		12	127	13			372	587	7	3
	77	0	15							11	22	10	2	0	2		0	57									122	10	4	1		3	6	15			29	35	7	88
	4	8	139							2	62	0	0	0	102		0	1									5	0	21	37		75	14	1			22	18	10	11
	74	3	2							2	56	1	88	5	238		0	3									0	1	29	40		95	3	145			2	12	4	385
	52	320	0							1	128	0	0	210	265		6	38									24	0	32	47		198	9	223			9	19	88	29
	510	1860	5							0	10	30	2	715	15		18	19									14	30	38	4		50	12	4			0	423	300	4
	803	1	11							17	13	79	577	409	844		30	2									34	79	79	97		5	6	8			2	866	149	658
	126	3	9							8	5	0	505	12	262		45	5									35	0	65	17		0	230	7			1	619	85	186
	23	2	685							5	97	0	27	6	18		78	47									77	0	20	24		39	214	10			11	57	3	34
	6	3	104							214	404	0	2	3	23		1	39									132	0	7	35		246	46	28			138	11	32	77
	21	201	3							388	167	20	3	7	1		0	0									101	20	0	0		25	6	0			90	214	7	42
	545	124	144							9	32	14	1	116	12		0	0									125	14	0	71		15	9	12			126	421	75	5
	256	634	391							0	25	85	142	16	260		83	72									1	85	0	37		412	406	425			28	967	175	176
	12	2	0							1	10	1	190	15	412		83	40									15	1	2	2		269	64	87			0	16	0	70
	7	27	9							8	18	11	29	0	212		51	0									45	11	26	0		59	0	9			22	17	3	32
	208	6	13							493	367	58	0	111	13		2	14									99	58	78	32		151	1	6			574	98	31	14
	216	61	96							115	24	14	3	127	4		21	26									201	14	6	19		26	80	27			161	613	126	298
	24	48	52							1	6	0	13	6	1		96	19									24	0	8	9		0	210	63			16	48	161	414
20h	58	1837	8							96	79	0	266	2	464	20h	113	10									10	0	0	76	20h	22	71	157			62	105	19	24
	325	320	159							2	366	0	2	675	70		25	74									103	0	5	112		35	139	65			201	1326	185	103
	388	65	431							79	208	14	432	769	569		0	24									140	14	44	65		99	359	249			42	1471	240	675
	236	1501	91							377	255	37	904	579	577		39	38									110	37	62	139		192	136	178			30	293	186	50
	35	1947	191							4	127	24	12	41	698		180	53									75	24	159	6		231	534	1			847	153	62	336
	142	208	961							182	126	0	58	290	324		45	3									135	0	11	38		28	128	159			205	299	176	229
	1153	24	228							88	110	23	551	483	151		11	7									77	23	57	9		0	251	320			42	334	468	23
	40	378	65							1041	244	37	935	153	664		18	83									26	37	32	14		196	129	97			53	133	280	25
	132	2205	581							612	95	29	130	892	403		0	49									110	29	152	2		76	387	11			43	418	190	256
	1723	106	252							62	593	31	8	1322	353		159	6									156	31	21	0		133	89	17			262	1703	55	106
	1140	49	502							17	171	0	247	481	546		43	6									67	0	140	0		222	484	197			331	759	399	455
	132	1258	591							18	191	1	930	139	851		31	66									5	1	1	1		1	317	45			40	120	55	324
	388	510	196							107	179	0	222	6	1109		0	38									66	0	61	27		52	510	20			92	1063	6	116
	307	3	1061							100	1533	26	196	170	314		6	2									149	26	1	0		240	157	215			166	1304	21	177
	34	136	538							1626	45	1	873	678	839		23	27									73	1	12	20		40	699	374			52	515	124	1021
	251	1475	952							578	343	18	745	44	209		0	11									3	18	60	11		142	266	36			387	231	191	128
	1470	1363	97							24	602	11	43	340	74		2	66									4	11	60	0		138	39	17			221	42	225	147
	545	662	183							11	573	12	313	584	445		0	27									113	12	32	2		72	721	8			81	163	78	36
	59	1179	59							15	76	0	903	329	674		56	10									69	0	58	0		150	257	209			0	1714	12	110
	44	1086	1152							1002	454	0	415	4	282		1	77									109	0	26	2		459	11	288			103	889	7	7
	296	63	1017							678	150	4	23	16	287		77	63									129	4	39	4		217	656	17			6	42	56	112
	41	12	368							888	415	9	93	66	258		11	7									28	9	28	81		235	551	419			549	71	112	28
	472	1802	389							115	482	1	716	646	258		1	12									0	1	0	79		1	919	426			594	321	59	418
	1380	1406	41							10	130	4	327	231	168		0	20									0	4	14	41		12	209	173			658	839	80	373
	654	446	211							14	50	34	64	69	669		0	17									21	34	0	8		13	24	16			683	1212	6	462
	101	8	206							35	380	0	39	192	195		3	0									15	0	0	11		98	1	4			263	52	85	11
	72	331	168							4	115	6	310	235	203		4	12									94	6	21	27		1	1	15			15	38	183	91
	40	24	412							154	125	2	37	108	518		69	80									51	2	10	0		5	52	25			1	89	11	25
	218	490	562							248	79	26	486	5	316		30	19									21	26	3	1		36	7	7			3	19	90	308
	208	2264	214							69	272	33	296	5	354		15	28									24	33	9	50		24	158	44			1	28	154	271
	299	17	196							537	149	10	151	113	391		0	78									20	10	1	8		119	571	9			0	265	78	11
	344	50	276							1360	557	6	119	124	101		0	4									112	6	21	17		99	138	73			157	28	142	23
	260	1275	182							6	197	5	440	392	218		0	2									16	5	18	5		159	2	44			15	354	112	310
	1177	117	182							89	68	2	293	1024	276		0	16									13	2	14	30		1	35	71			11	132	169	693
	1042	27	486							294	1084	17	409	576	130		38	32									24	17	93	59		143	571	515			58	287	182	52
	7	1380	794							783	147	12	775	363	215		0	119									133	12	44	56		139	124	174			10	1694	580	194
	462	1456	726							239	326	2	989	31	366		3	42									119	2	32	0		194	0	8			15	1259	10	210
	1162	1340	865							56	752	6	488	139	392		16	56									113	6	23	0		159	267	57			505	1040	13	961
	22	697	36							171	954	9	751	416	41		52	75									4	9	11	0		82	541	207			221	491	204	812
8h	11	1020	177							149	1041	1	144	756	17	8h	22	60									9	1		14	8h	17	1069	281			63	968	279	397
