# Supplementary material for: Long-term consequences of the absence of leptin signaling in early life
Source: eLife. 2019 Jan 29;8:e40970. doi: 10.7554/eLife.40970 (PMC6384028; doi:10.7554/eLife.40970)
Supplement: Figure 3—figure supplement 1—source data 1. [file elife-40970-fig3-figsupp1-data1.xlsx]

## Sheet: Fig S6A
Food intake in ad libitum (AL) and after 24h fast in adult male mice
Time	Ubi															Time	LepRNull										Time	Ubi-LepRNull
AL	3.3	3.7	3.9	3.5	3.8	4.1	4	3.9	3.9	4.4	4.3	4.1	4.1	4.5	3.6	AL	5.8	8.3	5.1	6.1	5.6	5.1	5.3	6.6	6.2	6.7	AL	4.2	4.3	4.2	4.6	4.1	3.5	5.6	4.5	4.2
4h	1.64	1.88	1.6	1.8	1.8	1.9	1.5	1.7	2	2.3	2	1.4	1.3	1.4	1.1	4h	1.7	2	1.5	1.8	1.9	1.52	1.91	2.1	1.6	0.7	4h	1.8	1.8	1.3	2.1	1.42	1.84	1.3	1.4	1.3
12h	2.97	3.14	3.2	3.8	3.1	2.6	2.7	2.7	3	3.2	3.7	2.8	2.4	2.9	2	12h	4.5	3.8	2.4	2.9	3.9	2.92	3.3	3.4	2.9	1.7	12h	2.9	2.9	2.1	3.7	2.6	3.26	2.1	2.2	2.6
24h	5.67	5.57	6.6	6.6	7	6.2	6.2	6.6	7	7.6	7.7	6.1	5.3	6.2	4.6	24h	9.4	9.3	6.7	8.7	8.3	6.9	8.42	7.8	6.1	5.1	24h	5.8	7.5	6.6	8.9	5.44	6.32	5.2	5.5	6
48h	9.84	10.39	12.1	10.7	12.4	12	11.2	11	12.2	13.3	12.4	10.4	9.7	10.3	8.5	48h	17.9	17.9	13.5	16.4	14.8	13.01	14.69	14.6	12	10.4	48h	11.2	13.4	11.2	16.2	10.86	11.92	9.5	10	11.2

## Sheet: Fig S6B
Food intake in ad libitum (AL) and after 24h fast in adult female mice
Time	Ubi																												Time	LepRNull												Time	Ubi-LepRNull
AL	3.4	3.3	5.6	4.2	6.8	5.2	4	4	5.6	4.2	3.7	4.5	4.5	3.9	3.9	3.4	3.6	3.6	3.9	3.6	4.7	3.1	3.5	2.9	3.3	2.3	2.9	3.4	AL	5.8	5.1	6.8	5.7	4.9	5.4	6	5.3	4.3	5.7	4	3.9	AL	3.5	3.5	4.5	4.5	2.5	3.7	2.4
4h	1.6	1.5	2.2	1.9	2.1	3	2.3	1.7	2.1	1.8	2	1.7	1.7	2.6	2.5	1.9	1.5	1.5	1.4	1.6	2	1.4	1.5	1.2	1.4	1.4	1.6	1.9	4h	1.9	1.7	1.7	1.5	0.7	1.3	1.1	1.2	1.7	1.6	1.6	1.3	4h	1.6	1.8	1.4	1.6	1.4	1.3	1.3
12h	3.4	2.8	3.2	3.2	3.8	5.1	3.8	3.5	5.6	3.5	2.9	2.8	2.7	4.1	4.6	3.8	2.6	2.6	2.5	2.9	3.1	2.9	3.2	2.4	2.3	2.4	2.8	3.4	12h	3.1	3.2	3.2	3.5	1.4	2.3	2	2.8	3.4	2.6	2.8	2.7	12h	2.7	2.8	2.7	2.7	2.3	2.6	2.4
24h	5.7	6.3	7.4	7.8	6.6	9.2	6	6.6	11	7	6.9	6.1	6.4	8.2	8.7	6.7	5.4	5.4	5.7	6.8	6.4	5.3	6	4.9	5.7	5.5	6.3	6.9	24h	9.1	6.9	7.5	7.5	3.2	6.2	5	6.2	6.8	6.5	5.8	5.3	24h	5.7	7.6	6.5	6.2	5.4	6.3	5.2
48h	11.3	10.6	13.2	14.2	10.7	15.4	11.8	11.1	21.5	11.7	10.7	10.6	11.4	13.5	14.9	11.4	9.4	9.8	9.4	12.6	11	10.2	11	9.4	10.7	9.9	11.1	11.6	48h	18.4	12.4	13.2	14.2	7.2	11.5	10.2	11.9	13	14.4	11.2	9.2	48h	10.9	12.7	11.3	11.6	9	12	9.4
[truncated: 1 more columns]
