# Supplementary material for: Long-term consequences of the absence of leptin signaling in early life
Source: eLife. 2019 Jan 29;8:e40970. doi: 10.7554/eLife.40970 (PMC6384028; doi:10.7554/eLife.40970)
Supplement: Figure 3—figure supplement 2—source data 1. [file elife-40970-fig3-figsupp2-data1.xlsx]

## Sheet: Fig S2D
α-MSH-ir cells
Ubi	LepRNull	Ubi-LepRNull
20	N.D.	17
18		13
18		16
16
13
19
11
12

## Sheet: Fig S2H
β-endorphin-ir cells
Ubi	LepRNull	Ubi-LepRNull
37	4	32
34	1	32
31	0	21
34	5	36
