# Supplementary material for: Long-term consequences of the absence of leptin signaling in early life
Source: eLife. 2019 Jan 29;8:e40970. doi: 10.7554/eLife.40970 (PMC6384028; doi:10.7554/eLife.40970)
Supplement: Figure 3—source data 1. [file elife-40970-fig3-data1.xlsx]

## Sheet: Fig 3A
Decrease of body weight after 24h fast
Ubi	LepRNull	Ubi-LepRNull
-11.7	-8.9	-14.9
-11.7	-11.2	-12.5
-13.7	-9.4	-11.5
-13.6	-9.1	-11.9
-15.2	-6.5	-11.4
-13.1	-8.3	-13
-13.8	-8.5	-12.6
-14.5	-6.7	-11.2
-14.1	-6.8	-12.6
-15.9	-8	-8
-13.7	-5.8	-10.9
-13.1	-6.7	-13.1
-12.1	-6.8	-11.8
-14.7	-8.6
-11.7	-5.9
-11
-11.9
-12.3
-16.3
-12.3
-11.7

## Sheet: Fig 3B
Variation of VO2 consumption after 24h fast (dark phase)
Ubi	LepRNull	Ubi-LepRNull
-789.669	-697.563	-682.588
-894.769	-983.4	-544.544
-864.819	-424.163	-641.406
-758.113	-528.775	-287.885
-1075.68	-40.15	-197.23
-365.89	-341.05	-235.25
-616.98	-269.355	-443.725
-699.37	-342.195	-370.55
-637.905	-325.365	-330.005
-582.15	-469.275
-722.65	-695.255
-372.155
-776.575
-269.04

## Sheet: Fig 3C
VO2 consumption during fed and fasted state
Time of day	Ubi															Time of day	LepRNull														Time of day	Ubi-LepRNull
10h	3051	2974	3745	2725	3614	3618	2360	2914	3143	2386	2810	2230	2074	2547	3364	10h	1836	1216	1208	1097	1830	2132	1457	2057	1551	1320	1332	1439	1561	1473	10h	2064	2348	2840	3261	2585	2500	3062	2342	2484
fed	2461	2120	2287	2762	2484	3161	2394	3864	2579	2059	3778	2651	2192	3686	3301		1886	1019	1249	1590	2014	1936	1114	1528	1589	1259	1210	1404	2138	1388		2069	2523	2815	3187	2776	2154	2403	1950	2659
	3212	2181	2579	3861	3123	2826	2983	2580	2756	3543	3180	2537	2325	2471	2375		1735	939	1564	1557	1666	2203	1008	1315	2107	1612	1151	1656	1673	1493		3717	2198	1780	3461	2897	2115	2476	2499	2559
	3324	2304	2306	2905	2471	4158	4038	2567	2961	2297	2836	2633	2024	3465	2527		1351	962	1180	1668	1838	1825	2281	1461	1413	1340	1650	1641	1326	1579		2217	2507	1424	3020	3365	2181	3249	2310	2702
	2991	2014	2450	2510	2639	4798	2833	2671	2497	2108	2418	3535	2446	2503	2311		1279	983	1184	1246	1895	1610	2208	1304	1543	1448	1738	1502	1813	1625		1798	2206	1628	3161	2517	2004	2826	3666	2611
	3384	2641	3064	2560	3186	3899	2277	3459	2368	2628	4033	2520	2366	2368	2260		1342	1196	1260	1269	2142	1585	2344	1371	1292	1637	2068	1437	1479	1731		2124	3575	2052	3092	2590	2208	2856	2894	2848
	2635	3207	2327	2780	3438	4324	3271	3035	2631	3001	2729	2841	2247	2855	2481		1940	1393	1238	1211	3029	1902	1517	1221	1291	1440	2609	1764	1715	1684		2952	3071	1997	2491	3142	2152	2793	2134	2731
	2525	2380	2654	4108	2447	3235	2532	2317	2447	2285	2725	2402	2862	2823	3490		1912	1949	1349	1658	3021	1489	1473	1076	2134	1430	1906	1789	1458	1697		2749	2091	2864	2918	2607	2092	2621	2291	3479
	2197	2341	2493	2811	2402	4343	2240	3830	2566	2449	2915	2452	2278	2729	2993		1729	1515	1618	1480	1832	1819	1468	1673	1996	1480	1680	1529	1604	1541		2309	2112	2435	3393	2338	2827	2238	2302	3776
	2380	2200	2248	2231	2387	3935	2348	2659	2750	2563	3389	3235	2613	2640	2609		1326	1074	1892	939	1710	1828	1301	2332	2392	1566	1721	1518	1705	1795		2334	2257	1744	2651	2966	2555	3450	2081	2871
	2705	2225	2279	2633	2689	2894	2223	2417	2485	3254	3668	3143	2522	4741	2547		1722	999	1845	1061	2751	3131	2047	2354	1686	1380	1701	1764	1674	1645		2472	2288	1904	2696	2533	2188	3212	2196	2999
	2462	2496	4062	2502	2623	3161	3357	2531	3149	2470	4220	2659	2206	3493	2335		1869	1246	1347	1034	2107	2465	1660	2113	1584	1372	1645	1532	1638	1575		2023	2313	1795	3186	2764	2205	2729	2341	3023
	3162	2469	3657	2352	2408	2927	2380	2689	3142	2386	2759	2359	2106	3505	2500		1954	1130	1321	1566	2144	2748	1429	1536	1644	1642	1592	1501	1571	1697		3001	2392	1795	2752	3722	1972	2719	2202	2634
	2741	3021	3624	2536	2533	2700	2496	3215	2392	2293	2926	2482	2484	2659	2305		1738	1192	1223	1823	2151	1887	1451	1493	1515	1523	1564	1630	1832	2300		1951	2150	1862	2637	2817	1960	2260	1999	3262
	2417	3257	3564	3294	2762	4316	2731	3383	2436	2508	2584	2144	3102	2617	2411		1358	1576	1181	1216	2782	1734	1317	1879	1813	1386	1552	1491	2000	1739		2176	2211	2479	3317	2544	2441	3266	2183	3748
	2683	2186	2632	2368	2391	4099	2476	2542	3430	2127	2805	3154	2220	2465	2422		1291	1796	1093	1094	2877	1604	1257	1396	1854	1378	2405	1552	1502	1786		2162	2921	1802	2607	2449	2188	2654	2530	2772
	3708	2126	2370	2451	2722	3144	2584	2539	2411	2809	2373	2728	2178	2788	3182		1424	1461	1199	1107	1752	1543	1830	1361	2167	1405	1958	1495	1570	1586		2132	2384	1954	2766	2376	1972	2696	2138	2673
	2332	2199	2459	2762	2517	2984	2346	2362	2179	2276	3644	2469	2175	2435	2486		1458	1176	1398	1131	1814	1625	2060	1659	1733	1932	2696	1559	1470	1640		2128	2302	1836	2937	2422	2041	2547	2277	2796
	2548	2446	2455	4041	2317	2938	2447	3323	2232	2338	3592	2507	3143	2521	2501		1590	1069	1737	1343	1967	2285	2088	2610	1647	1389	2272	1610	2056	1730		2716	2405	2134	3175	2612	2149	3562	2105	2654
	2411	2251	2271	3548	2523	2739	2481	2525	2461	2133	2726	2194	2321	2708	2311		2089	1115	1561	1096	2860	1976	1474	2207	1700	1539	1811	1490	1793	1651		2091	2462	2091	2645	2390	1987	2632	2014	2780
	2157	3663	3725	3244	3739	3921	2170	2366	3104	2184	2788	3431	2539	2572	2321		1610	1412	1173	908	2720	2785	1498	2503	1459	1341	1815	1587	1654	2264		2999	2968	1752	2605	2615	1894	2746	2210	4033
	2272	2463	2756	2562	3583	2928	3294	2244	2281	2994	2354	2534	2281	2389	2244		1673	1029	1136	1305	1930	1746	1568	1763	1927	1378	1776	1469	1438	2087		3050	2508	2090	2733	2578	3259	2464	2175	3231
	2458	2369	2156	2508	2542	3107	2510	2528	2623	2336	2770	2409	2287	3164	2221		1499	1609	1147	1669	2201	1706	1326	2021	1539	1367	1750	1546	1470	1669		2936	2229	1994	2668	2790	3077	2525	2122	2827
	2520	2321	2415	2341	2697	2915	2442	3422	2412	2457	2607	2258	2312	2836	3559		1587	1826	1124	1608	2020	2350	1304	1606	1638	1575	1709	1539	1577	1643		2463	2313	2836	3292	3547	2619	3213	2330	2788
	2395	2388	2186	2519	2422	3057	2644	3541	4141	2159	3802	2365	2594	2505	2800		2323	1614	1068	1808	1854	1827	2214	1579	1973	1465	1655	1462	1549	1695		2164	2067	1876	3394	2769	2018	2404	2990	2852
	2366	2362	2357	2569	3336	2791	3833	3727	3490	2465	4486	2151	2330	2974	2501		1432	1236	1130	1222	3028	2138	2346	1427	2420	1932	1740	1548	1492	2264		2317	2896	1977	2601	2524	1897	2702	2502	2776
	3858	2097	3930	2719	2331	4042	2268	2494	2633	3081	3144	3379	2363	2580	2530		2209	1213	1205	1312	2095	2681	1453	2015	1813	1736	2554	1529	1424	2106		3095	3523	1995	2971	2539	2207	2411	2496	2653
	3704	4113	3573	4302	2470	4579	2321	2350	2509	2218	2850	3045	2778	2600	2452		1368	1267	1499	1180	1944	2687	1328	2341	1745	1540	2005	1713	2163	2031		3065	2958	1751	3047	2002	1818	3313	3027	3600
	3390	3430	2372	3494	2386	4277	2148	2336	2464	3338	3949	2974	2339	2375	3419		1981	1714	1615	1118	1521	1901	2108	1616	2163	1385	2153	1834	1773	1738		2244	2392	2990	2530	3541	1853	3111	2937	3937
	2451	2065	2174	2177	2664	2932	2358	3321	3146	2926	3844	2482	2325	2456	3523		1454	1191	1267	1071	2956	1702	2093	1590	1988	1248	1997	1730	1758	1555		2120	2164	2818	3535	3605	1965	2249	2842	3467
	2645	2372	2426	2562	3622	3034	2424	3331	3366	2337	2953	2927	3146	3590	3307		1452	1502	1555	1231	1773	1789	1757	2257	2052	1376	1953	1838	1480	1575		2050	2409	2326	3609	2535	3045	2725	2333	2430
	2522	2305	2186	3335	3487	2913	2539	2381	2364	2170	2867	2963	2959	3176	2513		2193	1911	1288	1199	2962	2451	1527	1896	1830	1439	1883	1510	1570	2312		2924	2067	1672	2810	2245	3072	2636	2154	3872
	3321	3216	1817	3898	3142	3329	2992	2883	2568	2152	2891	3253	2431	3438	2449		2045	1757	1243	1577	1929	1719	1522	2344	1751	1524	1841	1627	1574	2173		2661	2471	2771	2404	3162	2104	2432	2605	3334
	3249	3288	2388	2918	2386	5549	2468	2798	2205	2636	2831	2697	2498	2909	2470		2366	1566	1418	1337	2218	1629	1346	1853	2168	1473	2354	1571	1969	2327		3192	3164	2269	2689	3016	1917	3712	3279	3102
20h	2840	2760	3613	2857	2696	4173	2244	3432	2820	2378	3942	2932	2594	2871	2771	20h	1621	1456	1259	1308	2940	2587	1309	2654	2190	1756	2041	1638	1607	1659	20h	2344	2179	2918	3185	2533	2179	3622	2748	2525
	3698	2499	3261	3208	2777	3112	3050	2953	4077	2712	3648	3773	3213	3203	2647		2355	1364	1828	1298	2811	2378	2089	2882	2057	2067	2774	1719	1848	1626		2175	2718	2595	3787	2652	2950	2892	3012	2490
	3755	4057	3907	4242	3574	4710	3148	4443	4300	2737	3374	2976	3431	3697	3131		1564	1664	1926	1324	2888	2230	2076	2689	2408	1725	2439	1825	2067	1775		3294	2938	3145	3668	2861	2842	4184	2466	4171
	2963	3867	3066	3883	3526	5292	2333	4255	3997	2300	3029	2862	3129	3659	3790		2296	2040	1554	1210	2552	2232	1830	3036	2013	1768	2270	1890	1682	2054		3501	3417	3270	3452	3279	2240	3804	3027	3865
	3893	3784	4120	3963	3138	4578	2903	3734	3799	3051	3108	4062	3498	3625	4209		1949	1475	2099	1470	3099	1900	1708	2707	2128	1934	2096	1627	1791	1842		3350	3163	3262	3061	3895	3235	2858	3072	2818
	3433	2497	3159	3779	2800	3487	2790	3303	2854	3109	3953	4003	2383	3007	3835		2278	1399	2075	1819	2844	2792	1752	2856	1913	1527	2565	1996	2516	1912		2636	3530	2104	2851	3763	3089	3752	2201	3937
	3844	2627	3003	3750	3546	5215	3209	3178	3340	3158	3263	3879	2689	3631	4038		1104	1548	1253	1585	3176	2829	2426	2938	2437	1570	2599	2176	1854	1685		3183	2974	2246	2958	3743	3391	3600	2229	4131
	3826	3656	3211	2931	3635	4607	3404	3405	4195	2684	3908	3822	2788	3034	3383		1523	1668	1266	1195	3476	2836	2380	3054	2201	1548	2172	1625	2130	1653		3120	2684	2463	2944	2842	2149	2850	3135	3036
	3877	4020	4105	3326	4860	3876	3627	3010	4061	2762	3435	2992	3585	2818	2912		1640	1324	1823	1196	3038	2859	2579	2871	1898	1749	2491	1578	1892	2100		2420	3618	2192	3520	3001	3500	2611	2481	4063
	4204	3000	3391	3734	3731	5170	3330	4325	2695	2617	4794	2987	3107	3811	3418		2291	1215	2102	1556	3051	2687	2377	2979	2421	1843	2678	1697	1843	1812		3144	2961	1857	3266	3075	3478	2783	2499	4401
	3016	2506	3995	3744	3300	3777	2893	4296	2691	3861	4203	3133	2747	3720	4158		1499	1811	1852	1466	3108	2591	2163	2978	2165	1436	2578	1614	2008	1855		3217	3569	2838	3698	4098	3089	3811	3942	3357
	3322	3316	3904	3620	3375	3775	3669	4157	3834	3290	4206	3829	3024	3554	3119		1826	1716	2067	1295	3109	3055	1686	2636	1648	1441	2154	1546	1754	2547		3158	3568	2706	3208	3659	3413	3752	3636	3738
	3381	2655	3571	2943	2973	4767	3846	2965	4110	3026	4103	4154	3059	3191	3524		1599	1887	2107	1688	3417	3105	1357	2511	1681	1953	2066	1808	1570	1699		2428	3733	2260	3258	4113	2508	2814	3082	4284
	3397	2657	4031	4018	3647	4591	3411	4309	4416	2803	3147	4105	3947	3285	4323		1554	1464	1921	1719	3101	2470	1804	2503	1798	1772	2398	2099	1643	1531		3018	3650	2833	3905	2860	3216	2907	3075	3374
	3207	4149	4136	3849	4507	5196	4291	4353	2840	2626	3571	4122	3270	4005	4021		2157	1396	1340	1420	2947	2810	2635	2465	1738	1552	2717	1583	1540	1568		3306	3748	2710	3955	2765	3581	4181	2748	4364
	3903	3890	3158	3858	4431	3830	2813	3546	3289	2840	3716	3804	2698	4070	3134		1412	1300	1169	1608	3261	2999	1632	2069	1905	1359	2580	1722	2476	1879		2495	3202	3276	3449	3475	3265	3884	2330	3368
	4058	2962	2947	2951	3557	4978	3530	3990	2632	3347	4553	4047	3133	3910	4324		1263	1358	1285	1837	2829	2967	1766	2112	2442	1495	2188	1648	2123	1952		3171	3735	3196	3996	3897	2572	2908	3631	4227
	3979	2857	3400	3017	4347	5132	3002	3028	3838	2940	4488	4125	3480	3630	3799		1322	1910	1349	1470	3593	2450	1860	1956	1849	1570	2134	1620	1952	1676		2618	3863	2453	4110	3765	3322	4004	3685	4278
	3188	3943	3371	3362	3756	5047	3571	4454	4235	3437	4327	3486	3618	2676	3138		1932	1338	1152	1316	2331	2295	1678	2622	1701	1465	2009	1870	2020	1724		3380	3684	1960	2947	2796	3292	4110	2982	4453
	3608	3962	3805	3612	3980	4014	4195	4397	4006	3482	4107	2905	4077	2748	2935		1652	1171	1233	1197	2704	2070	2020	2412	1630	2033	1923	1941	1588	2092		3239	3457	1797	2683	3454	3563	4085	2594	3187
	3668	4109	4045	3654	2868	4108	3115	4324	2575	2751	2940	3602	2969	3102	3967		2384	1175	1212	1497	2466	2614	2307	2596	1523	1561	2216	1666	1725	1737		2423	3689	1842	3411	4316	3536	3139	2222	3384
	4161	3572	3850	3166	3172	3508	2709	4339	2938	2718	3000	3744	3004	3122	4162		1444	1234	1466	1516	2570	2660	1590	2366	1512	1651	2512	1490	1533	1754		2931	3155	2719	3257	3187	2467	2724	2333	4086
	3605	2544	3040	3339	3517	5300	3344	2684	3814	2890	2979	3896	2769	2991	2918		1334	1156	1637	1811	2567	2755	1761	2119	2063	1522	2007	1655	2159	2045		3206	3472	3078	2901	2925	3106	3135	2732	3314
	3402	3108	3046	3154	3095	4873	3333	2623	3769	2726	3295	3562	2688	3189	3151		1274	1786	1402	1285	2819	2901	2431	2224	2132	1574	1876	1614	1453	2415		2933	3141	3331	3679	3531	2555	2960	2328	2936
	3077	3226	3735	3278	3666	4042	2847	3965	3461	3103	2787	3648	3210	3273	3938		1772	1746	1630	1275	3040	2310	2448	2486	1628	1400	1863	1550	1469	1752		2180	3043	3031	3223	2784	3052	4048	2877	2941
	3013	2666	2850	2740	2794	4255	3053	4018	3157	2826	3882	3230	2593	2883	4013		1587	1299	1364	1184	3476	2163	2211	2865	1513	1700	1802	2028	1510	1388		2216	3537	2082	3609	2757	3021	3792	2389	3922
	2938	2627	3076	3820	3419	3576	3997	2989	3042	3469	4080	3477	2648	3407	3982		2208	1168	1372	1521	2377	1944	2045	2614	1757	2050	1983	2165	1669	1400		2327	2876	1688	2831	4003	2621	2783	2443	4197
	3394	2806	4060	3663	3392	4978	3892	3729	2881	2942	4112	3759	3859	3497	2647		1933	1484	1242	1320	2940	1969	1912	3064	1952	1600	2090	1572	2008	1567		3315	2790	1632	2787	3868	2499	3685	2163	3353
	3234	3652	2848	2499	2964	4821	3257	2568	3216	3191	2686	3075	2695	4110	3394		1586	1541	1703	1386	2952	2574	1759	1949	2099	2324	2221	1827	2105	1856		3203	3625	1693	3552	3544	2792	2962	2587	3481
	3955	2658	3096	2657	3959	3584	3366	4087	3138	2672	3570	2858	2879	3417	3377		1480	1379	1773	1195	3406	2841	1866	1936	1952	1749	2262	1559	1572	2149		2466	3019	2017	3350	2734	3097	4200	3185	2713
	3278	3092	3094	3671	2969	3861	3088	4119	2507	3101	2987	3560	3317	2906	3859		1338	1312	1670	1196	3096	2747	2483	1941	1813	1880	1890	1539	1633	1500		3259	3567	1722	3614	3457	3308	3175	3048	3530
	3818	2642	2965	3474	3526	4222	3754	2585	2781	2927	3718	3669	3245	3529	2954		1275	1901	1470	1074	2684	2862	2297	2152	1816	1763	2018	2087	1643	1799		2619	3177	1978	2934	3912	3107	3987	2624	3787
	3665	3403	3584	2940	2678	4423	3625	3136	3500	3162	2788	3963	4327	2956	2735		1355	1867	2075	1619	2064	2492	1793	1789	1816	1775	1815	1950	2258	1673		2489	3445	2452	3573	2909	3271	3041	2395	3048
	3459	3770	4204	3334	3112	4590	3038	4027	4313	3347	3141	2922	3205	3485	3773		1841	1662	1902	1695	2733	2322	2743	2740	2104	1391	1650	1813	1975	1635		3447	3280	2003	3486	3607	3596	3799	2470	3955
	3360	4017	2918	3521	3754	4640	3834	2991	2805	3185	3209	3232	3607	3995	3252		2089	1859	1751	1622	2696	2011	2324	2590	1957	1230	2118	2344	1992	1951		3361	3239	2771	4000	4170	3419	2987	3272	3708
	3779	3919	4296	3528	4329	3210	2936	3985	4001	2619	4661	3698	3538	3936	3546		1683	1723	1861	1442	1690	3101	2567	2711	1947	1247	2032	2098	2392	1731		3240	3705	2812	4053	4287	3585	4103	2715	4209
	3933	3678	4528	3817	4266	4439	2939	3012	4234	3217	4173	3877	3435	3590	3909		1803	1531	1952	1866	2359	3407	2285	2860	2076	1535	2439	1402	2090	1567		3406	3725	1907	3935	3850	3583	4306	2693	4000
	3618	3551	3724	3721	4564	4846	3427	2664	3842	2691	3621	2772	3316	3685	3775		2191	1693	1996	1353	1700	3205	1791	1924	2094	2035	2482	1905	2153	1986		3306	3769	2656	3922	2553	3397	4208	3377	3965
	3253	2353	2866	3412	4128	4476	3452	4177	4342	2812	3718	3276	3388	2422	3481		2229	1503	1619	1494	2136	3008	1701	1917	2399	1655	2085	1560	1567	1677		3312	3469	2696	3560	2717	3277	3820	2987	3364
	3467	2328	3331	3386	2894	4423	2711	4018	4109	3045	2836	3818	3679	2732	2784		1653	1329	1884	1766	1916	2449	1612	1798	1626	1397	1966	1743	1481	1880		3161	3382	2856	3412	2409	2301	3693	3243	2493
8h	2907	2292	4180	2436	3262	3057	2873	2843	3962	2383	2567	3496	2795	2553	2860	8h	1446	1469	1270	1568	1931	2139	1898	1565	1747	1311	1929	1693	1678	1715	8h	2374	2354	2861	2434	3050	3055	3376	3294	2779
fasted	3535	2597	4417	2631	2920	2663	2745	2150	4270	2152	2699	3437	2544	2798	2614		1404	1174	1214	1358	1571	2831	1613	1611	2257	1264	2399	1502	1363	1380		2061	2872	2336	3240	2658	2965	2775	2404	2796
	3470	3758	3809	2659	3545	3063	3158	2265	4311	2459	2516	3523	3175	4114	4084		1834	2076	1133	1302	1615	2051	1794	1794	1877	1401	2030	1559	1588	1458		3197	2756	2145	2560	2642	2134	2670	2308	2701
	3382	3354	2767	2985	3745	3403	2859	4431	2314	3187	2773	3665	2770	3594	3740		2310	1858	1460	1749	1776	2038	1629	1975	1789	1405	1804	2161	1419	1531		2852	3425	1728	2929	3207	2250	2790	2095	3510
	3002	2216	2447	3878	2238	2982	2186	2918	2742	1988	2651	2420	2881	2566	2596		2114	1464	1062	1219	2053	1949	1478	2056	1676	1397	1750	1999	1533	2004		2249	2237	2804	3021	3590	3041	4395	2388	3756
	3225	2280	2804	3908	2397	3916	2347	2390	2713	2339	4084	2600	3275	2908	2331		1461	1171	1029	1090	2559	1680	1510	1555	1768	1390	1683	1555	1812	1519		2401	2400	2734	2743	2407	2172	2567	3413	2572
	3191		4216	4257		1373	2521	4858	3033	2462	3023	2689	4007	4064			2872		2783	2346	2339	970	1821	1079	913	2380	1884					2971	2689	2639	3924	4723	1859	3228	4327
	5223		3648	3579		4146	3936	4216	3322	3603	3730	3729	3585	3434			1885		1505	2282	2319	1175	2350	2518	2205	2334	2058					2078	3682	3740	3565	2928	2119	3631	3390
	4134		3340	3020		3577	3788	4018	3508	3339	3423	3389	3062	3045			1222		1545	2607	1790	1967	2119	1398	1481	2036	2313					2068	3324	3437	2996	5024	2998	4044	2919
	2799		2433	3603		3104	3604	3882	3558	3245	2912	2994	2304	1925			1084		1405	1597	1184	2066	1989	1202	1330	1329	2504					1980	2396	3194	2778	4835	2769	3691	2501
	3100		3079	3340		2418	3285	3579	3594	2990	2812	2827	2294	2252			1347		1368	1367	981	1928	1543	1312	1342	1147	2076					2214	2796	2858	2179	4165	2315	3303	2572
	2871		2335	2322		2340	3340	3361	3102	2255	2497	2525	2353	2476			1048		2315	1679	1486	2180	1763	1914	1473	900	2132					2022	3262	2370	2041	4001	2276	3161	1648
	2840		2438	2502		2470	3020	3186	2362	2529	2471	1846	3902	2106			1129		1392	2485	887	893	1120	1194	1410	932	1338					2226	2315	2319	2259	3207	1430	3126	1943
	2632		2540	2437		2149	1901	2367	2187	2525	4002	2263	2135	2146			1732		1213	1392	748	2073	1298	1318	2142	781	1289					1871	2931	4010	3468	3616	1724	2103	2032
	2803		3949	2348		2113	1851	2467	2313	3507	2475	2450	1985	2475			1057		2021	1737	659	1540	1303	1869	2226	776	1177					2209	2551	2919	2642	4048	2747	2456	3080
	2800		2055	2425		4114	2006	2444	2148	2434	2552	2240	2089	2361			1005		1345	1797	665	930	1328	1267	2028	790	1120					2162	2790	2314	1990	3144	2435	2270	1466
	3056		2348	3298		2625	3257	3764	3867	2254	2386	2223	3930	2334			1379		1160	1682	616	965	1689	1247	1156	1887	1316					2833	3953	2293	2419	3273	1748	2451	2230
	2796		2279	1805		2130	2998	3179	2978	2372	2289	2131	1727	2281			1373		1208	3003	587	959	1845	1366	1197	1258	1191					1778	3380	2990	2159	3302	2170	2562	2318
	2780		2994	2171		2156	2038	2025	2769	2254	2314	1955	2363	2142			1697		1322	2179	528	982	1399	1417	1192	1242	1180					2002	2354	2283	2408	2999	1704	2496	3367
	2450		2313	2293		2530	2066	2405	2040	2991	2336	2146	2609	2001			1128		1391	1391	523	1128	1676	1392	1238	1317	1162					1920	2579	2441	2576	3294	1877	2215	2809
	2793		2508	2337		2451	2349	2451	2136	2547	2372	3489	2424	2084			1295		1259	1444	500	1216	1846	1498	1282	2342	1182					1967	2635	2283	2614	3222	1778	2230	2547
	2741		2300	2245		2640	2168	2343	2031	2393	2322	2928	2103	2186			1815		1663	1555	442	1989	2327	2168	1550	1934	1902					1839	2317	2370	2158	3927	1816	2129	1923
	4247		2391	3165		2396	1975	2133	2187	2616	4180	2402	2129	2157			1447		2205	1591	452	2355	1880	1826	2219	1832	2177					1812	4071	2263	2252	3126	2912	2201	2107
	2440		2456	2240		2335	1793	3902	3077	2507	3456	2265	2685	2209			1254		1203	1453	466	1986	2000	1274	1610	993	1962					3315	2633	2648	2099	3103	1766	2250	2349
	2630		2380	2634		2198	1818	3203	2752	2193	3118	2182	2182	2769			1037		1117	2793	451	1165	1242	1424	1321	922	1362					2428	2744	2876	2148	2787	1728	2076	2886
	2580		2322	2268		2200	2129	2940	2090	2165	2253	2280	2087	2526			1345		1141	2095	444	2196	1083	2352	1414	876	1113					1490	2494	2429	2228	2836	1897	3294	1724
	2439		3793	1942		3243	1958	2310	2299	2331	2288	2051	2090	2256			1148		1144	1367	446	1152	1325	2517	1488	907	1133					2054	2381	2185	2491	3099	1810	2725	1781
	4807		3142	2238		2408	2021	2397	1974	2320	2203	2242	1995	2276			1134		1152	1504	486	1160	1348	2075	2118	1172	1169					1791	3593	2341	2156	3039	1814	1649	1872
	3662		2459	4151		2307	2066	2516	1952	2823	2207	2032	1999	2311			1080		2064	1740	544	1338	1392	1147	2223	1229	1167					1920	3474	2099	2211	3041	2229	2355	3538
	2479		2635	2896		2339	3095	3270	1910	2050	2464	3159	3626	2192			1080		1671	2327	599	1332	1503	1160	2032	1332	1202					2064	2185	2065	2365	2856	1537	2247	2686
	2375		2497	2049		2311	1738	3851	1976	2195	2724	3039	2871	2998			1044		1053	1301	656	1363	1951	1198	1180	1159	1253					2483	2306	2254	2071	2800	1597	2219	2369
	2563		3036	2142		3983	1880	3352	2044	3712	2170	2047	1974	3515			961		1122	1280	693	1995	1045	1322	1321	1757	1335					3096	2462	3736	2152	2724	1871	1916	1745
	2642		2027	2661		2690	1948	2640	1980	2995	2240	1906	2081	2231			1082		1859	1590	839	1323	1406	1429	1398	1680	1314					2572	2499	1997	2706	4305	1870	3654	1985
	3500		2222	2044		2236	2055	1697	2070	2354	2460	2189	2169	2076			1544		1354	1749	1739	1294	1443	2405	1495	1007	2244					1309	2387	2301	3595	4881	1878	2710	1688
	2528		2381	2475		2649	1963	2122	1840	2318	3504	2444	1984	2259			2614		1394	1730	1144	2038	1481	2345	1964	1089	2071					1930	3515	2149	2614	3466	2377	1561	2061
	2597		3722	2140		2197	1695	2058	3480	2265	2311	2025	3784	2096			1973		1372	2484	1640	1788	1492	2243	2268	1968	2081					1899	3246	2216	1991	2227	1942	2204	2049
	2896		2952	3181		2226	3064	2286	1992	2658	2426	3282	1640	2493			2220		1249	2196	1503	1303	1552	1170	2091	2096	1895					1842	2371	2238	2209	2623	1881	2313	3296
	2416		1768	3058		2027	2560	4139	2309	2402	2531	1868	1979	2802			1932		1105	1579	1752	1812	2022	1167	1301	2035	1954					2649	2034	2459	2228	3160	1915	2196	2552
	3547		2293	3488		2574	1920	3483	2263	2266	2520	2303	2247	2145			1668		1870	2981	1390	1314	1267	1577	2318	1126	2173					2465	3157	2291	2382	3549	1895	3341	2100
	4256		3281	3340		3423	2246	3414	2757	2705	2743	2544	2884	2804			1275		1331	2442	995	1617	1746	1457	1367	1209	1240					1394	3399	3368	3318	2705	2661	2134	2280
20h	3573		1717	2031		2309	2357	2901	2424	3555	4186	4111	1889	4026		20h	2467		1142	2583	1805	1986	1714	2457	1529	2114	2110				20h	3096	2551	2105	3124	4206	2491	3922	3223
	2002		3250	3913		3719	3176	3926	3617	2919	4186	3835	3967	3624			2327		1592	2318	1279	1995	1793	2232	1586	1137	1530					2278	2656	4136	3206	4764	2345	3532	3009
	4336		2076	3934		3434	3171	3789	3230	2801	3889	3718	3425	3374			2590		2462	2246	2152	1610	2224	2441	1969	2197	2191					3000	4064	3158	1794	4324	1696	3368	3047
	3553		2787	3467		2915	2844	3665	2873	3355	3516	3414	2977	3279			2265		2073	2330	2159	1281	1292	1972	1621	2124	2207					2619	3299	3468	1939	4161	2620	3448	2945
	4365		3957	3472		3189	2579	3851	1987	3070	3562	3394	2489	3367			2478		1766	2679	1822	1306	1730	1477	2206	2038	2140					2683	3277	3469	2273	3884	3092	3403	2730
	3509		3702	3237		3674	1628	3649	1377	3109	3336	3737	1494	3415			2235		2256	2124	1421	1573	1888	2222	2232	1806	1942					2671	2931	2925	3611	3096	2564	3074	3350
	4060		3519	3331		2923	3300	3493	3413	2555	3218	3657	2489	3567			2271		2148	2486	1774	1429	1132	2312	2357	1786	2035					2701	1969	3552	3279	2184	2394	3041	3006
	4288		3462	3124		2941	2628	3509	3149	3014	2881	3536	3357	3195			2211		2349	2224	2197	1452	1779	1356	2008	1142	1918					1899	2093	3297	3209	2687	2336	3426	3182
	3991		2340	1983		2008	2779	3382	3361	3002	2599	3677	3336	3126			2211		2378	2551	1502	2008	1414	1168	1378	996	1785					1386	3933	3007	2965	2198	2257	3506	2943
	3342		2170	2011		2113	3081	3723	2686	3326	2600	3667	2927	2224			2228		2202	2593	1197	2199	1409	1633	1356	1022	1620					1763	3840	1981	2977	4399	1136	3414	2869
	3911		1838	1676		3814	2637	3519	2533	3296	1649	3814	3190	2105			2222		1629	2410	2124	2096	1483	2253	1263	981	1993					1777	3391	2020	3037	4837	1640	3496	2857
	4334		3440	3300		3593	2722	3488	2726	2456	2319	3561	3112	2754			2387		1188	2412	2053	2235	1519	1754	1279	1010	1788					3795	3557	2462	2988	4408	2156	3588	2644
	3833		3260	3662		3574	1643	3026	2974	2034	3961	3869	3408	1719			2111		2139	2336	1895	1314	1720	1255	1382	1212	1698					3064	3728	3911	3151	4189	2912	3556	2599
	2719		3444	3832		3661	2257	3483	3028	2080	2948	3712	2737	1657			2242		2279	2436	1884	1058	2211	1503	1427	1239	1784					2897	3722	3497	3099	3840	2230	3601	1892
	3671		3817	3271		3470	3421	3737	2815	2761	2704	3492	3161	2456			2162		1581	2227	1946	1252	1475	1550	1660	1147	1204					2711	3131	3423	2846	3877	2157	3531	1996
	4266		2870	3576		4092	3254	3473	3473	3422	1674	3580	2560	3907			2298		1423	2437	1605	1174	1404	2198	2113	1318	1370					2810	2586	3419	2872	3614	1244	3512	2101
	4473		2335	2752		3959	2947	3536	3105	3347	1522	3736	1492	3794			2107		1411	2403	1700	1298	900	2123	1179	1817	1177					2264	2152	3342	2578	2016	1639	3123	3730
	4141		1726	1706		3866	2750	3231	2964	2895	1859	3536	3250	3459			2085		2007	2488	983	1301	1235	1307	1262	1038	1124					2298	1640	3242	1780	2334	1665	2604	3291
	4272		1377	1493		3960	2310	3282	2927	1806	1733	3270	3350	3555			1775		1998	2223	882	1813	1282	1174	1412	890	1150					1313	1969	3187	2105	2076	1887	1683	2897
	4232		2295	1907		3337	1519	1974	3108	1586	2144	3585	3689	3698			1433		1372	1926	2164	2257	1389	1586	2293	1765	1337					1196	4167	3273	2439	3259	2060	3106	2749
	3672		3715	2259		2688	2242	1702	3126	2316	3813	3720	3522	3584			1377		1323	1912	2052	1243	1376	1556	1595	937	2092					1383	3502	3265	3325	4747	2488	3619	2398
	3982		3224	3699		1733	1488	2351	2893	1630	3416	3566	3470	3680			919		1040	1168	1743	875	1467	1497	1628	906	2209					1938	3657	3097	3398	4560	2304	3571	1734
	3086		3016	3537		3521	1946	2117	3120	3501	3393	3571	3343	3546			935		1018	1112	1016	1181	1477	2083	913	873	2006					3707	3429	2973	2929	3875	2169	3497	1563
	1769		2103	3515		1912	3495	4331	2968	2943	3348	3068	3223	3376			988		1164	982	819	930	1326	1209	1161	824	1267					3039	3601	2532	2902	3237	1237	3446	1809
	1524		1466	3432		2061	2916	3738	2900	3124	2709	2428	3234	3429			2737		2252	2505	770	955	1484	2143	1304	771	1044					2569	3555	2199	2496	2393	1523	3307	1773
	1632		2447	2989		4115	2485	3592	3029	3256	2841	2135	2958	3355			2092		2063	2023	716	1079	1712	1115	1455	780	1149					2552	3022	2467	1592	1767	1765	1981	1891
	5100		2337	3176		3795	2031	3274	2763	2874	2178	1539	2072	3415			1828		1840	1870	1489	1444	1331	1040	1378	1573	1119					1706	2229	3704	2824	2069	3023	1758	3893
	4144		1314	1462		3918	1362	3230	2966	2524	1331	1921	1504	3439			1359		1212	1834	954	989	1114	1772	1431	1072	1215					1254	1620	3683	2477	2411	2600	2269	3055
	3853		2193	1380		3968	1459	2936	2517	2199	2048	2283	1498	2260			1171		1129	1544	2300	1005	1583	1298	1475	789	1827					1378	1781	3731	2458	2490	2388	3804	2659
	4208		3165	2127		3821	2178	2338	1972	1420	2764	4068	2287	1977			1085		2067	1401	2120	1038	1633	990	1330	939	1071					2262	2250	3838	1721	2585	2201	3551	2397
	3414		3121	2281		3797	3325	1532	1689	2251	3573	3851	1506	2223			792		1210	1492	1014	1893	1198	1449	1479	921	1252					2531	3742	3588	3203	3524	2206	3341	1748
	2921		1741	1458		3368	2688	1588	1507	3212	3269	3320	2105	1564			866		1318	1932	1366	1036	1167	932	2062	1691	2073					2063	2131	3482	1782	3936	2165	2483	1582
	1513		1173	1645		3120	1741	1786	3612	3325	2882	2994	3514	1799			673		890	1537	2080	697	880	901	1863	890	1728					1531	1532	3431	3022	3377	1159	1704	1384
	1477		1275	1856		2764	1372	2160	3297	3446	2890	2516	3503	1889			758		1294	1468	1075	665	1563	854	1238	750	1076					1143	2002	3185	2241	1927	1763	1752	3380
	1258		1284	2757		1727	2162	3849	2993	3090	2109	2474	3258	2066			773		1389	1951	782	630	1593	947	1158	755	1064					1711	1785	2665	1840	1839	2500	1773	2801
	1125		2274	3207		1840	1460	3224	2722	2790	1472	2337	2494	3940			890		949	1446	916	585	1045	1453	1246	617	972					2933	2073	1643	2915	2136	2317	1762	2639
	4253		2110	2707		2202	1315	2676	2423	2359	2880	2014	1655	3738			2037		869	1051	1148	538	955	893	1204	647	1276					2380	2801	1884	1745	2077	2468	3802	2032
	3386		1187	1823		1653	1633	1891	1656	1597	1731	1386	1220	3036			1058		748	1112	626	484	1006	798	1194	935	1044					1865	2365	3981	1553	3378	1849	2811	1298
	2255		1480	1522		1233	3584	1277	1265	1270	1196	1289	1126	2950			875		794	909	563	509	743	771	1178	1391	881					1226	1536	3370	3515	2185	1098	1733	1330
	1483		1274	1396		1432	2649	2727	1125	1205	2016	1631	1579	1858			726		679	868	511	488	831	622	1275	852	781					976	2173	2626	2918	2868	1080	1445	1065
8h	1261		2529	1545		1146	1607	1470	1084	1440	1907	2069	1541	1560		8h	688		663	812	473	522	947	670	1293	682	763				8h	1039	1524	2038	1924	2760	1746	3230	1765
	1215		1814	1426		4734	1177	1354	1652	4228	1766	2116	3359	1236			728		699	859	415	539	641	580	1219	583	904					1204	2005	1732	1810	4570	1185	1477	2607
	1178		1573	2924		3029	1083	1941	4480	3410	1744	4033	1621	1144			566		621	1148	416	541	608	547	1230	578	751					3277	2668	3137	1865	3700	1742	1798	1277
	1058		1751	1661		1684	3221	1967	3216	2811	3240	3334	1281	961			622		598	813	405	484	780	502	1528	582	818					3699	2546	3224	2054	2235	2357	1976	1305
	4385		5408	5023		1381	2618	3672	2661	2331	3781	2763	2036	3092			3075		2840	4156	364	515	555	521	1328	508	648					3282	4318	2025	2021	1810	1306	3591	1698
	5150		4363	4011		1155	1803	3185	1704	1376	2660	2229	1791	3517			3081		2862	3309	396	519	760	486	1626	658	558					2740	3986	1591	1666	2123	1734	2007	1973

## Sheet: Fig 3D
Daily food intake on HFD (kcal/g)
Ubi	LepRNull	Ubi-LepRNull
30.0015	34.7805	35.046
30.267	36.9045	35.3115
24.6915	41.6835	30.798
28.674	36.108	31.329
27.081	35.3115	28.674
28.143	39.0285	28.9395
27.081	29.736	28.9395
29.205
26.019

## Sheet: Fig 3E
Delta of VO2 consumption between HFD and chow feeding
Ubi	LepRNull	Ubi-LepRNull
151.043	158.637	180.231
343.472	386.288	186.487
76.9495	205.769	314.846
113.64	387.334	157.138
443.029	188.675	542.628
88.7998	145.475	278.453
112.353	259.769	224.738
210.131	275.669	351.893
265.9	318.6
124.825
451.056

## Sheet: Fig 3F
VO2 consumption during chow and HFD feeding
Time of day	Ubi															Time of day	LepRNull														Time of day	Ubi-LepRNull
18h	3390	3430	2372	3494	2386	4277	2148	2336	2464	3338	3949	2974	2339	2375	3419	18h	1981	1714	1615	1118	1521	1901	2108	1616	2163	1385	2153	1834	1773	1738	18h	2244	2392	2990	2530	3541	1853	3111	2937	3937
	2451	2065	2174	2177	2664	2932	2358	3321	3146	2926	3844	2482	2325	2456	3523		1454	1191	1267	1071	2956	1702	2093	1590	1988	1248	1997	1730	1758	1555		2120	2164	2818	3535	3605	1965	2249	2842	3467
	2645	2372	2426	2562	3622	3034	2424	3331	3366	2337	2953	2927	3146	3590	3307		1452	1502	1555	1231	1773	1789	1757	2257	2052	1376	1953	1838	1480	1575		2050	2409	2326	3609	2535	3045	2725	2333	2430
	2522	2305	2186	3335	3487	2913	2539	2381	2364	2170	2867	2963	2959	3176	2513		2193	1911	1288	1199	2962	2451	1527	1896	1830	1439	1883	1510	1570	2312		2924	2067	1672	2810	2245	3072	2636	2154	3872
	3321	3216	1817	3898	3142	3329	2992	2883	2568	2152	2891	3253	2431	3438	2449		2045	1757	1243	1577	1929	1719	1522	2344	1751	1524	1841	1627	1574	2173		2661	2471	2771	2404	3162	2104	2432	2605	3334
	3249	3288	2388	2918	2386	5549	2468	2798	2205	2636	2831	2697	2498	2909	2470		2366	1566	1418	1337	2218	1629	1346	1853	2168	1473	2354	1571	1969	2327		3192	3164	2269	2689	3016	1917	3712	3279	3102
20h	2840	2760	3613	2857	2696	4173	2244	3432	2820	2378	3942	2932	2594	2871	2771	20h	1621	1456	1259	1308	2940	2587	1309	2654	2190	1756	2041	1638	1607	1659	20h	2344	2179	2918	3185	2533	2179	3622	2748	2525
	3698	2499	3261	3208	2777	3112	3050	2953	4077	2712	3648	3773	3213	3203	2647		2355	1364	1828	1298	2811	2378	2089	2882	2057	2067	2774	1719	1848	1626		2175	2718	2595	3787	2652	2950	2892	3012	2490
	3755	4057	3907	4242	3574	4710	3148	4443	4300	2737	3374	2976	3431	3697	3131		1564	1664	1926	1324	2888	2230	2076	2689	2408	1725	2439	1825	2067	1775		3294	2938	3145	3668	2861	2842	4184	2466	4171
	2963	3867	3066	3883	3526	5292	2333	4255	3997	2300	3029	2862	3129	3659	3790		2296	2040	1554	1210	2552	2232	1830	3036	2013	1768	2270	1890	1682	2054		3501	3417	3270	3452	3279	2240	3804	3027	3865
	3893	3784	4120	3963	3138	4578	2903	3734	3799	3051	3108	4062	3498	3625	4209		1949	1475	2099	1470	3099	1900	1708	2707	2128	1934	2096	1627	1791	1842		3350	3163	3262	3061	3895	3235	2858	3072	2818
	3433	2497	3159	3779	2800	3487	2790	3303	2854	3109	3953	4003	2383	3007	3835		2278	1399	2075	1819	2844	2792	1752	2856	1913	1527	2565	1996	2516	1912		2636	3530	2104	2851	3763	3089	3752	2201	3937
	3844	2627	3003	3750	3546	5215	3209	3178	3340	3158	3263	3879	2689	3631	4038		1104	1548	1253	1585	3176	2829	2426	2938	2437	1570	2599	2176	1854	1685		3183	2974	2246	2958	3743	3391	3600	2229	4131
	3826	3656	3211	2931	3635	4607	3404	3405	4195	2684	3908	3822	2788	3034	3383		1523	1668	1266	1195	3476	2836	2380	3054	2201	1548	2172	1625	2130	1653		3120	2684	2463	2944	2842	2149	2850	3135	3036
	3877	4020	4105	3326	4860	3876	3627	3010	4061	2762	3435	2992	3585	2818	2912		1640	1324	1823	1196	3038	2859	2579	2871	1898	1749	2491	1578	1892	2100		2420	3618	2192	3520	3001	3500	2611	2481	4063
	4204	3000	3391	3734	3731	5170	3330	4325	2695	2617	4794	2987	3107	3811	3418		2291	1215	2102	1556	3051	2687	2377	2979	2421	1843	2678	1697	1843	1812		3144	2961	1857	3266	3075	3478	2783	2499	4401
	3016	2506	3995	3744	3300	3777	2893	4296	2691	3861	4203	3133	2747	3720	4158		1499	1811	1852	1466	3108	2591	2163	2978	2165	1436	2578	1614	2008	1855		3217	3569	2838	3698	4098	3089	3811	3942	3357
	3322	3316	3904	3620	3375	3775	3669	4157	3834	3290	4206	3829	3024	3554	3119		1826	1716	2067	1295	3109	3055	1686	2636	1648	1441	2154	1546	1754	2547		3158	3568	2706	3208	3659	3413	3752	3636	3738
	3381	2655	3571	2943	2973	4767	3846	2965	4110	3026	4103	4154	3059	3191	3524		1599	1887	2107	1688	3417	3105	1357	2511	1681	1953	2066	1808	1570	1699		2428	3733	2260	3258	4113	2508	2814	3082	4284
	3397	2657	4031	4018	3647	4591	3411	4309	4416	2803	3147	4105	3947	3285	4323		1554	1464	1921	1719	3101	2470	1804	2503	1798	1772	2398	2099	1643	1531		3018	3650	2833	3905	2860	3216	2907	3075	3374
	3207	4149	4136	3849	4507	5196	4291	4353	2840	2626	3571	4122	3270	4005	4021		2157	1396	1340	1420	2947	2810	2635	2465	1738	1552	2717	1583	1540	1568		3306	3748	2710	3955	2765	3581	4181	2748	4364
	3903	3890	3158	3858	4431	3830	2813	3546	3289	2840	3716	3804	2698	4070	3134		1412	1300	1169	1608	3261	2999	1632	2069	1905	1359	2580	1722	2476	1879		2495	3202	3276	3449	3475	3265	3884	2330	3368
	4058	2962	2947	2951	3557	4978	3530	3990	2632	3347	4553	4047	3133	3910	4324		1263	1358	1285	1837	2829	2967	1766	2112	2442	1495	2188	1648	2123	1952		3171	3735	3196	3996	3897	2572	2908	3631	4227
	3979	2857	3400	3017	4347	5132	3002	3028	3838	2940	4488	4125	3480	3630	3799		1322	1910	1349	1470	3593	2450	1860	1956	1849	1570	2134	1620	1952	1676		2618	3863	2453	4110	3765	3322	4004	3685	4278
	3188	3943	3371	3362	3756	5047	3571	4454	4235	3437	4327	3486	3618	2676	3138		1932	1338	1152	1316	2331	2295	1678	2622	1701	1465	2009	1870	2020	1724		3380	3684	1960	2947	2796	3292	4110	2982	4453
	3608	3962	3805	3612	3980	4014	4195	4397	4006	3482	4107	2905	4077	2748	2935		1652	1171	1233	1197	2704	2070	2020	2412	1630	2033	1923	1941	1588	2092		3239	3457	1797	2683	3454	3563	4085	2594	3187
	3668	4109	4045	3654	2868	4108	3115	4324	2575	2751	2940	3602	2969	3102	3967		2384	1175	1212	1497	2466	2614	2307	2596	1523	1561	2216	1666	1725	1737		2423	3689	1842	3411	4316	3536	3139	2222	3384
	4161	3572	3850	3166	3172	3508	2709	4339	2938	2718	3000	3744	3004	3122	4162		1444	1234	1466	1516	2570	2660	1590	2366	1512	1651	2512	1490	1533	1754		2931	3155	2719	3257	3187	2467	2724	2333	4086
	3605	2544	3040	3339	3517	5300	3344	2684	3814	2890	2979	3896	2769	2991	2918		1334	1156	1637	1811	2567	2755	1761	2119	2063	1522	2007	1655	2159	2045		3206	3472	3078	2901	2925	3106	3135	2732	3314
	3402	3108	3046	3154	3095	4873	3333	2623	3769	2726	3295	3562	2688	3189	3151		1274	1786	1402	1285	2819	2901	2431	2224	2132	1574	1876	1614	1453	2415		2933	3141	3331	3679	3531	2555	2960	2328	2936
	3077	3226	3735	3278	3666	4042	2847	3965	3461	3103	2787	3648	3210	3273	3938		1772	1746	1630	1275	3040	2310	2448	2486	1628	1400	1863	1550	1469	1752		2180	3043	3031	3223	2784	3052	4048	2877	2941
	3013	2666	2850	2740	2794	4255	3053	4018	3157	2826	3882	3230	2593	2883	4013		1587	1299	1364	1184	3476	2163	2211	2865	1513	1700	1802	2028	1510	1388		2216	3537	2082	3609	2757	3021	3792	2389	3922
	2938	2627	3076	3820	3419	3576	3997	2989	3042	3469	4080	3477	2648	3407	3982		2208	1168	1372	1521	2377	1944	2045	2614	1757	2050	1983	2165	1669	1400		2327	2876	1688	2831	4003	2621	2783	2443	4197
	3394	2806	4060	3663	3392	4978	3892	3729	2881	2942	4112	3759	3859	3497	2647		1933	1484	1242	1320	2940	1969	1912	3064	1952	1600	2090	1572	2008	1567		3315	2790	1632	2787	3868	2499	3685	2163	3353
	3234	3652	2848	2499	2964	4821	3257	2568	3216	3191	2686	3075	2695	4110	3394		1586	1541	1703	1386	2952	2574	1759	1949	2099	2324	2221	1827	2105	1856		3203	3625	1693	3552	3544	2792	2962	2587	3481
	3955	2658	3096	2657	3959	3584	3366	4087	3138	2672	3570	2858	2879	3417	3377		1480	1379	1773	1195	3406	2841	1866	1936	1952	1749	2262	1559	1572	2149		2466	3019	2017	3350	2734	3097	4200	3185	2713
	3278	3092	3094	3671	2969	3861	3088	4119	2507	3101	2987	3560	3317	2906	3859		1338	1312	1670	1196	3096	2747	2483	1941	1813	1880	1890	1539	1633	1500		3259	3567	1722	3614	3457	3308	3175	3048	3530
	3818	2642	2965	3474	3526	4222	3754	2585	2781	2927	3718	3669	3245	3529	2954		1275	1901	1470	1074	2684	2862	2297	2152	1816	1763	2018	2087	1643	1799		2619	3177	1978	2934	3912	3107	3987	2624	3787
	3665	3403	3584	2940	2678	4423	3625	3136	3500	3162	2788	3963	4327	2956	2735		1355	1867	2075	1619	2064	2492	1793	1789	1816	1775	1815	1950	2258	1673		2489	3445	2452	3573	2909	3271	3041	2395	3048
	3459	3770	4204	3334	3112	4590	3038	4027	4313	3347	3141	2922	3205	3485	3773		1841	1662	1902	1695	2733	2322	2743	2740	2104	1391	1650	1813	1975	1635		3447	3280	2003	3486	3607	3596	3799	2470	3955
	3360	4017	2918	3521	3754	4640	3834	2991	2805	3185	3209	3232	3607	3995	3252		2089	1859	1751	1622	2696	2011	2324	2590	1957	1230	2118	2344	1992	1951		3361	3239	2771	4000	4170	3419	2987	3272	3708
	3779	3919	4296	3528	4329	3210	2936	3985	4001	2619	4661	3698	3538	3936	3546		1683	1723	1861	1442	1690	3101	2567	2711	1947	1247	2032	2098	2392	1731		3240	3705	2812	4053	4287	3585	4103	2715	4209
	3933	3678	4528	3817	4266	4439	2939	3012	4234	3217	4173	3877	3435	3590	3909		1803	1531	1952	1866	2359	3407	2285	2860	2076	1535	2439	1402	2090	1567		3406	3725	1907	3935	3850	3583	4306	2693	4000
	3618	3551	3724	3721	4564	4846	3427	2664	3842	2691	3621	2772	3316	3685	3775		2191	1693	1996	1353	1700	3205	1791	1924	2094	2035	2482	1905	2153	1986		3306	3769	2656	3922	2553	3397	4208	3377	3965
	3253	2353	2866	3412	4128	4476	3452	4177	4342	2812	3718	3276	3388	2422	3481		2229	1503	1619	1494	2136	3008	1701	1917	2399	1655	2085	1560	1567	1677		3312	3469	2696	3560	2717	3277	3820	2987	3364
	3467	2328	3331	3386	2894	4423	2711	4018	4109	3045	2836	3818	3679	2732	2784		1653	1329	1884	1766	1916	2449	1612	1798	1626	1397	1966	1743	1481	1880		3161	3382	2856	3412	2409	2301	3693	3243	2493
8h	2907	2292	4180	2436	3262	3057	2873	2843	3962	2383	2567	3496	2795	2553	2860	8h	1446	1469	1270	1568	1931	2139	1898	1565	1747	1311	1929	1693	1678	1715	8h	2374	2354	2861	2434	3050	3055	3376	3294	2779
	3535	2597	4417	2631	2920	2663	2745	2150	4270	2152	2699	3437	2544	2798	2614		1404	1174	1214	1358	1571	2831	1613	1611	2257	1264	2399	1502	1363	1380		2061	2872	2336	3240	2658	2965	2775	2404	2796
	3470	3758	3809	2659	3545	3063	3158	2265	4311	2459	2516	3523	3175	4114	4084		1834	2076	1133	1302	1615	2051	1794	1794	1877	1401	2030	1559	1588	1458		3197	2756	2145	2560	2642	2134	2670	2308	2701
	3382	3354	2767	2985	3745	3403	2859	4431	2314	3187	2773	3665	2770	3594	3740		2310	1858	1460	1749	1776	2038	1629	1975	1789	1405	1804	2161	1419	1531		2852	3425	1728	2929	3207	2250	2790	2095	3510
	3002	2216	2447	3878	2238	2982	2186	2918	2742	1988	2651	2420	2881	2566	2596		2114	1464	1062	1219	2053	1949	1478	2056	1676	1397	1750	1999	1533	2004		2249	2237	2804	3021	3590	3041	4395	2388	3756
	3225	2280	2804	3908	2397	3916	2347	2390	2713	2339	4084	2600	3275	2908	2331		1461	1171	1029	1090	2559	1680	1510	1555	1768	1390	1683	1555	1812	1519		2401	2400	2734	2743	2407	2172	2567	3413	2572
	3291	2314	2724	3366	2863	2934	2160	3050	2574	2226	3824	2312	2508	2511	2657		1330	1150	1543	1189	2713	1877	1428	1753	1517	1295	1568	1379	2007	1432		2403	2589	2152	3284	2357	2093	2315	3014	2752
	3137	3542	2311	2215	3752	2861	3952	2406	3818	3587	3501	3479	2605	3043	2728		1274	988	1152	1648	1932	2490	1180	1618	1404	1346	2137	1323	1473	1657		2452	2573	1674	2920	2021	2302	2640	2247	2507
	3038	3336	2445	2214	3857	4859	4175	3683	2551	2950	2583	3094	2529	2676	2354		1124	989	1538	1707	1998	2209	2063	1561	1439	1295	1945	1511	1583	1761		2155	3275	1797	2772	4168	3921	3317	2260	2783
	3414	3349	2468	2496	3228	4852	2709	2121	2384	2654	2827	2739	2320	2941	3415		1276	1550	1350	1816	2076	3383	2781	2740	1411	1859	1814	1679	1755	1455		2338	2657	1949	2689	3328	3044	2359	2232	2832
	2541	2471	3890	2769	2341	3378	2337	2488	2540	2285	2722	2418	2558	2627	3612		1842	1053	1429	1329	2228	2973	2286	2234	1242	1781	1766	1523	1419	1490		2364	2387	1892	2596	2800	2028	2556	2580	2636
	2400	2283	3308	2805	2914	3863	2677	2469	2580	2209	2714	2414	2623	2634	2807		2008	958	1998	1352	1596	2835	1612	2175	1381	1684	1639	1381	1582	1867		3130	2177	1697	2902	2731	2161	2061	2015	2647
	2324	2375	2475	2456	2526	3133	2617	3880	2617	2984	2704	2467	3529	3126	2540		2007	880	1295	1168	1725	2337	2032	1877	1475	1508	1503	1470	1532	1549		2066	2419	2764	3361	2526	2360	2560	2114	2806
	2452	2194	2584	2544	2517	2895	3567	2796	3536	2962	2876	2101	2952	2608	2633		1528	820	1218	1155	1901	1737	1662	1761	1628	1370	1635	2037	1962	1457		2290	2322	2823	2715	2612	2795	2585	2312	3257
	2649	2371	2589	2751	4104	2923	2523	2701	3208	3113	2574	2496	2751	2411	3211		1358	1042	1142	1095	3135	2675	1577	2267	1410	1432	1492	1715	1909	1571		2424	2332	2088	2725	2505	2397	4309	3600	3300
	3036	2213	2343	2457	2883	3803	2385	2646	2689	3020	2798	2588	2527	2772	2239		1305	808	1144	1076	3055	2068	2016	2405	1354	1487	1464	1377	1405	1542		2974	2818	1950	3723	2702	2450	3319	2516	2973
	2166	2471	2599	2312	2576	3036	2345	2495	2846	2989	4041	2526	2510	2702	2667		1325	1082	1067	1005	2133	1729	1640	1695	1318	1382	1489	1687	1376	1497		2981	2926	1796	2436	3567	1923	2464	2474	2552
	2381	2426	2424	2273	2591	3036	2405	2360	2442	2130	3651	2455	2365	2527	2654		1390	836	1021	1007	2560	1910	1452	1618	1226	1483	2032	1425	1514	2016		2156	2313	1866	2473	2160	2719	2488	2280	2702
	2456	2250	3550	2455	2339	3013	3750	3734	2857	2075	2800	2275	2043	2640	2446		1410	727	1025	1430	2132	2189	1485	1547	1441	1443	2099	1403	1746	1544		2370	2070	1899	2561	2715	2067	2574	2332	2519
	2133	2314	2416	2284	2486	4859	2493	2397	2530	2254	2791	3097	2638	2608	2530		1493	1485	1085	1710	2131	2308	1457	1510	1509	1757	2473	1481	1722	1626		2867	2367	1832	2856	2540	2143	2670	2345	2195
	2641	2317	2331	2769	2605	4069	2271	2507	2335	2343	2559	3204	3142	3394	2458		2194	1584	1084	1969	2041	2503	1781	1503	1596	1483	2267	1371	1519	1604		2267	2211	2454	2627	2523	2069	2264	2398	2827
	2631	3518	2341	2539	2432	3068	2230	2396	2583	2127	2920	2433	2325	2556	2363		2025	1391	1079	1260	2174	2432	1516	2243	1615	1556	2047	1697	1412	1552		2464	2163	2037	3058	2062	2234	2387	2520	3079
	2377	2382	2533	3262	2330	2954	2330	2340	2557	2960	2726	2390	2352	2361	2332		2258	1056	1911	1096	2030	1640	1279	1707	2005	1287	1628	1841	1617	1577		2293	2488	2041	2536	2784	2493	2690	2418	3255
	2386	2282	2333	2635	2575	3070	3122	2422	2571	2225	3324	2266	2288	2251	2363		1523	1214	1775	1188	2032	1751	2233	1697	1689	1306	1591	1489	1673	1566		2253	2089	2353	2592	2269	1875	2557	2214	2838
	2253	2279	2648	2477	3345	2725	2964	2358	2748	2065	3382	2214	2336	2438	2120		1420	1706	1950	1168	2047	1769	2325	1562	2025	1382	1537	1386	1699	2289		2973	2508	2868	2608	3237	2138	2454	2399	2544
	3021	3692	3976	2566	3389	2690	3451	2318	2819	2254	2893	2263	2269	2353	3346		1396	1461	1282	1062	2564	2807	1660	1709	1646	1334	1530	1381	1555	1758		3289	2237	2589	2658	2376	3099	3460	2474	2484
	2708	2261	3488	2287	2352	2809	2898	2454	2322	2193	2667	2316	2801	2617	3010		1725	1176	1191	1142	2875	2615	1970	2035	1507	1350	1595	1979	1537	1554		2149	2193	1732	2941	1919	1830	3016	2235	2503
	2431	2323	2624	2474	2384	2742	2738	2400	2312	1975	3576	3324	2432	3630	2266		1532	1262	1783	1906	2402	1873	2186	1884	1586	1789	2085	2013	2308	1639		2262	2375	1940	2648	2406	2319	2788	3187	3215
	2326	2397	2306	2464	2568	4110	2284	2760	2726	1862	2478	3353	2324	3272	2742		1794	1401	1630	2021	1910	2015	1674	2307	1791	2014	1818	1664	2043	1613		2096	2153	1890	2806	2544	2122	2772	3088	3735
	2576	2419	2401	2474	2415	2819	2887	2476	3383	2978	2805	2554	2265	2761	2416		2279	1196	1501	1392	2095	2382	1500	2161	1806	1723	1721	1594	2123	1478		3124	2042	1953	3350	3670	2248	2564	2321	2420
	4318	2297	2305	3465	3002	3214	2561	2337	2771	2286	2659	2451	2103	2578	2316		2049	1419	1328	1553	2589	1670	1315	1566	2134	1415	1617	1475	1506	1895		3428	3994	1629	3308	3446	1797	2560	2295	2356
	3703	2459	2738	3910	2871	2934	2705	3456	2746	2177	2436	2139	2651	2386	2542		1371	1193	1266	1211	2201	2090	2037	1717	2243	1348	1701	1817	1537	1968		2691	3284	2413	2702	2271	2201	3283	2328	2322
	3231	3954	3620	2630	2447	2817	2689	3581	2519	2247	4275	3116	3542	2503	3526		1347	1584	1384	1205	2451	1548	1605	2049	1869	1570	2366	1713	1452	1603		2281	2772	2034	2414	2559	2902	2534	2458	2285
	2461	3873	2519	2754	2312	2981	3262	2949	2063	2078	3577	3508	3560	2786	2443		1439	1397	1238	1336	2052	2027	1632	1966	1691	1377	2859	2121	1591	1515		2324	2306	1908	2444	2292	3275	2703	2108	2846
	4784	3533	4529	3117	3682	4231	3906	2501	2962	4524	4718	3308					2207	3180	1608	1845	1862	1235	1641	2193	2585	2238						3842	4455	3533	3309	2951	5789	3252	5196
	3979	3195	4040	3937	3850	3615	3453	4622	4107	3816	3741	4838					3173	3095	2927	3212	1679	1259	2731	2112	2295	1498						3425	3885	3195	4113	4128	5425	3223	4403
	3022	2155	3550	3625	3159	4018	3362	4135	3533	3537	3609	4201					3154	2921	2700	3136	1391	1265	2413	1513	2020	1472						3114	3513	2155	3810	3659	5368	2936	4269
	2986	2807	3732	3300	3943	3845	3196	4085	3602	3034	2993	3790					3034	2658	2296	3040	1432	1636	2370	1377	1538	2392						2151	3574	2807	3753	3712	4722	2885	4110
	4568	2771	2988	3293	3030	3155	2383	3119	3820	2490	2840	2814					2646	2845	2852	2357	1122	2099	2833	1547	1165	2517						2707	2881	2771	3523	3334	3481	2104	3147
	3503	2528	2832	2473	3875	2908	2628	3251	2555	2805	2892	3702					3037	2364	2980	2645	1129	2188	2787	2142	2086	2482						3359	2796	2528	2620	2551	4838	2429	2807
20h	3322	4072	3699	4086	2831	3290	2634	4067	2803	3034	3597	2586				20h	2674	2699	2558	2336	1130	2229	2712	2394	1234	2469					20h	2590	3256	4072	3554	3391	4734	2493	3951
	3661	3695	3440	2879	3951	4136	3615	3462	3422	3917	3569	2850					3168	2464	2133	2317	1903	2131	1933	2541	1515	1927						3098	3588	3695	3637	3390	5062	2687	4160
	4134	2809	3646	4292	2902	4041	3374	3109	3367	3323	3070	2953					2704	3078	2623	3259	1477	1889	2153	2257	2245	1568						3125	3761	2809	3247	3458	4467	3108	4290
	4451	4069	3951	3898	3913	3284	3717	3423	3638	3545	4015	3743					3388	2553	2578	3303	1119	1361	2660	2414	1308	1770						2541	3979	4069	3214	3577	5420	3112	4008
	4716	3468	3931	3965	3331	3222	2995	2757	2794	3132	3423	3722					2955	2725	3147	3315	2829	1524	2588	2175	2557	2568						2655	2843	3468	3891	3433	4313	2899	3969
	4510	3475	4235	3950	3206	4068	2594	3210	3281	3468	3640	4069					2748	2545	2666	3469	2592	1628	2875	1802	2725	2640						3210	3519	3475	3069	3254	5630	2186	4078
	3790	3480	3634	3089	3196	3914	3275	3219	2743	3352	3714	3822					2560	2367	2011	2858	2388	1566	2354	1491	2549	2152						2654	3921	3480	3202	3518	5024	2403	3032
	4579	3583	3626	3651	3923	3912	2658	3316	3096	3398	2819	3403					2171	3144	2684	3344	1660	1686	2096	2430	2425	1562						2944	2650	3583	3890	3226	4222	2183	2850
	4215	3718	3703	3368	3883	3976	3585	3830	2780	4092	3327	3295					2604	2171	2559	2793	2209	1656	1970	2468	2037	2454						3051	3674	3718	3516	3291	5015	2658	3344
	3861	2886	4491	3570	4104	3700	2800	3162	2984	3787	3221	3324					2497	2166	1931	2866	1773	2564	2548	2349	2102	2578						2989	3814	2886	3068	3749	5191	2769	3123
	3670	2719	4354	3874	3906	4126	2788	3017	3811	2973	3604	2988					2672	2033	2607	3362	1965	2505	2637	1103	1722	2554						2797	3097	2719	2761	3161	4544	2196	4339
	4023	3323	3210	3699	2677	3975	3079	2750	3002	3502	3124	3467					2268	2923	1460	3123	1589	2084	2672	2464	1651	1690						2653	3513	3323	3674	3447	5127	2432	3314
	4032	3834	3323	2427	3238	3704	3130	4084	2863	3433	3235	3382					1862	2135	1931	2829	1776	1485	1931	2118	2409	1804						3345	3283	3834	3212	3306	5557	2488	4154
	3709	4037	3834	3499	3171	3570	2763	3410	3544	3548	3674	4066					1842	2632	2529	2895	1597	1537	2342	2089	2541	2525						3386	4009	4037	3317	3424	5467	2212	3156
	3392	3725	3392	3262	3222	4213	2805	2680	3867	3970	4016	3751					2898	2715	2873	3259	2104	1535	2038	2411	2584	1790						2605	3965	3725	3191	3615	4349	2848	3497
	3344	2960	3644	2650	3542	3572	3130	4095	3550	3654	3574	4394					1770	3015	2031	3019	1511	1545	2083	2363	2079	1947						3341	3878	2960	3285	3859	4394	2316	3824
	4223	4014	4379	3415	3842	3563	2804	3792	3067	3039	3091	4375					1857	2191	1988	2361	1592	1441	2101	2367	2488	2387						3359	3818	4014	3291	3048	4778	2719	3578
	4443	4104	3753	3324	3355	3533	2923	3870	3777	3720	3080	3962					2012	2629	2113	3099	1648	1466	2005	2457	1790	2553						3018	2979	4104	3044	3120	4705	2262	3491
	4029	4137	3492	3681	3812	3750	3809	3325	3900	3328	3239	3661					2598	2300	2573	2722	2084	1525	2484	1960	1878	2570						3266	3297	4137	3116	3599	5105	2774	3376
	3655	2917	3581	3777	3429	3457	3863	3070	4017	3892	3553	3576					2546	2642	2150	2828	1994	1788	2819	2333	1888	2009						3140	3213	2917	3700	3795	5322	2160	4117
	3575	3096	3260	2924	2927	3315	3658	3428	3100	3976	3196	4079					2019	2882	2047	2400	1646	2035	1826	1915	1942	1793						2404	2956	3096	4029	3171	4037	2018	4499
	4526	3523	3738	2724	3705	4197	2423	3836	3084	3986	3746	3752					1720	2621	1914	2085	1539	1722	1891	1796	2482	2140						3186	3650	3523	3946	3050	4579	2227	4368
	3972	3062	3125	4078	3445	4300	2497	3811	3322	3875	3323	3284					2656	2511	2947	2940	2235	2174	1902	2040	2509	1844						2737	3839	3062	3881	3412	4860	2997	3582
	3526	2976	3190	3627	2932	3827	2204	2883	3189	3006	2999	3553					2603	2880	1900	2887	1627	2422	2373	1783	2569	1858						2893	3697	2976	2666	3393	5162	2314	3577
	3408	3899	3253	3378	3390	3222	3190	3784	3147	3685	3895	3123					2085	2318	2369	2317	1651	2249	2481	1737	1827	1887						3164	3556	3899	2738	3677	4640	2067	3652
	3378	3014	3850	3614	3255	3474	2336	3203	3623	2878	3010	3049					2114	2683	2047	2342	1834	1985	2087	1782	1769	2669						3126	3095	3014	3696	3021	5682	2127	3924
	3522	3530	4098	3381	2708	3666	2388	3808	3368	3329	3992	3888					1784	2600	2491	1884	1565	1449	2004	2342	2310	2660						3067	3449	3530	3071	3176	5167	2031	3512
	3570	2861	3610	4363	3413	3404	2192	3488	3718	3504	3723	3294					2256	2408	2218	2500	1622	1421	1926	2087	1830	2580						2395	3033	2861	3182	3194	4499	2568	4016
	3493	3592	4194	2938	2793	3863	2527	3025	3283	2816	3277	3990					1630	2839	1935	2542	2092	1476	2409	1752	1877	2383						2575	3867	3592	2915	3110	4404	2170	3318
	3607	3081	3407	3557	3318	3754	3112	3540	3637	3347	3542	3503					1847	2603	2699	2202	1723	1446	1876	1704	1883	1889						3323	3265	3081	2869	3057	4393	2816	3834
	3184	2756	2997	3954	3414	3998	2516	3176	3096	3084	3042	3451					2704	2412	2314	3022	1719	1297	1814	2149	2500	2612						2885	3285	2756	2770	3513	4523	1933	3383
	4048	2813	3668	2947	2585	3781	2915	3540	3380	3122	3825	3925					1647	2756	2078	2392	1664	1557	1831	2464	2633	1716						2581	3272	2813	2736	3313	4637	2793	3166
	3227	3046	3507	3647	2755	3802	2454	3837	3132	3304	3475	3193					1897	2213	2510	2863	2188	1654	1868	2126	2012	2445						2597	3329	3046	3449	3343	4259	2572	3703
	4156	2774	4042	2935	3332	3424	2667	3961	3243	4005	3398	3429					2294	2770	2525	2143	1550	1560	1779	2304	2424	2701						2841	3246	2774	3013	3334	4711	2438	3427
	3471	3499	3302	3822	2799	4312	3310	3769	3496	2870	3864	3471					2824	2466	2353	2390	1632	2384	2373	1991	2554	2455						2948	3317	3499	3767	3267	4308	2311	3082
	4722	3969	3970	3584	3471	4157	3194	3313	3362	4044	3287	3824					2608	2341	2508	2895	1601	2190	2569	2375	2244	1996						3351	3817	3969	2830	3601	4611	3231	3663
	4291	3071	3238	3318	3115	3629	3295	3165	3450	3483	3269	4049					2088	2542	1908	2516	1924	2024	2508	1888	2407	1800						2537	3200	3071	2993	3212	5749	2207	3732
	3224	3746	3201	3901	3717	3184	3278	3844	3282	3495	2903	2938					1888	2371	2241	2442	1949	2138	2027	1891	1701	2458						2923	3518	3746	3481	3267	4344	2966	3235
	3856	3851	3437	4125	4168	3797	2778	4099	3458	3747	3791	4119					2481	2943	1893	3104	1598	1548	2599	1912	1770	2212						2330	3394	3851	4096	3643	4844	2759	3838
	3790	3540	2530	3784	2836	3925	2885	3470	3805	3128	2795	3779					2667	2108	1772	3043	2264	1576	2433	2329	1839	2488						2838	3227	3540	3770	3369	4756	2037	3649
8h	4157	2881	4066	2370	3550	3569	2948	3054	3039	3020	2835	3052				8h	1596	2607	1378	2303	1664	1571	2320	2159	1859	2478					8h	2512	3474	2881	3652	3022	4619	2482	2842
	3297	3323	3169	3381	3081	3304	3511	4130	3257	2996	2875	3405					2221	1909	1840	2335	1665	1404	1975	1789	1984	1828						2564	2765	3323	2564	3159	4516	2749	2618
	3644	3087	2916	3055	2726	3636	3216	3113	3544	3616	3129	4132					1928	2165	2299	2198	1680	1511	1850	1847	1941	1810						2788	2832	3087	2970	3617	3906	2851	2621
	2836	2814	2736	2821	2821	3497	2134	3049	3216	3637	3350	4377					1839	1878	2267	2711	1800	1791	2238	2222	1664	1764						2957	3067	2814	2871	2816	4333	2024	2924
	3596	2783	2787	2192	3251	3742	2667	3115	2747	2260	3449	3973					1916	2005	1925	2494	1969	1889	1871	1605	1743	1813						2654	3286	2783	3971	2721	4321	2182	2590
	3801	2979	2604	3116	2732	3439	2147	2713	3545	2569	3004	3049					2546	2761	1985	2037	1721	1399	1903	1580	2364	1896						2330	2580	2979	3687	2695	4319	2315	2683
	3393	3638	3945	3073	2732	3331	3623	4198	3114	3205	3853	2854					1674	2836	1691	1876	1689	1495	2280	1640	1883	2390						2179	2581	3638	2745	2244	5170	1922	2698
	3217	3248	3340	3410	3367	3842	2390	3142	3131	2423	3280	2969					1970	1718	1963	2161	1747	1580	2457	1636	1683	2315						3126	2640	3248	2991	2680	4441	2621	3700
	3449	2750	2791	2914	2724	2943	2456	3076	3587	2304	2813	3534					1685	2103	1996	2825	1574	1769	1734	2163	1733	1684						2474	3575	2750	2811	3483	3329	2455	2792
	2875	3706	3331	3036	2797	2886	2161	2911	3666	3464	3621	3939					1583	1810	1889	2600	2131	1487	1692	1585	2218	1738						2721	2537	3706	2640	2462	3702	2192	2705
	3384	3197	3115	3248	2607	2746	2150	2919	2692	2551	3009	2900					1883	1890	1848	1718	1917	1920	1536	1476	1695	1794						2332	3147	3197	2407	2826	3841	2577	3875
	2574	2806	2361	3188	2994	3828	2254	3605	2349	2345	2645	3488					2288	1925	1910	1988	1558	1466	1606	1762	1899	2327						2368	2561	2806	2858	3031	3740	2061	3023
	4076	3009	3714	2683	3932	2937	2189	3951	3387	2929	2886	4014					1445	2038	1757	1781	1793	1328	1608	1664	1819	2299						2797	3979	3009	2829	2556	4045	2086	3554
	3418	2932	2914	3081	2725	3606	3392	3743	2783	2820	2999	3411					1861	1760	1959	2067	2122	1552	1745	1674	2037	1852						2393	2525	2932	2870	2929	4383	2764	2679
	2966	3061	2796	2845	2920	2548	2478	3921	2915	2732	2493	3106					1775	2213	2842	2034	1608	1589	1573	2289	2160	1834						2222	2754	3061	3519	2937	4197	1919	3017
	2999	3043	2940	3266	2744	4082	2434	2989	2704	2541	2363	2985					1880	2464	2642	2770	1651	1612	1648	1788	1776	1916						2935	2516	3043	2952	2674	4035	2156	3698
	3055	3461	2906	3030	2929	3394	3716	2914	2659	3275	2733	2973					1796	1896	2567	2777	1681	1936	2411	1877	1779	1900						2914	2417	3461	3112	2541	4165	2192	3962
	2958	3089	3980	2186	3859	2466	2435	2813	2456	2621	2983	2984					2331	1804	2697	1795	1663	1956	2478	1995	2271	1754						2753	3520	3089	2428	2384	3626	2066	2862
	2795	3215	2756	2901	2767	2859	2719	2696	2656	2362	2333	2776					1554	2034	1920	1997	1986	2177	1858	1526	2173	2078						2761	2797	3215	3024	2335	3662	2118	2753
	2935	3343	2433	2515	2687	3866	2115	2737	2498	2587	2836	2783					1519	1951	2116	2040	1882	2041	1607	1672	1960	2486						2495	2857	3343	2667	2531	3793	2383	2800
	4053	3508	2526	3088	2602	2527	2581	2605	2589	2815	2666	2864					1757	1829	2485	2825	1610	1416	1507	1761	2355	1743						2124	3625	3508	2898	2546	3230	1927	3842
	3423	3011	3403	2412	2950	2729	3173	2760	3257	2675	2500	4031					1893	2035	2063	2553	1675	1550	1613	1789	1687	1793						2466	2542	3011	3180	2862	4467	1961	2944
	2785	3052	2854	2633	2778	2763	2350	4123	2711	2378	2899	2808					1706	2277	2617	1879	1803	1536	1500	1825	1824	1823						2451	2529	3052	2930	2641	3885	1923	2601
	2983	3082	2680	3377	2357	2567	2242	3830	2568	3609	2452	2755					1914	1716	2110	1860	1704	1386	1905	2133	1780	2412						2659	3518	3082	2828	3093	4150	2030	2990
	3577	3390	3677	2622	2543	2667	2223	2690	2937	2687	2468	2763					2584	2115	2021	1967	2112	1563	2331	1690	2379	1842						2123	2753	3390	2877	2961	3521	2021	2485
	3236	3227	3593	2744	3808	2941	2922	2855	2644	2703	2466	3280					2562	2356	2485	2428	1622	2031	2215	1523	1663	2357						2609	2629	3227	2893	2402	3754	2044	3003
	2699	2809	2634	3039	2865	2695	2415	2645	2525	3352	3084	2969					1750	1753	2248	2501	1662	1611	2299	1604	1809	2513						2943	2837	2809	2840	3320	3564	2398	2994
	3553	2751	2410	2279	2871	3105	2601	2622	2627	2862	2508	2613					1513	1807	2507	1901	1801	1471	1684	1732	1759	2408						2389	3622	2751	2718	2512	3314	2160	3543
	3279	3097	2623	2673	2635	2887	3056	2744	2757	2632	2776	2842					1924	1761	1893	2040	2130	1818	1529	2022	1786	1672						2615	2528	3097	2848	2610	3818	2131	3122
	2843	3526	2421	3501	2704	3580	2703	3685	2670	2658	2671	2911					1950	2518	2025	2133	1608	1908	1573	1708	1764	1721						2370	2776	3526	2600	2315	3691	2195	3690
	2794	2789	2479	2710	2514	3815	2130	2974	2717	2322	2688	3642					2505	1818	1873	2619	1824	2190	1696	1543	2364	1717						2166	3015	2789	3389	2734	4368	2585	3231
	3747	2822	3033	2750	2928	3052	2897	2682	2632	2452	3044	2848					2071	1913	2376	1983	1826	2179	1597	2266	1650	1787						2525	2909	2822	3594	2839	3874	2610	2651
	2739	2879	2678	2557	3051	2909	2553	3943	2814	2835	2957	2863					1820	1705	1929	2029	1960	1531	1508	1984	2108	2062						2938	3738	2879	3416	3659	4895	2079	2966
	3157	3708	3050	2529	2885	3544	2283	3680	3419	2648	2598	3028					1766	1788	2015	2051	1702	1593	1871	1562	2529	2365						2545	3015	3708	2848	3011	4808	2091	2821
	4909	2932	4169	4308	3506	3330	3408	2926	3720	2974	3958	3880					3070	2561	2844	3470	1894	1158	2130	1474	2324	2236						3711	4192	2927	3759	3684	4967	3021	4732
	4433	3160	3179	4148	2550	4250	2830	4203	3113	3822	3460	4359					3124	2765	2940	3458	2388	1230	2339	1740	2280	1936						2830	3015	3649	3444	3100	4012	2931	4206
	3212	2902	2975	3593	3662	4221	3348	3516	2813	2971	2529	4142					2657	2486	2712	2244	1801	1614	1864	1531	1737	2533						2783	3080	3252	3326	3436	4026	1937	3470
	4194	3620	2862	2802	2786	3607	2941	3816	3669	3268	3660	3581					2233	2302	1975	3044	1692	1523	2187	1887	1710	2221						2757	2791	2884	4029	3789	4460	2673	4204
	3502	2845	3427	3122	3615	3282	3200	3107	3531	2869	2842	4375					2622	1813	2512	2400	1784	1576	1872	2094	1845	1621						2545	3099	3923	3000	2890	4459	2469	3264
	3250	3976	3715	3328	2640	3527	2595	3168	3445	3413	3105	3232					2942	2488	2203	2152	2228	2138	2202	2254	2349	1969						2505	3127	3614	3352	3723	4096	2244	3261
20h	4144	3133	3517	2986	3863	3246	2587	4057	3144	3098	3640	4469				20h	2332	2576	1895	2976	2180	1625	2502	2255	2459	2144					20h	2725	3087	3999	3473	3588	4947	2575	3447
	3863	3592	4253	3797	3732	4755	3598	4061	3943	3903	3292	4439					2358	2120	2916	3035	1615	2127	2059	1915	2296	2673						3396	3952	3627	3384	3045	5245	3277	3969
	4827	4663	4084	4646	3519	4405	3684	3845	3623	3546	3905	4303					3111	2485	2937	2952	1885	1729	2545	2323	1901	2026						3428	4171	4114	3921	3771	5941	3250	4403
	4081	4138	3932	4447	4021	4477	3800	4415	3784	3913	4335	3436					2976	2708	2315	2995	2239	2161	2512	2130	1843	2539						3239	3316	4202	3437	4017	5524	2263	3862
	4501	3843	3664	3946	4169	3857	3574	4554	3727	3529	3956	4500					3174	2546	2762	3283	1995	2342	2655	2318	2647	2445						2174	2963	4203	4070	3464	5204	2270	4101
	4433	3427	3723	2899	4356	3308	2824	4107	3237	3136	3882	4199					2982	2587	2543	2777	1644	1612	2292	2092	2412	2508						3525	3257	3799	3994	3197	4255	2309	4542
	3594	4293	4019	3830	2408	3569	3142	3555	3945	3902	3502	4455					3052	2664	2149	2588	2050	1527	2330	1985	2011	1869						3303	4018	4090	4011	3879	4884	3179	3967
	3845	4441	4152	4224	4220	4146	3592	4475	4135	3890	3827	4654					2494	2813	2497	2987	2368	2189	2676	1958	2628	1736						2311	3875	4192	3868	3420	5597	2890	4220
	4561	4628	3409	2409	3386	4235	3577	4509	3475	3732	3374	4467					3064	2417	3027	2688	1731	2152	2824	1129	1996	1851						2468	3622	4133	3227	3139	3936	2263	3347
	4438	4521	4168	3170	3452	4459	3398	4155	3389	3689	3491	3444					2010	2667	2113	3196	2280	2096	2721	1550	1895	2403						3088	3125	4094	3460	4046	4978	2644	3287
	3697	3869	3725	3739	3045	4512	2822	4121	3845	3589	3868	4321					2024	2970	2428	3438	2309	1632	2645	2116	2670	2412						2838	3161	3650	3398	3984	4400	2207	4394
	3516	4414	4551	3413	2996	3655	3207	4184	3903	4267	4214	4320					2277	2802	2728	3285	1745	2195	2522	2101	1845	1902						3123	4074	4377	4099	3555	4260	2260	3402
	3606	3942	3719	2970	4257	3387	3628	3902	3843	4034	3922	4405					2950	2680	1999	2819	2141	2348	2680	2329	2034	1860						3459	3374	4367	3628	3807	5261	2871	3935
	4503	4177	4122	3517	4034	3530	3721	3505	3767	3875	3837	3779					1864	2273	1949	3270	1605	2174	2335	2042	2744	2286						3155	3698	4152	3296	3493	5205	3056	3810
	4547	4525	3470	3570	3678	3900	3389	4147	3697	3496	3285	3728					2766	2397	2150	2734	1721	2294	2723	1723	2330	2633						2514	3656	3511	3913	3878	4326	2970	4339
	4546	4337	4279	3812	3189	4217	3093	3557	3221	3358	3192	4758					2522	2830	2479	1950	1726	2237	2729	1666	2504	2644						2700	4216	4373	4378	3609	4815	2090	3804
	3444	3337	4567	4024	2796	4057	3441	3520	4232	3757	3754	4722					2433	2942	2386	2870	1850	2221	2739	1677	1945	2445						2746	3307	3329	4072	3509	4331	2058	4165
	4232	3603	2943	2938	3987	4231	2992	4047	3805	3011	3596	3627					2262	2934	2171	2687	1599	2367	1963	1881	1789	2722						3468	2846	4408	2919	4026	4520	2256	4477
	4387	4222	4351	3225	2975	4437	3013	4081	3612	4001	3580	4429					1954	2770	2233	1925	1602	2107	2416	2207	2416	2584						3258	4018	4134	3250	4097	5758	2816	3331
	3952	3890	4175	3169	3120	3096	3427	4221	3817	3904	3924	3780					2072	2823	1563	2759	1976	2012	2198	2115	2399	1712						3204	4141	3577	3744	3983	5467	2128	4194
	4184	4401	4603	4182	4404	3571	2688	4467	3237	3482	3873	4526					2420	2808	1940	2446	1737	1491	2632	2065	1878	1713						2320	3057	3542	2824	3301	4456	2417	3659
	4091	4000	3931	2577	4003	3408	3232	4298	3228	3127	3600	4015					1859	3102	1771	2072	1411	1441	2438	2039	1755	1777						3226	3438	3894	3914	3448	5195	2299	3836
	4227	3191	3962	3708	2676	4289	3362	3545	3043	3056	3394	4097					1918	2849	2531	2057	1400	1458	1806	1865	1786	2462						3262	3338	3853	3004	3209	4514	2418	4010
	4524	4577	4351	3421	3613	3571	2712	3572	3345	3510	3499	4542					1972	2417	2494	2996	1433	1614	1859	1645	2567	2226						2674	3274	3417	3242	3327	4161	2953	3085
	4322	4289	3395	3996	3096	3709	3007	3467	3138	3688	3667	3714					2382	2754	2026	2059	2253	1512	1896	2211	1632	1840						2669	3556	3854	3796	3561	4402	1976	3128
	4111	3903	3314	3537	3678	2625	3046	3483	3641	3184	3169	4436					1786	2462	2143	2685	1668	1523	1946	1548	1766	1944						2981	3677	3464	3410	3868	4799	2100	2851
	4216	2950	3695	3018	3277	2551	3575	3330	3410	3831	3395	4329					1772	3342	1935	2485	1476	1643	1950	2124	2546	2608						2318	3359	3734	3701	3053	4272	2183	4061
	4128	3521	3700	3500	2969	3075	3182	3655	3612	3299	3528	4095					2532	2849	2019	1872	1550	1696	2234	1643	2518	2648						2443	3591	4260	3431	3411	4425	2561	3906
	2833	3024	3539	2915	3429	3030	2747	3867	3206	3918	4074	4404					2566	2267	1880	2267	1674	2373	2901	1846	2460	2567						3078	2965	3322	3759	3229	3832	2793	3330
	4134	3813	4272	2332	3469	3270	3492	3726	3195	3366	4563	4113					1466	2825	1676	1885	2152	2049	2571	2138	1846	2514						3201	3352	3821	3594	3100	4370	2183	4146
	4420	3310	4438	3385	3961	2922	2932	3698	3351	3551	3179	3877					1770	3029	2720	2036	2306	2254	2770	2084	1844	1903						2739	2995	3612	3615	3404	3805	2389	4034
	3946	4079	3298	3493	3985	3966	3514	3941	3688	2966	3819	4410					2210	3230	2049	2548	1760	2093	1879	2134	1824	2565						3535	3336	3727	3440	2898	5057	3015	3620
	3689	4342	3408	3774	3266	3399	3483	3624	3713	3592	3743	4082					2928	2639	2152	3243	1669	2409	2278	1650	2593	1850						2383	3389	4183	3611	3498	5096	2715	4318
	3708	3093	3933	2807	3852	2801	3800	3328	3416	3544	3458	4182					2798	2239	2603	2250	1574	2207	2555	2148	2631	1677						2962	3269	4361	3698	2972	4266	2828	3198
	3477	2967	3852	3579	2970	3882	2878	3397	3094	3202	3898	4151					1974	2175	2051	2159	1584	2139	2635	2313	2253	1847						3648	3625	4359	3364	2971	5164	3140	3968
	4668	3567	3934	4161	4391	3269	3609	4106	3343	3697	3223	4146					1825	2063	2215	2199	1903	1510	2629	2009	2173	2669						2998	4457	4399	3948	3446	4282	2206	3990
	4187	4325	3250	3890	2899	3956	3450	3695	3269	3255	3709	3693					2029	2597	2272	2849	2197	1446	2273	2284	2680	2558						3343	3611	4273	3437	3612	4823	2447	4083
	3893	3325	3470	2968	4371	3421	2511	4434	3635	3674	3709	4218					2009	2016	2653	3081	2317	1464	2228	2232	2594	2659						3781	2964	4237	3645	3625	4660	2291	4089
	3858	3875	2877	3767	4164	4418	2290	3800	3221	2960	2787	3957					2217	1840	2782	3328	2006	1578	2767	1650	2046	2008						3410	3634	4578	3779	3996	5277	2989	4197
	3826	3128	3756	2414	3999	3017	2439	3523	3194	3951	3770	4071					2686	1767	2158	2473	1564	1439	2509	2227	1713	1686						2498	3856	4486	2904	4104	3695	2131	3484
8h	3321	3006	3792	4769	2223	3013	3283	3644	3754	3998	2985	3951				8h	2729	2077	2851	3199	2067	1551	1951	2145	1821	1840					8h	2682	2565	3477	2896	3784	5361	2056	2997
	3732	3609	3544	4332	2856	3772	2249	3274	3273	3697	2964	3828					1847	1825	2861	2357	2243	2179	2566	2157	2174	1847						3162	2551	3386	3033	3761	4395	2077	3096
	3323	2914	4362	3505	2721	4167	2215	3235	3166	3802	2822	4554					1789	1923	2549	2378	1681	1572	1852	1548	2012	1887						3068	2576	3325	3142	3345	4035	2297	4186
	4048	3021	3376	2390	2742	3131	2292	3151	3339	2901	2991	4141					1938	1908	1892	2284	1715	1388	1811	1645	1706	2399						2755	2858	3558	3910	2763	3678	2019	3113
	3864	3156	3253	3233	2865	3711	3373	3467	2948	3229	3825	3523					2035	2482	2531	2191	1810	1502	1907	1962	1795	2412						2575	2846	3626	3553	3238	3968	3079	2998
	3176	3345	2941	3516	4333	2894	2330	3128	2807	2902	2860	3991					2852	2547	1991	2336	2324	1409	1743	1537	1825	2278						2890	2944	3045	2741	2758	3934	2028	3976
	2671	2967	3427	2713	2908	2744	2314	3940	2608	2599	2798	3985					2485	1795	1790	2077	2077	1473	2722	1833	1790	1705						2581	2632	3177	2854	2866	3772	1951	3161
	3628	2993	2705	3124	3467	2771	2325	2823	2793	2576	2816	4078					2056	1917	1761	2277	1568	1544	2413	2085	1752	1780						2355	2240	3560	2747	3255	4369	2129	3072
	4161	3127	3177	2634	3394	2942	3029	3567	3843	3204	3027	2802					1908	1938	2471	2155	1642	1617	2468	2066	1701	1775						2249	2655	3100	3892	2705	4168	2834	3233
	3881	2762	2729	2782	2998	3030	2261	3020	2553	2657	3483	2511					2154	2115	2144	2709	1416	1357	1774	1842	1593	1712						3111	2793	3029	2662	3365	3707	2513	3183
	3312	2797	2475	3347	2473	3437	2207	2974	3153	3211	2822	3247					2068	1942	2522	2565	1505	1391	1853	1669	1750	2325						2115	2861	3102	3567	2780	4624	2135	2807
	3368	2707	2487	2468	3806	4252	2118	2975	2694	2834	3182	3017					2117	2685	1512	1898	1911	1579	1799	1734	2482	2596						2924	2672	3621	2589	3273	4019	2504	3053
	3663	3868	3094	3079	2835	2807	2524	3773	3530	2711	2905	3426					2428	1766	1866	2237	2057	1862	2320	1722	1658	2339						2381	2294	3339	2605	2979	4420	1930	3565
	3532	2722	2472	2440	2977	2958	2586	4052	3794	2671	3223	3572					2416	1827	2189	2042	2009	1693	2363	1940	1709	1638						2676	2670	4637	2934	2682	4675	2127	3060
	3644	3089	2576	2315	2881	2944	2329	3018	2783	2517	2649	3120					1962	1856	2200	2310	1403	2083	2463	1715	1981	1649						2549	2758	3381	2756	2596	4021	1987	2856
	3031	3530	3431	2243	2838	3615	2450	2722	2622	2465	2395	2964					2496	2113	1645	1817	1673	1569	2320	1990	1783	1787						2340	2833	3590	2665	2831	3713	2690	3234
	3825	2743	2743	3359	2771	2738	3142	3139	2783	3256	2841	3216					2010	2219	1865	2229	1704	1397	1796	1783	1865	2181						2308	2970	2927	3018	2504	4675	2034	3763
	3998	2643	3079	2734	2624	3479	2186	4164	3299	3448	2811	3752					2150	2766	1917	2284	1557	1600	1824	1870	2144	2456						2925	2302	3684	2745	3108	3668	2029	3854
	3287	2680	2494	2603	3386	3744	2398	3268	3465	2433	3203	2715					2315	2647	1846	2864	1693	1581	1874	2127	2489	2179						2642	2955	2902	3607	3119	4422	2813	3067
	2883	2662	3546	3430	2624	3106	2246	2997	3109	2314	2606	2957					2591	1788	2260	2777	2308	1650	1938	2051	2298	1835						2406	2765	3744	2699	2856	4357	1818	2802
	2964	4246	3079	2805	2819	2951	2238	3262	3123	2489	3135	2873					1824	1717	1752	2050	1783	1513	1989	1711	1494	1766						2567	3220	3674	2867	2455	3589	2068	4001
	4298	2641	3101	3082	2632	3406	2238	2764	2627	2464	2758	3057					2072	1838	1831	2325	1555	1954	1824	1790	2286	2244						2736	3047	3014	2722	3411	4597	2018	3152
	3280	2572	2568	2666	2529	2925	2227	2901	2843	3288	2884	4042					1974	1914	2426	2119	1527	1908	2370	1981	1625	1786						2412	3574	2948	2552	3001	3515	2858	2733
	3232	2775	2610	2498	2525	3811	2177	3566	2728	2696	2855	3296					2250	2046	1752	2033	1546	2009	2708	1652	1750	1909						2624	2823	3115	2676	2678	3874	2062	3101
	3142	2844	3436	3187	3851	3109	2236	2927	2440	2507	2680	2974					2645	1889	2027	2002	1775	1573	2587	1901	2336	2526						2819	2852	3064	3697	3282	4739	2045	2722
	4807	3530	3124	2867	3496	3059	3029	2775	2785	2397	2918	3535					2111	3080	1976	2444	1718	1494	2486	2040	2356	2417						2302	3616	4084	2593	2624	3943	1854	3052
	4054	2985	3081	2860	2856	3252	2248	2871	3245	2384	2970	2989					2130	2758	1881	2119	1990	1442	1699	2083	1655	1868						2501	2843	3343	2562	2707	3413	1957	2902
	2954	2768	2912	3354	2986	4441	3003	3838	2939	2983	2694	3001					2061	2166	1960	3019	1749	1489	1966	1813	1793	1848						2500	3131	3127	2812	3401	4573	2795	3481
	3185	2917	2774	2855	2302	3681	2408	3025	3366	2530	2529	2538					2617	1709	1970	2835	1889	1662	1818	1696	1748	1800						2570	3053	3274	3011	3140	4838	2429	3204
	3149	3547	3106	2911	2624	3222	2579	3336	3797	2921	3266	4014					1996	1964	2400	1885	1629	1894	1880	1949	1901	1853						3017	3579	3377	3696	2781	4155	2139	2767
	3721	3038	3395	3138	2965	3125	2361	2944	2776	3739	2737	3438					2395	3017	2378	2326	1627	1220	2649	1771	1846	1921						2339	2788	3201	2432	2842	4345	2113	3683
	3818	3137	3339	2973	3077	3450	2065	3012	2639	2604	2905	2990					2239	2300	2003	2040	1656	2280	1933	2329	1849	2267						2209	2953	3581	2729	2677	4601	2454	3167
	3218	2913	3723	2869	2581	2823	2162	3099	3111	2504	3260	2942					2212	2043	2107	2035	2197	2039	2791	2046	1805	2052						2819	3060	4076	3801	3609	3522	2136	2974
	3843	2952	2907	3106	2781	4715	2531	3856	2660	2564	2758	3114					2524	2048	2069	2836	1914	1519	1753	1665	1985	1755						2434	3710	3685	2506	3712	3859	2561	3286
18h																18h															18h

## Sheet: Fig 3G
Hypothalamic gene expression
	Agrp				Npy				Pomc				Cart				Prlh				Hdac3				Hdac5				Hdac8				Dnmt1				Dnmt3a				Dnmt3b
Ubi	LepRNull	Ubi-LepRNull		Ubi	LepRNull	Ubi-LepRNull		Ubi	LepRNull	Ubi-LepRNull		Ubi	LepRNull	Ubi-LepRNull		Ubi	LepRNull	Ubi-LepRNull		Ubi	LepRNull	Ubi-LepRNull		Ubi	LepRNull	Ubi-LepRNull		Ubi	LepRNull	Ubi-LepRNull		Ubi	LepRNull	Ubi-LepRNull		Ubi	LepRNull	Ubi-LepRNull		Ubi	LepRNull	Ubi-LepRNull
0.746701	2.06511	0.716999		0.843654	1.46121	0.674362		0.908267	0.334077	0.781284		0.996774	0.72489	0.638872		1.08134	0.708791	0.580618		1.18676	0.577414	0.79143		1.09565	0.936422	0.991132		1.01567	1.11788	1.09468		1.03847	1.09082	1.00589		0.955895	0.907602	0.797426		0.948922	0.851294	0.93016
1.06515	3.52898	0.89577		1.18333	1.60379	0.798133		0.968202	0.145055	0.65623		1.00555	0.683753	0.697192		0.965038	0.328758	0.54394		1.08683	0.639141	0.64609		1.05123	0.753687	0.848002		0.802408	1.4325	0.883059		0.947799	0.823758	0.960854		0.903936	0.647581	0.800319		0.745695	0.404334	0.519164
1.70651	2.41996	0.634844		1.1272	1.55586	0.763103		1.26513	0.346964	0.407031		1.09259	0.617541	0.650468		1.39545	0.782639	0.578159		0.945216	0.688621	0.814206		1.08495	0.825465	0.917897		1.06419	1.09599	0.978957		0.902763	1.00568	0.938539		0.839534	0.825024	0.753153		0.736722	0.862538	0.780391
0.741968	1.39661	0.834573		0.772334	1.06921	0.697366		0.871415	0.356489	0.387591		0.916532	0.810036	0.944496		0.705848	0.523895	0.889963		0.959584	0.599945	0.708485		0.945948	0.858918	0.96329		0.80798	1.28971	1.1766		0.977842	0.907126	1.06981		0.927509	0.729092	0.849339		1.10946	0.523931	0.740981
0.962699	1.72558	0.723373		0.954423	1.04109	0.509068		1.26106		0.512335		1.05551	0.807606	0.549027		0.589807	0.316975	0.613306		0.843116	0.587334	0.743949		0.923304	0.79825	0.906916		0.907663	1.01675	1.03857		1.03016	1.03105	1.1852		1.12546	0.854108	0.987657		1.16141	0.681484	1.02048
0.657585	4.53626	1.26827		0.830596	2.31845	0.740741		0.760774		0.572805		0.763221	0.689867	1.04735		1.41497	1.03582	0.704718		0.909822	0.801008	0.843819		0.864225	0.772124	0.826598		1.04461	1.14082	1.11088		1.0064	1.10291	1.02355		1.02626	0.99366	0.617537		0.782612	0.841919	0.42636
1.10146	1.78763	1.07726		1.15974	1.13732	1.08047		1.10678		0.904727		1.18088	0.679808	0.768581		1.15451		0.560378		0.830653	0.993596	0.639908		1.01337	0.895328	0.943966		1.14007	1.14354	1.20418		1.37077	0.935515	1.17668		1.09937	0.7761	1.08942		1.20111	0.678708	0.804771
1.01792	2.8721			1.12872	1.77535	0.7604		0.858379		0.365278		0.988927	0.84592	0.69934		0.693037				1.23802		0.794633		1.02132	1.04779	0.924884		1.21742	1.23565	0.834089		0.725797	1.22149	1.08245		1.12203		0.81657		1.31406	0.982626	0.689949
