# Supplementary material for: Long-term consequences of the absence of leptin signaling in early life
Source: eLife. 2019 Jan 29;8:e40970. doi: 10.7554/eLife.40970 (PMC6384028; doi:10.7554/eLife.40970)
Supplement: Figure 4—source data 1. [file elife-40970-fig4-data1.xlsx]

## Sheet: Fig 4A
Glucose tolerance test on adult male mice
Time after injection (min)	Ubi																																Time after injection (min)	LepRNull															Time after injection (min)
0	122	117	125	134	118	129	120	99	127	119	91	93	118	110	115	134	108	108	104	161	152	154	158	176	155	127	138	143	150	101	138	127	0	187	141	93	80	220	114	156	165	108	111	111	137	101	134	173	0
20	285	206	363	193	268	267	322	330	281	230	239	355	197	272	337	212	280	233	236	348	330	313	289	321	297	256	436	398	361	278	437	337	20	444	421	500	398	397	455	493	566	534	463	458	421	421	404	563	20
40	152	172	244	144	163	227	244	157	227	172	158	213	165	221	202	138	166	186	215	180	242	199	192	251	207	198	281	270	212	161	304	193	40	571	480	601	428	526	459	479	188	566	433	522	387	438	445	509	40
60	137	171	129	166	144	144	198	147	205	145	135	183	139	173	167	112	169	151	184	164	159	163	177	183	153	179	210	179	195	147	213	158	60	459	322	553	278	477	298	395	363	562	314	402	319	269	380	483	60
90	132	123	145	133	113	124	138	118	157	133	126	110	112	123	151	103	126	139	153	142	140	153	167	141	124	141	195	182	166	141	178	134	90	333	194	464	178	387	209	325	271	356	272	326	222	196	247	410	90
120	120	113	138	109	122	135	147	113	148	124	106	95	111	118	186	95	111	110	150	149	137	123	141	131	125	133	157	149	139	133	168	176	120	264	156	305	171	231	156	260	300	265	325	286	164	193	227	318	120
[truncated: 10 more columns]

## Sheet: Fig 4B
Area under the curve of GTT
Ubi	LepRNull	Ubi-LepRNull
19145	47595	17730
18390	35640	15495
23035	55270	14400
17855	32175	16310
18620	47660	25760
20515	35480	14920
23815	44525	23335
19640	38435	15050
23485	51785	14050
18705	39915	16500
17595	44830
21590	34625
16920	33690
20745	38635
23425	52315
15655
19670
19055
21500
22765
23190
22290
22750
23970
21050
21050
29175
26960
24900
19690
29385
22480

## Sheet: Fig 4C
Insulin tolerance test on adult male mice
Time after injection (min)	Ubi																											Time after injection (min)	LepRNull												Time after injection (min)	Ubi-LepRNull
0	100	100	100	100	100	100	100	100	100	100	100	100	100	100	100	100	100	100	100	100	100	100	100	100	100	100	100	0	100	100	100	100	100	100	100	100	100	100	100	100	0	100	100	100	100	100	100	100	100
20	71.4286	76.0331	79.8387	84.6847	97.1429	82.6446	66.9725	61.2121	77.5862	126.374	90.2439	85.2713	69.1667	51.938	79.6116	74.6479	70.4918	49.1228	75.1724	82.2368	58.156	39.6739	63.5359	48.5507	74.4	69.8529	68.6047	20	93.985	112.097	67.9104	135.417	115.385	182.927	120.645	119.298	72.6708	158.955	93.6306	84.5588	20	75	108.511	105.682	75.4386	67.8571	73.5537	137.607	123.958
40	37.1429	33.0579	41.129	47.7478	61.9048	71.9008	62.3853	53.3333	47.4138	81.3187	65.8537	74.4186	37.5	27.907	33.0097	49.2958	68.0328	44.7368	66.2069	70.3947	48.227	39.6739	40.884	48.5507	44	50	63.3721	40	70.6767	116.129	58.9552	217.361	138.462	199.187	92.2581	104.386	68.9441	163.433	73.2484	88.2353	40	63.5417	82.9787	102.273	63.1579	62.8571	71.9008	123.932	67.7083
60	35.2381	23.1405	23.3871	64.8649	25.7143	50.4132	67.8899	42.4242	32.7586	82.4176	78.0488	53.4884	23.3333	21.7054	28.1553	38.0282	92.623	26.3158	54.4828	60.5263	52.4823	28.2609	33.1492	41.3043	29.6	49.2647	69.7674	60	83.4587	95.9677	67.9104	225	179.231	221.951	92.9032	92.1053	75.7764	135.075	73.8854	94.8529	60	64.5833	90.7801	123.864	69.2982	60	81.8182	121.368	68.75
90	48.5714	33.8843	39.5161	62.1622	18.0952	50.4132	58.7156	44.2424	58.6207	83.5165	100.813	93.0233	26.6667	24.8062	30.0971	21.831	116.393	21.0526	45.5172	61.1842	41.844	35.3261	37.5691	41.3043	33.6	47.7941	72.093	90	79.6993	88.7097	53.7313	186.111	150.769	216.26	89.6774	93.8597	68.9441	105.97	67.5159	95.5882	90	80.2083	64.539	130.682	108.772	57.8571	91.7355	100.855	62.5
120	55.2381	49.5868	33.871	57.6577	18.0952	96.6942	66.9725	47.2727	71.5517	120.879	89.4309	65.8915	30.8333	37.2093	32.0388	35.9155	140.984	45.614	39.3103	55.2632	42.5532	34.2391	26.5193	43.4783	38.4	45.5882	75	120	78.9474	148.387	63.4328	172.222	116.154	282.114	107.097	97.3684	70.8075	117.164	76.4331	87.5	120	81.25	57.4468	110.227	71.9298	75.7143	79.3388	111.111	84.375

## Sheet: Fig 4D
Area under the curve for ITT
Ubi	LepRNull	Ubi-LepRNull
6338	9955	9010
5521	12851	9897
5698	7799	13830
8000	21847	9846
5638	16823	7986
8314	24911	9897
8050	11877	13957
6388	12053	9693
7151	8857
11533	15761
10439	9357
9310	11007
4979
4442
5340
5623
11693
4851
7145
8230
6333
4867
5442
5866
5692
6746
8672

## Sheet: Fig 4E
Serum insulin concentration (ng/ml)
Ubi	LepRNull	Ubi-LepRNull
0.657	72.64	1.596
0.479	30.16	1.188
0.583	49.36	1.528
1.255	118.2	1.696
0.975	134.4	2.08
0.612	12.76	1.364
0.833	28.36	4.148
0.594	84.26	1.528
0.904	4.28	1.368
0.719	70.28	1.692
0.855	134.4
2.118	27.02
1.361	47.86
0.594	13.98
1.009	26.08
1.029	88.24
1.041	35.2
0.643	21.68
1.193	83.9
0.649
1.225
0.657
0.788
0.913
1.531

## Sheet: Fig 4F
Glucose tolerance test on adult female mice
Time after injection (min)	Ubi												Time after injection (min)	LepRNull								Time after injection (min)	Ubi-LepRNull
0	84	98	108	109	100	99	95	83	91	115	96	90	0	68	117	114	193	174	88	147	119	0	68	86	100	99	84	91
20	230	239	200	229	208	265	164	261	118	236	270	193	20	284	406	430	438	191	298	482	415	20	223	193	157	162	151	102
40	145	158	155	167	131	192	124	181	104	139	157	150	40	336	423	467	427	151	240	432	341	40	114	160	147	131	114	122
60	123	124	119	139	124	156	105	125	100	137	128	137	60	347	318	469	345	137	180	348	261	60	111	155	104	137	124	120
90	112	109	110	122	103	123	84	96	117	103	99	95	90	337	195	256	224	130	142	167	166	90	86	109	83	115	87	76
120	114	101	103	101	92	105	83	96	122	82	107	101	120	214	114	143	187	175	150	122	110	120	78	104	89	117	104	65

## Sheet: Fig 4G
Area under the curve of GTT
Ubi	LepRNull	Ubi-LepRNull
16485	35075	13945
16805	33260	16625
16000	40630	13505
17660	37380	15480
15350	18530	13410
19295	22650	11645
13100	35290
17115	29465
13190
16395
17275
15550

## Sheet: Fig 4H
Insulin tolerance test on adult female mice
Time after injection (min)	Ubi												Time after injection (min)	LepRNull							Time after injection (min)	Ubi-LepRNull
0	100	100	100	100	100	100	100	100	100	100	100	100	0	100	100	100	100	100	100	100	0	100	100	100	100	100	100
20	54.1	71.6	59.8	78.9	95.2	85	159	82	83	88	78	78	20	87.5	92.2	155.2	95	131	120	89	20	125.9	83.7	70	79	94	77
40	49.2	67.6	56.7	51.6	65.5	60	151	62	68	57	80	54	40	112.5	69.6	142.5	54	78	100	57	40	108.6	60.6	66	75	67	63
60	50.8	67.6	63.8	50.8	78.6	37	137	44	33	34	42	38	60	100	77.4	132.2	51	94	96	50	60	125.9	63.5	54	59	61	54
90	50	54.9	69.3	65.6	75	22	108	36	36	26	39	32	90	83.3	85.2	102.3	35	101	116	40	90	109.9	94.2	51	55	56	51
120	116.4	103.9	57.5	60.9	82.1	30	104	32	50	32	35	39	120	105.6	78.3	141.4	48	116	108	46	120	92.6	85.6	53	68	63	52

## Sheet: Fig 4I
Area under the curve for ITT
Ubi	LepRNull	Ubi-LepRNull
7582	11583	13524
8680	9902	9584
7867	15449	7395
7762	7025	8225
9661	12300	8370
5935	12900	7460
6540	7060
6675	5005
6010
6905
6135

## Sheet: Fig 4J
Serum insulin concentration (ng/ml)
Ubi	LepRNull	Ubi-LepRNull
0.435	39.3	1.18
0.513	11.72	1.22
0.573	41.5	1.016
0.893	47.84	1.392
0.507	14.86	1.288
0.579	11.9	1.54
0.456	14.6	2.1
0.453	6.72	1.132
0.74	76.98
0.721	28.4
0.471	10.52
0.391	21.66
0.438
1.041
