# Supplementary material for: Long-term consequences of the absence of leptin signaling in early life
Source: eLife. 2019 Jan 29;8:e40970. doi: 10.7554/eLife.40970 (PMC6384028; doi:10.7554/eLife.40970)
Supplement: Figure 5—figure supplement 1—source data 1. [file elife-40970-fig5-figsupp1-data1.xlsx]

## Sheet: Fig S4A
Body weight (g) during and after tamoxifen treatment of young male mice
Age (weeks)	Ubi																Age (weeks)	LepRNull						Age (weeks)	Ubi-LepRNull
4	15	12.5	13.6	14	12.6	14	13.6	14.2	13.5	16.7	13.5	12.2	15.4	13.6	15.15	11.4	4	18	17	16.5	15	13.9	13.4	4	17	12.4	13.8	14.8	16.1	14.3	15	16.8	14.2	12
5	17.2	13.8	17.1	15.3	14.9	17.1	16.9	15.9	15	19.5	16.1	14.5	18.3	16.9	16	11.4	5	21.8	19.2	19.5	15.3	14.2	15.5	5	17.1	11.3	14.9	16	17.6	15.2	18.3	18.4	13.1	14.1
6	19	15.8	17.4	17.6	16.5	18.1	18.2	16.8	16.6	22	17.3	15.5	19.5	18.5	18.7	14.2	6	27.5	22.1	23.4	21.7	19.3	18.5	6	18.5	13.2	16.4	15.6	20.5	16.6	19	24.5	16.1	17.7
7	20.2	15.2	17.9	16	17.3	17.8	17.1	17.6	16.5	22.9	19.3	16	20.7	20.3	19.8	15.3	7	27.6	23.3	22.2	24.2	21.9	17.1	7	18.1	15	17.3	15.2	21	17.8	20.7	24.7	17.3	18.3
8	22.6	17.7	18.3	20.5	19.8	20.5	20.2	19.4	18.5	24.7	20.3	18.7	22	21.3	21	16.9	8	32.7	26.7	27	29	24.2	22	8	18.6	16.5	19.5	15.6	21.8	19.4	20.8	26.3	17.5	20
9	23.7	18	20.3	20.8	20.2	20.5	20.7	18.6	17.6	24.5	20.9	20.2	22	21.3	20.2	16.4	9	31.5	27.7	27	27.9	23.1	22.8	9	18	14.8	18.7	12.7	20.6	18.5	20	24	16.7	18
10	24.2	18.7	20.4	22.2	20.6	20.7	20.9	18.7	17.2	25.2	21	19.7	22.3	21.6	19.5	16.5	10	32.2	28	26.9	30	24.1	22.5	10	17.2	12.4	18	11	20	18	20.9	24.1	15.7	18.2
11	24.5	20.7	21.5	22	20.7	21.9	21.7	19.8	17.9	25.9	22.9	21.5	23.2	22.4	21.7	17.2	11	37.2	32.8	30.6	33.9	26.7	29.6	11	19.2	11.6	19.1	10.1	22.1	19.2	22.3	26.2	17.4	19.4
12	25.8	22.3	22.8	23.5	21.5	22.5	22.4	20.5	18.6	26.2	23.3	22.4	24	23	23.9	18.2	12	39.7	35.5	33.6	36.3	28.9	33.2	12	20.6	14.6	19.3	11.1	23.6	20.2	23.4	29.2	19.7	20.7
13	26.6	25.2	24	24.5	23	22.8	23.3	21.8	19	27.4	24.2	24.3	25.3	25	25.4	20.6	13	42.3	37	34.2	36.6	30.6	35	13	21.6	17.3	20.6	13.9	25.3	20.5	24.3	30.7	21.8	22.5
14	27.4	26.7	24.9	24.9	23.8	23	24.1	25	22	28.3	25.9	25.5	27.3	26.9	26.7	22.1	14	45	37.7	36.4	39.2	32	38.9	14	23.1	20.2	22.3	15.1	27	22.8	25.8	34.1	24	25.1
15	27.9	27.6	25.6	25.9	24.3	24.8	25.3	27.4	23.4	30	25.7	27.1	27.8	26.5	26.8	22.5	15	46.6	39.4	39.9	41.2	35.4	42.1	15	23.9	21.7	24.7	16.3	31.4	24.5	27.7	34	24.5	25

## Sheet: Fig S4B
Body weight (g) during and after tamoxifen treatment of young female mice
Age (weeks)	Ubi																								Age (weeks)	LepRNull									Age (weeks)	Ubi-LepRNull
4	13.4	13	13.1	12.7	13.3	11.5	11.3	9.3	12.5	11.1	12.3	11.9	11.4	13.4	12.1	11.5	12.8	11.1	11.8	12	12.3	13.2	10.8	10.1	4	15	14.6	13.4	15.1	11.9	13.5	13	13.4	13.5	4	16.8	15.2	17.2	14.9	16	13.7	15.4	12.6	15.2	17.5	13.3	14.2
5	15.8	13.8	14.3	14.9	15	13.1	13.2	11.7	15	12.5	14.2	12.5	13.8	15.2	13.8	13	13.2	12.3	13.7	13	15.5	14.4	14	12.5	5	20.7	15.9	14.7	18.6	13.4	15.4	15.2	15.1	15.5	5	17.6	15.3	17.5	15.6	16.7	12.9	16	14	16.7	17.8	18	15.9
6	16	15	16.1	16.2	16.5	14.5	14.7	13.2	16.3	13.9	15.3	14.3	15.3	14.9	15.4	14.7	14.2	13.4	14.6	13.4	16.2	15	14.8	14.6	6	25.1	19.2	16.8	21	16.5	18	18.2	17.4	17.5	6	20.6	17.4	20	19	18.7	16	18.3	16.5	18	18.2	18	17.7
7	16.4	17.3	17.4	16.7	16.4	15	16.6	14.4	17.1	14.8	15.9	15.7	16.3	15	16.3	15.3	16.5	14.7	15.5	15.1	16.4	16	15.2	15.1	7	26.7	23.1	18.2	21.1	20.2	21.2	20.9	19.8	19.1	7	21.6	18.2	20.9	18.8	19.5	19.1	18.7	17.6	18.1	18.9	19	18.4
8	17.2	17.9	17.9	17.6	17.4	15.4	16.7	15.8	17	15.3	16.2	15.6	17.8	16.1	17.2	16	17.1	15.2	15.8	15.3	17.4	17.3	16.9	16.2	8	31.8	26.4	20.6	24.6	24.6	23.5	23.8	21.2	21.3	8	22.7	18.4	21.5	18.5	20.1	21.3	17.4	17.2	20	18.9	20.4	18.5
9	17.9	17.7	18.3	17.8	17.4	16.6	18.1	17.4	17.4	16.2	16.5	16.4	18.3	15.5	17	16.6	18.5	15.3	16.8	16	16.3	17.3	17.4	14.9	9	32.6	25.5	21.4	24	24	23.6	23.3	20.5	21.8	9	20.1	16.7	19.5	16.8	19.2	20.7	17.1	15.2	17.3	17.2	18.9	17.1
10	17.8	18.2	19.2	18.4	18.2	17.2	19.1	18	18.3	16.8	17.7	17.2	18.6	16.2	17.4	16.3	18.4	14.9	17	15.7	16.1	17.9	18.2	16	10	32.3	25.2	22.8	24.8	24.4	23	23.3	20.9	22.5	10	19.8	16.9	20.7	17.1	20.5	22.2	15.5	13.5	18.5	15.8	18.4	16.4
11	18.6	19	19	18.4	18.2	17.3	19	17.2	18.5	16.8	17.8	17.6	19.5	16.8	17.9	17.8	19.1	16.1	17.7	17.3	17.8	18.3	18.7	16.6	11	37.2	29.7	26.1	26.9	26.5	25.7	26.7	26.2	27	11	22.3	19.3	22.3	18.7	23	22.8	17.9	15.8	20.5	17.5	20.6	18.3
12	19.1	19	19	18.1	18.2	17.2	19.4	17.9	19.1	17.2	18.4	18.2	19.2	17.8	18.3	18	19.5	16.4	18.6	17.6	17.8	19.1	18.5	16.8	12	40.1	31.8	27.2	29.2	29.1	28.7	30.1	30.1	28.6	12	23	19.7	22.3	19.1	23	23.6	19.6	17.6	22.4	18.7	21.3	19.4
13	18.6	19.5	20.4	18	19	17.4	19.9	18.4	20.1	18.5	18.5	19.4	20.5	18.8	19.3	18.6	21.1	17.4	19.8	19.2	18.8	19	18.6	16.8	13	42.1	33.4	28.5	32	31.4	30.9	31.7	34.2	30.7	13	23.2	20.2	23	19.1	23.3	24.3	20	18.2	23	19.4	21.8	20.1
14	19.9	20.2	20.9	18.5	19.9	18.2	18.8	17.6	20.9	19.1	18.9	20.2	21.9	19.9	19.5	19.4	21.6	18	19.7	19.5	19.9	20.8	18.6	16.7	14	44.3	33	30.9	34.1	34.3	32.7	33.9	38	32.1	14	23.9	21.3	23.9	19.8	24	22.3	20.6	19	24.5	19	22.7	21.5
15	20.8	20.6	21.3	18.6	19.6	18.4	18.7	17.6	20.8	19	19.3	20.1	21.6	19.8	20.7	19.7	21.2	18.7	19.9	20	19.8	20.6	18.7	16.8	15	46.4	33.2	32.5	37	36.6	33.5	35.7	40.7	33.4	15	24.8	21.2	24.4	20.2	24.9	23.1	21.3	19.4	25.4	19.6	22	21.7
