# Supplementary material for: Long-term consequences of the absence of leptin signaling in early life
Source: eLife. 2019 Jan 29;8:e40970. doi: 10.7554/eLife.40970 (PMC6384028; doi:10.7554/eLife.40970)
Supplement: Figure 5—figure supplement 2—source data 1. [file elife-40970-fig5-figsupp2-data1.xlsx]

## Sheet: Fig S5A
Glucose tolerance test in young male mice
Time after injection (min)	Ubi																Time after injection (min)	LepRNull								Time after injection (min)	Ubi-LepRNull
0	92	110	127	123	105	90	126	101	108	123	77	100	91	115	94	116	0	68	80	100	60	88	94	98	73	0	113	108	110	126	107	119	138	93	115
20	195	263	332	317	271	274	325	325	270	292	383	147	374	266	187	324	20	124	409	159	243	199	383	429	208	20	249	183	133	186	298	262	377	223	277
40	156	212	203	273	167	187	263	209	174	176	278	124	209	193	132	157	40	163	601	185	237	205	331	270	286	40	191	153	115	173	306	206	213	174	295
60	154	149	157	184	152	181	160	193	147	146	229	130	168	178	135	126	60	147	601	117	262	230	309	265	405	60	164	128	119	134	305	198	319	150	226
90	148	125	154	150	128	138	148	135	167	157	152	115	124	147	94	112	90	120	601	111	291	201	253	239	353	90	157	123	119	198	228	168	284	145	182
120	106	121	187	150	146	182	120	136	116	132	119	125	119	115	116	103	120	119	537	119	258	142	230	194	436	120	127	114	125	132	160	148	249	109	154

## Sheet: Fig S5B
Area under the curve of GTT
Young male mice
Ubi	LepRNull	Ubi-LepRNull
17820	15480	20645
19890	62110	16400
23320	15920	14480
24380	29350	19710
19640	22870	30015
21515	33985	22760
23260	31665	33410
22605	37865	18605
20385		26010
20930
26060
14995
22275
20915
15255
18835

## Sheet: Fig S5C
Insulin tolerance test in young male mice
Time after injection (min)	Ubi														Time after injection (min)	LepRNull								Time after injection (min)	Ubi-LepRNull
0	100	100	100	100	100	100	100	100	100	100	100	100	100	100	0	100	100	100	100	100	100	100	100	0	100	100	100	100	100	100	100	100	100
20	60.4938	70.5882	93.7985	94.6309	97.2973	73.913	51.2987	50	85.0467	66.9725	55.0633	66.3551	77.3585	66.0714	20	168.254	143.284	115.454	122	107.586	211.94	139.316	141.304	20	59.6154	54.9618	52.9851	68.2927	87.6033	87.156	66.6667	69.3694	82.2917
40	70.3704	57.9832	64.3411	95.302	104.504	69.5652	35.0649	46.6667	72.8972	79.8165	40.5063	67.2897	72.6415	49.1071	40	103.175	135.821	137.273	122	92.4138	141.791	108.547	160.87	40	55.7692	64.1221	46.2687	43.2927	66.9421	71.5596	69.1057	68.4685	67.7083
60	70.3704	52.1008	46.5116	110.738	97.2973	60.8696	39.6104	45.8333	46.729	68.8073	32.2785	65.4206	62.2642	45.5357	60	123.809	107.463	169.091	136	82.7586	172.388	114.53	148.913	60	64.4231	54.9618	43.2836	34.7561	66.1157	66.055	77.2358	52.2522	89.5833
90	53.0864	70.5882	44.1861	101.342	74.7748	71.3043	34.4156	41.6667	33.6449	66.9725	26.5823	61.6822	58.4906	44.6429	90	100	120.895	142.727	95	68.2759	164.179	177.778	129.348	90	74.0385	72.5191	44.0299	53.6585	78.5124	60.5505	88.6179	48.6487	58.3333
120	65.4321	78.9916	63.5659	87.9195	92.7928	66.9565	25.3247	44.1667	37.3832	70.6422	27.2152	63.5514	64.1509	42.8571	120	83.3333	104.478	139.091	86	65.5172	126.119	152.992	116.304	120	82.6923	103.817	44.7761	55.4878	93.3884	70.6422	91.8699	53.1531	170.833

## Sheet: Fig S5D
Area under the curve of ITT
Young male mice
Ubi	LepRNull	Ubi-LepRNull
7951	13774	8380
8176	14463	8489
7605	16650	6060
11926	13420	6543
11104	10100	9500
8535	19201	8702
5130	16449	9683
5992	16391	7320
6897		10552
8725
4924
8112
8274
6424

## Sheet: Fig S5E
Glucose tolerance test in young female mice
Time after injection (min)	Ubi																								Time after injection (min)	LepRNull										Time after injection (min)	Ubi-LepRNull
0	96	72	87	80	107	93	124	81	100	65	84	103	59	96	98	90	82	92	103	119	83	75	86	112	0	77	108	106	125	108	109	91	128	107	171	0	113	96	103	73	83	90	117	68	89	104	91	80
20	248	228	253	145	247	273	217	200	275	248	227	282	247	162	214	204	217	232	195	243	304	279	240	223	20	359	462	454	375	476	528	386	375	307	244	20	305	253	193	266	240	181	250	220	278	131	179	195
40	140	182	176	117	162	222	185	121	143	161	169	207	141	140	165	157	147	138	157	169	191	141	167	113	40	423	352	471	418	517	500	427	275	377	176	40	212	177	145	208	132	139	190	181	237	114	148	166
60	122	124	140	106	142	164	130	105	132	135	123	147	140	110	158	132	107	109	121	114	146	93	118	113	60	324	323	518	405	388	485	402	201	181	168	60	214	139	125	149	132	120	178	149	165	107	113	121
90	102	102	106	90	99	114	116	91	104	109	91	126	98	88	103	106	85	93	111	94	123	84	103	98	90	188	268	416	473	282	354	276	179	158	163	90	160	125	109	109	110	104	159	111	130	95	105	98
120	89	99	90	84	88	131	108	87	99	119	96	145	104	97	121	101	93	87	99	89	108	87	137	95	120	136	242	277	390	233	306	268	202	175	211	120	125	97	105	96	114	105	154	126	142	101	93	105

## Sheet: Fig S5F
Area under the curve of GTT
Young female mice
Ubi	LepRNull	Ubi-LepRNull
16165	32190	23495
16565	37105	18240
17480	49145	15760
12650	47275	18645
17090	42595	16580
20315	48985	14995
17630	39520	21500
13890	27705	17645
17265	26640	21345
17260	22365	12980
16005		14820
20440		15560
16350
13845
17415
16115
14720
15140
15910
16435
19690
15300
17095
15030

## Sheet: Fig S5G
Insulin tolerance test in young female mice
Time after injection (min)	Ubi												Time after injection (min)	LepRNull				Time after injection (min)	Ubi-LepRNull
0	100	100	100	100	100	100	100	100	100	100	100	100	0	100	100	100	100	0	100	100	100	100	100	100
20	65	82	102	72	71	74	74	79	83	113	66	80	20	145	181	194	108	20	80	98	58	72	77	108
40	47	62	54	56	42	70	41	51	42	52	43	43	40	144	143	155	83	40	64	68	45	55	50	82
60	29	44	38	52	40	47	20	26	30	33	20	26	60	145	150	176	97	60	47	56	35	63	39	40
90	50	43	44	55	44	53	20	29	26	35	20	19	90	117	110	170	105	90	35	51	35	72	54	32
120	59	59	52	59	53	54	20	78	46	44	39	41	120	131	125	202	148	120	50	67	48	62	73	44

## Sheet: Fig S5H
Area under the curve of ITT
Young female mice
Ubi	LepRNull	Ubi-LepRNull
6350	15880	6855
7155	16405	8255
7170	20510	5705
7395	12615	8205
6375		7230
7455		7420
4700
6290
5720
6835
4865
5295
