# Supplementary material for: Long-term consequences of the absence of leptin signaling in early life
Source: eLife. 2019 Jan 29;8:e40970. doi: 10.7554/eLife.40970 (PMC6384028; doi:10.7554/eLife.40970)
Supplement: Figure 5—source data 1. [file elife-40970-fig5-data1.xlsx]

## Sheet: Fig 5A
Body weight (g)
Young males					Young females
Ubi	LepRNull	Ubi-LepRNull			Ubi	LepRNull	Ubi-LepRNull
27.67	46.57	24.33			22.28	65.82	28.74
27.4	40.43	22.37			23.34	51.36	25.6
25.77	41.97	26.1			23.12	54.62	26.44
25.6	41.17	17.5			22.24	48.26	22.94
25.03	41.57	35.17			22.3	50.6	30.04
25.9	46.17	25.97			19.88	48.9	29.74
26.67	53.83	27.67			22.18	51.2	26.1
25.6		23.37			20.62	46.8	21.44
28.93		31.83			21.98	50.9	29.54
31.83		22.37			20.38	42.74	21.9
25.9					21		23.72
26.3					22		21.02
27.9					23.16
26.77					22
25.83					23.26
20.87					20.62
					22.82
					19.5
					20.82
					20.16
					19.98
					20.84
					17.58
					16.28

## Sheet: Fig 5B
Adiposity
Young male mice
	Subcutaneous depot			Perigonadal depot					Retroperitoneal depot
Ubi	LepRNull	Ubi-LepRNull		Ubi	LepRNull	Ubi-LepRNull			Ubi	LepRNull	Ubi-LepRNull
0.438322	2.22802	0.410498		1.19885	1.12028	1.38737			0.317599	0.469174	0.204626
0.428974	2.13714	0.384549		0.718709	1.41019	0.582639			0.24255	0.726301	0.295139
0.429322	2.62988	0.257667		1.24458	1.5023	0.758167			0.3	0.916396	0.1315
0.580872	1.54492	0.235256		1.22097	1.96964	0.815598			0.473826	0.134291	0.089957
0.390592	2.37403	0.859143		0.800523	1.52963	2.17357			0.206098	0.102687	0.382857
0.363322	1.94759	0.729316		0.62301	2.55483	1.23795			0.128547	0.477413	0.307818
0.429771	2.49093	0.504909		0.67042	1.59404	0.728			0.129008	0.470425	0.288545
0.557239	2.7216	0.913588		1.27822	1.26594	2.23628			0.378827	0.483144	0.481003
0.399635		0.297417		0.724453		0.780443			0.163139		0.132841
0.192354		0.54428		0.842518		1.13026			0.185219		0.259963
0.412222				0.555556					0.161667
0.516914				1.24065					0.347774
0.403691				0.72953					0.170973
0.527258				1.00067					0.331104
0.360387				0.64419					0.139613
Young female mice
	Subcutaneous depot			Perigonadal depot					Periovarian depot				Retroperitoneal depot
Ubi	LepRNull	Ubi-LepRNull		Ubi	LepRNull	Ubi-LepRNull			Ubi	LepRNull	Ubi-LepRNull		Ubi	LepRNull	Ubi-LepRNull
0.66009	2.13526	0.528155		0.941704	3.20805	0.701214			0.130942	0.880943	0.091262		0.163229	0.479862	0.119175
0.803571	1.8626	1.36838		0.858036	4.4562	2.44192			0.154018	0.8693	0.393986		0.148661	0.4678	0.391409
0.405617	1.95912	1.02476		0.838767	4.63566	2.54473			0.143612	0.732172	0.49377		0.130837	0.551332	0.356709
0.530734	2.50954	0.625664		0.462156	5.07736	0.788053			0.104817	0.778035	0.158628		0.080046	0.415511	0.172566
0.461522	2.31602	1.04027		0.501957	3.42914	1.1286			0.075	0.93914	0.14572		0.087609	0.565699	0.218093
0.382828		0.413291		0.332576		0.588397			0.026515		0.075738		0.057323		0.077637
0.451395				0.468605					0.073488				0.10093
0.487143				0.457381					0.073333				0.064286
0.369139				0.25933					0.033493				0.044258
0.472706				0.61422					0.079358				0.088991
0.606872				0.533886					0.048578				0.083649
0.633495				0.382767					0.064078				0.086408

## Sheet: Fig 5C
Serum leptin concentration (ng/ml) in young male mice
Ubi	LepRNull	Ubi-LepRNull
4.475	179.78	5.546
4.109	226.86	5.188
3.588	245.86	2.822
5.334	156.92	4.612
7.264	114.04	15.848
4.947	190.88	14.154
1.767	188.52	22.064
2.64	182.12	2.072
2.606		5.158
2.209
2.039
3.656

## Sheet: Fig 5D
Daily food intake
Young male mice				Young female mice
Ubi	LepRNull	Ubi-LepRNull		Ubi	LepRNull	Ubi-LepRNull
3.75	5.05	4.225		2.68	3.95	2.72
4.8	5.625	3.775		3.32	4.28	2.6
2.85	4.725	3.975		3.28	5.25	2.7
3.6	5.375	3.55		2.45	3.93	2.52
3.575	4.875	3.9		2.57	4.725	3.32
3.95	4.675	4.1		2.5	4.725	3.15
4.575	5.55	3.9		2.4	4.6625	3.05
3.8	4.9	4		2.52	5.15	2.8375
3.275		3.325		2.32	4.1875	3.4625
4.05				2.07		3.125
3.75				2.37		3.8125
3.4				2.55		2.5875
4.3				3.2125
3.85				2.5125
4.725				3.45
3.575				3.1625
				4
				2.725
				3.5125
				2.85
				3.475
				3.0375
				3.725
				4.7125

## Sheet: Fig 5E
VO2 consumption of young male mice
Dark phase				Light phase				24h
Ubi	LepRNull	Ubi-LepRNull		Ubi	LepRNull	Ubi-LepRNull		Ubi	LepRNull	Ubi-LepRNull
3017.09	1598.57	3025.76		2305.19	1390.22	2604.25		2675.28	1496.36	2807.55
3199.15	1692.51	2708.97		2580.78	1352.83	2335.93		2903.75	1517.51	2533.49
2642.32	1947.41	3015.69		2257.15	1638.04	2579.28		2423.96	1795.35	2830.55
3076.27	1746.8	2853.69		2444.49	1439.99	2219.55		2767.31	1571.08	2524.22
3589.58	2153.29	2713.95		2778.51	1821.84	2172.78		3158.26	1973.65	2418.51
3361.22	1897.57	3152.29		2784.44	1554.49	2676.77		3041.77	1714.58	2949.21
3160.34	1689	3138.6		2512.95	1335.85	2327.21		2822.38	1497.03	2709.46
3356.3	1898.43	2783.02		2682.7	1562.65	2193.57		3011.43	1696.23	2482.04
2884.44		3126.43		2405.87		2506.15		2665.4		2788.96
2872.75				2405.2				2636.5
3403.19				2534.28				2949.58
3265.19				2476.37				2874.42
2917.01				2326.96				2603.88
3357.62				2767.65				3069.4
3124.46				2483.6				2827.06
3640.08				2826.82				3248.38

## Sheet: Fig 5F
VO2 consumption of young male mice
Time of day	Ubi														Time of day	LepRNull								Time of day	Ubi-LepRNull
18h	1970	1751	2794	1837	2806	2157	3082	3460	2285	2182	2587	3424	2580	2115	18h	1310	1423	2244	1128	1496	1727	1075	1749	18h	2011	3243	2157	1750	2111	2894	3134	2048	2116
	2726	1765	1905	1885	2110	3013	1948	2130	2602	2181	2529	2606	1714	2016		1247	1697	1570	1185	1728	1835	978	1489		1873	2767	2077	1659	2094	2045	1968	1962	2079
	2835	1716	1795	2694	2239	2678	1852	1926	3370	2993	2218	2085	1967	2015		1735	1264	1419	1484	1522	1585	1170	1536		1920	1773	1924	1759	2602	1892	1738	3263	2936
	2313	2583	2267	3157	2119	2690	1968	3566	2851	2283	2526	2238	2046	1948		1581	1239	1752	1504	1530	1720	1380	1529		2904	1937	2899	1737	2502	1790	1873	2245	1830
	1846	2384	2070	3116	3268	3621	3713	2199	1808	2126	2703	3005	2248	2185		1365	1682	1710	1864	1794	1596	1740	2126		1933	2826	2847	3242	2124	2069	1813	1975	1947
	1889	2207	1921	1883	2388	2923	3226	3120	3094	2301	3251	2678	2038	3214		1290	1250	2042	1524	1566	2021	719	1554		2908	1976	1962	2025	3167	2246	2059	2182	2144
20h	1961	2030	2865	2287	3787	2617	2409	2359	2240	3130	3519	2604	2111	3228	20h	1468	2018	1528	1724	2585	2259	1342	1950	20h	3198	1934	2391	3580	3189	1855	2995	1903	2876
	2737	2219	3120	3191	3597	4375	2154	4071	2201	2775	3204	3988	2389	3339		1800	1896	1605	2104	2662	2326	1725	2125		2137	1895	2278	3262	2275	2833	2558	3310	2089
	2109	3186	3169	2960	4193	3698	2495	3108	3489	3494	2960	3420	2313	2362		1641	1631	1683	1949	2134	2550	1545	2228		3263	2602	3429	3665	2533	2360	3067	3205	1989
	2420	2591	2286	3030	3872	4278	3005	3860	3131	3754	3781	3583	3201	1896		1380	1430	1779	1913	2406	1920	1985	1599		3275	3347	3211	3314	3219	3524	3464	2406	3310
	3136	3791	2573	2212	4115	4351	3590	3419	3369	3784	3614	2971	2400	3450		1602	1551	1842	2211	2383	1924	1977	1994		3315	3195	3440	3505	3039	3603	3649	2049	3522
	3692	3612	3422	2121	4125	4439	3943	3472	2548	3222	3273	2906	3201	2829		1938	1594	2186	1875	2462	2258	1519	1192		3504	2521	3263	3649	2373	3480	2884	2024	2464
	3640	3342	3508	2313	3717	4392	3211	3825	2339	3187	2967	3369	2657	2165		1480	1630	2497	1684	2200	2495	2103	2195		3189	2349	2302	3757	3438	3480	3448	3281	2477
	2794	2746	3237	3430	3743	4283	3592	3558	2535	2136	3745	2995	2878	2256		1484	1500	1850	1914	2407	2137	1688	2732		2653	2409	2094	3688	3327	2612	3617	3009	3345
	2699	2698	3047	3572	2743	4181	3725	3882	2521	2047	3366	3917	2161	4263		2095	1749	1658	2002	2168	2077	1953	2436		2384	2685	2466	3635	3355	3387	3312	2296	2091
	2207	2158	2300	2821	2501	4037	3083	3925	2505	2327	3973	2957	3060	3935		1578	1913	2169	1956	2204	1990	2260	2769		2143	2736	1909	3895	2535	2780	3772	2110	3661
	2405	3361	2270	2161	2922	4265	2526	4201	2690	3807	3880	3725	2991	3758		1808	1590	2216	1994	2724	2049	1800	2267		3405	3598	3093	3765	2651	2292	3343	3548	3997
	2981	2402	1993	3007	3907	4300	2239	3960	2268	3241	2761	3407	2626	4238		2122	1498	1978	1868	2772	2079	1592	2185		3692	3387	3132	3723	3542	2477	3521	3534	3966
	3455	2247	2425	3854	3759	3512	2241	3709	2660	3831	3022	3516	2735	3898		1801	1715	1735	1769	2232	1901	1660	2504		2857	3131	3190	3661	2746	3598	2932	2609	3664
	3356	3386	2216	3530	3179	3055	3490	4223	3519	2416	3689	4239	2996	3726		1429	1894	2036	1650	2089	1832	2117	2429		3217	3217	3468	3782	2434	3822	3829	2374	2457
	3852	4018	2204	3421	3466	3485	3688	3936	3751	2355	3941	3539	2637	4077		1750	2182	2205	1771	2042	1813	1427	1915		3600	2412	3382	3559	3339	3182	3876	2857	3238
	2573	3988	3396	3539	4019	3723	3486	3825	3123	2770	3406	3533	2861	4171		1355	1664	1596	1845	2639	1694	1793	1874		4112	3058	3474	3535	2485	3829	3487	2905	3827
	2857	4049	3438	3123	3930	2997	4101	4073	2015	2449	3709	3186	3343	4031		1225	1612	1535	1994	1927	1817	2010	1673		3557	2134	3116	3216	3676	3902	3322	3507	4001
	2359	3660	3503	3589	3987	3989	3558	4167	3319	4078	4216	2339	2405	3901		1579	1832	1607	2160	1799	1941	2102	1717		4119	3151	3325	3405	3410	3625	3547	3575	3822
	2433	3865	3497	2603	4313	2970	3212	4175	3502	3566	4555	2552	3630	4030		2012	1938	2322	1785	1903	1775	1616	1574		4243	3636	2686	3038	3121	2820	3818	3629	4066
	2172	3524	3495	2241	4412	4421	3585	3243	2213	3825	4188	2983	3299	3803		2153	1760	1858	1694	1889	1763	1897	2053		3931	3624	2390	1873	2433	3323	3573	2385	3769
	3289	3614	3310	2148	3862	4112	3364	3532	2060	3331	4059	3594	3051	3939		1462	1592	2044	1631	1819	2403	2260	1963		3335	3361	2365	1673	2362	2442	3938	3040	3970
	2747	2709	3075	1968	4194	4414	3754	2816	3108	2700	3666	3823	3159	3451		1384	1511	1600	1694	1905	1872	1626	2409		2722	2068	2821	3101	2390	2095	2868	3335	3746
	2551	2243	3219	2159	3044	4133	3201	2434	2785	2175	3884	3621	2720	3457		1321	1437	1838	1956	1639	1360	1529	1888		2449	1749	2137	3098	2803	2021	3729	3513	3694
	3634	2040	2104	2977	3176	4384	2231	3142	2101	2088	3094	2513	2945	2350		1587	1590	2152	1662	1835	1781	1474	1776		2928	2101	2880	1849	2317	3673	2879	3139	3955
	3696	1916	2746	3308	4147	4206	2080	3308	1943	2593	2977	2996	2775	2454		1533	1501	2008	1606	2823	1641	1307	1439		2365	2154	3143	1590	2264	2910	2284	2189	3592
	3704	2274	3037	3399	3614	3800	2251	3562	2708	2090	3053	3218	2579	3104		1019	1283	1908	1572	1880	1525	1698	1888		2484	2034	3438	1707	2035	2765	2862	2162	2001
	3333	1974	2805	2571	3893	2476	2272	3061	2211	2216	3667	2097	2887	3745		1118	1310	2214	1977	1787	2006	1494	1952		2965	2068	2981	1857	2383	2207	2825	1959	2722
	2335	2475	2879	2303	4056	2319	3959	2359	3013	2804	4148	2899	3883	2412		1617	1637	1680	1371	2325	1676	1113	2550		2131	2878	2337	2663	2818	2027	3272	1936	2762
	2182	2330	1903	2492	3767	2296	3478	2240	3111	2276	3362	2255	3419	2136		1561	1988	1616	2162	1914	1827	1357	2153		1996	1850	2836	2255	2657	2073	2899	1957	2179
	2233	2873	2515	3163	3317	2182	2482	3370	2619	2557	3025	3263	3363	3797		1353	1643	1904	1692	1847	1797	1354	2151		2438	2853	2689	2000	3264	2179	2870	2096	2166
	2154	3944	1918	2677	3226	3274	2324	3179	2127	2308	2836	2427	3209	3703		995	1593	1729	1588	2122	1746	2048	1485		2369	1998	2837	1956	3300	3641	2960	2186	3222
	2374	3626	2927	2776	3000	2683	3859	2249	2131	3165	3118	3449	3010	2894		1640	1851	2474	1905	2196	2141	1638	2568		2734	1830	2405	1794	2925	2996	3403	3153	2354
	2146	2953	2924	3373	3665	2284	3021	2630	2789	3406	3588	3318	3267	2221		1529	1850	2496	1706	2460	2015	1821	2231		2957	2181	3246	3180	2751	3633	2689	3252	3416
	3265	3649	2015	2603	3724	3681	3034	3226	3031	2751	4074	3645	3090	2215		1211	1523	1783	2050	2162	1770	1316	2698		2626	2971	2415	2976	3493	2476	2499	2375	2337
	2820	3657	2126	3704	3741	4438	3243	2336	2946	2637	3836	3196	2951	2296		1746	1999	1635	1608	2578	2081	1758	2737		2593	1947	2691	3057	3061	2129	3446	3455	3281
	3536	2791	2848	3496	4221	4392	4083	3919	2747	2340	2860	3435	2898	3802		1775	2167	1546	1916	2603	2021	2102	2483		2935	3236	2435	1980	2592	3455	3069	2524	3725
	3899	3951	2729	3942	4035	3706	3573	4128	2467	2605	4238	4012	3793	3787		1835	1822	2505	2028	2795	1963	2394	2477		2743	2377	3362	2103	3207	3339	2581	3358	3985
	3973	3623	3179	3871	4056	2379	3895	3188	3585	3091	3932	3707	3685	4059		1225	1969	2246	1898	2620	1821	2189	2556		3894	2019	3586	3007	3465	3708	2765	3605	4196
	3821	3871	2083	3728	3964	2302	3708	2349	3297	3876	3087	2756	3537	4040		1523	1620	2405	1915	2382	2308	2155	1802		3496	2940	2938	2877	3013	2891	3705	3615	3848
	3761	3857	3236	3788	3820	2656	3772	3790	3280	3333	2452	3780	3462	4004		2217	2347	1599	1643	2154	2296	1279	1668		3701	3392	2658	2893	2303	2324	3738	3457	3648
8h	3442	3984	3440	3719	3052	2233	3749	3967	2242	2400	2847	3672	3137	3893	8h	1963	1355	1631	1631	1923	1886	1597	1679	8h	2703	2367	3030	2868	2277	3194	3499	3417	3739
	2142	3875	3405	3338	3048	4324	3354	3623	2875	2067	2637	3008	2910	3811		1454	1363	1616	1384	1909	1866	1869	2385		2896	1880	2695	3278	3236	4186	3471	3318	3580
	2166	3646	3031	2059	3364	4321	2465	2919	3111	2391	2259	2223	2803	3597		1327	1185	1749	1535	1743	1753	1070	2285		2323	3273	2493	2619	2504	4063	2203	2280	2723
	2193	2651	2834	2090	2926	2876	2004	3518	2427	2212	2205	2109	2399	2291		1504	1533	1516	1683	2222	2057	1199	1795		3150	3263	3616	1857	2520	4059	2111	2138	2081
	2242	2152	2082	2128	2398	3272	1939	1978	1909	2508	4040	2651	2327	2088		1361	1463	1460	1439	2443	1639	1065	1613		3570	2679	3047	1678	2265	3684	2617	2071	1852
	2182	2170	1877	2205	2731	2916	2071	1874	1917	3625	3692	2063	2968	2091		1287	1439	1817	1424	1762	1629	1801	2213		3466	3042	2426	1813	2097	3492	1980	3227	3208
	1918	2661	1841	2150	3947	2356	2138	1800	2848	3655	3760	2270	3121	2296		1186	1548	2069	1912	1625	1678	1221	1521		3377	3201	2069	1602	2159	2365	1860	3176	3322
	1908	2975	2844	3656	3555	2083	4696	2112	3040	3127	2529	3452	2625	4120		1146	1184	1641	1895	1489	1518	1635	1470		2118	2443	2741	3445	2094	3069	3172	2079	3138
	3084	3734	2620	3332	2718	3237	2896	2089	2061	2231	2428	3102	2071	3367		1114	1274	1527	914	2063	1417	900	2021		2010	1917	2605	3177	1904	2225	2003	2054	1984
	1902	2956	1920	2598	2449	2992	3547	4135	1956	2069	2242	2296	2337	2220		1681	1412	1399	1437	1770	1699	1018	1395		2025	1845	3298	2187	2771	2134	1785	1851	2025
	1804	2594	2316	2023	2808	2292	2462	3452	2300	2235	2638	2324	1877	2040		1243	1533	2060	1582	1568	1364	1141	1501		1856	2171	2800	1783	2064	2051	3149	1834	3434
	2300	2288	2438	2238	2937	2011	2030	3404	2261	2132	2382	2531	2107	2117		1135	1371	1967	1214	1554	1389	1477	1436		2833	1814	2575	2370	1970	3520	2075	2297	3221
	3102	2137	1772	2038	2147	3934	1977	1814	2794	2679	2429	2704	2140	2325		1103	1401	2320	1430	2177	1608	1783	1300		1935	1888	1831	3986	3221	2688	1877	1808	2238
	3323	1928	1821	1963	2454	3219	2639	2004	2452	2545	2473	2281	2212	3714		1212	1348	1579	1367	1641	1732	1262	1286		2823	1896	1953	2219	2215	2025	2852	1994	1994
	2247	1854	1882	1989	2121	2498	3561	3145	1936	2247	2398	2378	2674	3396		1737	1411	1498	1782	1478	1277	1169	1784		2246	2855	2051	2086	1976	1962	2790	3224	2023
	1754	2876	1927	2154	2476	2444	2983	3228	1817	2143	2044	2056	2279	3294		1240	1727	1404	1619	2019	1182	1132	1221		3615	2901	2324	1782	1743	2556	2126	2956	3147
	1707	3244	1759	1944	2546	2185	2991	3694	1978	2163	2148	2231	2118	2187		1041	1323	1629	1360	1343	1458	1088	1331		2971	3151	2150	1598	1835	2175	1746	2139	3100
	1851	2167	2794	1977	2288	2511	2945	3373	2711	2197	2212	2408	2598	2394		1677	1260	2035	1408	1353	1955	1141	1426		3104	3227	2211	1587	1817	1941	2474	1917	3065
	1958	2282	2869	2044	2397	2609	1919	3317	2452	2820	2515	2173	2328	2229		1815	1004	1460	1625	1394	2068	1482	2147		2507	3067	2173	2263	1872	1983	1850	1857	2010
	1883	1967	2780	3024	2417	2019	2274	2104	1731	3047	2134	2434	1964	3228		1179	1838	1407	1190	1405	1661	1720	2214		1954	1992	2213	2850	2094	3669	1916	1860	2208
	2199	1965	1927	2905	2173	3914	2151	2078	2143	2072	2379	2184	2146	2101		1153	2149	1254	1623	2145	1535	1517	2351		1858	1711	3234	2543	1815	3198	1969	2707	2593
	1865	2014	2106	2253	2538	3181	2056	2274	2680	2104	2343	3011	2697	2181		1283	1037	1199	1875	1968	1638	1171	1438		2174	1823	2933	1534	1831	2162	2134	2756	2083
	1913	3478	1880	2083	3579	2343	1996	1925	3155	2791	3039	3273	2112	2450		1137	1027	1739	1488	2379	1557	1200	1423		2057	1930	3202	1698	2758	1954	3081	2821	2179
	1810	2589	2304	1913	3254	2055	2746	3146	1861	1962	2049	3058	3197	3018		1608	1097	1876	1003	1524	1932	1287	1339		1841	1905	3271	1755	1848	2140	2220	2485	3046
	3064	2166	1905	2146	3275	2321	1896	2105	2045	2107	2393	2085	1943	2947		1558	1016	2044	1291	1444	1673	1146	2024		2196	1783	2117	1783	1971	2286	1966	1855	2074
	3083	2128	1896	2124	2395	2174	2148	2623	2136	2179	3683	2352	2214	2290		1329	779	1757	1343	1415	1452	1501	2051		1898	2783	2049	2567	2522	1869	1852	1990	2298
	2978	1887	2749	2722	2811	2019	2884	2510	2375	2446	2414	2258	2167	2226		1243	1325	1631	1261	1391	1255	1816	1430		1866	2671	2029	3009	1819	1938	2638	1935	2762
	2190	2788	1967	2358	2249	2216	3125	2176	2203	2069	2281	2973	2041	2437		1199	1447	1579	1545	1404	2099	1177	1428		2341	2044	2451	1990	1989	2888	1722	1938	2924
	1771	2001	1813	2327	2366	3719	1943	2372	2420	2141	2240	2698	1800	2321		1121	1224	1497	1687	1826	1599	1078	1494		3318	2273	2292	1729	1882	3668	2213	2070	2689
	1720	2015	1824	2001	2400	3185	1931	3103	2441	2445	2127	2045	2997	1990		1694	1040	1352	1930	1604	2254	1507	1351		2253	2518	1933	1633	2298	3026	1694	2030	1983
	2250	1974	2158	1999	2212	3009	2127	2051	2097	3224	3214	2749	2031	3931		1927	1476	1301	1354	1644	1642	1332	1498		2306	2247	2857	1770	1960	2280	3076	2035	2091
	1701	2710	2085	3169	2336	2407	2056	2404	2079	2114	2108	3416	1961	3820		1959	1659	1801	876	1594	1617	1222	2201		2020	2059	2244	1687	1857	2018	2522	3376	2012
	1869	2372	3170	3161	4307	3482	2121	2023	2298	2026	2174	2666	2348	3517		1556	1855	2158	1682	1336	1608	994	2121		4434	2177	3137	2837	1969	1930	2102	2719	2329
	1643	1993	2235	2564	3328	2868	2068	3357	2508	2139	2764	2078	1879	2015		1309	1341	2161	1702	1313	1762	1147	1267		3282	3256	2844	2214	3023	1836	1944	1707	2324
	2906	2082	1772	2003	3057	2579	3116	2169	2619	3044	2122	2170	1722	2159		1222	1253	1484	1250	2043	1414	1108	1393		2607	2053	2029	1791	1941	3357	1843	2113	2257
	2863	3578	1945	2322	2325	3041	2730	2368	2127	2284	2357	3457	2513	2432		1582	1761	1424	1153	1986	1774	1168	1630		2003	1729	2107	1932	1955	3304	2059	2017	2010
	2688	3133	2121	2139	2400	4177	2190	4380	2065	2115	4650	3283	1944	2242		1865	1832	1787	1430	1810	1752	1971	1346		1930	2082	2287	1832	3106	2466	2916	2020	3520
	2073	2620	2147	2318	2199	2863	1898	3636	1958	2112	3540	2338	2731	3391		2045	2169	1932	1137	1548	1453	1745	2322		3194	3024	2787	1738	2432	2107	2258	2112	2983
	1841	2219	2081	2320	3638	2536	2060	2611	3031	2520	2896	2103	2070	2312		1422	1474	1347	1924	2176	2000	2017	2051		3335	1972	2783	2672	2921	2079	1925	3091	1987
	2936	2032	3013	3400	2878	2842	2500	2468	2501	2251	2153	2834	3229	2246		1393	1254	2264	1641	2127	2108	1150	2061		3311	2110	2162	2406	3069	3536	2224	2210	2059
20h	2132	1869	2838	2454	2597	3564	3924	2206	2636	2326	3690	3135	2089	2932	20h	1954	1700	2494	1519	1949	1912	1127	1703	20h	2162	2112	2128	1789	3399	3231	2603	1982	2607
	2542	2625	1968	2545	3736	4479	2827	4114	3166	3685	2909	2567	1996	3311		1684	2112	1448	1585	2499	1867	2059	1709		2352	2162	3152	1959	3204	2368	2075	3409	2803
	2237	3102	2252	3718	3540	4223	3538	3337	3697	2545	3776	3918	2308	2512		1910	1279	1988	1913	1974	2126	1885	2605		3924	3392	3482	3797	2962	2879	3578	3540	2475
	3357	2761	3589	3894	3001	3847	3205	4139	3573	3328	3936	3660	3483	3782		1662	1572	1634	1673	2622	2414	2150	2493		3818	2869	3594	3645	2746	3150	3282	3467	3306
	3459	3706	3401	3533	3798	4422	3429	3186	2819	3748	3475	2654	2616	4035		1691	1789	1761	1880	2541	2095	2085	1999		3642	3812	3200	3790	2573	3765	2787	2394	3593
	2905	3764	3095	3766	3743	4440	3751	4148	2270	3217	2729	3651	2436	3241		1939	1581	2338	1843	2470	1943	1561	2125		3298	3055	3512	3814	3199	2638	3410	3179	3800
	3414	3917	2990	3703	2928	4412	2477	4117	2560	3569	2424	2861	2829	3189		1568	1555	2432	1708	1862	1861	1088	2460		2650	3372	3805	3004	2524	3164	2748	2440	3799
	3553	3713	3092	2350	2715	4179	2236	3831	2956	2382	4221	3212	2770	3373		1447	1502	2560	1831	1822	2105	2053	2358		3115	2889	3153	3583	2413	2760	2591	3101	3620
	3816	2960	2140	2106	3931	4179	2217	4194	2439	2855	3706	3575	2620	3725		1545	2199	2705	1602	2239	2283	2192	1799		2442	2652	2394	3531	3242	2645	2840	2535	3992
	2523	2665	2404	3087	4106	3843	3797	3792	2181	2421	2563	2848	3101	2810		1849	1626	1640	1847	2587	2040	2219	1277		3401	3287	2527	3768	2907	2398	3194	2411	2673
	3266	2246	2199	3524	3700	3950	3024	4320	2620	2397	2281	3670	3151	3763		1552	1899	1474	1822	2339	1530	1721	1460		3950	2383	2780	2919	3554	4104	3621	3465	2271
	3511	3394	2842	3459	3384	2874	3906	3759	3270	3861	3288	3757	2625	3775		1198	1759	1612	1663	2378	2036	1426	2790		3837	2449	2555	3273	2619	4171	3614	3685	3653
	2793	3604	3185	3699	3588	2471	3793	3534	3751	3445	3527	3075	3153	3685		1394	1416	2556	1958	2367	2071	2196	2110		3081	3139	3751	3533	2796	3846	3378	3298	2985
	2823	3842	2250	3660	3157	3690	3994	3977	3429	2693	4041	3054	3578	3473		1667	1395	2261	1828	2351	1530	2088	2164		2901	3806	3425	3701	2351	4073	3688	3281	3664
	3764	4006	2195	2313	3699	2563	3528	2954	2319	2430	3723	3621	3238	2761		1737	2140	1644	1795	2711	1806	2000	2509		2671	3212	2823	3394	3343	4155	3260	2951	3611
	3946	4218	2714	2850	3887	4341	3712	4212	2961	2874	3859	4134	2645	3838		1276	1944	1709	1798	2197	2239	2289	2334		3262	3154	3714	2976	2822	4003	3835	3585	2902
	3961	4012	2303	3285	4334	4331	2550	4396	2139	3661	3725	3978	2597	3710		1497	1981	1410	1850	1923	1798	1463	2433		4082	2512	3825	2103	3675	3340	3267	3490	3161
	3386	3995	2603	2522	3576	4044	2466	4125	2587	3798	3760	3836	2810	4069		1635	1690	2239	2151	1778	1831	2116	1096		3981	3299	3204	2523	3344	2867	3309	2823	4017
	2635	3286	2326	2597	3035	3956	2339	2919	3117	3582	4174	3111	3609	4160		2045	1360	2071	1541	2190	1732	1959	1269		3829	2697	2953	3126	2651	2670	3653	2280	3949
	3303	2476	2416	3511	3859	2986	3455	2675	3387	3478	3997	2544	3436	4218		1277	1328	2344	1527	1632	1617	2127	1330		3445	2395	2823	3566	2103	2335	3353	2790	3872
	3808	2209	3480	3829	4383	2539	3289	4020	3623	2919	3989	2578	2766	4099		2072	1139	2185	1461	1551	1682	1384	941		2616	2480	3575	3553	1983	3496	2555	3438	4094
	3802	2148	3418	3877	4089	2623	4244	3990	3500	3062	3669	2738	2845	4133		1487	1027	1721	1476	2225	1563	1180	1216		2568	2345	3723	3554	2719	3170	3419	3431	3843
	2581	1968	2383	2387	2916	3542	3717	3712	2299	2666	3054	3371	2781	2805		1343	1804	1643	1423	2430	1435	1231	1007		2272	3608	3529	3245	1915	2364	2509	2316	3706
	3179	2111	2028	2457	3515	2407	3275	2706	2143	2528	4242	2702	3332	3071		1258	1645	1979	1598	1628	1463	1659	1420		2670	3288	2257	2024	2659	2130	3373	1988	3290
	2312	2211	2285	2125	3651	2178	3776	2619	2869	2480	3985	2988	2714	2781		1182	1515	2504	1956	1532	1914	1464	1743		2116	2229	2612	1680	2671	3453	3158	1960	2371
	3347	2094	1956	2190	4137	2301	2675	3511	2465	2406	4043	2609	3593	3249		1481	1478	1600	1455	1748	2140	1001	1348		2968	2990	2741	1744	2608	3288	2802	2772	2118
	3618	3192	2818	3144	2816	2616	2363	3064	2810	2687	3902	3351	2651	3031		2105	1438	1487	1859	2143	1740	1217	1897		3676	2003	3538	1712	1874	3911	2333	2317	2295
	2791	3407	1889	2969	2971	4849	2112	2378	2372	2481	2452	3142	2739	3719		1148	1132	1393	1620	1794	2079	1566	1753		3695	2045	2710	1720	1861	3893	2028	2032	2107
	2332	3465	2156	2475	2667	4160	2194	2214	2227	2466	2198	3043	2650	3870		1815	1056	2218	1483	1778	1757	1938	2510		2361	1834	2610	2127	1852	2355	2681	2111	2260
	2143	2437	2843	2585	2447	3573	3074	2316	2977	2271	3039	3163	3570	3074		2242	961	2431	1453	2399	1874	1364	1556		2113	2075	2962	1732	2699	2129	2282	2594	3193
	2262	3363	1991	2912	2572	2814	3944	2953	2967	2952	2640	3420	2585	3276		1371	1171	2090	1337	2358	1568	1369	2522		2142	2701	2315	2915	2295	2218	3352	2146	2532
	3176	3706	1980	3101	3726	2714	3057	3898	2035	3150	2371	2859	2684	3435		1468	2147	1470	1537	2005	1758	1599	1206		2140	1911	3562	3056	2744	2106	2704	2913	3593
	2163	3913	2811	3506	3891	1965	3027	4027	2872	2230	2473	3766	3532	2971		1369	1786	1341	1976	2014	2054	2002	1289		2913	1972	3309	2985	3066	2662	2305	2944	2480
	2843	3966	2815	2622	3060	1953	2579	3818	2805	3029	2634	3042	3110	3035		1829	1591	1393	1998	2394	1884	1832	1820		2305	1859	2336	1881	1987	2263	2915	2492	3458
	2660	4130	3124	3759	4127	2197	2132	3603	2456	2291	2205	3796	3695	3586		2017	1739	2064	2123	2220	1645	1920	2085		3353	3082	3470	1761	3019	3863	3438	3345	3708
	3599	3769	2316	3934	4420	4739	2107	2388	2511	2363	3242	3621	3373	3273		1994	2353	2289	1490	2376	1580	2183	2475		3689	2039	3684	1726	3010	3726	3648	3653	2697
	2649	2851	2419	3764	4048	4050	3487	2098	3287	2860	2211	3661	2762	3985		1936	1774	2299	1178	2497	2503	2096	2660		3601	3255	2841	3449	2888	2870	3348	3781	3734
	3746	3713	3309	3815	4036	3677	2880	3585	3332	2417	4111	4076	3503	3716		2021	1579	1378	1959	2487	2019	1691	2561		3208	2134	3982	3042	2658	3213	2361	3458	3725
	3595	3678	3211	3955	3830	3478	3718	2442	2976	3366	4228	3631	3428	2965		2078	1880	1412	1987	2430	1977	1570	2232		3305	3144	3876	3086	2080	3507	3340	3492	3663
	2989	3829	2551	3840	4048	2359	4084	3929	2305	3763	3885	3698	3408	2941		2141	1769	1215	1536	2602	1439	1714	1806		2448	3462	3782	2779	1648	3262	3178	2779	3421
8h	2179	4153	3030	3424	3785	1764	3379	3988	2160	3959	3684	2437	2511	4079	8h	1860	1591	1156	1324	2378	1401	1931	969	8h	3524	3195	3789	2758	1445	4073	2954	2207	2228
	2037	3687	3139	2560	3005	1620	3522	3613	2602	3278	3533	3278	2323	3966		1138	1497	1181	1565	1671	1864	1426	952		3759	2379	3122	1569	2643	3223	2032	2964	1994
	2871	3385	2878	2183	2513	1608	2184	2482	3504	2189	3510	3216	2702	3625		1991	1437	1257	1180	2042	922	1350	1448		3083	2433	2653	1474	1584	3024	1962	3158	1921
	1873	2149	2323	1977	2423	1814	1978	2115	3316	1925	2047	2225	1993	2428		1260	1483	1010	1072	1546	807	1316	2244		2543	3265	2731	2599	1497	2317	3124	3125	2193
	2733	2043	1819	2238	3440	4714	2628	2095	3184	3148	2140	2332	2579	2225		1736	1628	963	1035	1485	797	1649	1574		2269	3329	2241	1626	1539	2353	2400	2034	2178
	3345	1951	1812	3289	2144	3372	1886	4026	1974	2262	2714	2233	3406	3792		1355	983	926	937	2587	1077	1727	1487		2094	3092	2431	1466	1658	3168	1904	1774	2226
	3124	2132	1854	3368	2300	2270	2013	3678	1889	2846	2237	2157	3219	3212		1335	982	916	1109	2504	1266	1173	1369		2289	2178	3160	1592	1612	3423	1829	2062	3423
	3165	2663	1896	3160	3973	1652	2169	2526	2146	3310	4225	3653	2015	2494		1213	1193	937	1807	2323	1086	1090	1876		2194	1711	2638	1803	1707	3531	2941	2667	3493
	1913	3354	3309	2512	3510	1640	1959	2073	2705	2502	3374	3435	1914	2356		1212	1120	1429	1799	1407	1126	1075	750		2117	2249	2239	1800	3152	2442	3588	1850	3280
	1888	3364	3269	2074	3556	2539	2802	1968	2144	2141	2179	2282	2596	3402		1870	1989	1832	1253	1308	1466	947	1198		2949	1636	2182	1854	2426	2388	3319	1797	3060
	1998	2390	2111	2147	2358	3766	2395	2721	1867	2003	2037	2053	1716	3489		1296	1178	1725	1179	1244	1038	1015	1239		3490	1699	2360	3649	1472	2545	1878	2099	2984
	1741	2163	1856	1874	2647	4337	4688	4006	2155	2265	2311	2242	2594	2413		1175	1118	2202	1077	2586	1069	1451	1331		3412	3442	3180	3515	2857	4364	3039	1741	1792
	1679	1920	1915	2479	2625	3873	2875	3589	2441	1928	2368	3106	2068	2476		1460	1124	1862	1065	2543	1082	1284	2061		2826	2719	3373	2871	2064	3710	2314	2693	2209
	1852	1970	2300	3125	2395	2728	3211	2309	2159	2335	2399	2487	1796	2249		1318	1076	1796	994	1696	1016	1004	2000		2164	1822	3415	2101	2671	2591	1993	1878	3244
	1830	2460	1828	2356	2623	2311	2156	1874	2350	2353	2227	2099	1917	2499		1849	1109	2468	988	1586	1015	1003	1547		1903	1922	2047	1786	2424	2100	2368	1766	3029
	3419	2047	1918	2571	2624	2176	1908	3303	2021	2266	2170	2336	3388	2910		1665	1022	1598	1097	1609	1500	1635	1461		2062	1713	2359	2313	2184	2046	2026	1894	2145
	2998	3225	1765	2321	2322	2365	2102	2342	2700	2468	3003	2713	3099	2575		1214	1054	1488	1507	1534	2265	1343	1436		2154	2079	3039	3001	2038	3369	1737	1756	2323
	2966	3588	2868	2130	2444	2931	2392	2303	2025	3011	2218	2161	2247	2504		1129	1169	1509	1273	2059	2176	1259	1619		2358	1902	3164	2058	2182	2076	2094	1839	2948
	1875	3382	2687	2160	2437	3604	2237	2747	2214	1973	2178	2470	1696	2773		991	1636	1467	1812	2098	1367	1144	1351		2387	1880	2328	1818	1982	2065	3160	2675	2540
	1911	2274	2766	2288	2529	3735	2858	3435	2913	2042	2419	2217	1931	2240		1137	1670	2406	1208	1699	1381	1233	1284		2291	1768	2215	1849	2286	2151	2169	2690	1942
	1627	2112	2052	2171	2358	2731	2105	3487	3084	1956	2246	2868	2379	2430		1553	1176	1624	1115	1590	1259	1682	1290		2939	2024	2350	1785	2260	2016	1807	1671	2095
	1737	1956	1958	2773	2279	2350	2759	1998	2156	2265	2914	2105	1919	2315		1204	1147	1517	1086	1595	1282	1380	1334		1926	2808	2082	3137	2057	2284	2313	1786	3201
	2743	1820	1827	3139	2262	2229	2293	2043	2918	2855	3396	2267	1880	2953		1128	1119	1473	1101	1634	1715	1249	1201		2272	2502	2329	2929	2025	3365	2994	1986	2216
	1799	2564	1834	2957	2288	2096	2380	2312	2313	3021	2962	2715	2471	3458		1067	1353	1441	1145	1632	1192	1184	2046		2734	1995	2327	1929	2959	2530	1972	1878	2069
	1937	1953	1819	2053	3207	2346	2551	2176	2233	2894	2180	2242	1950	2460		1337	1092	1523	1145	1681	2141	1124	2186		3209	1951	2151	1877	2060	2316	1933	1707	2286
	1659	2136	1890	1986	3592	2266	2260	2105	1931	1865	2257	2164	1869	2508		1389	1009	1841	1269	2193	2100	1127	1654		3223	2035	2796	1749	2026	2141	1917	1749	2369
	2650	1963	2096	2017	3233	3014	2311	2378	2278	1912	2768	1897	1840	2265		1706	1055	2058	1701	2437	1489	1528	1193		2142	2958	3171	1758	2457	2575	2075	1821	2248
	2464	2963	1881	2065	2343	4053	2747	3250	2365	1868	2278	3042	2752	2175		1354	1956	1978	1334	1911	1382	1843	779		2032	1730	2770	1934	2096	2127	1781	1794	2219
	1803	2876	2341	2000	2569	3328	2938	2182	1981	1995	2271	2093	1930	3495		1266	1123	1735	1835	1551	1386	1685	1284		2249	1889	2216	1976	2245	2026	3240	2501	3000
	1828	2090	2216	2182	2469	2752	1930	2083	2077	2056	2135	2906	2375	3352		1256	978	1556	1777	1473	1416	1194	1187		2160	2234	2084	1823	2593	2455	2948	2628	2982
	2262	2036	2040	3077	2418	2993	2174	2790	2102	2041	3134	1952	1871	2501		1687	1293	1539	2082	1602	1331	1093	715		2270	2024	2222	3150	2195	2765	1828	2700	1973
	2132	1995	2181	2599	2284	2509	2187	3327	2337	3001	2304	2084	3190	2119		1849	1243	1560	1919	1844	1242	1133	698		2928	3014	2668	2954	2517	3724	2100	1540	2181
	2331	3511	1945	2111	3767	2353	2063	2192	2534	1990	2026	2777	2950	2972		1624	1290	1424	1649	1411	1713	1353	2036		3418	2703	2100	1930	2210	3507	3284	1729	2029
	1803	3479	2047	2196	3564	4397	3142	2201	2143	1896	2844	1915	1768	2398		1944	1295	1821	1651	1600	2076	1168	1343		3342	1981	2375	1841	2278	3250	2213	1651	2254
	1990	2373	2460	1975	2300	2928	2678	2631	2114	2091	3512	2251	1861	2322		1067	1418	2200	1593	2079	2284	1159	2250		2165	1965	2301	1839	2125	2273	1785	1645	1889
	1816	1983	1991	1957	2460	4209	2204	3064	2146	2042	3265	3264	2874	2148		1884	1422	2566	1549	1810	1615	987	913		2023	1929	2468	1797	2551	2130	2122	2285	3199
	2947	2496	2015	3115	2545	3542	1850	2191	3073	2906	1926	3325	1832	2330		1247	2013	1540	1523	1921	1557	1211	832		2061	1965	2098	1662	2657	1993	1997	2546	2631
	2060	1976	3483	3354	3964	2849	1986	3235	2653	2098	1944	3257	1942	3653		1175	1145	1515	1751	1675	1556	1659	1042		3847	3033	4041	2920	2175	3217	2815	1654	2157
	2453	2889	1851	2630	3797	2834	2158	2254	2248	2165	2083	2173	1860	3766		1170	1102	1549	1974	1780	1715	1776	2035		3557	2750	3286	2884	2724	3157	2036	1787	1944
	2130	2867	1952	2070	2430	3190	3361	3182	2688	3151	2266	1910	2197	3361		1835	1751	2317	1693	2853	2113	1254	1215		2269	1949	2792	2148	2499	2951	2272	1853	2103
20h	2225	2494	2071	2331	3338	3558	3677	3036	2600	2304	2435	2944	2287	2175	20h	1398	1720	1862	1710	2662	2408	1507	2239	20h	3264	1868	2054	1884	3714	2570	2066	3219	2813
	3407	2303	2804	3794	3779	3198	2639	3784	3362	3288	4207	2920	3251	2306		1785	1899	1938	1844	1925	1911	1758	1647		3165	3553	3562	3400	2993	2496	3199	2955	2316
	3197	2227	2084	3534	4143	4293	3603	3900	3358	3661	3803	3292	3624	2777		1807	1690	1921	1802	2506	1225	1531	1352		3981	3340	3689	3060	2799	3364	3247	3028	2553
	2240	3610	3083	3442	3474	3869	2888	3241	2575	3722	3597	3400	3355	2938		2148	1586	2037	2100	2525	2109	1564	1196		3899	2700	3516	3299	2754	2507	3414	2353	3479
	2868	3364	2393	2137	3613	4311	3267	3989	2455	3365	2879	3624	3132	3728		1895	1580	2229	1753	2025	1889	1932	1603		2994	3274	2978	3001	2761	3859	3816	3262	3292
	3687	3993	3199	2957	4313	4305	2969	4011	2574	2590	3577	2995	3022	2842		2165	1780	2518	1788	2686	1629	2090	1715		2731	2803	3011	3227	3023	3851	3704	3305	3568
	3674	3823	3417	3510	3286	3803	2980	3887	3358	2268	3658	3280	2064	4018		1685	1682	2542	2135	2491	1816	2031	1721		3021	2426	3020	3345	2742	4223	3287	2165	2631
	3153	4221	3175	3317	3760	3379	2213	3506	2862	2850	3646	3396	2816	3862		1506	1797	2057	1828	2831	2453	1840	1254		3209	2595	2716	3143	2904	3950	3435	1980	2738
	3015	4051	2709	2149	4337	3620	2224	4388	3047	2419	3019	3604	3045	2635		1726	2264	2360	1819	2151	2546	1527	2020		2738	2859	3250	2823	2558	3068	3762	1845	2622
	2436	3031	2264	2252	3886	3470	3738	4182	2530	2835	2725	3714	2311	3030		1695	2412	1795	2141	2109	2418	1992	1127		3056	3751	3801	2103	3400	2876	3345	3118	3656
	3576	2497	2085	2316	3129	3415	3348	3938	2525	3554	3013	3243	1961	3592		1721	2102	2702	2289	2113	1881	1610	2274		4011	3308	3711	2287	3773	4379	2979	3468	3598
	2820	3672	2533	3472	2903	3584	3355	4023	2392	3597	4152	3130	2367	3892		1993	2051	1874	2266	2402	1774	1846	2384		3434	2933	3702	1962	2957	3915	3421	2478	3496
	3242	4078	2624	3877	3069	3501	3658	3975	2252	3493	3796	3252	3300	3023		1235	2052	1749	2277	2195	1728	1773	2263		3830	2427	2914	2655	2531	3993	3507	2988	3266
	3256	4145	2093	3997	4413	2904	3271	4128	2554	2480	4071	3476	3596	3076		2143	1705	1658	1550	2072	1928	1130	2492		3452	3606	2572	3462	3375	3449	3709	3444	2492
	3251	4130	3148	3963	4578	3865	3198	3790	2931	2131	3668	4100	3150	2936		1190	1667	1657	1539	2013	1579	1673	2317		2999	3475	3785	3471	3386	3635	3893	3568	2969
	3128	3782	3461	3825	4116	3712	2686	3952	2517	2660	3321	3442	2497	2997		1453	1576	2106	2041	1947	2237	1481	2263		2620	3309	3858	3433	2791	3609	3468	2345	3627
	3817	3003	3415	3789	3452	4410	2228	2869	2827	2787	4124	3673	2802	3857		1894	1506	2467	1841	2415	2365	1490	2167		2571	3380	3787	3596	2536	3820	2673	2341	2448
	4066	2578	2696	3724	3038	4440	3423	3862	2787	3335	3768	3502	3154	3925		1371	1342	1160	1564	2765	1549	1416	1332		3881	3417	3529	3542	2591	3439	3093	3446	3683
	2942	3528	2499	3090	4028	3748	3546	2810	2486	2860	4068	3532	3344	4159		1887	2085	2094	1473	1910	1616	1321	1178		4001	2414	2398	3449	2169	3251	3282	2660	3539
	3459	3732	2148	2221	4151	3663	3453	2877	3598	3635	3720	3028	3181	3359		1533	1753	2067	1444	1767	1363	1797	1144		4068	2734	2684	3236	2991	3625	3778	2282	3021
	3876	4092	1988	2471	4305	2587	3667	3356	2870	3803	3538	2783	2843	3058		1907	1573	2274	1641	1669	1472	1765	1213		3675	2969	3515	3358	2506	2755	3073	3117	3648
	3908	4069	2123	3269	3917	2090	3849	2729	2725	3657	2823	3615	3013	3813		1789	1534	1826	1998	1688	1375	1530	1842		2524	3279	3609	2964	3332	2787	3437	3334	2811
	3332	2592	2234	3032	2983	2231	3681	4063	2657	3077	2713	3611	2426	4009		1727	1542	1647	1599	1557	1654	1332	1205		2575	2326	3570	2923	3260	3983	3197	3353	3661
	2354	2667	2050	2328	2647	2170	2449	3293	2385	2492	3356	2469	2520	4180		1544	1449	1602	1386	1510	2029	1354	1398		2212	2490	3234	2039	2087	3876	3682	2117	2876
	2297	2219	2076	2346	3038	4263	2177	2625	2255	3437	3999	3561	3070	3872		1419	1306	1634	1629	1853	1842	1239	1418		1872	1889	2160	1762	2497	4012	2893	1800	2113
	2074	2090	2797	2094	3009	4298	2160	2220	2155	3526	3873	3397	3238	2884		1346	1410	2169	1982	2089	1544	1147	1374		2209	2058	2060	1776	2026	3109	2477	1836	1874
	2110	2025	2123	1987	3336	3907	2012	2768	3201	2691	3328	2843	2648	2851		1254	1683	1693	1566	1546	1930	1282	1648		2047	2025	2196	1894	2510	2372	2093	2250	2519
	2243	2070	2352	2360	3966	3547	2044	3695	2371	2430	2677	2506	2274	3334		1548	1772	2074	1444	1778	2331	1809	1929		2202	2010	2350	2242	1937	2196	2590	1966	1985
	2782	3296	2411	3027	3022	3065	3566	2435	2327	2613	3028	2972	2392	3441		1302	1596	1590	1446	1680	1482	1245	2036		2112	2310	3353	3976	2079	2062	2426	2942	1975
	3307	3774	2483	3444	3475	2190	2898	2631	2356	2865	2783	2945	2819	2828		1511	1446	1523	1314	1970	1354	1173	2344		1923	1927	3133	3241	2359	2229	3102	2034	2117
	3636	2678	2046	2605	2860	2212	3740	2322	2700	2787	2835	3272	1965	3073		1624	1480	1592	1298	2045	2259	1023	1626		3175	2091	2249	3274	3116	2089	3170	2138	2140
	2298	2595	2102	2490	2764	2328	3463	3311	2436	2388	3673	2696	2602	3230		1883	2134	1808	1180	1769	2054	1832	2418		2173	2216	2508	3328	2280	2052	2575	1845	3410
	2364	3570	2987	2896	2723	2165	2698	4133	2208	3050	3829	3554	2156	3672		1144	2006	1419	1147	1748	1788	1548	2293		2741	2118	2213	2274	1848	2196	2429	3593	3117
	2654	3642	2280	3739	3786	2592	2242	3953	2023	2403	2551	3072	3076	2927		1751	1358	1667	1558	1781	1676	1408	2297		3424	2101	3163	2552	3001	3315	3307	3337	3139
	2429	4095	2763	3573	2788	4341	2761	2814	2019	2989	2394	3441	2122	3772		1818	1398	2577	2049	2072	1734	2001	2603		2291	3834	2457	1938	2987	2512	2550	2369	2204
	3660	3854	2964	2766	3448	3899	2859	2355	2643	3422	2285	3135	3289	3028		1759	1948	1743	1561	2305	2299	1730	2413		2131	3050	2679	1845	2040	3853	3687	3312	2172
	3932	2559	2910	2331	3795	2885	3990	2937	2264	2845	4125	3657	2935	3049		1978	2236	1733	1430	2002	1834	1742	1901		3344	2071	2330	3484	1828	3593	2843	3458	3436
	3745	2456	2043	3714	3808	1988	3246	3928	2532	2343	3851	3609	2164	4073		2258	1904	1666	1870	2637	2434	1647	1347		3188	1970	3360	3187	2974	2578	2643	3449	3489
	3526	3776	3097	3707	3313	1633	3898	3847	2945	3046	3849	2442	3126	3852		1907	2131	2297	1470	2370	1599	1669	1323		2708	3517	2392	3111	2702	2353	3517	2294	3188
	2372	3519	2946	3513	3588	1774	3721	3501	2737	3065	3907	2118	2716	2242		1602	1610	1632	1163	2007	2072	1088	1412		3415	2958	3264	2873	1832	2185	2753	2936	3020
8h	2022	4164				1846	3325	2423	3287	2507	2155	1930	3085	3111	8h	1530		1552		1826	1607	1342	2223	8h		2299	3442	1922	1718	3773	1877	3482	2376
	3172	3843				2561	2696	1933	2418	3309	2193	2120				1623		987		1664	1366		1835					1709	2030	4008		3491
	2352	3802				4702	2247	3242	2239	3569	2384	3359				1719		1675		1799	1157		1353					1558	1712	3788		3100
	2719	2754				3873	2366	2066	2134	3366	2361	2359				1963		1221		1582	1260		2034					3771	1792	2932		2734
	3589	2504				3420	2101	4022	2067	1993	3242	1991				1578		1130		1577	1150		1510					3204	3161	2616		1829
	3421	4003				2297	2169	3823	2007	1990	3531	1861				1038		1155		1989	1086		1462					2562	2212	2270		2216
	3216	3643				2311	2187	3526	2010	1941	2568	1876				1774		1513		2255	2036		1913					1786	1566	2218		1816
	2100	3485				1707	3048	2285	2844	2273	2065	2303				1208		1303		2574	1968		1418					1568	1864	2359		2933
	1844	3552				2046	3799	1927	2626	2843	2118	2530				1143		1679		1819	2105		1295					3945	1656	2032		2870
	2000	2230				2305	2983	1873	2957	2317	2112	3281				1346		1329		1630	1500		1736					2850	2279	2032		2884
	2592	1978				3952	2088	2537	2186	2127	2733	2469				1155		1354		2056	1366		1287					1936	1972	2198		1933
	2179	2303				3087	1953	2012	2054	2033	2285	2038				1062		2027		1556	1904		1211					1611	1826	2244		1743
	2980	2185				1815	1956	2234	2098	2022	2238	1965				882		1650		1586	1367		1229					1638	2063	4043		1590
	2163	2956				1785	2557	3486	2266	2013	1999	1995				1832		1493		2300	1328		1478					1821	2170	3332		1923
	2335	3274				2080	2245	3269	1982	3026	2159	2277				1445		1481		2401	1261		1312					1886	1809	3096		2562
	3242	3371				2780	2401	2067	2358	3088	2614	2971				1868		2490		1667	1386		1316					3541	1907	1990		2004
	3065	2448				3412	2311	2413	2845	2820	2035	2100				1200		1513		1827	1237		1274					2694	2676	1936		1699
	2078	2107				2198	2242	2812	2774	1988	2167	2095				1197		1517		1520	1176		1911					1714	1860	2325		1852
	2226	2029				2110	2467	2189	2154	1892	2532	2341				1010		2202		1775	1382		2201					1555	1691	1891		1878
	1827	1960				2345	2023	2138	2210	2093	3172	2176				1069		1655		1942	1528		1539					1742	2142	2257		1871
	1841	2009				2700	2136	2269	2299	2117	2128	2876				1116		1525		2475	2210		1405					3197	1749	1948		1751
	2182	1942				2058	2171	3166	2265	2025	1948	1970				1004		1523		1836	1422		1329					2476	1727	2175		1830
	2972	2210				2346	2222	2199	2769	2767	2320	3119				1125		1595		1576	1262		1644					1639	1975	3028		1698
	2481	2228				3296	2277	2460	2047	1839	2181	2873				1013		1235		1614	1768		1645					1845	2050	2325		2040
	1895	2055				2953	2380	3214	2070	2195	2952	2017				1401		1289		1501	1194		1610					1831	1806	2145		1747
	1999	2101				1913	3190	2531	2193	1970	2035	2192				1364		2049		1483	1109		1178					1662	1744	1977		2498
	1886	2060				2384	4202	1911	2370	2944	2014	2097				1129		1418		1495	1133		1222					2268	1666	2186		2688
	1898	2007				2436	2724	2002	2944	2025	2012	1951				1147		1215		1550	1093		1213					1674	2878	2264		1936
	2837	3037				2185	2607	2027	2956	2003	2243	2979				1292		1418		1554	2072		1443					1635	2347	2554		1824
	2169	3132				2072	1814	3150	2173	2052	2672	2183				1182		1296		2271	2216		1917					1986	1747	3370		1775
	2170	2044				3602	2018	3252	2285	2392	2071	1899				1138		2050		2244	1583		2201					1725	1880	3174		1772
	1928	1924				2046	2071	2147	2537	1861	2065	1934				1229		2201		1773	1589		2213					1793	2632	2078		1790
	2739	2315				1815	2087	2081	2300	2206	2876	2144				1156		2464		1501	1480		1995					3494	1636	1898		1810
	1862	1992				2316	2186	2190	3065	2061	2243	3284				1154		1854		1791	1618		1473					2799	2004	1924		1741
	2109	3077				3613	2317	3273	2661	2015	2563	2314				1371		1544		1552	1348		1413					2300	2523	3569		2444
	3246	3252				3723	4183	2274	2237	2805	2151	1886				1655		2082		2570	1864		1348					3861	2881	3340		1768
	2997	2315				3615	3418	2028	2491	2666	2096	2028				1619		1705		2376	2171		1252					2933	2386	3607		1903
	1714	2097				2632	3517	3022	3164	1972	2214	3043				1254		1641		2132	1763		1323					1868	2543	2650		2955
	2525	2036				3353	2918	3687	3464	1830	3488	2539				1630		1651		2283	1611		1876					1698	2368	2400		2090
	2012	3047				3392	2151	3161	3495	2008	2557	2063				1249		1608		1964	1618		2021					2957	2353	2416		1695
20h	2020	2833				3314	3208	2748	3278	3043	3190	3114			20h	1296		1965		2358	1730		1678	20h				3072	2964	2416		1889
	2123	2448				3225	2231	4116	2736	2922	3643	3803				1377		2808		2283	2307		2499					2271	3130	2342		3071
	2242	2443				3690	3278	4030	2344	2419	2829	3314				1370		2801		2099	1874		2417					3212	2965	3843		3396
	3403	2928				4037	4048	4101	3217	2620	3274	2758				1361		2398		2650	2255		2195					3263	2768	3916		3179
	2921	3068				4057	3590	4001	2787	3342	3332	3162				1774		2198		2598	1829		1560					3239	3317	3165		2331
	2503	2950				3652	3873	3997	3777	3423	3459	3202				1559		1944		2847	1994		1037					3270	2601	3159		2717
	2709	4066				3521	3219	3932	3862	2636	3949	2711				1394		2519		2263	2489		1312					3262	2553	3409		2261
	2447	4157				3529	2459	2788	3520	2971	3652	2716				1237		1918		2025	2163		2192					2995	3453	3416		2224
	3271	3815				3287	3447	3321	3773	3196	2967	3390				1317		1705		1875	1226		2256					2157	3293	3222		3331
	3887	3919				3198	3063	3905	2682	3197	2654	3228				1558		2196		2363	1786		2499					1988	2528	4039		2552
	3971	2932				3958	3654	4054	2600	3057	3480	3605				1442		2092		2398	1761		1500					3121	3129	3683		2688
	2643	3444				3439	3443	3719	3151	2764	3587	3651				1259		1749		2013	2383		1978					3281	2801	4259		3166
	2916	4410				4017	2848	3107	3828	2696	4058	3678				1233		1697		1940	1654		1463					2893	3126	3349		3207
	3353	4249				2896	2531	3873	3072	3676	3686	2984				1345		2537		1905	1129		944					2163	2753	4012		2624
	3349	4106				3436	2342	3728	3763	2813	3638	3504				1600		1890		2499	1683		2265					2125	2400	3913		2994
	2653	3033				2763	4186	3401	4069	3277	3989	3530				1888		1749		2696	1678		1548					1956	2827	4487		3297
	3854	3725				3460	3231	2619	3524	2603	3904	3656				1413		2109		2189	2264		1717					2600	3513	4121		2323
	4047	3570				3750	3593	3519	2977	2884	3655	3772				1658		2180		2033	1908		2412					3352	2735	3326		2273
	3900	2861				3146	3698	4074	2814	3419	2844	3670				1271		2451		2016	1553		1884					3544	2540	3258		2050
	3540	3496				3418	3640	2754	3400	3537	3171	2796				1555		2088		1860	2268		1248					3512	2236	3578		2947
	3476	3845				3633	3727	3098	2890	2564	2773	2669				1456		2428		1814	2424		894					3379	2292	3444		3377
	3226	2823				2878	4022	2737	3192	2565	3936	2561				1235		1867		2438	1792		991					2486	2566	3215		3181
	2232	2538				3804	2714	2609	3744	2451	3712	3757				1215		1668		1585	1666		1403					2009	3361	3962		3204
	2191	2566				4014	2412	3085	4067	2749	3575	2756				1531		1689		1533	1576		1363					1964	2821	3005		1940
	2441	2820				3324	2209	2206	4015	2272	2856	3393				1429		1616		1550	1697		1600					2097	2146	3203		1804
	3735	2857				2300	2271	2004	3467	2349	2451	2889				1355		1525		1458	1497		1419					1753	1994	3820		1721
	3667	2715				2203	2018	2166	2726	2245	3094	3356				1232		2031		1370	1477		1388					1633	2566	2806		2538
	2427	3555				3537	2173	1936	2933	2688	2872	3318				1237		2051		2389	1761		1906					4031	2051	3656		1791
	2477	3109				2502	2361	2776	3634	2089	3592	3084				1240		1670		2198	2299		2280					3047	1890	2693		1765
	2619	2710				2319	2477	2928	2755	1990	3194	3154				1185		2395		2282	2213		1746					3026	2892	2614		1796
	2542	3073				2317	4766	2469	3078	2006	2613	3028				1236		2254		1890	1599		2194					3138	2358	3285		3303
	3106	2747				3602	3550	3324	3938	1988	2767	3671				1547		2370		1875	1569		2206					1973	2020	2931		2178
	3532	3082				3673	4018	2677	2697	3282	2808	3039				1337		1956		2057	1541		1377					1894	2284	3841		2844
	2831	3977				3135	3264	3376	3765	2317	3846	3685				1789		2037		1987	1770		2465					4025	2376	2736		2890
	2043	4160				2137	2707	2538	3030	2653	3710	3490				1587		1616		2135	2285		2396					3013	2596	3650		3216
	2399	3388				1880	2155	3704	4095	2759	2400	3348				1642		2036		2007	2177		2381					2676	1833	3644		3147
	2372	3007				2565	2131	3659	3864	2208	2479	3490				1575		2171		2357	1923		1257					2046	2933	3063		2214
	3669	2650				3697	4364	2643	3142	3321	3955	3682				1724		1467		2491	1532		1732					3341	2729	2349		2767
	3827	2435				2182	3355	2748	3060	3118	3763	3477				1800		1424		1865	1800		2099					3382	1978	3756		3183
8h	3600	2476				1655	4153	2080	3618	2370	3387	3245			8h	1857		1662		2235	2333		1406	8h				3294	1779	3585		3284

## Sheet: Fig 5G
Respiratory exchange ratio
Dark phase				Light phase				24h
Ubi	LepRNull	Ubi-LepRNull		Ubi	LepRNull	Ubi-LepRNull		Ubi	LepRNull	Ubi-LepRNull
0.960581	0.961813	0.963449		0.904492	0.964775	0.907388		0.930042	0.958088	0.937294
0.965288	0.983507	0.928272		0.915858	0.994963	0.935942		0.944038	0.990163	0.943292
0.964949	0.980638	0.95725		0.910125	0.967833	0.922925		0.937456	0.975158	0.933671
0.927462	1.04571	0.948863		0.860425	1.03475	0.905058		0.88975	1.04432	0.930283
0.956343	0.98355	0.98415		0.8648	0.964533	0.91205		0.9093	0.9782	0.945325
0.965401	1.00199	0.990038		0.892383	0.988217	0.952333		0.928721	0.995808	0.976517
0.973536	0.999775	1.02947		0.882833	0.993033	0.9999		0.9312	1.00771	1.01025
0.979317	0.996363	0.948006		0.9497	0.969183	0.895433		0.962921	0.9857	0.918263
0.989943		0.975258		0.970683		0.936675		0.984154		0.954467
0.9598				0.951217				0.957188
0.937775				0.883342				0.912817
0.946969				0.873358				0.913213
0.966075				0.961967				0.969483
0.95055				0.917275				0.933404
0.969683				0.920492				0.940871
0.962867				0.937367				0.949892

## Sheet: Fig 5H
Respiratory exchange ratio
Time of day	Ubi																Time of day	LepRNull								Time of day	Ubi-LepRNull
18h	0.896	0.916	0.977	0.896	0.911	0.965	0.898	0.959	0.824	0.871	0.795	0.947	0.949	0.805	0.942	0.92	18h	0.982	0.956	0.96	0.997	0.906	0.947	0.856	0.895	18h	0.864	0.868	0.795	0.945	0.962	0.893	0.968	0.903	0.824
	0.9	0.893	0.964	0.85	0.9	0.981	0.858	0.971	0.886	0.853	0.857	0.931	0.94	0.832	0.902	0.974		0.996	0.954	0.943	0.947	0.894	1.003	0.849	0.979		0.891	0.875	0.784	0.96	0.986	0.92	0.975	0.932	0.842
	0.981	0.848	0.978	0.915	0.918	0.994	0.899	0.927	0.919	0.892	0.945	0.958	0.891	0.797	0.924	0.985		1.009	0.933	0.962	0.97	0.902	1.017	0.889	0.986		0.839	0.872	0.793	0.943	1.027	0.929	1.015	0.911	0.952
	0.925	0.864	0.975	0.899	0.92	0.96	0.811	0.991	0.92	0.877	0.913	0.925	0.883	0.848	0.922	0.946		1	0.905	1.004	0.996	0.928	1.042	0.892	0.962		0.881	0.852	0.852	0.934	0.976	0.928	0.975	0.94	0.949
	0.964	0.939	0.969	0.922	0.895	0.986	0.839	0.99	0.939	0.883	0.936	0.936	0.97	0.82	0.889	0.952		0.963	0.907	0.968	0.966	0.931	1.034	0.891	0.978		0.825	0.862	0.812	0.96	0.999	0.916	1.007	0.975	0.965
	0.963	0.953	0.981	0.928	0.857	0.97	0.956	0.993	0.892	0.835	0.947	0.938	0.973	0.882	0.924	0.999		0.995	0.9	0.943	0.999	0.889	0.959	0.914	0.953		0.858	0.917	0.833	0.925	0.998	0.936	1.004	0.94	0.975
20h	0.964	0.959	0.982	0.882	0.925	0.95	0.895	1.024	0.941	0.919	0.987	0.95	0.944	0.867	0.876	0.944	20h	1.006	0.931	0.928	0.999	0.972	0.976	0.892	1.009	20h	0.936	0.951	0.871	0.955	0.979	0.911	0.993	0.979	0.959
	0.962	0.998	0.967	0.889	0.918	0.97	0.946	0.967	0.897	0.933	0.943	0.928	0.968	0.903	0.881	0.985		0.997	0.895	0.96	0.988	0.915	0.951	0.902	0.912		0.937	0.892	0.978	0.995	0.993	0.938	1.012	0.957	0.931
	0.952	0.992	0.976	0.899	0.934	0.963	0.92	1	0.906	0.964	0.925	0.957	1.029	0.865	0.959	1.012		0.993	0.936	0.969	0.975	0.927	0.986	0.877	0.939		0.917	0.897	0.937	0.977	0.982	0.904	1.058	0.96	0.978
	0.937	0.968	0.981	0.953	0.946	0.967	0.919	0.996	0.95	0.922	0.93	0.953	0.965	0.887	0.898	0.947		0.979	0.99	0.974	0.997	0.938	1.007	0.92	0.987		0.941	0.878	0.933	0.983	0.982	0.949	1.001	0.966	0.952
	0.979	0.98	1.02	0.951	0.949	0.992	0.988	0.975	0.92	0.966	0.925	0.967	0.974	0.881	0.933	0.948		1.036	0.979	0.942	1.003	0.922	0.97	0.9	0.94		0.989	0.899	0.961	0.954	0.988	0.968	1.002	0.994	0.951
	0.955	0.961	1.01	0.937	0.952	0.985	0.909	0.999	0.954	0.982	0.932	0.945	0.991	0.898	0.922	0.966		0.98	0.954	0.959	1.028	0.95	0.999	0.916	1.018		0.989	0.938	0.972	0.961	1.002	0.933	1.019	1	0.959
	0.963	0.981	0.984	0.943	0.929	0.976	0.995	0.983	1.006	0.942	0.914	0.929	0.974	0.902	0.916	0.958		0.972	0.994	0.973	0.984	0.954	0.982	0.959	0.972		0.935	0.944	0.903	0.956	0.98	0.971	1.028	1.002	0.982
	0.945	0.96	0.992	0.948	0.933	0.973	0.938	1.007	1.03	0.973	0.897	0.962	0.983	0.96	0.951	0.94		1.032	0.973	0.948	1.021	0.943	0.975	0.913	0.925		0.947	0.918	0.931	0.964	0.989	0.93	1.02	0.977	1.006
	0.93	0.967	0.986	0.981	0.972	0.975	0.965	0.985	0.961	0.944	0.915	0.955	0.978	0.923	0.949	0.962		1.022	0.961	0.986	1.032	0.945	0.977	0.958	0.973		0.994	0.936	0.943	0.955	0.988	0.979	1.028	0.97	0.987
	0.949	1.001	1.055	0.918	0.973	0.991	0.924	1.001	0.998	0.943	0.948	0.951	0.99	0.943	0.929	0.954		0.97	0.95	1.001	1.014	0.956	1.007	0.941	0.939		0.982	0.955	0.91	0.971	1.02	0.956	1.004	0.996	1.011
	0.994	0.969	0.979	0.934	0.929	0.986	0.931	0.975	0.967	0.938	0.917	0.938	0.987	0.922	0.948	0.979		1.017	0.971	0.976	1.002	0.963	0.99	0.942	0.953		0.967	0.919	0.891	0.97	1.011	0.95	1.034	0.971	0.991
	0.974	0.957	1.016	0.975	0.985	0.971	0.971	0.994	1.053	0.954	0.93	0.949	1.003	0.937	0.935	0.958		1.014	0.984	0.934	1.001	0.967	0.986	0.928	0.963		0.978	0.909	0.933	0.955	0.998	0.98	1.032	0.989	0.976
	1.001	0.977	1.019	0.979	0.973	0.976	0.961	0.977	1.05	0.982	0.931	0.942	1.011	0.927	0.955	0.989		0.971	1.006	0.975	1.013	0.97	0.978	0.975	0.959		0.94	0.938	0.929	0.982	1	0.965	1.04	0.968	1.007
	0.968	1.005	0.998	0.967	0.957	0.963	0.953	0.98	0.969	0.945	0.911	0.972	0.964	0.922	0.951	0.987		0.978	0.962	0.977	1.014	0.949	0.979	0.965	0.952		0.978	0.968	0.945	0.975	1.008	0.981	1.027	0.965	0.995
	0.987	0.985	1.031	0.965	0.984	0.958	0.995	0.993	1.006	0.965	0.951	0.973	1.004	0.931	0.973	0.964		1.019	0.972	0.966	1.05	0.985	1.015	0.94	0.984		0.978	0.941	0.919	0.957	0.983	1.009	1.025	1.01	1.021
	0.952	0.976	1.007	0.951	0.979	0.984	0.957	1.01	0.98	0.975	0.931	0.969	0.998	0.935	0.993	0.983		0.978	0.989	0.956	1.013	0.953	1.021	0.958	0.993		0.967	0.991	0.915	0.985	0.995	0.952	1.037	0.996	1.003
	0.955	0.991	1.019	0.977	0.995	0.995	0.961	0.996	0.995	0.975	0.948	0.939	0.982	0.924	0.964	0.973		0.987	1.009	0.989	1.057	0.976	0.996	1	1.029		1.006	0.943	0.977	0.965	1.01	0.978	1.043	0.989	0.993
	0.973	0.969	1.003	0.971	0.98	0.981	0.979	0.997	0.997	1.002	0.952	0.956	0.987	0.904	1.003	0.979		1.005	1.016	0.991	1.037	0.97	1.032	0.98	1.005		0.959	0.907	0.967	0.975	1.023	0.968	1.028	0.996	0.983
	1.022	0.989	1.001	0.95	0.973	0.998	0.961	0.979	0.957	0.997	0.94	0.975	1	0.926	0.976	0.981		1.022	0.959	0.999	0.997	0.974	0.992	0.964	0.986		0.956	0.854	0.926	0.935	0.995	0.986	1.044	0.97	0.989
	1.006	0.983	1	0.976	0.96	0.997	0.991	0.975	1.001	0.972	0.924	0.947	0.968	0.932	0.963	0.975		0.984	0.98	0.97	1.02	0.975	1.008	0.986	0.994		0.958	0.945	0.936	0.963	0.997	0.967	1.044	0.972	0.995
	1.008	0.958	1.012	0.964	0.979	0.987	0.99	1.02	0.991	0.983	0.946	0.961	0.998	0.93	0.946	0.92		0.982	0.974	0.953	1.036	0.973	1.003	0.951	0.977		0.98	0.943	0.967	0.938	0.992	0.956	1.013	1.004	0.96
	0.963	0.977	0.978	0.944	0.963	0.988	0.962	1.009	1.005	0.948	0.911	0.939	0.999	0.927	0.968	1.009		0.998	1	0.965	1.037	1.007	0.991	0.964	0.996		0.951	0.905	0.93	0.913	1.045	0.954	1.077	0.983	0.977
	0.997	0.956	0.996	0.947	0.96	0.984	0.978	1.005	0.973	0.978	0.949	0.948	0.973	0.92	0.945	0.967		0.985	1.032	0.991	1.048	0.961	1.003	0.963	1.012		0.97	0.908	0.968	0.926	0.984	1	1.034	0.989	0.985
	0.981	0.945	0.987	0.939	0.998	0.961	0.955	1.004	0.976	0.951	0.926	0.905	0.991	0.913	0.95	0.946		1.001	0.972	0.988	1.046	0.968	0.996	0.982	0.992		0.954	0.848	0.953	0.866	0.98	0.99	1.038	0.959	0.986
	0.997	0.913	1.006	0.916	0.981	0.981	0.956	0.986	0.958	0.926	0.887	0.843	0.98	0.921	0.959	0.972		0.995	0.965	0.988	1.028	0.963	1.001	0.987	1.022		0.946	0.841	0.959	0.919	1.038	0.967	1.055	0.97	0.959
	0.978	0.891	0.962	0.918	0.952	0.952	0.937	1.021	0.993	0.913	0.975	0.908	0.949	0.934	0.967	0.97		0.974	1.028	0.984	1.033	0.929	0.997	1.019	1.003		0.956	0.838	0.932	0.892	1.043	0.943	1.098	0.976	0.984
	0.972	0.878	0.942	0.9	0.986	0.919	0.933	0.986	0.918	0.852	0.935	0.863	1.006	0.936	0.927	0.908		0.999	0.994	0.975	1.043	0.954	1.003	0.961	0.984		0.948	0.843	0.922	0.837	1.014	0.979	1.046	0.986	0.967
	0.95	0.824	0.936	0.878	0.97	0.933	0.912	0.982	0.914	0.903	0.942	0.784	0.955	0.872	0.919	0.974		0.968	0.97	0.953	1.028	0.959	0.971	0.984	0.957		0.943	0.835	0.947	0.89	1.015	0.934	1.048	0.937	0.957
	1.003	0.829	0.971	0.852	0.955	0.971	0.98	1.004	0.932	0.893	0.927	0.818	0.96	0.898	0.928	0.934		1.001	0.95	0.978	1.034	0.939	0.985	0.967	1.005		0.923	0.848	0.967	0.842	1.012	0.951	1.071	0.963	0.989
	1.005	0.817	0.885	0.924	0.925	0.947	0.909	0.992	0.924	0.958	0.885	0.86	0.919	0.951	0.941	0.97		0.946	0.979	1	1.028	0.984	1	0.973	0.971		0.928	0.813	0.943	0.829	1.015	0.97	1.078	0.895	0.955
	0.975	0.901	0.941	0.929	0.965	0.916	0.916	1.004	0.911	0.902	0.873	0.894	0.959	0.947	0.91	0.935		0.945	0.978	0.96	1.072	0.939	1.04	0.961	1.004		0.925	0.833	0.976	0.817	0.97	0.947	1.051	0.906	0.977
	0.965	0.91	0.938	0.921	0.941	0.926	0.89	0.946	0.918	0.917	0.877	0.876	0.934	0.912	0.944	0.958		1.052	0.98	0.994	1.04	0.961	0.987	0.949	0.934		0.862	0.846	0.941	0.809	0.987	0.957	1.045	0.893	0.957
	0.974	0.95	0.895	0.922	0.955	0.98	0.981	0.981	0.919	0.977	0.907	0.905	0.924	0.925	0.948	0.953		0.971	0.973	1.001	1.062	0.96	0.97	0.962	0.979		0.956	0.805	0.963	0.859	1.047	0.958	1.058	0.911	0.988
	0.99	0.957	0.866	0.957	0.929	0.966	0.965	0.973	0.959	0.963	0.902	0.899	0.891	0.891	0.955	0.958		0.979	1	0.983	1.042	0.942	1.026	0.944	0.972		0.905	0.789	0.909	0.866	1.009	0.925	1.074	0.955	0.953
	0.978	0.951	0.816	0.953	0.948	0.958	0.948	0.958	0.968	0.958	0.944	0.919	0.909	0.886	0.945	0.969		1.003	1.006	0.989	1.059	0.97	1.005	0.963	0.954		0.924	0.812	0.91	0.904	0.988	0.926	1.072	0.927	0.967
	1.002	0.96	0.834	0.969	0.972	0.964	0.975	0.994	0.986	0.964	0.877	0.941	0.917	0.953	0.973	0.957		0.985	0.971	1.008	1.092	0.976	1.017	0.96	0.971		0.958	0.788	0.979	0.896	1.014	0.974	1.036	0.968	0.957
	0.991	0.965	0.949	0.955	0.961	0.933	0.956	0.965	0.986	0.94	0.911	0.954	0.903	0.964	0.977	0.94		0.985	0.981	0.979	1.069	0.967	1.001	0.95	0.975		0.971	0.812	0.966	0.932	0.976	0.943	1.062	0.961	0.979
	0.971	0.967	0.937	0.947	0.957	0.947	0.945	0.985	0.944	0.956	0.929	0.97	0.92	0.93	0.984	1.017		0.997	0.973	0.98	1.045	0.953	1.051	0.97	0.971		0.985	0.837	0.974	0.957	1.008	0.987	1.111	0.971	0.968
	0.98	0.947	0.931	0.975	0.921	0.935	0.972	0.969	0.954	0.96	0.917	0.94	0.937	0.916	0.959	0.971		1.001	1.024	0.974	1.029	0.968	1.005	0.951	1.011		0.969	0.825	0.944	0.956	0.975	0.932	1.049	0.98	0.965
	0.974	0.959	0.966	0.959	0.958	0.968	0.957	0.97	0.983	0.954	0.898	0.963	0.925	0.947	0.972	0.962		1.006	0.982	0.988	1.057	0.967	1.031	0.989	1.03		0.952	0.804	0.975	0.976	0.997	0.954	1.07	0.989	0.981
8h	0.959	0.977	0.956	0.964	0.93	0.946	0.962	0.968	0.981	0.965	0.915	0.949	0.928	0.944	0.982	0.972	8h	0.977	1.05	1.01	1.046	0.977	1.02	0.989	1.022	8h	0.918	0.882	0.956	0.938	0.984	0.981	1.062	0.971	0.986
	0.937	0.964	0.995	0.936	0.907	0.983	0.978	0.944	0.998	0.964	0.913	0.93	0.956	0.948	0.982	0.971		0.969	1.022	1.018	1.079	1.001	1.016	0.957	0.981		0.964	0.913	0.984	0.97	1.013	0.968	1.044	0.973	0.973
	0.969	0.965	0.941	0.953	0.877	0.977	0.93	0.954	0.994	0.952	0.89	0.932	0.963	0.925	0.973	0.94		0.968	1.057	0.982	1.067	0.988	1.055	1.014	0.961		0.908	0.937	0.972	0.945	1.016	0.964	1.083	0.976	0.976
	1.016	0.935	0.965	0.961	0.958	0.931	0.946	0.962	0.971	0.995	0.886	0.944	0.95	0.898	0.913	0.961		1.034	1.043	0.997	1.062	1.003	1.038	0.986	1.013		0.957	0.941	1.003	0.95	1.025	0.98	1.04	0.993	0.931
	0.97	0.947	0.98	0.891	0.893	0.994	0.983	0.987	1.049	0.985	0.936	0.965	0.967	0.934	0.943	0.965		1.031	1.016	0.991	1.084	0.986	1.043	1.01	1.071		0.971	0.941	0.963	0.98	1.016	0.971	1.106	0.976	0.98
	0.964	0.923	0.964	0.876	0.882	0.944	0.903	0.938	0.968	0.998	0.921	0.927	0.95	0.931	0.938	0.933		0.926	1.04	1.021	1.113	0.972	1.017	0.992	0.958		0.971	0.958	0.981	0.98	1.031	0.947	1.084	0.972	0.944
	0.993	0.944	0.933	0.895	0.888	0.977	0.942	0.941	0.966	0.988	0.94	0.926	0.952	0.894	0.916	0.949		1.035	1.031	0.994	1.056	0.999	1.022	0.975	1.004		0.947	0.973	1.002	0.998	1.012	0.957	1.046	0.978	0.963
	0.958	0.932	0.919	0.875	0.91	1.013	0.893	0.887	0.972	0.971	0.901	0.923	0.953	0.917	0.895	0.977		1.014	1.035	1.017	1.038	0.996	1.033	0.961	1.003		0.955	0.973	0.994	0.986	1.03	0.996	1.017	0.957	0.95
	0.967	0.881	0.909	0.901	0.855	0.992	0.934	0.937	0.975	0.999	0.888	0.889	0.921	0.931	0.903	0.957		1.005	0.975	1.016	1.184	0.97	1.084	0.966	0.987		0.916	1.002	1.024	0.965	0.983	0.989	1.054	0.989	0.933
	0.933	0.97	0.92	0.876	0.835	0.949	0.964	0.889	0.966	0.966	0.848	0.852	0.905	0.887	0.904	0.953		0.985	0.996	1.003	1.065	0.949	1.004	0.987	0.99		0.881	0.975	0.949	0.943	0.973	0.961	1.036	0.931	0.906
	0.964	0.926	0.891	0.854	0.855	0.955	0.899	0.941	0.98	0.972	0.869	0.836	0.884	0.914	0.922	0.965		0.951	0.962	1.01	1.044	0.95	1.033	0.965	1.021		0.91	0.96	0.993	0.949	0.953	0.994	0.974	0.916	0.893
	0.931	0.963	0.895	0.848	0.802	0.973	0.912	0.9	0.89	0.981	0.82	0.808	0.948	0.89	0.959	0.978		0.994	1.007	0.957	1.072	0.982	0.982	0.958	0.932		0.874	0.977	0.95	0.98	0.986	0.973	1.038	0.857	0.957
	0.965	0.933	0.937	0.812	0.873	0.937	0.875	0.918	0.964	0.974	0.836	0.845	0.931	0.848	0.938	0.918		1.019	0.992	0.957	1.071	0.952	1.003	0.97	1		0.846	0.979	0.999	0.965	0.886	0.953	1.088	0.909	0.952
	0.94	0.924	0.9	0.843	0.827	0.925	0.893	0.859	0.929	0.933	0.789	0.802	0.893	0.933	0.955	0.932		0.976	1.017	0.919	1.064	0.955	0.981	0.941	0.952		0.787	0.908	0.979	0.942	0.929	0.974	0.991	0.866	0.936
	0.933	0.896	0.976	0.823	0.849	0.926	0.846	0.832	0.875	0.968	0.774	0.798	0.937	0.943	0.944	0.968		0.984	1.018	1.047	1.042	0.949	0.965	0.959	0.889		0.822	0.889	0.978	1.011	0.91	0.95	0.999	0.869	0.918
	0.919	0.891	0.95	0.794	0.853	0.967	0.935	0.943	0.938	0.975	0.837	0.827	0.935	0.917	0.925	0.896		0.956	0.933	1.013	1.076	0.95	1.004	0.95	0.986		0.847	0.911	0.978	0.981	0.962	0.967	1.006	0.952	0.909
	0.901	0.944	0.904	0.812	0.828	0.92	0.929	0.92	0.893	0.973	0.793	0.814	0.988	0.914	0.931	0.9		1.014	0.989	1.008	1.027	0.979	0.941	0.956	0.924		0.913	0.948	0.954	0.944	0.907	0.971	1.064	0.92	0.945
	0.91	0.913	0.93	0.774	0.791	0.917	0.916	0.935	0.908	0.989	0.825	0.793	0.962	0.901	0.884	0.85		0.987	1	0.987	1.077	0.944	0.923	0.891	0.915		0.927	0.921	0.935	0.976	0.921	0.963	0.999	0.93	0.934
	0.916	0.931	0.922	0.79	0.818	0.918	0.893	0.93	0.892	0.977	0.822	0.804	0.969	0.895	0.857	0.907		0.971	1.042	0.985	1.042	0.921	0.933	0.946	0.931		0.913	0.959	0.931	0.946	0.852	0.9	1.026	0.918	0.979
	0.929	0.963	0.94	0.83	0.78	0.903	0.889	0.959	0.966	0.973	0.797	0.822	0.969	0.949	0.978	0.938		1.014	0.95	0.989	1.067	0.891	0.953	0.964	0.922		0.913	0.969	0.917	0.946	0.922	0.914	1.019	0.883	0.926
	0.897	0.928	0.958	0.903	0.81	0.9	0.858	0.957	0.848	0.961	0.8	0.798	0.886	0.912	0.931	0.922		1.011	0.933	1.006	1.033	0.928	0.978	0.915	0.897		0.903	0.986	0.937	0.962	0.908	0.979	0.956	0.882	0.919
	0.881	0.868	0.924	0.927	0.779	0.955	0.872	0.917	0.902	0.931	0.775	0.832	0.873	0.894	0.92	0.912		0.947	1.069	1.009	0.991	0.938	1.02	0.956	0.949		0.896	0.951	0.91	0.967	0.945	0.961	0.949	0.914	0.911
	0.906	0.981	0.964	0.897	0.863	0.916	0.879	0.914	0.942	0.956	0.836	0.872	0.853	0.847	0.898	0.806		0.986	1.033	0.984	1.015	0.922	0.996	0.918	0.927		0.865	0.893	0.912	0.915	0.946	0.989	0.917	0.916	0.825
	0.869	0.935	0.927	0.873	0.858	0.916	0.837	0.934	1.012	0.879	0.805	0.903	0.869	0.871	0.906	0.863		0.997	1.018	0.97	1.196	0.95	1.035	0.921	1.013		0.878	0.887	0.923	0.884	0.972	1	0.982	0.891	0.882
	0.899	0.961	0.889	0.838	0.88	0.881	0.813	1.009	0.996	0.909	0.809	0.873	0.92	0.927	0.953	0.89		0.972	0.998	0.963	1.032	0.946	1.066	0.929	0.971		0.821	0.86	0.897	0.938	0.945	0.934	0.965	0.86	0.874
	0.927	0.97	0.874	0.856	0.82	0.887	0.815	0.953	0.92	0.886	0.794	0.847	0.962	0.859	0.928	0.824		0.969	1.099	0.975	1.076	0.949	0.965	0.931	0.906		0.835	0.844	0.892	0.91	0.993	0.977	0.933	0.808	0.859
	0.927	0.918	0.917	0.878	0.831	0.894	0.839	0.936	0.923	0.885	0.803	0.844	0.899	0.843	0.841	0.834		0.977	0.999	1.013	1.052	0.931	0.95	0.949	0.893		0.829	0.917	0.852	0.949	1.005	0.913	0.893	0.845	0.827
	0.916	0.95	0.908	0.885	0.826	0.838	0.791	0.893	0.955	0.928	0.776	0.866	0.873	0.86	0.898	0.794		0.977	0.958	1.002	1.076	0.903	0.97	0.925	0.935		0.828	0.911	0.883	0.907	0.933	0.955	0.897	0.805	0.89
	0.95	0.891	0.897	0.869	0.807	0.883	0.809	0.9	0.969	0.908	0.773	0.914	0.861	0.83	0.956	0.845		0.976	1.017	1.028	1.041	0.944	0.928	0.962	0.883		0.827	0.922	0.816	0.942	0.975	0.996	0.864	0.798	0.927
	0.938	0.858	0.884	0.85	0.825	0.952	0.802	0.917	0.952	0.945	0.812	0.958	0.89	0.846	0.929	0.913		0.998	1.017	1.022	1.008	0.955	0.941	0.951	0.869		0.814	0.885	0.868	0.964	1.018	0.978	0.873	0.825	0.909
	0.935	0.809	0.821	0.831	0.842	0.916	0.795	0.941	0.927	0.989	0.85	0.943	0.945	0.872	0.939	0.913		0.998	0.973	0.996	1.095	0.939	0.979	0.921	0.913		0.795	0.94	0.915	0.907	0.925	0.978	0.892	0.803	0.871
	0.917	0.855	0.85	0.846	0.809	0.943	0.81	0.885	0.886	0.972	0.791	0.928	0.94	0.934	0.937	0.936		1.01	0.949	1.026	1.212	0.953	0.979	0.966	0.875		0.801	0.942	0.899	0.899	0.949	0.991	0.973	0.831	0.874
	0.88	0.928	0.815	0.84	0.806	0.965	0.8	0.901	0.884	0.957	0.817	0.925	0.923	0.952	0.992	0.936		0.992	0.933	0.981	0.986	0.949	1.009	0.994	0.879		0.794	0.965	0.909	0.906	0.971	0.994	0.92	0.918	0.937
	0.913	0.987	0.897	0.881	0.92	0.963	0.89	0.932	0.964	0.96	0.85	0.957	0.937	0.939	1.018	0.94		1.005	1.016	0.986	1.058	0.952	1.053	0.952	0.951		0.925	0.9	0.914	0.954	0.995	0.996	0.943	0.91	0.9
	0.92	0.981	0.877	0.891	0.933	0.966	0.845	0.893	0.923	0.977	0.856	0.95	0.901	0.948	0.972	0.955		1.01	1.017	1.023	1.143	0.944	1.001	0.951	0.883		0.914	0.956	0.892	0.941	0.963	1	0.93	0.874	0.878
	0.939	0.91	0.851	0.853	0.937	0.98	0.911	0.878	0.926	0.975	0.865	0.91	0.933	0.954	1.001	0.969		0.951	0.963	1.014	1.158	0.933	0.995	1.026	0.89		0.924	0.964	0.827	0.938	0.978	0.988	0.941	0.853	0.941
	0.962	1	0.839	0.857	0.894	0.988	0.924	0.912	0.979	1.046	0.871	0.956	0.967	0.947	0.968	0.967		1.002	0.927	1.013	1.067	0.926	1.015	0.959	0.882		0.88	0.927	0.803	0.96	0.97	0.967	0.887	0.872	0.957
	0.968	0.954	0.94	0.825	0.929	0.96	0.956	0.941	0.97	1.001	0.917	0.958	1.003	0.958	1.003	0.957		1.025	0.905	0.985	1.176	0.984	0.989	0.971	0.89		0.917	0.925	0.882	0.939	0.986	1.005	0.986	0.844	0.939
	0.969	0.978	0.907	0.789	0.939	0.989	0.945	0.93	0.939	1.01	0.866	0.932	0.952	0.97	1.006	0.979		1.008	0.964	1.04	1.041	1.004	0.955	0.978	0.864		0.919	0.965	0.86	0.944	0.955	0.983	1.058	0.891	0.944
	0.974	0.958	0.909	0.872	0.915	0.967	0.925	0.978	0.982	1.02	0.886	0.938	0.945	1.018	1.005	0.963		1.004	1.03	0.995	1.006	0.959	0.955	0.98	0.911		0.949	0.958	0.899	0.932	0.972	0.985	1.004	0.924	0.905
20h	0.958	0.983	0.976	0.889	0.96	0.972	0.896	0.927	0.987	0.99	0.909	0.948	0.936	1.001	1.019	0.972	20h	1.059	0.958	1.001	1.045	1.002	0.998	1.012	0.96	20h	0.96	0.964	0.938	0.961	0.971	0.983	1.016	0.952	0.913
	0.996	0.976	0.912	0.87	0.947	1.003	0.965	0.939	0.963	0.998	0.912	0.97	0.952	0.961	1.011	0.99		1.001	0.901	1.031	1.076	0.967	1.009	0.98	0.958		0.941	0.925	0.944	0.949	1.002	0.994	0.974	0.909	0.967
	0.916	0.964	0.911	0.88	0.935	0.994	0.985	0.947	0.975	0.998	0.958	0.948	0.929	0.976	1.018	0.954		0.976	1.012	1.02	1.027	0.961	0.993	0.942	0.964		0.98	0.96	0.921	0.959	1.001	1.037	0.894	0.96	0.951
	0.972	0.994	0.898	0.946	0.94	1.007	1.017	0.951	0.978	0.97	0.933	0.958	0.986	0.982	0.999	0.97		1.007	0.968	1.046	1.047	0.993	0.975	0.952	0.961		0.981	0.993	0.954	0.969	1.004	0.989	0.972	0.961	1.008
	0.963	0.981	0.937	0.941	0.96	0.993	0.971	0.969	0.98	0.978	0.93	0.973	0.953	0.965	0.957	0.94		0.998	0.925	1.015	1.02	0.961	1.008	0.945	0.961		0.974	0.92	0.963	0.964	1.022	0.975	0.988	0.948	0.959
	0.936	1.006	0.936	0.935	0.909	0.989	0.955	0.968	0.976	0.969	0.897	0.971	0.981	0.944	1.005	0.931		1.002	0.968	1.026	1.047	0.967	1.013	0.951	0.976		0.948	0.947	0.963	0.974	1.017	1	1.021	0.96	0.99
	0.989	0.997	1.001	0.935	0.943	0.986	0.983	0.962	1.025	0.97	0.904	0.951	0.961	0.936	0.999	0.969		1.003	0.967	1.012	1.067	1.029	1.032	0.999	0.983		0.99	0.966	0.962	0.984	1.031	1.027	1.029	0.964	0.993
	0.986	0.979	0.971	0.929	0.943	1.008	0.961	0.992	0.975	0.977	0.934	0.983	0.97	0.978	0.989	0.968		0.999	0.994	1.013	1.037	1.014	1.028	0.99	0.961		0.992	0.928	0.964	0.985	1.038	0.977	1.055	0.992	0.985
	0.958	0.967	1.012	0.931	0.969	1.003	0.962	0.981	0.973	0.974	0.949	0.976	0.979	0.946	0.948	0.965		1.017	0.906	1.003	1.107	0.983	1.016	0.982	1.001		0.983	0.995	0.982	0.968	1.03	1.014	1.013	0.958	0.972
	0.969	0.971	1.015	0.95	0.963	0.968	0.971	0.993	1.023	0.987	0.934	1.003	1	0.935	1.002	0.945		1.024	0.974	1.057	1.043	0.999	0.992	0.968	1.014		0.97	0.965	0.987	0.971	0.98	0.992	1.048	0.983	0.965
	0.989	1.037	0.98	0.931	0.932	0.971	1.006	1.003	1.025	0.989	0.929	0.991	0.984	0.99	0.991	0.966		1	0.965	1.079	1.061	1.006	1.056	0.986	1.03		0.968	1.02	0.973	0.964	0.998	1.03	1.024	0.951	0.974
	0.991	1.019	0.999	0.937	0.97	0.94	0.99	0.989	0.971	0.982	0.96	0.964	0.989	0.973	0.988	0.963		0.983	0.982	1.05	1.112	1.006	1.005	0.982	0.977		0.978	0.997	1.01	0.978	1.016	1.013	1.028	0.957	0.996
	0.975	1.011	0.991	0.933	0.974	0.95	0.986	1.004	0.981	0.955	0.949	0.977	1.028	0.985	0.996	0.995		0.987	1.013	1.013	1.07	0.995	1.042	1.009	0.993		0.958	1.01	1.011	0.993	1.037	0.986	1.04	0.958	1.015
	0.98	0.997	1.014	0.95	0.969	0.997	0.949	0.998	0.954	1.003	0.96	0.972	0.965	0.94	1.009	0.983		1.051	0.986	1.018	1.11	1.003	1.056	0.984	0.968		0.96	0.989	0.991	1.003	1.028	1.014	1.048	0.966	1
	0.973	1.004	0.99	0.941	0.961	0.977	1.005	1.002	0.971	0.976	0.948	0.997	0.952	0.955	1.003	0.972		0.966	0.931	1.059	1.093	0.974	1.031	1.004	0.989		0.965	0.959	0.972	0.986	1.001	1.01	1.029	0.999	0.99
	0.981	1.008	1.009	0.96	0.978	0.982	0.951	1.012	0.981	1.008	0.975	0.99	0.965	0.966	0.99	0.973		0.996	0.977	1.035	1.094	1.001	1.033	1.011	0.986		1.008	0.985	1.006	0.971	1.032	1.011	1.036	0.988	0.982
	0.994	1.001	0.993	0.947	0.968	0.97	0.968	0.992	1.018	0.998	0.952	0.976	0.978	0.985	1.02	0.981		1.017	0.974	1.055	1.087	1.017	1.055	1.047	0.977		1.007	0.967	0.99	0.959	1.004	1.024	1.048	0.95	1.007
	0.969	0.985	0.989	0.956	0.956	0.991	0.997	0.982	0.976	0.987	0.984	0.969	0.976	0.962	0.994	0.975		0.977	1.012	0.993	1.042	1.022	1.018	1.009	1.116		0.984	0.992	0.987	1.017	1.005	0.991	1.036	0.949	1.021
	0.986	0.988	1.017	0.93	0.98	0.976	0.98	1.021	0.996	0.988	0.971	0.955	0.985	0.982	0.995	0.957		1.007	1.04	0.998	1.133	1.045	1.044	0.992	1.051		0.988	1.012	1.004	0.983	1.016	1.002	1.028	0.953	0.993
	0.992	0.984	0.999	0.944	0.984	0.954	0.985	1.026	0.983	0.959	0.954	0.962	0.967	0.959	0.994	0.995		0.985	1.01	0.992	1.125	0.985	1.063	1.011	1.038		0.956	0.988	1	0.987	1.016	1.006	1.043	0.948	1.024
	0.985	0.925	0.979	0.958	0.99	0.97	0.986	1.016	0.975	0.977	0.968	1.018	0.966	0.963	0.968	0.967		0.985	1.037	1.003	1.136	1.019	1.074	1.052	1.103		0.988	0.989	1.021	0.938	0.993	1.051	1.071	0.954	0.988
	0.963	0.918	0.975	0.947	0.976	0.986	0.988	0.989	0.962	0.991	0.95	1.002	0.931	0.96	0.99	0.947		0.933	1.068	1.055	1.103	0.989	1.037	1.052	1.043		0.978	1.009	1	0.971	0.991	0.993	1.038	0.973	0.998
	0.958	0.919	1.009	0.913	0.992	0.959	1.003	1.007	0.975	0.98	0.992	0.995	0.98	0.953	0.993	0.958		0.98	0.955	1.043	1.121	0.933	1.016	1.048	1.107		0.991	1.006	1.003	0.952	0.941	1.025	1.06	0.953	0.997
	0.978	0.892	1.006	0.924	0.987	0.988	0.987	0.992	0.999	0.957	0.962	0.999	0.984	0.968	0.971	0.932		0.955	0.96	1.007	1.09	0.991	0.995	1.029	1.017		0.981	0.981	1.01	0.947	0.98	1.013	1	0.936	1.012
	0.941	0.803	0.989	0.908	0.99	0.927	0.961	0.987	0.972	0.994	0.961	0.95	0.953	0.979	0.988	0.993		0.943	0.989	0.988	1.023	0.986	1.015	1.049	1.009		0.962	0.986	0.977	0.91	0.922	1.042	1.001	0.938	0.999
	0.962	0.855	0.996	0.859	0.969	0.937	0.961	1.007	0.958	0.963	0.947	0.925	0.94	0.992	0.964	0.917		1.004	0.983	1.028	1.125	0.968	0.956	0.991	0.996		0.986	0.974	0.979	0.899	0.923	0.985	0.982	0.915	0.965
	0.97	0.835	0.97	0.899	0.955	0.923	0.977	0.988	0.97	0.976	0.94	0.948	0.944	0.977	0.966	0.931		0.99	1.005	1.062	1.065	0.913	0.943	1.032	0.965		0.971	1.017	0.997	0.861	0.904	1.002	1.008	0.911	0.962
	0.938	0.807	0.982	0.921	0.963	0.955	1.001	1.013	0.98	0.962	0.934	0.921	0.961	0.986	0.964	0.881		0.958	1.064	1.056	1.062	0.933	0.98	1.01	0.971		0.96	0.981	0.963	0.848	0.922	0.998	1.019	0.903	0.976
	0.941	0.895	0.893	0.903	0.962	0.982	0.995	1.033	0.985	1.015	0.948	0.923	0.932	0.956	0.99	0.966		0.979	1.043	0.988	1.078	0.963	1.011	1.002	0.946		0.954	0.99	0.943	0.84	0.889	0.993	0.986	0.871	0.892
	0.934	0.87	0.928	0.875	0.969	0.98	1.028	0.958	0.961	0.982	0.968	0.889	0.952	0.973	0.954	0.921		0.946	1.042	0.975	1.1	0.938	0.978	0.991	0.964		0.96	0.937	0.99	0.823	0.881	0.976	1.055	0.888	0.9
	0.942	0.931	0.897	0.918	0.943	0.982	0.939	0.977	0.93	0.976	0.928	0.873	0.917	0.971	0.929	0.946		0.924	1.035	1.013	1.089	0.92	1.038	0.984	0.954		0.97	0.913	0.983	0.82	0.932	0.955	0.997	0.838	0.918
	0.95	0.896	0.902	0.912	0.912	0.907	0.989	0.962	0.981	0.961	0.934	0.854	0.914	0.979	0.966	0.949		0.96	0.921	1.065	1.058	0.966	0.99	0.982	1.05		0.932	0.906	0.973	0.807	0.928	0.965	1.037	0.833	0.966
	0.899	0.955	0.878	0.943	0.944	0.876	0.942	0.994	0.955	0.93	0.958	0.887	0.873	0.978	0.939	0.954		0.956	0.983	1.019	0.969	0.992	1.008	0.974	1.014		0.93	0.859	0.966	0.859	0.967	0.938	1.04	0.906	0.927
	0.889	0.956	0.838	0.947	0.994	0.901	0.965	0.957	0.982	0.853	0.979	0.906	0.867	0.966	0.922	0.992		0.953	0.977	1.032	1.027	1.011	0.994	0.968	0.995		0.936	0.88	0.953	0.882	0.963	0.925	1.019	0.918	0.949
	0.936	0.953	0.854	0.947	0.956	0.845	0.93	0.936	0.968	0.854	0.956	0.887	0.917	0.963	0.987	0.971		0.983	0.967	0.963	1.04	0.969	1.023	0.988	0.992		0.889	0.82	0.969	0.877	0.93	0.924	1.034	0.914	0.951
	0.948	0.965	0.903	0.96	0.95	0.843	0.979	0.929	0.929	0.876	0.935	0.928	0.875	0.984	0.953	0.948		0.988	0.948	0.967	1.11	0.994	1.045	0.993	0.972		0.958	0.859	0.952	0.84	0.939	0.996	1.009	0.946	0.963
	0.93	0.937	0.937	0.954	0.975	0.89	0.971	0.908	0.945	0.915	0.904	0.944	0.909	0.995	0.968	0.975		1.002	0.977	0.972	1.165	0.991	0.984	1.033	0.981		0.985	0.848	0.957	0.865	0.977	0.953	1.032	0.934	0.977
	0.975	0.986	0.892	0.951	0.952	0.883	0.959	0.925	0.955	0.906	0.975	0.944	0.919	0.957	0.95	0.972		1.004	1.016	1.022	0.983	1.001	1.035	1.04	0.97		0.944	0.912	0.969	0.843	0.913	0.989	1.049	0.938	0.974
	0.961	0.98	0.96	0.97	0.989	0.854	0.969	0.946	0.963	0.975	0.95	0.954	0.899	0.954	0.961	0.979		0.976	0.998	1.022	1.008	0.981	1.038	1.029	0.996		0.984	0.901	0.984	0.909	0.904	1.021	1.008	0.951	0.97
	0.939	0.992	0.972	0.963	0.962	0.836	0.986	0.953	0.995	0.958	0.938	0.92	0.911	0.942	0.923	0.955		0.986	1.02	0.982	1.062	0.998	1.076	1.061	1.022		0.95	0.809	0.993	0.892	0.901	1.013	1.013	0.945	0.974
8h	0.917	0.986	0.961	0.966	0.97	0.824	1.001	0.929	0.957	0.956	0.954	0.887	0.931	0.983	0.9	0.955	8h	0.968	0.992	1.022	1.111	0.982	1.048	1.013	1.164	8h	0.948	0.952	0.989	0.839	0.855	1.015	1.04	0.936	0.994
	0.917	0.987	0.961	0.915	0.939	0.817	0.964	0.932	0.966	0.936	0.925	0.897	0.92	0.958	0.867	0.975		0.968	1.024	0.985	1.029	1.028	0.996	1.055	1.165		0.976	0.948	0.951	0.874	0.856	1.019	1.068	0.955	0.981
	0.931	0.93	0.981	0.981	0.963	0.764	0.921	0.979	0.938	0.967	0.932	0.889	0.931	0.962	0.933	0.955		0.977	1.026	0.965	1.078	0.986	1.227	1.036	0.969		0.97	0.974	0.984	0.82	0.785	0.982	1.04	0.953	0.946
	0.902	0.953	0.97	0.936	0.933	0.876	0.964	1.006	0.97	0.954	0.938	0.881	0.945	0.926	0.914	0.955		0.981	0.991	0.999	1.1	1.007	1.194	1.032	0.988		0.96	0.955	0.979	0.812	0.798	0.996	0.993	0.945	0.907
	0.905	0.896	1.014	0.903	0.921	0.766	0.919	0.943	0.94	0.943	0.922	0.856	0.922	0.955	0.926	0.911		0.997	0.985	1.002	1.077	1.007	1.121	1.019	1.024		0.974	0.978	1.002	0.791	0.789	0.982	1.015	0.922	0.879
	0.918	0.869	0.986	0.902	0.942	0.783	0.921	0.938	0.969	0.971	0.945	0.846	0.905	0.969	0.87	0.939		0.943	1.146	0.972	1.091	0.953	1.02	1.003	1.041		0.993	0.991	0.986	0.803	0.785	1.02	1.05	0.934	0.852
	0.91	0.816	0.932	0.897	0.896	0.773	0.917	0.959	0.968	0.989	0.85	0.813	0.938	0.921	0.901	0.961		0.978	1.065	0.983	1.059	0.96	0.979	1.042	1.071		0.947	1.005	0.964	0.808	0.78	0.997	1.032	0.991	0.872
	0.918	0.862	0.916	0.908	0.883	0.771	0.898	0.94	0.962	0.951	0.886	0.851	0.941	0.945	0.928	0.971		0.977	0.999	0.962	0.92	0.955	1.045	1.047	0.983		0.963	1.014	0.982	0.774	0.757	0.986	0.982	0.937	0.88
	0.903	0.84	0.851	0.89	0.904	0.804	0.868	0.966	0.939	0.945	0.902	0.848	0.948	0.951	0.891	0.89		1.031	1.053	0.875	0.936	1.006	1.019	1.015	1.162		0.941	0.983	0.992	0.805	0.782	0.992	0.974	0.92	0.909
	0.884	0.902	0.982	0.869	0.935	0.73	0.85	0.974	0.969	0.988	0.846	0.864	0.912	0.981	0.844	0.933		0.993	0.933	0.859	1.053	0.963	0.957	1.009	1.014		0.95	0.982	1.017	0.758	0.777	0.977	1.007	0.901	0.925
	0.838	0.899	0.963	0.856	0.898	0.757	0.847	0.899	1.032	0.99	0.886	0.845	0.943	0.939	0.927	0.921		0.987	1.034	0.911	1.019	0.974	1.018	0.99	1.051		0.91	0.989	0.924	0.778	0.783	0.995	1.031	0.873	0.939
	0.836	0.914	0.96	0.833	0.834	0.81	0.838	0.894	0.921	0.959	0.867	0.813	0.964	0.926	0.919	0.863		1.019	1.022	0.828	1.059	0.856	0.963	0.974	0.995		0.958	0.875	0.965	0.815	0.857	0.894	1.004	0.854	0.962
	0.857	0.903	0.908	0.84	0.829	0.922	0.897	0.945	0.946	0.992	0.828	0.86	0.944	0.865	0.916	0.909		0.992	1	0.878	1.025	0.909	0.984	0.952	0.932		0.952	0.981	0.959	0.916	0.921	0.943	0.996	0.868	0.868
	0.826	0.898	0.895	0.833	0.849	0.92	0.958	0.957	0.925	0.943	0.893	0.858	0.951	0.852	0.848	0.882		0.98	0.984	0.888	1.026	0.974	0.975	0.988	0.938		0.96	0.981	0.951	0.907	0.964	0.909	1.024	0.835	0.867
	0.813	0.879	0.908	0.85	0.846	0.917	0.913	0.947	0.868	0.94	0.822	0.891	0.92	0.839	0.86	0.909		0.977	0.965	0.88	1.011	0.984	0.971	0.97	0.991		0.976	0.955	0.965	0.953	0.977	0.944	1.048	0.814	0.911
	0.832	0.847	0.875	0.803	0.817	0.931	0.933	0.934	0.938	0.994	0.84	0.847	0.915	0.921	0.873	0.896		0.969	0.978	0.974	0.933	0.981	0.915	0.941	1.063		0.945	0.942	0.894	0.935	0.981	0.926	0.983	0.795	0.965
	0.877	0.865	0.876	0.846	0.822	0.906	0.85	0.92	0.91	0.988	0.862	0.862	0.95	0.905	0.876	0.934		0.985	0.946	0.979	0.895	0.95	0.874	0.968	1.012		0.867	0.879	0.892	0.907	0.976	0.894	1	0.79	0.918
	0.903	0.874	0.87	0.847	0.821	0.945	0.843	0.918	0.952	0.963	0.937	0.846	0.95	0.875	0.891	0.943		0.974	0.936	0.964	0.938	0.942	0.962	0.952	1.009		0.902	0.901	0.948	0.953	0.955	0.856	0.924	0.851	0.936
	0.909	0.954	0.898	0.828	0.807	0.963	0.818	0.93	0.913	0.977	0.878	0.825	0.957	0.917	0.88	0.93		0.98	0.9	0.927	0.941	0.958	0.994	1	0.992		0.872	0.891	0.901	0.974	1.041	0.881	0.943	0.875	0.937
	0.9	0.945	0.905	0.832	0.817	0.951	0.818	0.931	0.941	0.955	0.905	0.806	0.885	0.905	0.846	0.916		0.972	0.953	0.902	1.025	0.986	0.982	0.935	1.04		0.876	0.902	0.922	0.959	1.022	0.847	0.958	0.873	0.955
	0.845	0.914	0.906	0.79	0.819	0.94	0.817	0.938	0.958	0.925	0.856	0.852	0.91	0.855	0.84	0.883		0.942	0.964	0.975	1.011	0.961	0.987	0.95	1.012		0.9	0.834	0.928	0.934	0.983	0.849	0.985	0.852	0.935
	0.826	0.923	0.89	0.847	0.793	0.966	0.84	0.96	0.988	0.933	0.897	0.866	0.988	0.841	0.829	0.869		1.008	0.98	0.961	0.943	0.983	0.965	0.978	0.991		0.876	0.838	0.846	0.922	0.999	0.817	0.908	0.86	0.926
	0.882	0.903	0.922	0.797	0.834	0.952	0.842	0.933	0.994	0.942	0.896	0.872	0.955	0.902	0.855	0.931		0.987	0.963	0.973	0.962	0.98	0.95	1.009	1.013		0.871	0.895	0.902	0.977	1.028	0.875	0.95	0.856	0.945
	0.807	0.879	0.868	0.874	0.772	0.967	0.803	0.892	0.972	0.933	0.91	0.857	0.965	0.96	0.805	0.932		0.95	0.973	0.978	0.88	0.94	0.96	1.003	0.909		0.831	0.863	0.817	0.944	1.001	0.975	1.024	0.836	0.913
	0.771	0.838	0.905	0.806	0.884	0.991	0.814	0.976	0.986	0.928	0.9	0.837	0.981	0.894	0.861	0.87		0.969	0.988	0.948	0.942	0.916	0.881	0.955	0.935		0.862	0.941	0.871	0.954	1.021	1.014	1.014	0.858	0.845
	0.809	0.858	0.865	0.814	0.855	0.939	0.825	0.972	1.029	0.908	0.873	0.831	0.986	0.867	0.891	0.859		1.001	0.983	0.922	0.913	0.946	0.945	0.994	0.992		0.932	0.909	0.91	0.932	0.989	1.006	1	0.84	0.868
	0.82	0.821	0.817	0.799	0.888	0.986	0.812	0.984	1.026	0.889	0.924	0.879	0.948	0.846	0.837	0.831		0.955	0.99	0.925	0.891	0.933	1.015	0.944	1.08		0.943	0.882	0.942	0.907	0.994	0.978	0.926	0.848	0.847
	0.835	0.822	0.871	0.778	0.894	0.971	0.834	0.991	0.994	0.87	0.896	0.836	0.996	0.887	0.831	0.905		0.952	0.949	0.943	0.939	0.948	1.02	0.971	1.146		0.944	0.894	0.925	0.904	1.027	0.965	0.995	0.823	0.866
	0.899	0.921	0.831	0.827	0.825	0.954	0.822	0.978	1.059	0.917	0.91	0.81	1.002	0.93	0.842	0.926		0.98	1.042	0.96	0.926	0.978	1.013	0.978	1.018		0.843	0.879	0.852	0.896	1.008	0.977	0.929	0.842	0.863
	0.872	0.921	0.887	0.782	0.822	0.995	0.866	0.998	1.039	0.944	0.908	0.827	1.03	0.941	0.987	0.904		0.979	1.019	1.022	0.928	0.985	0.995	1.041	0.996		0.886	0.871	0.865	0.858	1.043	0.979	0.996	0.871	0.888
	0.907	0.945	0.895	0.858	0.807	0.992	0.838	0.993	1.018	0.935	0.942	0.834	0.97	0.906	0.934	0.925		1.002	0.978	1.024	0.912	0.964	0.937	1.056	1.144		0.845	0.868	0.861	0.902	1.005	0.96	1.003	0.888	0.971
	0.869	0.907	0.911	0.843	0.846	0.981	0.834	0.969	0.989	0.949	0.926	0.812	0.978	0.9	0.913	0.953		1.033	0.949	0.998	0.948	0.949	0.98	1.033	1.091		0.887	0.872	0.897	0.973	1.011	0.934	1.009	0.902	0.961
	0.895	0.917	0.873	0.863	0.869	1.001	0.829	0.948	0.951	0.942	0.938	0.829	0.965	0.963	0.892	0.951		0.96	0.974	0.955	1.026	0.951	0.931	0.998	0.918		0.949	0.884	0.932	0.949	1.041	0.987	0.941	0.858	0.89
	0.957	0.96	0.85	0.82	0.911	1.019	0.857	0.97	1.002	0.974	0.952	0.905	1.019	0.985	0.96	0.981		0.986	0.962	0.97	1.046	0.932	0.944	1.002	1.006		0.976	0.954	0.921	0.973	1.029	0.982	1.029	0.844	0.925
	0.94	0.919	0.876	0.831	0.887	0.982	0.934	0.964	1.005	0.953	0.943	0.897	0.945	0.944	0.989	0.95		1.012	0.97	0.989	1.071	0.912	0.922	1.026	0.938		0.962	0.929	0.946	0.936	1.047	0.994	1.045	0.86	0.941
	0.94	0.942	0.935	0.834	0.835	0.983	0.911	0.987	1.012	0.946	0.933	0.901	0.963	0.938	0.987	0.941		0.974	0.951	0.953	1.066	0.925	1.005	1.048	1.129		0.988	0.927	0.971	0.903	1.015	1.014	1	0.864	0.914
	0.962	0.948	0.916	0.778	0.842	1.005	0.917	1.008	0.996	0.991	0.945	0.933	0.998	0.92	0.949	0.98		1.001	0.914	1.035	1.08	0.987	1.033	1.029	1.153		0.972	0.917	1.035	0.935	0.992	0.965	0.955	0.892	0.963
	0.919	0.875	0.849	0.933	0.834	0.986	0.893	0.997	1.01	0.981	0.939	0.927	1.008	1.012	0.986	0.971		1.012	1.087	1.02	1.049	0.976	1.03	0.964	0.965		0.875	0.827	0.932	0.917	1.027	0.967	0.961	0.913	0.995
	0.982	0.875	0.89	0.924	0.942	1.014	0.865	0.982	1.015	0.994	0.943	0.918	1.009	0.986	0.947	0.941		1.021	1.085	0.981	1.03	0.933	1.047	0.95	0.999		0.988	0.967	0.952	0.936	1.016	0.998	1.011	0.921	0.974
	0.963	0.975	0.866	0.932	0.965	1.012	0.853	0.959	1.017	1	0.92	0.938	0.995	0.967	0.991	0.965		0.973	0.951	0.961	1.053	0.962	0.991	1.022	1.056		0.967	0.99	0.947	0.926	1.02	0.99	1.016	0.867	0.988
20h	0.986	0.939	0.848	0.913	0.92	1.012	0.855	0.957	0.993	1.014	0.944	0.938	0.998	0.958	0.954	0.996	20h	0.983	0.972	0.97	1.065	0.992	0.956	0.989	0.965	20h	0.96	0.978	0.971	0.972	1.027	1.009	1.006	0.879	0.983
	0.99	0.959	0.851	0.891	0.974	1.006	0.969	0.967	0.995	0.996	0.919	0.958	0.996	0.983	0.97	1.037		1.008	0.947	0.949	1.065	0.981	1.024	1.01	1.024		0.955	0.927	0.959	0.972	1.023	1.005	0.967	0.915	1.04
	0.965	0.967	0.943	0.943	0.958	0.999	0.976	0.95	0.996	0.973	0.91	0.964	0.983	0.981	0.969	0.951		0.995	0.991	0.995	1.058	1.001	1.156	0.992	1.044		0.95	0.929	0.934	0.941	1.024	1.02	1.01	0.927	1.018
	0.96	0.944	0.962	0.922	0.973	0.992	0.947	0.951	1.035	0.968	0.933	0.927	0.997	0.967	0.969	0.895		0.998	0.995	0.987	1.02	0.945	0.982	0.995	1.084		0.993	0.962	0.984	0.954	0.999	0.983	1.007	0.931	0.996
	0.947	0.992	0.981	0.929	0.961	0.992	0.941	0.977	1.024	0.961	0.915	0.943	0.987	0.975	0.973	0.939		0.975	1.002	0.959	1.069	1	1.007	1.001	1.034		0.978	0.969	0.967	0.983	1.032	1.002	1.016	0.944	0.961
	0.958	0.99	0.993	0.907	0.97	1.002	1.009	0.973	1.006	0.972	0.941	0.95	0.991	0.965	0.971	0.95		0.98	0.997	0.966	1.072	1	1.027	0.987	1.006		1.015	0.982	1.014	0.986	1.044	1.029	1.019	0.952	0.989
	0.959	0.993	0.973	0.956	0.949	0.991	0.935	0.975	0.983	0.976	0.916	0.964	1.013	0.982	0.979	0.948		0.98	1.006	0.959	1.017	0.987	1.036	1.007	1.024		1.026	1.015	0.984	0.966	1.024	0.99	1.032	0.939	1.004
	0.942	0.974	0.99	0.942	0.987	0.99	1.009	0.998	1.048	0.993	0.928	0.965	1.037	0.959	0.967	0.964		0.982	0.987	1.008	1.071	0.998	0.972	1.021	1.055		0.976	0.981	1.007	0.978	1.034	1.012	1.025	0.934	1.004
	0.942	0.962	0.981	0.945	0.986	1.001	0.987	1.004	0.991	0.979	0.914	0.965	0.992	0.939	0.974	0.971		0.995	0.963	0.95	1.06	1.008	0.965	1.047	0.956		1.021	1.008	0.98	0.961	1.038	1.003	1.064	0.932	0.991
	0.963	0.962	1.018	0.939	0.958	1.004	0.995	0.98	1.055	0.988	0.952	0.962	0.987	0.955	0.974	0.924		0.969	0.962	1.017	1.049	1.008	0.997	1.011	1.086		1.008	0.984	0.988	0.987	1.03	1.045	0.996	0.945	0.994
	0.983	0.999	1.037	0.928	0.978	0.987	0.887	0.968	1.039	0.998	0.952	0.932	1.036	0.982	0.968	0.996		1.002	0.983	0.983	1.035	1.029	1.024	1.05	0.968		1.007	0.996	0.965	1.014	1.033	1.026	1.039	0.958	0.997
	0.967	0.999	1.036	0.929	1.012	1.045	0.988	0.967	1.049	0.98	0.946	0.985	1.029	0.961	0.987	0.977		0.996	1.001	1.039	1.047	1.014	1.021	1.031	0.992		1.024	1.015	0.976	0.975	1.03	1.012	1.071	0.958	1.029
	0.972	1.003	0.99	0.964	0.979	0.997	0.971	0.99	1.074	1.012	0.925	0.995	1	0.947	0.99	1.003		0.975	1.014	1.017	1.037	1.002	1.024	1.039	0.977		1	1.011	0.998	1.041	1.023	1.052	1.048	0.974	1.013
	0.97	0.995	1.032	0.944	0.988	0.996	0.998	0.977	1.038	0.989	0.944	0.952	0.964	0.936	0.979	1.005		0.997	1.022	0.991	1.124	1.009	1.01	1.14	0.996		0.983	1.005	1.032	0.999	1.024	1.016	1.049	0.983	1.028
	1	1.009	0.959	0.943	0.968	1.044	1.009	0.996	1.005	0.949	0.952	0.977	0.96	0.995	0.97	0.967		1.015	1.025	0.99	1.098	1.001	1.044	1.036	0.998		0.998	1.016	1	0.971	1.021	1.031	1.043	0.973	1.009
	0.968	1.014	0.982	0.938	0.952	1.017	0.955	0.973	1.049	0.943	0.942	0.948	0.973	0.952	0.962	0.986		0.979	1.022	0.964	1.028	0.993	0.981	1.061	1.009		1.026	1.019	0.989	0.982	1.016	1.017	1.038	0.969	1.007
	0.982	0.974	0.994	0.949	0.987	1.022	1.017	1.001	1.032	0.952	0.956	0.962	0.991	0.983	1.023	0.982		1.011	1.011	0.95	1.037	1.016	0.998	1.073	1.011		1.006	0.986	0.978	0.99	1.031	1.026	1.058	0.991	1.035
	0.959	1	0.97	0.963	0.979	1.005	0.973	0.989	1.043	0.945	0.957	0.964	0.984	0.954	0.962	0.975		1.016	1.044	1.126	1.084	0.988	1.059	1.047	1.111		0.998	0.996	0.996	0.99	1.005	1.032	1.08	0.98	1.013
	0.959	0.996	1.022	0.936	0.99	0.999	1.025	1.001	1.073	0.946	0.94	0.982	0.989	0.963	0.978	0.974		0.987	0.972	0.969	1.092	1.021	1.049	1.091	1.12		1.023	1.059	1.053	1.011	1.053	1.024	1.027	0.97	0.991
	0.967	0.995	1.038	0.931	0.963	0.98	0.993	0.987	0.999	0.969	0.923	0.922	0.991	0.972	0.976	0.991		0.972	0.997	0.964	1.072	1.009	1.022	1.027	1.12		1.015	1.008	1.028	0.982	1.015	1.045	1.048	0.955	1.022
	0.973	0.99	1.034	0.865	0.969	0.928	0.993	0.97	1.045	0.938	0.924	0.969	0.971	0.965	0.996	0.979		0.97	0.999	0.991	1.041	1.005	0.988	1.04	1.065		0.976	1.023	1.009	0.996	1.022	1.036	1.043	0.962	1.029
	0.979	0.987	1	0.903	0.977	0.954	1.016	1.003	1.035	0.959	0.956	0.971	0.97	0.996	0.969	0.976		0.968	1.023	1.012	1.015	1.007	0.995	1.073	1.014		0.975	1.008	0.962	0.985	1.022	1.054	1.039	0.976	1.006
	0.967	1.012	0.98	0.898	0.961	0.948	1.008	0.99	1.056	0.958	0.945	0.951	0.99	0.975	0.969	0.954		0.999	1.002	1.024	1.056	1.017	0.988	1.096	1.072		1	1.039	0.978	0.987	0.996	1.037	1.041	0.94	0.988
	0.957	0.98	0.97	0.886	0.979	0.917	1.007	0.986	1.064	0.97	0.96	0.956	0.984	0.975	1.02	0.954		0.993	1.016	0.99	1.068	0.982	0.928	1.057	0.944		0.974	0.982	0.96	0.995	1.024	0.987	1.014	0.943	0.983
	0.966	0.925	0.948	0.837	0.964	0.89	1.04	0.984	1.069	0.961	0.904	0.947	1.022	0.989	1.013	0.993		0.977	1.006	0.97	0.996	0.974	0.937	1.078	1.047		1.02	1.001	1.01	1.013	0.99	1.011	1.035	0.923	1.044
	0.939	0.92	0.945	0.873	0.931	0.868	0.974	1.039	1.09	0.93	0.957	0.962	0.975	0.95	0.989	0.942		0.983	0.969	0.925	0.974	0.915	1.007	1.088	1.033		0.913	0.96	0.972	0.975	0.93	0.995	0.996	0.934	0.98
	0.977	0.921	0.98	0.811	0.948	0.894	1.005	1.004	1.001	0.909	0.933	0.906	0.943	0.918	0.963	0.936		1.009	0.976	0.994	1.013	0.972	0.996	1.055	0.997		0.914	0.916	0.903	0.96	0.975	1.026	1.018	0.913	0.886
	0.953	0.865	0.928	0.848	0.934	0.848	0.936	0.981	1.079	0.85	0.911	0.893	1.011	0.949	1.004	0.943		0.961	0.963	0.963	1.029	0.954	0.96	1.011	0.971		0.896	0.909	0.913	0.898	0.886	0.987	0.999	0.862	0.927
	0.953	0.893	0.919	0.814	0.921	0.825	0.958	0.996	1.066	0.807	0.904	0.897	0.991	0.961	1.016	0.926		1.018	0.968	1.015	1.032	0.984	0.99	1.093	0.931		0.888	0.905	0.888	0.898	0.888	0.971	0.995	0.861	0.913
	0.963	0.954	0.956	0.874	0.868	0.826	0.954	1.008	1.041	0.883	0.925	0.936	0.969	0.956	0.964	0.89		0.997	0.998	1.004	1.031	0.94	0.996	1.067	0.939		0.892	0.899	0.89	0.89	0.869	1.001	1.012	0.848	0.875
	0.949	0.941	0.935	0.85	0.886	0.852	0.993	1.008	1.057	0.853	0.916	0.894	0.937	0.955	0.979	0.88		0.982	0.981	0.961	0.999	0.928	0.916	1.09	0.965		0.848	0.883	0.917	0.976	0.864	0.967	0.969	0.844	0.836
	0.922	0.962	0.91	0.842	0.867	0.82	1	0.986	1.015	0.866	0.974	0.898	0.859	0.964	0.98	0.968		0.961	0.936	0.921	1.004	0.972	0.962	0.972	0.946		0.826	0.835	0.851	0.951	0.884	0.895	1.02	0.813	0.84
	0.949	0.989	0.911	0.835	0.877	0.804	0.977	0.963	1.023	0.873	0.928	0.897	0.964	0.995	1.074	0.988		1.005	0.925	0.975	1.012	0.988	0.977	1.02	0.937		0.892	0.864	0.88	0.944	0.855	0.908	1.081	0.812	0.908
	0.93	0.982	0.963	0.877	0.915	0.801	0.996	0.975	1.056	0.945	0.937	0.918	0.95	0.929	0.988	0.955		0.955	0.988	0.925	0.947	1.001	0.998	1.026	0.95		0.935	0.837	0.854	0.985	0.849	0.923	0.989	0.934	0.906
	0.946	0.982	0.948	0.917	0.887	0.805	0.999	1.013	1.051	0.942	0.97	0.916	0.99	0.947	0.998	0.958		0.964	0.959	0.942	0.952	0.985	0.986	1.007	0.962		0.979	0.823	0.903	0.934	0.914	0.87	1.029	0.938	0.978
	0.941	0.969	0.969	0.936	0.846	0.793	0.99	1.031	0.936	0.953	0.943	0.913	0.967	0.997	0.989	0.963		0.996	0.931	0.973	0.96	0.986	0.953	1.033	0.98		0.934	0.861	0.82	0.895	0.896	0.854	0.977	0.946	0.961
	0.973	0.974	0.98	0.952	0.872	0.809	1.021	1.003	0.98	0.899	0.954	0.9	0.966	0.993	0.984	0.965		0.981	0.912	0.971	1.021	1.004	1.026	1.048	1.026		0.925	0.895	0.897	0.836	0.881	0.991	1.043	0.934	0.902
	0.957	0.962	1.039	0.912	0.934	0.84	1.018	1.03	0.936	0.972	0.912	0.937	0.978	0.979	0.962	0.96		1.011	0.952	0.963	0.992	0.992	0.969	1.034	1.14		0.956	0.888	0.841	0.932	0.864	0.992	1.03	0.963	0.945
	0.957	0.964	0.969	0.948	0.926	0.835	0.987	0.997	0.94	0.955	0.924	0.916	0.996	0.948	0.974	0.982		0.985	0.95	0.947	1.048	1.001	1.072	1.031	1.067		0.989	0.845	0.884	0.944	0.878	0.96	1	0.976	0.977
	0.928	0.986	0.989	0.929	0.939	0.807	1.014	0.999	1.013	0.916	0.915	0.898	0.969	0.937	0.971	1.009		0.971	1.011	0.981	1.065	1.025	0.961	1.169	1.004		0.982	0.919	0.891	0.926	0.854	1.01	1.031	0.978	0.98
8h	0.954	0.972				0.792	0.993	1.028	0.983	0.936	0.881	0.868	0.999	0.916	0.922	0.963	8h	1.014		1.002		1.025	1.027	1.022	0.966	8h		0.947	0.905	0.939	0.85	0.93	1.016	0.965	0.968
	0.96	0.976				0.774	1	1.059	1.029	0.974	0.968	0.882						0.99		1.113		1.05	1.004		1.017					0.934	0.837	1.003		0.979
	0.925	0.98				0.788	1.002	0.947	1.049	0.972	0.878	0.927						0.981		0.925		1.023	1.03		1.074					0.915	0.826	0.969		0.964
	0.924	0.993				0.794	0.98	1.018	1.031	0.948	0.866	0.901						0.988		1.012		1.032	1.008		0.985					0.853	0.822	0.994		0.948
	0.948	0.939				0.785	0.966	0.945	1.063	0.966	0.955	0.895						0.981		1.012		0.995	1.004		1.017					0.916	0.792	1.015		0.974
	0.956	0.946				0.851	0.979	0.964	1.058	0.927	0.912	0.871						1.05		1.007		1.009	1.002		0.938					0.915	0.807	0.976		0.941
	0.936	0.974				0.792	0.972	0.959	1.035	0.898	0.915	0.872						0.955		0.947		0.973	0.893		0.994					0.916	0.847	1.024		0.953
	0.895	0.978				0.821	0.925	0.963	0.948	0.852	0.898	0.837						0.975		0.957		0.969	0.911		1.022					0.903	0.799	0.941		0.936
	0.887	0.959				0.785	0.915	0.965	0.993	0.904	0.865	0.878						1.007		0.933		1.007	0.948		1.044					0.839	0.816	0.957		0.934
	0.864	0.909				0.819	0.899	0.947	0.967	0.868	0.859	0.886						1.037		0.976		1.025	1.023		0.941					0.877	0.833	0.937		0.932
	0.894	0.944				0.78	0.853	0.899	1.027	0.87	0.888	0.906						0.99		0.964		0.971	1.015		0.991					0.919	0.828	0.856		0.907
	0.861	0.959				0.808	0.882	0.962	1.041	0.884	0.867	0.92						1.006		0.889		0.988	0.946		0.985					0.936	0.79	0.876		0.924
	0.888	0.849				0.817	0.892	0.915	0.992	0.939	0.863	0.899						0.98		0.949		1.015	1.012		0.961					0.899	0.784	0.869		0.925
	0.882	0.856				0.789	0.824	0.922	0.97	0.886	0.844	0.867						0.96		0.954		0.943	1.003		0.893					0.869	0.806	0.952		0.82
	0.857	0.92				0.804	0.816	0.962	1.011	0.919	0.839	0.835						0.973		0.932		0.941	1.031		0.899					0.859	0.803	0.93		0.886
	0.907	0.948				0.804	0.807	0.962	0.917	0.926	0.858	0.893						0.957		0.947		1.001	0.967		0.89					0.845	0.814	0.919		0.91
	0.913	0.947				0.822	0.812	0.915	0.949	0.946	0.892	0.913						0.995		0.964		0.987	0.984		0.882					0.863	0.839	0.872		0.908
	0.907	0.963				0.793	0.822	0.946	0.942	0.983	0.861	0.951						0.982		0.907		0.975	1.011		0.92					0.885	0.799	0.877		0.877
	0.876	0.929				0.789	0.814	1.005	1.022	0.939	0.88	0.835						0.974		0.896		0.999	0.958		0.869					0.88	0.8	0.845		0.863
	0.903	0.908				0.798	0.81	0.987	1.001	0.903	0.888	0.88						0.954		0.94		0.964	0.898		0.944					0.87	0.807	0.824		0.9
	0.891	0.88				0.809	0.804	0.959	0.967	0.907	0.883	0.863						0.924		0.959		0.946	0.961		0.939					0.833	0.834	0.839		0.878
	0.861	0.837				0.814	0.815	0.987	0.985	0.973	0.87	0.855						0.909		0.953		0.985	1.013		0.951					0.852	0.822	0.813		0.852
	0.88	0.834				0.822	0.818	0.981	0.929	0.934	0.827	0.806						0.879		0.934		1.011	1.033		0.958					0.882	0.836	0.841		0.874
	0.893	0.84				0.82	0.807	0.932	0.984	0.905	0.823	0.811						0.88		0.96		0.963	0.958		0.902					0.825	0.785	0.946		0.82
	0.878	0.793				0.805	0.801	0.978	0.996	0.895	0.878	0.807						0.844		0.929		0.988	0.997		0.972					0.821	0.794	0.981		0.836
	0.847	0.793				0.816	0.84	0.973	0.962	0.961	0.968	0.819						0.855		0.925		1.003	0.993		0.951					0.87	0.799	0.94		0.876
	0.834	0.798				0.793	0.812	1.049	0.984	0.965	0.922	0.8						0.835		0.97		0.962	0.961		0.917					0.803	0.814	0.906		0.885
	0.849	0.806				0.797	0.922	0.986	0.943	0.946	0.899	0.836						0.839		0.93		0.931	0.941		0.892					0.844	0.841	0.872		0.936
	0.887	0.844				0.812	0.937	0.938	0.935	0.956	0.878	0.845						0.851		0.89		0.941	0.852		0.834					0.833	0.8	0.886		0.956
	0.869	0.904				0.809	0.964	0.923	1.037	0.896	0.916	0.839						0.835		0.903		0.944	0.876		0.867					0.812	0.81	0.882		0.946
	0.889	0.89				0.817	0.877	0.943	0.996	0.938	0.985	0.889						0.832		0.843		0.931	0.972		0.85					0.807	0.783	0.978		0.948
	0.85	0.898				0.793	0.882	0.991	0.955	0.912	0.923	0.851						0.849		0.879		0.939	0.978		0.906					0.815	0.805	0.99		0.919
	0.871	0.888				0.827	0.892	0.999	1.004	0.911	0.954	0.833						0.844		0.933		0.986	0.985		0.92					0.815	0.785	0.974		0.902
	0.877	0.869				0.789	0.864	0.985	0.952	0.979	0.93	0.844						0.838		0.987		0.96	0.964		0.947					0.861	0.79	0.91		0.883
	0.882	0.975				0.796	0.855	0.945	0.99	0.982	0.947	0.891						0.874		0.979		0.925	0.983		0.9					0.855	0.815	0.878		0.923
	0.915	0.953				0.839	0.815	0.982	1.025	0.975	0.957	0.907						0.818		0.933		0.912	0.959		0.942					0.803	0.806	0.94		0.884
	0.92	0.975				0.939	0.91	0.994	1.014	0.948	0.954	0.88						0.845		0.946		0.959	0.911		0.932					0.916	0.936	0.997		0.842
	0.892	0.972				0.956	0.969	0.939	0.966	0.993	0.977	0.916						0.847		0.95		0.965	0.943		0.932					0.949	0.97	1.006		0.883
	0.901	0.945				0.989	0.933	0.943	0.97	0.991	0.967	0.929						0.848		0.956		1.004	1.017		0.918					0.947	0.986	1.012		0.92
	0.859	0.936				0.967	0.978	0.962	1.002	0.991	0.945	0.93						0.808		0.955		0.952	0.99		0.902					0.92	0.984	1		0.926
20h	0.872	0.939				0.988	0.946	0.988	0.972	0.98	0.968	0.946					20h	0.894		0.913		0.968	0.996		0.928	20h				0.902	0.971	1		0.895
	0.904	0.975				0.997	0.89	0.931	0.993	0.98	0.958	0.949						0.877		0.947		0.935	0.931		0.911					0.924	0.981	0.998		0.877
	0.934	0.979				0.978	0.844	0.954	1.032	0.991	0.947	0.927						0.891		0.95		0.976	0.973		0.909					0.955	0.989	1.018		0.936
	0.906	0.966				1.009	0.967	0.958	0.945	0.988	0.968	0.954						0.867		0.938		0.979	0.974		0.954					0.922	1.001	0.983		0.951
	0.908	0.974				0.971	0.949	0.97	1.009	0.954	0.965	0.97						0.862		0.928		0.972	1.024		1.029					0.97	0.991	1.039		0.949
	0.911	0.99				1.009	0.979	0.994	0.963	0.974	0.972	0.976						0.86		0.942		1	1.003		1.089					0.978	1.015	1.017		0.975
	0.917	1.009				0.994	0.979	0.974	0.965	0.981	0.967	0.958						0.906		0.961		1.013	0.94		1.014					0.951	1.002	1.014		0.976
	0.949	1.013				1.015	1.01	1.007	1.025	0.984	0.958	0.988						0.915		0.955		1.009	1.027		0.944					0.949	1.027	1.003		0.986
	0.967	1.01				1.022	1.011	1.002	0.972	0.998	0.958	0.955						0.86		0.956		1.027	1.14		0.971					0.965	1.014	1.035		0.98
	0.976	0.998				1.034	1.005	1.007	1.063	0.993	0.944	0.965						0.862		0.955		1.038	0.975		0.951					0.972	1.022	1.043		0.968
	0.973	1.002				1.033	1.01	0.977	1.028	1.008	0.977	0.963						0.911		0.945		0.981	0.966		1.03					0.963	1.013	1.02		0.986
	0.947	1.034				1.058	1.038	0.997	1.002	0.986	0.967	0.995						0.911		0.956		1.019	0.944		1.02					0.993	1.031	1.027		0.999
	0.965	1.006				1.015	1.016	0.989	0.964	0.996	0.934	0.937						0.879		0.966		1.031	1.019		1.066					0.972	1.033	1.032		0.989
	0.972	1.02				1.021	1.01	0.998	1.028	0.973	0.952	0.98						0.864		0.992		1.024	1.187		1.193					0.992	1.015	1.029		0.977
	0.984	1.002				1.051	1.005	0.991	1.014	1.021	0.977	0.979						0.859		0.96		1.008	1.001		0.966					1.018	1.064	1.029		0.962
	0.941	1.007				1.04	0.981	1.001	1.007	0.994	0.951	0.985						0.886		0.96		0.977	0.983		1.045					0.987	1.05	1.036		0.975
	0.977	1.022				1.023	1.004	1.001	1.018	1.043	0.957	0.985						0.873		0.928		1.011	0.953		1.041					1.014	1.042	1.012		0.992
	0.969	0.999				1.044	1.016	0.98	1.068	1	0.96	0.959						0.895		0.935		1.017	0.99		0.974					0.993	1.037	1.045		0.988
	0.972	1.008				1.052	0.991	0.976	1.055	1.026	0.969	0.957						0.914		0.952		1.018	1.051		1.004					0.981	1.048	1.041		0.993
	0.96	1.008				1.038	0.996	0.99	1.02	0.99	0.951	0.971						0.934		0.969		1.043	0.956		1.09					0.975	1.071	1.006		0.992
	0.961	1.007				1.024	0.998	0.957	1.015	1.022	0.909	0.946						0.9		0.954		1.006	0.955		1.134					0.97	1.025	1.034		0.954
	0.94	0.992				1.014	0.985	1.002	1.002	1.027	0.924	0.987						0.867		0.95		0.995	1.015		1.1					0.961	0.985	1.03		0.975
	0.986	0.986				1.051	1.041	0.979	0.948	0.996	0.923	1.003						0.853		0.978		1.042	1.028		0.932					1.024	1.012	1.059		0.969
	0.952	1.041				1.028	1.011	0.96	0.993	0.966	0.933	0.995						0.843		0.965		1.007	1.036		1.041					1.003	0.997	1.037		1
	0.903	1.025				1.011	1.011	0.974	0.996	0.956	0.931	0.968						0.875		0.946		1.032	1.024		0.992					1.001	1.035	1.049		0.969
	0.963	0.948				1.086	1.016	0.936	1.005	0.922	0.893	0.971						0.9		0.94		0.983	1.002		0.958					1.027	1.006	1.031		0.96
	0.953	0.985				1.092	1.007	0.906	1.066	0.956	0.906	0.968						0.919		0.903		1.037	1.028		0.965					1.037	0.992	1.039		0.941
	0.951	1.017				1.054	0.961	0.939	0.992	0.963	0.929	0.959						0.877		0.932		0.962	0.985		0.962					0.915	0.996	1.003		0.945
	0.942	0.962				1.076	0.929	0.878	0.971	0.956	0.92	0.937						0.853		0.959		0.956	0.959		0.916					0.978	1.002	1		0.899
	0.938	0.988				1.039	0.92	0.915	1.025	0.934	0.94	0.951						0.864		0.934		0.92	0.959		0.94					0.966	0.963	0.999		0.854
	0.952	0.961				1.043	0.866	0.869	0.942	0.919	0.944	0.951						0.867		0.941		0.993	1.022		0.926					0.969	0.916	1.011		0.827
	0.947	0.976				1.006	0.985	0.871	0.902	0.955	0.924	0.965						0.85		0.949		0.982	1.004		0.926					0.953	0.934	0.997		0.904
	0.949	0.968				0.968	1.003	0.895	0.983	0.924	0.901	0.963						0.84		0.96		0.982	0.977		1.037					0.967	0.914	1.022		0.913
	0.942	0.939				0.966	1.003	0.899	0.868	0.963	0.935	0.967						0.88		0.981		1.009	0.96		0.896					0.912	0.919	1.012		0.904
	0.926	1.014				0.993	0.982	0.932	0.962	0.934	0.94	0.983						0.857		0.989		0.996	0.919		0.919					0.994	0.919	0.967		0.939
	0.969	0.999				1.022	1.001	0.969	0.895	0.97	0.941	0.959						0.891		0.944		1.014	0.962		0.947					0.988	0.939	0.984		0.916
	0.933	0.974				0.921	0.983	0.957	0.935	0.966	0.962	0.996						0.904		0.927		0.999	0.989		1.104					1.007	0.885	0.958		0.969
	0.942	0.992				0.914	0.921	0.977	1.006	0.943	0.974	0.975						0.869		0.934		0.989	0.98		0.963					0.948	0.855	0.918		0.948
	0.939	0.977				0.94	0.977	0.968	0.995	0.941	0.938	0.954						0.893		0.913		1.033	0.974		0.947					0.986	0.937	0.887		0.953
8h	0.949	1.008				0.967	0.977	0.987	0.94	1.007	0.938	0.94					8h	0.885		0.913		1.021	0.935		1.031	8h				0.996	0.968	0.934		0.966

## Sheet: Fig 5I
Ambulatory activity
Dark phase				Light phase				24h
Ubi	LepRNull	Ubi-LepRNull		Ubi	LepRNull	Ubi-LepRNull		Ubi	LepRNull	Ubi-LepRNull
20231.8	2170	14687.7		6430	1841.67	6244		26791.3	3935.67	19796
23498.8	2459.33	14188.7		10822	1688	6172		35471	3511.5	20100
14550	3011.75	20607.7		7429	1754	8419.5		18858.5	4936	29232
26691.3	2046	35956.2		9245.5	1647	9920.33		35884	3647	44884.3
24647.7	3703.5	9470.5		5915	2247.33	3767		27399.5	5186.33	13145.3
18815.5	2092.75	18666		7253	1098.67	9687.67		24055.7	3018	29288
17929	3710.67	11632		7560	2463	4551		25209.7	6020.5	16722
35109.8	4552.75	22340.5		13206	1965.67	8418		50562	6150.67	31172.3
12189.2		32709		4362		9217.5		15166.7		38520
17411.2				6091				22135.3
31624.8				5635.67				41088.3
18939.5				4067				23594.3
22814.3				6460.5				27608.5
23859				9173				27664
23217.7				7130.5				27117
36813.3				8683.5				47211

## Sheet: Fig 5J
Ambulatory activity
Time of day	Ubi																Time of day	LepRNull								Time of day	Ubi-LepRNull
18h	17	3	130	4	344	1	361	207	0	134	10	464	142	41	1848	22	18h	3	2	53	6	6	14	3	215	18h	13	486	39	78	7	397	219	8	8
	32	1	27	8	9	56	17	17	43	2	0	114	46	10	326	124		4	70	3	3	25	1	2	2		4	723	7	0	0	19	61	6	5
	93	2	14	29	13	62	5	13	981	43	25	1	11	14	9	60		33	4	0	14	0	7	60	6		1	5	63	0	75	8	4	374	222
	89	26	33	448	1	73	9	221	251	298	3	1	22	1	2	6		126	4	9	29	41	16	67	9		43	2	35	60	132	1	1	220	40
	3	218	57	617	38	42	608	19	1	9	16	157	116	23	16	13		6	50	33	47	137	19	203	28		1	63	855	369	2	6	13	2	0
	10	2	75	11	83	5	181	43	342	8	58	139	94	122	1	152		6	59	41	10	6	218	15	50		28	47	33	41	172	168	43	1	31
20h	37	0	34	3	581	4	78	10	125	906	108	1	9	574	210	46	20h	52	174	75	47	292	100	148	47	20h	245	1	104	233	374	8	151	2	77
	203	20	896	101	532	102	1	693	5	340	96	570	40	511	6	21		112	291	1	139	197	9	108	90		6	19	56	334	41	324	111	1004	405
	89	93	840	556	253	227	43	39	1498	131	123	703	63	72	319	304		5	112	74	85	91	93	86	229		194	24	827	1809	432	280	43	1220	14
	263	33	102	1265	1667	51	154	779	1710	3091	575	783	260	0	84	1236		6	160	17	40	258	210	209	1		457	836	1525	2212	201	540	627	180	165
	613	436	81	18	1846	1272	229	994	1182	1428	874	70	369	51	787	2428		95	136	0	120	457	45	107	46		225	1390	2353	3017	193	139	880	7	1418
	1146	761	1109	31	1370	1172	1665	136	34	1574	433	368	749	288	1146	878		135	144	117	96	173	39	102	12		430	231	550	3303	1	1753	162	36	168
	1373	413	997	30	446	1763	17	1637	78	573	69	338	229	4	1991	1994		13	95	128	4	14	277	102	13		443	62	253	2913	423	355	336	936	85
	166	28	553	1091	1022	2835	761	252	520	9	156	192	128	79	2088	173		49	43	41	29	276	25	93	710		73	333	0	2838	361	58	181	835	836
	327	45	220	1868	21	894	282	495	35	13	378	742	124	1509	1270	247		94	112	0	47	115	2	178	470		15	166	80	2622	622	236	687	4	35
	18	18	48	412	13	523	760	2454	9	28	1018	127	555	1182	1847	18		39	59	30	33	42	137	148	511		3	13	37	2322	128	293	150	2	1090
	27	178	246	17	44	1469	67	2299	154	1352	1360	839	388	1288	1411	943		42	127	110	27	101	148	69	143		61	789	536	1436	113	10	207	384	2152
	425	22	18	241	757	2432	12	1804	67	1507	61	202	16	2254	988	325		68	4	84	31	303	62	68	24		498	1721	1279	1347	681	22	389	1520	2134
	283	39	23	2231	869	403	42	127	44	898	45	461	154	3049	811	85		158	102	6	18	171	5	21	248		175	257	1543	1884	241	497	161	270	1095
	774	126	92	699	119	362	618	2392	1522	79	384	914	635	1259	29	1776		68	30	56	3	231	3	147	216		50	766	798	1767	19	1026	456	66	388
	2017	1554	47	685	76	72	223	1160	2212	32	155	1475	377	2423	84	2571		43	204	188	26	20	81	20	39		786	230	585	1387	215	815	562	86	261
	354	1373	1008	846	823	32	693	69	253	148	474	742	159	1847	27	1708		36	42	0	49	528	71	44	25		1340	408	1360	1533	3	1553	672	429	1954
	447	1663	1320	721	1511	34	1330	2391	1	22	236	363	1213	3373	65	2327		2	5	1	37	21	46	140	4		1231	233	1074	1485	417	821	216	1048	1223
	17	1596	1897	1848	866	82	350	2923	291	1316	1478	222	590	1060	162	1758		91	48	0	49	3	3	168	138		2173	63	1315	551	766	1086	388	1287	3083
	67	1482	1331	130	2163	346	919	1602	819	1528	1288	83	2205	2177	943	1106		42	94	58	12	12	62	64	16		1776	2395	312	927	152	150	260	893	1627
	24	1230	1368	0	1966	368	829	187	80	1588	1021	208	1621	996	1867	1437		163	259	42	6	96	62	191	74		1395	956	19	22	22	657	213	6	2353
	195	155	973	14	915	1290	420	45	15	720	1506	121	202	425	1319	154		3	4	152	3	35	157	180	355		502	1391	30	8	25	35	333	198	1808
	486	7	652	21	1352	1970	681	509	590	181	865	1231	272	354	1587	1516		10	0	0	7	50	36	15	168		54	160	367	480	85	13	123	781	2372
	42	22	873	7	62	1383	269	43	542	8	316	574	790	240	1111	565		0	5	28	23	8	1	13	45		2	3	21	539	293	2	586	1153	1548
	394	2	72	116	16	1838	88	19	0	8	11	89	109	28	1975	674		18	38	78	17	22	67	0	3		110	189	38	4	7	160	125	328	2113
	1598	2	318	565	289	1120	3	353	6	64	125	6	146	3	1154	148		59	145	11	5	240	4	21	3		4	4	707	1	6	477	124	8	753
	850	107	1081	1068	184	247	21	163	245	7	33	129	343	23	888	582		41	12	26	15	36	4	122	25		16	5	1019	2	0	186	74	7	4
	174	4	772	10	246	33	49	368	73	3	41	9	246	632	289	1		0	0	150	68	6	27	162	75		215	3	337	0	147	1	172	21	93
	44	48	329	78	1104	27	514	6	11	261	885	2	858	261	17	704		80	12	7	50	147	43	28	279		12	31	7	89	112	3	74	53	199
	14	66	22	22	1045	3	260	0	269	5	723	11	734	2	101	136		26	226	0	180	45	52	11	151		15	18	67	215	42	71	45	38	18
	87	49	39	304	23	7	479	93	246	13	9	207	1082	237	198	117		84	4	17	8	40	6	10	16		38	51	24	0	163	4	266	8	17
	50	460	17	534	124	219	17	53	0	68	16	49	564	1003	19	34		0	2	47	7	21	4	92	48		36	3	34	12	453	63	74	193	237
	7	1766	975	22	219	19	368	34	14	680	65	137	453	158	119	340		33	190	51	48	279	192	155	200		16	0	97	1	29	903	289	124	186
	49	771	359	875	423	3	32	110	28	367	183	176	1185	1	12	1010		31	170	273	29	82	46	72	63		573	4	135	756	149	950	38	1027	223
	232	768	48	230	50	65	54	45	505	204	192	1168	1052	77	491	250		15	13	3	24	10	45	51	129		69	61	83	479	1006	21	14	249	384
	272	467	23	269	486	1187	643	9	453	22	614	318	828	14	433	618		50	174	4	141	63	35	123	294		50	0	304	340	341	8	228	768	154
	855	65	61	1697	1982	802	558	633	95	66	530	161	524	529	626	1935		111	113	6	53	342	69	120	194		350	317	105	3	213	215	116	217	1798
	1915	706	806	1712	1708	127	1510	1693	16	87	1109	1206	1478	846	211	395		168	90	110	273	386	7	224	152		281	388	457	30	213	685	12	1369	1458
	1721	927	428	2566	1493	4	1307	574	879	382	1812	1475	2257	2148	311	513		77	61	210	109	186	71	200	376		1117	15	1473	573	702	822	32	2060	2510
	1332	1882	222	1536	1170	15	488	5	1018	1134	735	184	1217	1970	1316	1055		53	13	282	85	257	108	172	3		845	144	143	903	349	475	511	1349	1897
	856	664	491	2358	1138	52	1933	1173	699	669	39	520	1923	1648	1368	1257		226	218	18	95	341	159	33	21		1078	1030	144	556	7	146	466	933	1187
8h	470	986	1069	823	59	31	1953	2416	9	25	10	749	644	1431	710	1074	8h	144	67	6	16	58	57	72	7	8h	163	567	262	1187	7	60	972	1079	1910
	68	1307	850	493	31	532	60	1818	342	0	51	247	148	2291	715	1132		25	2	11	29	116	38	293	130		46	23	135	1204	468	1893	366	515	1478
	21	597	666	17	23	658	20	1335	505	22	12	7	206	475	826	32		4	3	13	31	16	4	12	117		46	188	4	316	247	1217	2	8	242
	38	58	693	16	26	69	4	587	167	8	2	16	77	34	281	215		48	124	15	103	162	19	1	2		54	550	600	2	115	809	8	19	12
	284	12	99	8	149	440	0	6	0	158	365	97	124	5	4	2		37	58	0	1	227	1	1	10		563	292	917	21	112	1403	98	17	17
	180	25	8	63	25	337	32	13	3	389	867	15	428	17	311	17		27	0	50	23	22	2	240	46		1222	307	34	13	10	212	49	167	47
	2	48	7	20	363	31	1	0	550	1199	641	2	539	17	19	69		0	56	154	80	7	50	12	6		167	784	33	4	82	70	4	1079	675
	8	47	102	2227	596	6	766	3	244	240	34	77	802	224	0	75		54	27	12	117	0	7	141	6		10	126	52	872	123	157	238	56	339
	104	491	590	1258	5	68	974	16	9	5	5	306	61	621	166	24		52	8	4	0	106	4	53	79		0	14	26	742	8	180	43	47	22
	27	856	16	226	7	151	508	1003	3	8	38	5	113	65	109	265		64	72	0	64	71	63	11	11		9	28	198	36	290	9	8	55	28
	16	338	48	14	362	8	298	1787	102	7	77	19	1	7	290	21		0	108	14	103	5	1	3	7		0	126	251	1	226	12	323	12	49
	115	1	412	32	3	5	19	680	4	8	0	11	17	6	82	45		2	9	113	0	1	0	84	50		17	9	396	29	22	787	41	14	615
	387	35	26	18	1	122	0	32	158	67	1	103	7	25	1	35		23	10	124	5	71	27	148	0		21	6	17	615	492	396	8	5	167
	651	3	16	29	3	535	14	3	170	504	1	0	15	501	179	898		61	0	37	40	128	85	74	7		18	6	1	287	173	1	122	18	23
	193	11	113	13	20	29	1332	17	0	5	0	0	91	248	733	422		114	16	5	82	5	2	8	147		3	22	33	24	37	19	344	688	11
	4	218	18	60	60	13	574	1201	0	0	61	17	115	416	1580	23		10	125	8	74	60	0	3	0		282	298	74	8	33	31	40	1544	370
	1	519	11	24	93	22	428	1923	3	48	0	55	31	12	25	16		6	111	35	5	0	80	8	2		375	415	21	0	3	149	6	130	550
	68	13	312	11	0	8	25	796	22	1	9	15	769	22	5	18		56	67	160	10	2	87	8	0		559	596	39	13	106	1	41	5	450
	6	22	1329	17	26	65	5	946	247	53	88	15	58	8	5	136		38	11	30	28	7	35	40	106		141	643	11	24	1	3	92	17	15
	58	6	611	687	8	3	2	50	0	1210	4	3	33	187	296	1097		76	174	0	23	0	24	308	142		16	64	28	636	190	56	5	4	4
	27	12	21	477	0	158	0	28	8	218	10	9	4	143	182	100		9	233	0	40	44	1	149	662		18	0	390	99	5	396	11	286	63
	35	20	12	105	1	73	22	25	83	3	7	33	85	22	4	13		5	2	4	90	196	4	21	8		1	128	585	12	2	3	1	917	53
	21	730	36	15	237	168	11	9	234	47	16	663	0	9	18	10		1	1	23	61	221	8	37	14		17	10	1056	4	151	27	246	1426	4
	6	185	41	24	959	9	57	28	5	2	32	128	299	10	101	166		8	0	51	1	10	61	36	2		1	6	1094	1	30	31	77	115	317
	149	6	17	13	499	3	1	129	1	22	2	36	79	223	222	2		15	9	131	7	18	9	18	99		60	6	43	33	15	131	12	7	20
	780	16	20	39	3	19	0	83	65	6	219	17	139	4	3	5		4	1	87	19	3	21	41	92		2	130	4	122	154	2	6	17	28
	375	4	147	339	25	3	27	46	114	22	47	10	35	26	1	52		7	123	8	10	21	2	222	15		46	127	17	708	13	1	16	56	20
	135	135	239	25	0	59	648	20	0	134	0	68	15	30	127	12		18	157	2	52	0	66	53	0		4	7	50	94	12	19	53	13	764
	0	9	41	10	8	48	38	55	69	12	0	572	4	1	611	63		30	186	0	122	22	108	1	9		75	27	2	7	82	373	1	3	317
	8	8	32	10	7	216	0	77	45	15	5	20	38	4	12	1086		101	0	0	171	74	61	77	3		88	104	20	2	29	569	1	9	2
	49	9	20	1	10	186	0	139	0	268	9	51	27	184	10	431		94	41	0	45	93	16	92	0		10	7	528	0	101	55	397	6	8
	60	195	78	519	5	24	1	11	1	16	77	301	5	1240	13	501		58	156	61	0	15	2	53	96		21	1	60	1	6	5	287	314	33
	9	82	635	580	1070	74	12	9	5	13	4	187	19	217	148	1		61	105	131	106	1	3	2	196		646	13	810	167	39	12	1	396	185
	22	9	278	147	367	108	74	82	187	10	63	4	36	42	43	5		10	0	60	95	8	16	3	22		669	776	270	186	149	11	0	28	5
	204	15	7	3	244	27	286	232	746	116	3	18	9	5	269	147		16	0	0	22	133	0	2	8		69	90	128	5	4	73	12	3	11
	812	407	1	113	6	57	88	5	12	338	8	87	26	108	4	2		127	82	0	0	238	6	14	11		23	14	11	5	12	358	29	7	19
	369	778	50	3	3	129	5	1263	1	9	378	938	9	6	89	143		151	68	42	0	69	46	194	99		0	53	10	3	141	22	176	12	503
	9	132	57	7	15	76	0	1428	0	16	1360	47	10	98	10	71		36	68	200	14	1	67	146	59		50	114	52	9	130	6	241	12	543
	12	16	21	1	81	13	4	199	194	38	92	0	45	10	221	3		7	12	18	47	38	171	252	31		231	30	320	282	281	9	0	308	20
	66	7	308	533	109	49	3	24	11	3	18	21	396	28	19	32		6	0	100	26	97	31	1	115		268	1	34	124	50	404	7	86	17
20h	38	14	485	952	27	161	1131	172	350	43	395	344	42	25	32	136	20h	81	134	388	6	41	10	9	4	20h	5	109	2	1	146	187	20	31	61
	120	46	71	6	58	362	209	808	211	131	65	3	20	392	366	109		75	48	60	6	94	88	187	4		22	4	97	3	977	6	57	323	204
	11	54	29	1573	711	1537	887	614	1539	532	479	920	8	18	88	639		243	23	79	55	42	30	165	109		622	173	1199	440	471	25	261	2554	12
	371	72	411	1324	50	461	609	2175	1643	988	2507	932	128	214	475	2145		22	14	104	46	212	238	165	343		449	33	1349	2276	75	948	197	1634	118
	81	1047	1336	1291	618	1774	955	501	176	1185	845	102	361	1265	1221	1903		74	177	121	107	230	110	243	49		270	2068	869	2366	84	626	301	339	1426
	356	688	988	774	635	2076	563	1733	29	1193	1	629	41	274	1464	1350		61	10	120	19	241	8	124	108		96	1099	1234	2538	142	77	428	384	2534
	176	1635	419	1143	33	2188	43	2075	66	615	173	431	170	146	596	1449		15	91	167	9	123	4	10	30		1	744	965	1899	142	124	325	122	2038
	1122	1305	992	181	26	2191	3	491	489	9	1217	39	429	205	560	633		22	8	257	34	145	59	188	517		144	326	167	2504	23	379	114	381	2353
	1107	75	44	7	608	1356	12	2103	40	37	1135	334	107	686	582	99		13	98	182	6	92	123	184	29		33	186	40	2551	457	42	354	361	2935
	48	19	77	46	1797	746	679	420	3	21	50	92	83	18	96	831		131	12	69	19	33	19	130	6		250	144	54	1724	516	43	264	45	174
	146	128	113	1108	202	593	224	2711	14	83	9	684	175	803	45	988		158	18	55	5	170	0	9	11		1113	58	73	503	607	404	363	905	26
	734	238	817	865	22	156	993	776	788	390	75	1748	252	369	83	52		3	24	16	11	209	82	36	476		1476	41	39	1784	53	2593	545	2141	802
	78	1513	363	1431	663	21	433	228	1384	1149	978	135	502	579	160	1102		2	14	217	44	92	40	130	118		111	30	199	956	159	2355	240	435	87
	97	1929	2	948	22	169	1261	1560	573	14	1474	144	2033	1345	40	1701		27	1	43	145	240	0	220	120		25	1795	1449	1773	100	1342	208	208	1181
	221	1232	29	11	45	12	226	223	2	7	1105	182	657	32	407	1849		53	56	166	22	158	60	8	145		3	1318	141	961	73	1412	503	148	570
	1705	2140	90	47	617	249	298	2233	60	53	1358	1660	168	524	364	1141		3	80	7	6	20	56	208	167		55	1148	227	538	103	1309	193	1741	137
	1653	1800	75	316	1509	1117	2	2972	1	77	335	315	174	144	319	2075		3	152	30	48	0	16	124	70		1107	833	2279	15	1216	1151	322	1083	255
	637	1331	42	3	479	1051	29	1466	8	2372	309	1261	109	864	164	2034		122	13	102	133	2	19	216	34		1383	441	495	250	854	220	355	335	530
	79	1006	27	35	44	184	22	336	148	1475	2079	246	1568	638	391	1522		107	0	116	0	92	3	155	8		1387	72	225	641	124	16	207	10	2795
	127	21	42	761	308	124	298	54	838	513	2207	32	1833	2162	1781	871		85	2	211	8	15	0	151	18		1005	69	49	1961	49	9	290	84	2515
	1387	9	1336	2104	1782	5	79	2111	1554	193	1365	107	468	1018	1308	1567		56	10	112	2	5	52	89	4		27	21	220	2195	9	380	48	767	2950
	1804	19	765	897	685	131	1389	963	356	429	173	121	65	482	1345	1156		7	0	8	0	165	6	3	10		9	78	1786	1955	90	339	97	1118	522
	278	2	235	31	22	188	656	368	28	476	112	189	176	253	1496	959		7	27	0	10	89	0	11	49		11	302	1145	409	13	18	46	114	2127
	93	82	1	16	25	4	814	41	0	4	2803	59	338	4	285	0		1	32	77	19	10	28	63	8		65	1471	39	111	78	0	901	1	1429
	41	0	105	14	435	11	331	23	517	28	1567	680	169	32	52	185		42	44	165	73	4	85	173	41		3	313	49	1	488	294	433	11	153
	620	10	11	8	1621	148	35	481	76	5	1232	214	484	42	635	842		17	0	106	19	58	63	2	1		149	304	27	1	385	1537	180	186	29
	1021	39	179	109	50	2	4	605	25	50	801	792	500	313	49	8		175	2	20	52	163	34	4	51		520	14	195	16	0	1395	124	341	73
	294	258	13	319	8	287	0	9	85	133	11	448	198	363	7	24		120	17	25	0	36	30	74	31		408	1	3	6	18	995	21	0	19
	11	998	12	23	49	862	0	12	0	23	2	26	159	589	188	48		25	1	189	0	4	117	91	392		14	10	145	7	19	161	30	7	14
	36	66	281	12	10	927	76	95	158	11	69	133	276	11	342	7		78	0	110	0	306	26	19	21		14	7	40	103	93	3	12	61	480
	149	197	271	187	170	408	1989	188	209	50	19	13	169	28	52	1481		42	6	112	2	45	14	37	54		13	117	121	128	48	8	300	174	172
	148	326	16	100	22	125	275	268	18	999	0	436	498	457	426	1346		5	82	11	25	11	32	86	10		10	1	72	933	104	7	50	500	440
	31	1759	58	870	765	2	118	2768	64	185	14	66	835	16	1060	1442		90	28	13	73	76	44	116	9		40	0	183	1053	282	199	14	464	534
	69	1536	25	12	63	6	137	1986	265	1	4	1115	413	94	27	1233		20	67	26	43	27	48	164	152		24	85	381	382	12	71	126	585	434
	451	1501	282	690	583	15	3	1611	55	33	1	142	882	199	181	1013		72	6	158	231	25	33	96	132		142	50	99	10	360	349	260	646	2021
	638	778	432	3015	2135	354	66	37	226	61	142	603	1668	43	869	1009		146	104	185	31	79	0	150	16		784	52	1372	0	531	1363	493	1237	260
	255	216	97	1192	1424	1092	100	4	1030	126	1	283	659	568	1469	1873		59	126	115	0	56	171	235	426		439	376	231	155	906	684	166	2701	1045
	1139	56	720	2952	1152	1057	609	225	660	58	652	1902	661	601	1450	875		232	0	0	257	305	27	69	336		103	79	708	1139	978	141	3	788	1640
	1454	924	1253	1517	379	255	760	657	185	560	3565	1432	2018	410	1099	976		305	94	4	159	160	51	5	185		301	61	1798	489	95	589	448	1512	2470
	274	1512	348	1393	1763	239	844	682	1	921	2576	569	1540	16	482	51		249	141	0	118	64	13	20	34		321	1387	1204	1410	16	1285	294	297	1139
8h	9	1719	529	974	553	19	1205	3870	72	2897	1169	249	402	1423	11	1204	8h	211	6	9	24	171	5	171	10	8h	309	609	1247	832	9	961	171	19	73
	29	1279	421	175	265	24	715	1338	20	850	1300	73	94	1548	23	946		0	0	20	100	6	86	40	59		873	57	422	0	355	689	6	305	37
	82	544	806	27	5	7	7	69	585	14	802	379	110	243	299	26		107	1	29	12	105	15	6	5		480	176	83	1	146	340	9	630	35
	14	23	189	42	8	66	3	6	1174	7	6	92	3	4	284	11		0	4	0	6	1	0	4	185		17	470	53	242	5	0	151	893	124
	86	0	5	0	32	740	5	8	318	168	13	20	76	11	17	92		35	37	1	31	0	0	52	45		13	608	27	218	0	34	80	50	29
	1244	5	9	49	19	1101	7	80	2	33	101	8	742	332	2	468		86	8	0	27	106	1	191	1		0	632	56	9	11	119	6	9	4
	910	87	3	1951	3	288	0	1445	9	126	11	0	1184	591	375	800		50	2	2	38	308	13	11	0		37	110	181	1	17	1055	7	33	160
	214	38	6	759	206	0	1	377	2	802	639	249	230	11	198	3		18	14	1	96	203	0	9	112		6	7	398	4	3	791	134	711	1061
	3	279	274	253	717	12	10	11	549	78	1293	523	11	1	0	82		18	13	27	102	12	0	17	1		17	105	26	2	441	77	1305	111	824
	26	1341	606	5	573	8	7	1	9	11	213	301	418	229	0	330		183	100	77	38	0	17	2	5		12	1	26	1	679	39	240	13	546
	0	33	124	19	26	601	1	28	1	3	90	1	4	1265	452	15		55	17	134	2	12	0	23	3		224	6	7	1060	15	44	15	6	515
	15	25	3	34	17	1786	676	214	1	110	0	5	71	32	241	13		15	0	34	1	182	1	152	24		819	100	103	1699	407	600	131	7	7
	35	12	21	11	6	351	972	3126	27	3	8	236	48	4	14	263		38	0	148	1	299	4	148	117		43	355	629	838	135	1855	129	49	4
	11	3	30	452	29	80	432	102	32	25	97	138	39	10	5	25		13	0	9	1	42	7	1	143		9	7	552	93	136	625	3	161	200
	8	33	37	34	19	21	14	11	2	10	7	14	54	0	4	27		111	0	138	1	2	10	7	20		1	17	20	9	12	11	45	14	864
	164	0	9	24	28	11	4	337	0	6	1	0	394	148	8	45		105	0	3	3	3	35	42	3		23	99	26	15	71	22	158	2	39
	417	51	10	64	15	0	0	555	766	29	35	9	1055	33	206	1561		0	0	2	43	13	94	82	6		17	2	92	250	13	87	2	15	16
	869	729	171	6	37	71	34	6	15	213	172	80	352	6	1001	248		0	3	3	22	64	60	15	17		25	11	483	6	165	42	5	10	67
	24	861	651	6	18	138	1	23	0	3	4	0	16	25	349	9		0	116	0	116	131	2	6	22		3	8	27	11	10	1	223	207	400
	23	10	337	15	13	89	11	960	203	22	28	6	0	216	0	23		5	91	186	78	0	5	4	3		3	158	11	4	27	11	199	1231	18
	1	9	9	7	13	45	2	568	395	6	7	327	226	10	12	12		94	50	131	2	3	0	68	8		37	12	0	7	42	35	32	26	47
	10	0	16	70	19	4	30	8	15	12	40	44	19	8	61	8		1	7	124	8	18	0	69	8		30	60	6	180	4	10	10	19	1219
	125	0	3	1523	5	12	8	13	20	128	125	29	9	11	62	297		10	4	0	6	15	17	19	2		14	245	6	368	16	361	263	6	257
	184	27	24	526	3	13	2	2	20	1069	720	28	127	345	0	623		3	91	0	7	2	0	10	130		18	10	72	5	122	43	1	7	10
	1	5	26	32	90	20	16	117	2	278	10	23	27	98	104	4		54	8	2	14	0	84	11	73		557	11	13	0	9	56	3	9	1
	9	18	13	1	996	92	9	2	5	0	0	12	1	1	1187	13		73	4	30	4	23	64	6	47		438	8	40	5	2	14	7	2	21
	44	0	15	56	387	99	0	20	14	15	47	10	4	8	31	0		210	3	132	108	167	6	14	6		30	58	820	10	100	42	10	91	74
	269	53	5	15	4	98	14	205	164	0	76	138	140	25	30	33		26	159	117	8	80	1	147	24		6	23	84	81	2	17	21	17	17
	14	255	47	3	16	67	473	13	0	16	5	7	76	222	13	205		0	19	20	120	13	0	121	30		0	68	17	11	46	1	102	69	43
	1	1	310	5	6	15	23	11	0	3	1	198	49	269	236	13		0	1	1	220	2	3	11	4		18	15	25	0	111	15	385	653	627
	47	20	29	291	2	49	0	11	65	6	203	15	13	14	4	0		63	28	4	46	21	3	30	8		0	3	17	820	9	17	10	531	52
	196	12	33	373	12	0	0	681	6	257	12	0	301	2	12	23		25	2	0	52	92	0	15	2		153	89	56	628	18	717	7	8	8
	319	810	120	17	409	2	1	5	63	4	4	15	622	105	3	369		102	2	0	50	0	17	9	95		1001	142	72	10	113	375	176	10	13
	7	457	10	6	637	161	56	14	0	2	25	111	40	120	169	1		50	0	36	7	1	103	136	133		322	104	6	17	18	250	319	2	372
	62	51	84	0	33	133	312	88	32	23	246	2	5	9	2	9		10	11	73	0	30	39	26	202		2	13	45	0	22	19	3	2	17
	26	0	217	5	4	277	315	225	1	18	529	13	216	17	110	3		57	9	245	12	7	2	18	1		6	3	20	8	13	16	5	65	105
	58	15	5	711	8	74	9	0	26	35	7	588	32	1	211	263		7	229	33	1	24	1	35	2		6	8	29	7	187	4	5	260	451
	37	101	440	835	800	8	22	56	339	79	0	221	10	717	6	772		8	23	1	93	12	1	63	2		717	565	1485	38	7	168	239	99	96
	103	71	153	93	286	28	8	23	28	2	18	124	11	1056	19	48		18	0	26	32	14	86	199	27		174	632	872	269	37	296	94	3	17
	13	262	1	2	2	70	52	55	31	43	68	2	131	154	56	19		133	22	130	0	149	16	2	52		17	29	69	32	18	115	7	8	9
20h	72	118	7	6	72	79	747	264	121	36	8	305	19	7	163	109	20h	5	134	33	6	190	155	148	91	20h	53	6	71	0	507	3	10	228	42
	249	2	104	629	413	169	121	3290	1336	60	725	76	243	21	1	11		100	87	107	6	24	34	129	151		186	54	187	143	330	13	320	1402	171
	475	11	408	2372	734	822	1455	1543	1254	1885	2152	57	953	135	175	62		217	9	38	19	90	9	9	47		1095	815	2203	1185	76	211	100	956	99
	12	273	261	741	95	859	920	1588	53	2396	1247	1305	1462	96	90	1413		231	5	107	38	118	97	27	16		1296	171	987	1406	161	165	890	109	683
	79	826	413	8	135	161	274	2844	25	824	77	493	1133	315	946	1189		58	6	237	4	9	77	158	123		91	283	286	1276	34	900	383	894	1275
	759	2742	485	166	2009	855	82	1960	23	70	77	36	231	51	1225	1989		118	43	179	5	192	7	154	266		53	472	79	2257	125	848	860	1300	1211
	953	1552	661	660	596	240	319	2464	137	32	1654	297	71	1296	506	490		47	71	173	59	140	118	217	88		458	97	89	1132	162	1816	208	67	95
	261	2081	809	1258	56	58	14	206	294	73	1584	288	189	1156	136	42		11	15	152	4	41	131	141	19		1440	150	150	1798	141	586	254	9	112
	81	756	176	11	1224	68	8	2201	448	18	55	285	841	97	19	254		54	35	93	2	4	109	7	46		11	86	170	78	17	139	858	2	343
	48	349	14	75	711	515	236	3211	22	316	95	218	103	78	68	2026		45	26	11	76	2	128	115	7		106	724	2613	8	71	91	799	330	1421
	586	3	43	18	14	47	1821	2371	17	75	170	1432	22	573	593	624		126	3	200	343	18	20	58	122		967	1275	2313	162	1060	1141	141	1762	1821
	667	356	84	393	3	230	101	933	7	1817	1874	152	112	1670	23	738		55	161	40	155	132	1	77	211		543	83	807	17	495	1417	203	278	1814
	99	1571	255	1446	75	612	624	1758	0	1122	2562	257	58	375	84	37		28	71	7	211	90	4	117	261		1078	134	170	87	13	864	452	368	226
	809	1477	32	1366	1472	37	85	1649	50	145	1793	590	2475	28	1671	372		138	109	11	25	2	9	15	123		221	861	18	1384	108	512	779	1224	105
	76	1847	214	928	1852	191	447	1154	186	8	709	1853	1268	178	1247	355		42	12	9	3	17	20	82	26		94	808	909	2834	380	182	447	1731	218
	303	815	1002	1468	857	86	762	1178	2	24	87	1078	765	462	534	2811		4	2	112	168	12	138	166	254		21	577	1915	1301	331	1127	131	262	888
	1534	162	719	1286	41	1877	18	38	283	70	1030	160	356	191	33	1542		86	25	97	160	142	76	23	163		9	1151	752	1870	33	842	38	40	122
	1204	15	248	1387	8	2077	262	1383	14	617	1377	59	791	1469	67	2191		29	16	5	13	194	66	19	8		470	676	349	1764	81	328	92	1009	519
	336	109	111	469	414	1373	213	306	11	31	2378	1153	731	1515	780	1668		38	57	102	2	2	25	21	7		1784	110	6	2742	5	229	326	504	1529
	69	815	136	18	1176	359	1780	317	135	453	1453	115	1816	738	1275	1354		61	71	79	2	2	3	39	11		1498	641	126	1128	213	73	933	49	107
	1546	1607	6	5	2276	165	323	31	556	1615	709	64	1056	84	1127	1440		73	91	79	32	3	12	149	3		618	106	60	1907	23	232	466	150	1357
	1938	903	33	248	787	1	1085	12	61	1416	54	57	969	432	371	747		122	2	34	167	89	7	24	146		8	780	2284	260	449	102	95	1265	1044
	453	35	8	627	186	123	232	2107	86	254	63	1318	107	1694	47	1548		66	1	12	68	7	20	13	10		14	528	1338	701	914	780	195	1401	665
	17	24	322	13	8	13	10	869	5	12	413	26	116	1383	16	231		4	13	0	0	1	105	13	14		3	93	306	19	18	2198	1353	52	110
	30	5	13	1	60	245	10	21	2	717	3669	184	668	933	179	584		3	2	21	10	35	59	0	6		9	5	17	2	105	459	746	3	56
	18	20	123	96	46	1770	2	7	6	1650	1597	245	1485	253	253	29		0	4	194	113	117	0	3	1		68	82	8	4	16	444	21	0	15
	67	2	204	1	185	1716	52	33	263	247	818	330	93	20	17	58		7	20	3	6	0	29	37	74		5	6	9	127	75	10	14	75	152
	67	50	4	25	1718	1333	54	178	8	0	64	21	168	218	111	78		46	84	114	0	29	44	248	96		91	0	68	19	87	12	67	29	3
	103	247	21	154	19	275	47	14	5	1	27	41	26	32	1106	12		24	135	11	2	21	4	19	159		26	55	691	749	7	5	122	83	113
	891	812	88	1275	64	67	751	224	6	52	766	268	701	373	563	1417		16	3	1	0	19	5	5	257		10	27	555	2612	10	13	80	132	30
	740	173	86	13	92	7	872	0	68	35	16	123	61	116	42	2458		171	9	2	3	124	169	0	12		38	6	81	1162	187	5	154	20	19
	28	19	10	36	17	18	94	262	485	42	1048	515	15	138	15	1581		40	91	17	2	13	89	50	34		32	1	8	1418	523	1	74	23	150
	84	119	554	22	158	26	18	1917	0	1553	1329	1092	81	129	88	311		9	189	2	5	18	14	112	125		189	10	11	36	7	6	17	2160	584
	41	1105	187	1478	1120	27	2	1928	3	464	380	406	168	239	339	1830		57	3	15	15	29	1	1	198		489	12	76	89	176	61	410	700	525
	133	1936	46	865	86	616	105	26	85	28	7	502	24	357	94	1983		48	1	139	139	29	8	52	153		2	145	50	24	647	534	37	314	20
	1301	730	576	273	26	1622	246	10	169	587	2	131	351	297	528	1493		36	48	2	72	318	131	139	83		4	624	39	0	97	950	510	568	94
	1617	16	427	19	814	1074	644	74	7	960	1095	683	679	257	1354	1743		189	72	3	2	18	105	105	222		146	155	31	1934	21	446	663	1229	519
	1660	22	32	2065	598	44	1610	1284	1	10	3224	1333	35	1853	1056	991		92	89	2	94	123	97	58	22		512	1	601	1445	826	42	27	1891	823
	686	852	229	1354	600	0	1065	2449	626	89	1653	238	405	1414	690	473		58	61	96	126	86	19	173	30		208	120	174	815	539	13	1177	55	575
	432	1085	816	1719	535	0	308	389	479	707	892	5	413	67	285	47		5	9	236	0	26	39	23	3		204	506	48	96	306	14	297	106	246
8h	3	2619				1	954	46	370	16	56	1	77	164	12	298	8h	13		26		20	20	9	337	8h		293	415	8	11	1049	1	1585	112
	109	2193				8	82	9	32	896	56	9						79		0		10	13		83					2	11	992		1285
	88	614				133	11	140	2	1288	53	278						153		5		42	5		14					7	7	1756		916
	28	76				1967	8	11	1	388	9	401						82		2		5	3		44					1713	0	134		678
	1384	178				1940	16	323	2	13	57	23						90		0		61	0		8					1989	927	34		16
	1937	1724				486	3	1602	6	5	1451	0						25		6		13	0		1					303	422	104		73
	592	2008				119	6	950	0	6	635	4						165		36		109	86		155					8	5	34		14
	23	1442				10	2	103	14	2	3	49						14		0		92	99		6					0	1	112		99
	0	526				7	985	13	304	68	5	11						43		50		58	129		0					554	16	4		531
	8	13				4	846	2	203	4	12	192						38		0		0	20		122					1828	0	10		876
	61	0				812	21	37	1	5	55	284						31		0		63	6		4					38	15	1		81
	24	18				1473	6	0	1	0	1	18						10		45		11	60		0					10	6	8		18
	276	141				148	2	5	0	26	5	1						0		30		18	0		1					2	9	1189		0
	208	39				5	19	195	101	3	36	25						85		15		185	1		33					0	196	710		5
	7	690				14	4	725	4	358	1	35						116		4		51	5		1					1	1	293		403
	318	259				16	2	14	0	651	139	135						178		173		0	11		2					1307	7	30		253
	631	25				240	7	8	65	249	12	15						12		42		37	0		0					918	69	18		0
	19	6				254	5	27	278	16	0	1						20		11		3	1		106					3	204	116		0
	12	0				1	171	29	2	18	6	10						3		104		29	5		61					19	2	14		0
	47	9				2	4	0	1	19	800	0						38		82		92	11		114					0	12	2		87
	10	104				13	1	0	1	43	25	118						76		4		70	178		9					549	4	6		10
	20	5				14	3	140	3	68	0	12						25		0		40	39		3					482	2	3		3
	160	33				7	6	111	237	116	1	37						91		0		4	0		20					32	82	321		78
	368	24				52	9	1	1	60	0	269						7		0		2	41		64					6	0	257		1
	8	1				759	2	498	1	14	77	23						100		0		9	0		25					1	9	25		7
	0	56				183	47	76	0	33	26	4						22		60		6	0		14					19	13	29		82
	12	5				2	1851	7	89	236	1	1						39		86		6	0		0					10	1	10		739
	10	3				0	851	9	365	126	11	9						8		0		2	3		10					12	85	6		276
	46	179				11	262	12	529	14	11	45						94		1		3	37		2					0	430	29		16
	160	448				12	11	97	8	3	7	116						32		1		93	143		50					22	0	269		10
	17	21				143	2	542	0	55	86	0						5		53		184	31		115					0	9	392		30
	1	0				353	12	25	0	10	0	1						1		311		53	24		260					1	146	14		14
	39	33				2	44	16	2	52	11	10						1		113		1	7		74					877	71	4		10
	11	9				4	3	5	27	7	34	188						25		53		19	25		0					1280	5	18		26
	35	97				18	83	79	93	16	4	398						31		70		43	6		4					351	94	126		104
	731	1141				761	806	19	45	143	35	7						124		174		120	28		10					701	439	674		17
	241	54				295	1100	7	1	547	13	6						24		47		122	107		0					945	126	266		14
	4	4				17	583	40	17	9	33	87						2		15		240	44		9					16	85	6		517
	39	14				44	95	437	438	4	22	106						24		6		42	10		34					0	53	2		488
	45	48				117	6	50	510	15	370	13						0		0		85	15		49					58	22	50		29
20h	17	193				52	50	28	1257	90	144	59					20h	19		20		70	11		42	20h				1673	247	107		19
	159	9				140	127	2348	284	393	333	1173						32		223		100	138		100					50	60	14		416
	24	5				231	240	2638	2	38	1635	907						23		352		24	72		157					57	195	352		1379
	872	229				493	1233	2049	516	89	75	166						0		88		152	44		394					2221	34	141		1558
	626	377				448	1154	3102	22	754	603	339						36		54		48	8		35					2481	277	208		170
	214	67				106	908	1270	469	1081	70	273						17		51		306	33		8					2016	376	155		500
	231	1584				151	152	2266	717	281	1710	628						9		61		31	116		22					2080	35	259		149
	48	2284				83	0	599	300	56	1719	145						2		21		0	103		117					811	219	1116		40
	95	1897				54	317	133	541	231	1104	719						0		0		2	10		61					82	496	72		1290
	1406	647				46	679	409	3	491	70	632						12		26		83	25		364					14	39	77		1027
	1499	67				858	292	2291	1	77	140	146						17		113		49	29		24					1405	159	439		33
	255	191				751	1042	644	139	869	453	874						8		0		0	120		204					1267	141	1696		461
	102	3843				214	40	145	753	91	3152	1071						0		1		3	14		227					356	28	339		1128
	104	1170				72	8	1792	55	1325	1129	329						0		114		0	0		8					4	359	233		473
	139	525				128	8	662	52	63	312	612						1		46		230	1		40					189	21	677		298
	363	223				32	776	897	1088	248	1658	555						142		10		119	7		128					9	149	1632		892
	868	156				44	926	65	714	206	1579	675						5		20		23	107		153					19	551	1839		104
	1569	512				125	178	429	0	75	938	1545						19		65		6	33		114					1056	541	153		250
	1520	10				34	1380	3470	2	254	619	735						1		70		5	5		125					1324	100	125		4
	520	104				113	219	440	94	1726	87	45						10		55		6	124		4					1818	5	639		95
	1185	749				113	1502	465	35	114	682	158						2		172		77	68		4					1538	57	345		2838
	313	17				12	433	63	12	105	922	61						4		102		117	21		1					39	122	153		718
	1	17				55	46	32	722	75	2158	344						0		3		6	5		7					2	802	317		789
	38	82				1260	0	507	781	565	1585	433						10		0		1	0		22					16	302	54		67
	84	275				383	0	12	442	8	265	159						20		2		7	3		29					145	3	342		7
	1273	299				7	6	28	158	13	10	82						5		0		3	2		27					1	0	78		28
	1667	22				1	1	0	2	24	139	99						4		51		3	6		67					1	228	211		670
	155	128				38	16	65	0	19	175	325						9		219		127	8		31					1483	4	413		47
	27	562				90	2	78	12	131	1543	613						0		2		34	151		199					1835	1	8		3
	133	8				31	7	129	117	15	235	70						0		118		155	35		73					1553	42	203		8
	17	307				5	1881	5	7	9	291	480						0		81		12	1		392					482	369	169		263
	281	131				51	383	46	146	155	210	544						12		224		17	0		50					9	8	24		221
	1011	54				742	830	700	176	55	257	51						36		120		92	0		13					9	110	75		119
	1206	1386				266	60	210	209	221	1719	1601						73		37		11	14		438					978	16	104		162
	14	2385				84	13	446	297	17	1771	226						35		46		21	94		466					1418	597	2040		943
	62	850				18	0	806	240	264	139	883						14		70		22	114		100					129	3	1174		1990
	27	309				7	17	2428	575	77	59	280						7		158		117	45		57					0	167	496		306
	579	0				321	1399	1059	106	1039	1473	1363						21		0		146	16		32					1437	870	115		92
	1626	30				235	591	32	135	991	2993	1369						19		0		20	36		177					1050	126	596		425
8h	1130	20				11	1052	2	20	54	1364	459					8h	51		30		107	116		27	8h				1657	4	711		727
