# Supplementary material for: Long-term consequences of the absence of leptin signaling in early life
Source: eLife. 2019 Jan 29;8:e40970. doi: 10.7554/eLife.40970 (PMC6384028; doi:10.7554/eLife.40970)
Supplement: Figure 6—source data 1. [file elife-40970-fig6-data1.xlsx]

## Sheet: Fig 6A
Serum T4 concentration (ng/ml) in adult male mice
Ubi	LepRNull	Ubi-LepRNull
2.762	2.719	3.015
3.017	2.528	3.236
3.111	2.817	3.715
4.609	3.288	3.606
4.073	3.172	4.307
3.675	3.163	3.653
4.074	3.161	3.273
4.241	3.08	3.802
4.215	2.981	3.846
3.887	3	4.357
3.114	2.523
4.101	2.47
3.183	2.653
3.339	3.448
3.705	3.52
3.245	3.194
3.945	3.164
3.434	1.606
3.948	2.341
3.207
2.95
3.987
4.026
3.304
3.06

## Sheet: Fig 6B
Serum corticosterone (ng/ml)
Ubi	LepRNull	Ubi-LepRNull
67.9987	316.987	35.2667
25.3655	405.298	19.7255
78.1683	186.168	117.997
22.9155	286.55	98.6093
27.1811	116.117	11.1203
23.0028	120.488	17.2349
81.1945	158.09	26.9496
44.2708	144.339	232.828
31.5496	190.317
23.2287

## Sheet: Fig 6C
Serum testosterone (ng/ml)
Ubi	LepRNull	Ubi-LepRNull
1.202	0.94	0.798
2.069	0.389	0.769
0.692	0.394	0.603
0.457	0.781	0.91
0.999	0.555	1.381
2.798	0.346	0.719
1.413	0.542	1.228
0.688	0.338	0.81
3.881	0.731
0.373	0.222
0.752	0.467
0.762	0.804
0.598	0.58
0.558	0.315

## Sheet: Fig 6D
Testicle weight of adult mice
Ubi	LepRNull	Ubi-LepRNull
0.29957	0.152504	0.192773
0.2938	0.163057	0.284882
0.308285	0.153514	0.23034
0.374633	0.129202	0.264658
0.289174	0.102301	0.261448
0.35212	0.102878	0.174007
0.318771	0.120045	0.240027
0.294502	0.105275
0.3066	0.119403
0.259478	0.099252
0.339492	0.105758
0.261988	0.16348
0.312664	0.121866
0.310976	0.096391
	0.093883

## Sheet: Fig 6H
GnRH fiber density
Ubi	LepRNull	Ubi-LepRNull
8.92554	16.7778	13.8735
4.15325	16.2666	9.15375
8.80038	14.3615	11.5513
8.56465	11.8354
11.0704	10.361
8.99763
10.3212

## Sheet: Fig 6I
Hypothalamic gene expression
Kiss1				Nos1
Ubi	LepRNull	Ubi-LepRNull		Ubi	LepRNull	Ubi-LepRNull
1.49588	0.768559	0.66134		1.19908	0.764329	0.901802
1.10687	0.795976	0.694683		1.05492	0.592731	0.882023
0.914173	0.96921	0.687526		1.08212	0.8647	0.797111
0.519496	0.689065	0.631954		0.782502	0.99088	0.822708
0.86788	0.799062	0.893622		0.967794	0.695652	0.792394
0.690024	1.13363	0.654494		0.822969	0.887958	0.851307
1.31957	0.437007	0.74255		1.01388	0.689467	0.886738
1.08611	0.901734	0.551345		1.07674	1.01168	0.672693

## Sheet: Fig 6J
Testicle weight
Young male mice
Ubi	LepRNull	Ubi-LepRNull
0.317599	0.134145	0.199466
0.289322	0.13591	0.26875
0.319128	0.122358	0.2905
0.318467	0.134291	0.226709
0.292734	0.102687	0.235429
0.299427	0.150483	0.267752
0.272321	0.112663	0.267636
0.324453	0.139023	0.18219
0.266667		0.271956
0.300297		0.292435
0.225336
0.291639
0.29331
0.334818
