# Supplementary material for: Long-term consequences of the absence of leptin signaling in early life
Source: eLife. 2019 Jan 29;8:e40970. doi: 10.7554/eLife.40970 (PMC6384028; doi:10.7554/eLife.40970)
Supplement: Figure 7—figure supplement 1—source data 1. [file elife-40970-fig7-figsupp1-data1.xlsx]

## Sheet: Fig S6A
Total distance (cm) in open field
Ubi	LepRNull	Ubi-LepRNull
6.484	0.548	11.216
2.977	0.072	4.672
5.391	0.061	5.927
11.975	0.266	0.465
7.677	0.175	6.313
2.265	4.002	3.478
8.615	0	6.697
8.67	0.128
5.265	0.717
7.816	0.346
3.082	3.764
0	4.39
10.007	4.778
	1.657

## Sheet: Fig S6B
Exploration time (s) in open field
Ubi	LepRNull	Ubi-LepRNull
26.06	9.65	37.71
16.93	0	3.57
29.91	4.15	30.74
43.26	15.8	2.81
29.9	1.94	12.44
4.32	7.35	17.73
32.28	0	27.67
26.57
21.76
29.31
12.89
11.84
36.23

## Sheet: Fig S6C
Exploration time (s) in open field
Ubi	LepRNull	Ubi-LepRNull
3.78	1.12	22.27
19.38	0	7.34
20.56	0	11.1
30.51	0	0
28.79	2.13	7.34
5.21	4.59	0
28.98	0	10.29
24.93
7.69
10.44
5.22
0
25.7

## Sheet: Fig S6D
Latency (s) to step down during trainning
Ubi	LepRNull	Ubi-LepRNull
4.72	10.81	8.47
9.44	7.78	23.35
4.32	13.03	10.56
4.81	4.69	16.72
11.94	4.82	4.78
16.32	4.94	5.9
7.77	3.88
8.87	3.81
17.31	5.37
11.25	6.37
12.56	7.19
	23.06

## Sheet: Fig S6E
Latency (s) to step down during test
Ubi	LepRNull	Ubi-LepRNull
9	20.4	5
165.75	22.88	10.59
5.22	11.56	20.69
12.9	8.03	12.12
72.62	8.38	8.31
4.97	18.4	17.75
24.35	8.13
17.13	5.47
102.56	3.9
300	5.5
14.81	7.75
	2.54

## Sheet: Fig S6F
Number of primarry errors during training in Barnes maze
Days of trainning	Ubi							Days of trainning	Ubi-LepRNull
1	14.25	7	12.75	10.75	8.25	5.25	15	1	5.5	8.75	4.75	9.75	7.25	11.25
2	6	5.5	2.5	2	4.5	3	6.25	2	1.9	6.25	4.25	4	3	2.5
3	2.5	6.25	1	2.25	3.75	1.5	3.5	3	0.5	3.5	0.75	1	3	1.75
4	0.5	3	4.25	0.75	0.25	0.75	0.5	4	0.25	3.5	3	2.25	0.75	4.25

## Sheet: Fig S6G
Time (s) in target zone on day 5 test
Ubi	Ubi-LepRNull
28.7	43.7
52	19.6
86.4	27.3
82.4	85.4
26.9	89.5
24.2	67.7
83.4

## Sheet: Fig S6H
Number of entries during Barnes maze test on day 5
	Ubi				Ubi-LepRNull
Position	Mean	SEM	N	Position	Mean	SEM	N
-9	0.2857	0.1844	7	-9	0.3333	0.2108	6
-8	0.2857	0.1844	7	-8	0.5	0.3416	6
-7	0.2857	0.1844	7	-7	0.1667	0.1667	6
-6	0.1429	0.1429	7	-6	0.3333	0.2108	6
-5	0.1429	0.1429	7	-5	0.1667	0.1667	6
-4	0.1429	0.1429	7	-4	0	0	6
-3	0.1429	0.1429	7	-3	0	0	6
-2	0.2857	0.1844	7	-2	0.1667	0.1667	6
-1	0.8571	0.5533	7	-1	0.8333	0.4773	6
Target	4.143	1.1	7	Target	4	1.265	6
1	1	0.3086	7	1	0.3333	0.2108	6
2	0.4286	0.202	7	2	0.3333	0.2108	6
3	0.2857	0.2857	7	3	0.6667	0.2108	6
4	0.2857	0.1844	7	4	0.1667	0.1667	6
5	0.2857	0.1844	7	5	0.1667	0.1667	6
6	0.1429	0.1429	7	6	0.3333	0.2108	6
7	0	0	7	7	0.1667	0.1667	6
8	0.4286	0.202	7	8	0.1667	0.1667	6
9	0.4286	0.202	7	9	0.5	0.2236	6
Opp.	0.2857	0.1844	7	Opp.	0.3333	0.2108	6

## Sheet: Fig S6I
Time (s) in target zone on day 12 test
Ubi	Ubi-LepRNull
36.3	26.6
34.7	14
16.8	23.4
55	29.4
31.8	22.6
27.1	49
33.9

## Sheet: Fig S6J
Number of entries during Barnes maze test on day 12
	Ubi				Ubi-LepRNull
Position	Mean	SEM	N	Position	Mean	SEM	N
-9	0.2857	0.1844	7	-9	0.3333	0.2108	6
-8	0.5714	0.2974	7	-8	1	0.4472	6
-7	0.2857	0.1844	7	-7	0.6667	0.3333	6
-6	0.4286	0.202	7	-6	0.5	0.2236	6
-5	0.7143	0.2857	7	-5	0.3333	0.2108	6
-4	0.4286	0.2974	7	-4	0.5	0.3416	6
-3	0.1429	0.1429	7	-3	0.1667	0.1667	6
-2	0.4286	0.202	7	-2	0.6667	0.2108	6
-1	1.286	0.5216	7	-1	2.167	0.5426	6
Target	4.429	0.719	7	Target	4	1.549	6
1	1.571	0.4809	7	1	2	0.5164	6
2	0.8571	0.5533	7	2	1.333	0.2108	6
3	0.7143	0.1844	7	3	0.6667	0.2108	6
4	1.143	0.2608	7	4	0.6667	0.2108	6
5	1	0.2182	7	5	0.5	0.2236	6
6	0.5714	0.202	7	6	0.3333	0.3333	6
7	0.2857	0.2857	7	7	0.3333	0.2108	6
8	0.4286	0.202	7	8	0.6667	0.2108	6
9	0.8571	0.2608	7	9	0.5	0.2236	6
Opp.	0.4286	0.202	7	Opp.	0.1667	0.1667	6
