# Supplementary material for: Long-term consequences of the absence of leptin signaling in early life
Source: eLife. 2019 Jan 29;8:e40970. doi: 10.7554/eLife.40970 (PMC6384028; doi:10.7554/eLife.40970)
Supplement: Figure 7—figure supplement 2—source data 1. [file elife-40970-fig7-figsupp2-data1.xlsx]

## Sheet: Fig S7
tdTomato Fiber density
Control	Lep ob/ob
41.8851	12.6429
26.8305	9.93149
18.5434	10.9617
21.7632	12.8981
25.3644
