# Supplementary material for: Long-term consequences of the absence of leptin signaling in early life
Source: eLife. 2019 Jan 29;8:e40970. doi: 10.7554/eLife.40970 (PMC6384028; doi:10.7554/eLife.40970)
Supplement: Figure 7—source data 1. [file elife-40970-fig7-data1.xlsx]

## Sheet: Fig 7A
Brain mass (g)
Adult male mice
Ubi	LepRNull	Ubi-LepRNull
0.44	0.38	0.44
0.44	0.4	0.42
0.44	0.41	0.43
0.44	0.37	0.45
0.46	0.4	0.45
0.44	0.39	0.44
0.46	0.4	0.43
0.43	0.4	0.41
0.46	0.4	0.43
0.44	0.41
0.44	0.42
0.44	0.39
0.43	0.41
0.46	0.41
0.47

## Sheet: Fig 7B
Brain mass (g)
Adult female mice
Ubi	LepRNull	Ubi-LepRNull
0.44	0.4	0.43
0.45	0.39	0.43
0.44	0.38	0.42
0.42	0.37	0.44
0.45	0.39	0.44
0.46	0.38	0.45
0.46	0.38	0.43
0.45	0.4	0.44
0.46	0.39
0.45
0.46
0.46
0.44
0.43
0.47
0.45
0.46
0.46
0.45
0.45
0.45
0.45

## Sheet: Fig 7C
Hypothalamic gene expression
Bdnf				Igf1				Dlg4				Gfap
Ubi	LepRNull	Ubi-LepRNull		Ubi	LepRNull	Ubi-LepRNull		Ubi	LepRNull	Ubi-LepRNull		Ubi	LepRNull	Ubi-LepRNull
1.05812	0.777648	0.82018		1.06883	0.77577	0.87172		1.175	1.00201	1.0548		1.08372	0.647165	0.548958
0.958625	0.71914	0.823876		0.905643	0.734524	0.787361		1.07973	0.853308	0.990301		0.946138	0.538424	0.557648
1.05567	0.83587	0.869216		1.07138	0.558921	0.683544		1.03317	0.953766	1.02853		0.909069	0.722679	0.600097
0.896154	0.898661	0.786117		0.97793	0.699316	0.753223		0.908215	0.914246	0.945349		0.932198	0.71287	0.687232
1.01641	0.658549	0.820161		1.17192	0.673573	0.610043		0.972367	0.801263	0.956588		0.944435	0.58794	0.547125
0.853167	0.868907	0.868869		0.829999	0.53646	0.768954		0.846626	0.890348	0.840593		1.2557	0.866695	0.690632
1.10947	0.829989	0.887508		1.09665	0.998321	0.757152		0.988551	0.775172	0.9298		0.790014	0.843355	0.624152
1.05239	0.921478	0.671965		0.877639	0.836419	0.756057		0.996348	0.878177	0.905909		1.13873		0.694105

## Sheet: Fig 7D
Brain mass (g)
Young male mice
Ubi	LepRNull	Ubi-LepRNull
0.45	0.4	0.44
0.45	0.4	0.44
0.43	0.42	0.42
0.46	0.4	0.42
0.45	0.39	0.43
0.43	0.42	0.44
0.46	0.41	0.46
0.45	0.42	0.44
0.46		0.43
0.42
0.45
0.45
0.48
0.46
0.47

## Sheet: Fig 7E
Brain mass (g)
Young female mice
Ubi	LepRNull	Ubi-LepRNull
0.45	0.41	0.43
0.45	0.39	0.43
0.45	0.39	0.45
0.46	0.39	0.45
0.47	0.4	0.43
0.45		0.44
0.45
0.44
0.44
0.44
0.43
0.42

## Sheet: Fig 7F
AgRP fiber density in the PVH of adult mice
Ubi	LepRNull	Ubi-LepRNull
11.5267	6.89076	12.9031
19.2712	2.46521	11.5294
14.2287	6.41844	22.3248
26.8238	9.24732	14.0616
12.2607	3.90605	4.98716
17.0248	9.91595

## Sheet: Fig 7G
POMC fiber density in the PVH of adult mice
Ubi	LepRNull	Ubi-LepRNull
6.37375	1.45033	5.68504
5.3654	3.00407	3.87288
5.26503	1.99763	4.1472
6.77753	1.94623	6.06691
6.18452	5.34882
10.2005	5.78512
